# Supplementary material for: Computational analysis of potential candidate genes involved in the cold stress response of ten Rosaceae members
Source: Research Square preprint supplement (doi:10.21203/rs.3.rs-1414236/v1), 2022-03-15
Supplement: Supplementary file 2 [file e8e8f5da2ab197c1a376bfa7.xlsx]

## Sheet: STIFAL TFBSs
Supplementary Table S5. Popular transcription factor binding sites predicted for each syntelog genes using STIFAL (http://caps.ncbs.res.in/stif/). A z-score threshold of 1.5 was applied to filter out false positive hits. The position of binding sites in the 1000bp promoter region has been included in the table.
No.	TF family	Transcription Factors	Name of Cis-element	Cis-element	Stress Signals
1	ABI3_VP1	ABRE_ABI3_VP1	distB ABRE	GCCACTTGTC	ABA
2	AP2_EREBP	DREB_AP2_EREBP	GCC-box	GCCGCC	COLD, DROUGHT
		GCC_box_AP2_EREBP	CRT/DRE	(A/G)CCGAC
3	ARF	AuxRE_ARF	AuxREs	TGTCTC	AUXIN
4	bHLH	N_box_bHLH	N box	CACG(G/A)C	NaCl, ABA, DROUGHT
		G_box_bHLH	G box	CACGTG
5	bZIP	G_box1_bZIP	G box1	CCACGTGG	ABA, DROUGHT
		G_box2_bZIP	G box2	TGACG(T/C)
		C_ABRE_bZIP	C/ABRE	CGCGTG
		G_ABRE_bZIP	G/ABRE	(C/T)ACGTGGC
6	HB	HBE_HB		CAATNATTG	ABA, DROUGHT
7	HSF	HSE1_HSF	HSE	TTCNNGAAGAANNTTC	DROUGHT, HEAVY-METAL STRESS, OXIDATIVE STRESS
8	MYB	Myb_box1_MYB		(T/C)AAC(G/T) G	DEHYDRATION, WOUNDING
		Myb_box2_MYB		CC(T/A)ACC
		Myb_box3_MYB		TAACTG
		Myb_box4_MYB		CC(TA)AACC
		Myb_box5_MYB		(C/T)AACN(A/G)
9	NAC	Nac_box_NAC		CATGTG	DROUGHT, HIGH SALINITY, ABA
10	WRKY	W_box_WRKY	W box	(T)TGAC(C/T)	Biotic stress (pathogen attack), Abiotic Stress (wind, rain, hail)
Shameer K et al., 2009. STIFDB-Arabidopsis Stress Responsive Transcription Factor DataBase. Int. J. Plant Genomics.

## Sheet: F. vesca
Gene	TF_Name	Z-Score	Start	End
mrna17830.1-v1.0-hybrid	G_box_bHLH	3.1995	-161	-156
Gene	TF_Name	Z-Score	Start	End
mrna10124.1-v1.0-hybrid	N_box_bHLH	3.1951	-721	-716
mrna10124.1-v1.0-hybrid	N_box_bHLH	3.1951	-724	-719
mrna10124.1-v1.0-hybrid	N_box_bHLH	3.1951	-682	-677
mrna10124.1-v1.0-hybrid	Myb_box5_MYB	2.6357	-614	-609
mrna10124.1-v1.0-hybrid	Myb_box1_MYB	2.6362	-614	-609
mrna10124.1-v1.0-hybrid	Nac_box_NAC	2.5266	-71	-66
mrna10124.1-v1.0-hybrid	Nac_box_NAC	2.5266	-434	-429
mrna10124.1-v1.0-hybrid	Myb_box3_MYB	1.9287	-384	-379
mrna10124.1-v1.0-hybrid	DREB_AP2_EREBP	2.5244	-182	-177
Gene	TF_Name	Z-Score	Start	End
mrna14774.1-v1.0-hybrid	AuxRE_ARF	2.5947	-635	-630
mrna14774.1-v1.0-hybrid	AuxRE_ARF	2.5947	-569	-564
mrna14774.1-v1.0-hybrid	HSE1_HSF	1.5087	-987	-980
mrna14774.1-v1.0-hybrid	W_box_WRKY	2.1174	-997	-992
mrna14774.1-v1.0-hybrid	W_box_WRKY	2.1174	-173	-168
mrna14774.1-v1.0-hybrid	Myb_box5_MYB	2.7293	-727	-722
mrna14774.1-v1.0-hybrid	Myb_box5_MYB	2.7293	-6	-1
Gene	TF_Name	Z-Score	Start	End
mrna30810.1-v1.0-hybrid	Myb_box2_MYB	2.5996	-880	-875
mrna30810.1-v1.0-hybrid	AuxRE_ARF	2.5455	-997	-992
mrna30810.1-v1.0-hybrid	Myb_box3_MYB	2.0487	-452	-447
mrna30810.1-v1.0-hybrid	Myb_box1_MYB	2.0668	-10	-5
mrna30810.1-v1.0-hybrid	Myb_box5_MYB	1.9513	-881	-876
mrna30810.1-v1.0-hybrid	Myb_box5_MYB	1.9513	-871	-866
mrna30810.1-v1.0-hybrid	Myb_box5_MYB	1.9513	-10	-5
mrna30810.1-v1.0-hybrid	Myb_box5_MYB	1.9513	-200	-195
mrna30810.1-v1.0-hybrid	Myb_box5_MYB	1.9513	-113	-108
mrna30810.1-v1.0-hybrid	G_box2_bZIP	2.7421	-907	-902
Gene	TF_Name	Z-Score	Start	End
mrna12691.1-v1.0-hybrid	W_box_WRKY	1.5042	-602	-597
mrna12691.1-v1.0-hybrid	Nac_box_NAC	2.9491	-172	-167
mrna12691.1-v1.0-hybrid	AuxRE_ARF	2.9674	-168	-163
mrna12691.1-v1.0-hybrid	G_box_bHLH	3.686	-868	-863
mrna12691.1-v1.0-hybrid	Myb_box5_MYB	2.2614	-766	-761
mrna12691.1-v1.0-hybrid	Myb_box5_MYB	2.2614	-808	-803
Gene	TF_Name	Z-Score	Start	End
mrna04348.1-v1.0-hybrid	Myb_box1_MYB	2.143	-665	-660
mrna04348.1-v1.0-hybrid	Myb_box5_MYB	2.0448	-760	-755
mrna04348.1-v1.0-hybrid	Myb_box5_MYB	2.0448	-510	-505
mrna04348.1-v1.0-hybrid	Myb_box5_MYB	2.0448	-707	-702
mrna04348.1-v1.0-hybrid	Myb_box5_MYB	2.0448	-822	-817
mrna04348.1-v1.0-hybrid	Myb_box5_MYB	2.0448	-585	-580
mrna04348.1-v1.0-hybrid	Myb_box5_MYB	2.0448	-665	-660
mrna04348.1-v1.0-hybrid	Myb_box3_MYB	2.1276	-841	-836
Gene	TF_Name	Z-Score	Start	End
mrna09611.1-v1.0-hybrid	Myb_box5_MYB	2.4589	-130	-125
mrna09611.1-v1.0-hybrid	W_box_WRKY	2.5036	-680	-675
mrna09611.1-v1.0-hybrid	W_box_WRKY	2.5036	-965	-960
mrna09611.1-v1.0-hybrid	G_box_bHLH	3.8156	-18	-13
Gene	TF_Name	Z-Score	Start	End
mrna18342.1-v1.0-hybrid	N_box_bHLH	2.7871	-265	-260
mrna18342.1-v1.0-hybrid	Myb_box5_MYB	1.6017	-307	-302
mrna18342.1-v1.0-hybrid	G_box2_bZIP	1.7229	-149	-144
Gene	TF_Name	Z-Score	Start	End
mrna18721.1-v1.0-hybrid	Myb_box2_MYB	3.0648	-265	-260
mrna18721.1-v1.0-hybrid	W_box_WRKY	2.4512	-515	-510
mrna18721.1-v1.0-hybrid	Myb_box5_MYB	2.2777	-986	-981
mrna18721.1-v1.0-hybrid	Myb_box5_MYB	2.2777	-974	-969
mrna18721.1-v1.0-hybrid	Myb_box5_MYB	2.2777	-248	-243
mrna18721.1-v1.0-hybrid	Myb_box5_MYB	2.2777	-544	-539
mrna18721.1-v1.0-hybrid	Myb_box1_MYB	2.394	-544	-539
Gene	TF_Name	Z-Score	Start	End
mrna17698.1-v1.0-hybrid	G_box_bHLH	3.1842	-909	-904
mrna17698.1-v1.0-hybrid	AuxRE_ARF	2.6155	-363	-358
mrna17698.1-v1.0-hybrid	Myb_box5_MYB	1.8721	-130	-125
mrna17698.1-v1.0-hybrid	Myb_box5_MYB	1.8721	-614	-609
mrna17698.1-v1.0-hybrid	DREB_AP2_EREBP	3.1913	-430	-425
mrna17698.1-v1.0-hybrid	Myb_box2_MYB	2.6146	-664	-659
mrna17698.1-v1.0-hybrid	Myb_box4_MYB	2.478	-425	-419
Gene	TF_Name	Z-Score	Start	End
mrna24014.1-v1.0-hybrid	Myb_box3_MYB	2.1184	-436	-431
mrna24014.1-v1.0-hybrid	Myb_box5_MYB	2.0723	-669	-664
mrna24014.1-v1.0-hybrid	Myb_box5_MYB	2.0723	-277	-272
mrna24014.1-v1.0-hybrid	W_box_WRKY	2.2185	-976	-971
mrna24014.1-v1.0-hybrid	G_box2_bZIP	2.1367	-861	-856
mrna24014.1-v1.0-hybrid	G_box2_bZIP	2.1367	-808	-803
mrna24014.1-v1.0-hybrid	G_box2_bZIP	2.1367	-19	-14
mrna24014.1-v1.0-hybrid	Nac_box_NAC	2.7232	-843	-838
mrna24014.1-v1.0-hybrid	Myb_box1_MYB	2.1393	-277	-272
Gene	TF_Name	Z-Score	Start	End
mrna15552.1-v1.0-hybrid	AuxRE_ARF	2.9628	-901	-896
mrna15552.1-v1.0-hybrid	AuxRE_ARF	2.9628	-113	-108
mrna15552.1-v1.0-hybrid	W_box_WRKY	1.6107	-93	-88
mrna15552.1-v1.0-hybrid	W_box_WRKY	1.6107	-333	-328
Gene	TF_Name	Z-Score	Start	End
mrna24313.1-v1.0-hybrid	Myb_box3_MYB	1.8422	-762	-757
mrna24313.1-v1.0-hybrid	Myb_box3_MYB	1.8422	-288	-283
mrna24313.1-v1.0-hybrid	Myb_box5_MYB	2.5445	-557	-552
mrna24313.1-v1.0-hybrid	Myb_box1_MYB	2.5594	-557	-552
mrna24313.1-v1.0-hybrid	N_box_bHLH	3.045	-727	-722
Gene	TF_Name	Z-Score	Start	End
mrna16619.1-v1.0-hybrid	W_box_WRKY	2.1837	-341	-336
mrna16619.1-v1.0-hybrid	DREB_AP2_EREBP	2.72	-97	-92
mrna16619.1-v1.0-hybrid	GCC_box_AP2_EREBP	4.3416	-362	-357
mrna16619.1-v1.0-hybrid	G_box1_bZIP	4.0505	-336	-329
mrna16619.1-v1.0-hybrid	Myb_box4_MYB	2.6582	-113	-107
mrna16619.1-v1.0-hybrid	Nac_box_NAC	2.8041	-867	-862
mrna16619.1-v1.0-hybrid	Myb_box2_MYB	2.7066	-141	-136
mrna16619.1-v1.0-hybrid	Myb_box5_MYB	2.006	-140	-135
mrna16619.1-v1.0-hybrid	Myb_box5_MYB	2.006	-44	-39
mrna16619.1-v1.0-hybrid	G_box_bHLH	3.3793	-335	-330
Gene	TF_Name	Z-Score	Start	End
mrna13803.1-v1.0-hybrid	C_ABRE_bZIP	4.3689	-348	-343
mrna13803.1-v1.0-hybrid	Myb_box2_MYB	3.1442	-106	-101
mrna13803.1-v1.0-hybrid	Myb_box2_MYB	3.1442	-120	-115
mrna13803.1-v1.0-hybrid	Myb_box2_MYB	3.1442	-262	-257
mrna13803.1-v1.0-hybrid	Myb_box5_MYB	2.3676	-261	-256
mrna13803.1-v1.0-hybrid	Myb_box5_MYB	2.3676	-123	-118
mrna13803.1-v1.0-hybrid	Myb_box5_MYB	2.3676	-960	-955
mrna13803.1-v1.0-hybrid	Myb_box5_MYB	2.3676	-980	-975
mrna13803.1-v1.0-hybrid	Myb_box1_MYB	2.5152	-980	-975
mrna13803.1-v1.0-hybrid	G_box2_bZIP	2.5185	-676	-671
mrna13803.1-v1.0-hybrid	W_box_WRKY	1.743	-628	-623
mrna13803.1-v1.0-hybrid	AuxRE_ARF	3.0828	-984	-979
mrna13803.1-v1.0-hybrid	Nac_box_NAC	3.1514	-580	-575
Gene	TF_Name	Z-Score	Start	End
mrna24224.1-v1.0-hybrid	Myb_box1_MYB	2.4028	-733	-728
mrna24224.1-v1.0-hybrid	W_box_WRKY	2.453	-625	-620
mrna24224.1-v1.0-hybrid	Myb_box2_MYB	3.018	-349	-344
mrna24224.1-v1.0-hybrid	Myb_box2_MYB	3.018	-58	-53
mrna24224.1-v1.0-hybrid	Myb_box5_MYB	2.2596	-733	-728
mrna24224.1-v1.0-hybrid	Myb_box5_MYB	2.2596	-431	-426
mrna24224.1-v1.0-hybrid	Myb_box5_MYB	2.2596	-437	-432
mrna24224.1-v1.0-hybrid	Myb_box5_MYB	2.2596	-433	-428
Gene	TF_Name	Z-Score	Start	End
mrna06004.1-v1.0-hybrid	AuxRE_ARF	2.8371	-221	-216
mrna06004.1-v1.0-hybrid	W_box_WRKY	2.3405	-209	-204
mrna06004.1-v1.0-hybrid	Myb_box5_MYB	2.2285	-16	-11
mrna06004.1-v1.0-hybrid	Myb_box5_MYB	2.2285	-493	-488
Gene	TF_Name	Z-Score	Start	End
mrna08371.1-v1.0-hybrid	AuxRE_ARF	2.3833	-76	-71
mrna08371.1-v1.0-hybrid	AuxRE_ARF	2.3833	-274	-269
mrna08371.1-v1.0-hybrid	AuxRE_ARF	2.3833	-46	-41
mrna08371.1-v1.0-hybrid	AuxRE_ARF	2.3833	-99	-94
mrna08371.1-v1.0-hybrid	Myb_box4_MYB	2.4963	-626	-620
mrna08371.1-v1.0-hybrid	G_box_bHLH	3.1745	-353	-348
mrna08371.1-v1.0-hybrid	Myb_box3_MYB	1.968	-757	-752
Gene	TF_Name	Z-Score	Start	End
mrna24687.1-v1.0-hybrid	G_box_bHLH	3.4253	-137	-132
mrna24687.1-v1.0-hybrid	HSE1_HSF	1.6889	-94	-87
mrna24687.1-v1.0-hybrid	HSE1_HSF	1.6889	-200	-193
mrna24687.1-v1.0-hybrid	Myb_box5_MYB	2.088	-652	-647
mrna24687.1-v1.0-hybrid	Myb_box5_MYB	2.088	-562	-557
mrna24687.1-v1.0-hybrid	Myb_box2_MYB	2.7425	-190	-185
Gene	TF_Name	Z-Score	Start	End
mrna08782.1-v1.0-hybrid	AuxRE_ARF	3.112	-919	-914
mrna08782.1-v1.0-hybrid	DREB_AP2_EREBP	3.0645	-789	-784
mrna08782.1-v1.0-hybrid	Myb_box5_MYB	2.292	-141	-136
mrna08782.1-v1.0-hybrid	Myb_box5_MYB	2.292	-255	-250
mrna08782.1-v1.0-hybrid	Myb_box5_MYB	2.292	-787	-782
mrna08782.1-v1.0-hybrid	G_box2_bZIP	3.2037	-690	-685
mrna08782.1-v1.0-hybrid	G_box2_bZIP	3.2037	-623	-618
Gene	TF_Name	Z-Score	Start	End
mrna08625.1-v1.0-hybrid	Myb_box5_MYB	2.6532	-894	-889
mrna08625.1-v1.0-hybrid	Myb_box3_MYB	1.9864	-480	-475
mrna08625.1-v1.0-hybrid	Myb_box2_MYB	2.7226	-759	-754
mrna08625.1-v1.0-hybrid	Myb_box1_MYB	2.7368	-894	-889
Gene	TF_Name	Z-Score	Start	End
mrna08345.1-v1.0-hybrid	Myb_box5_MYB	1.9598	-274	-269
mrna08345.1-v1.0-hybrid	Nac_box_NAC	2.66	-187	-182
mrna08345.1-v1.0-hybrid	AuxRE_ARF	2.6099	-326	-321
mrna08345.1-v1.0-hybrid	Myb_box4_MYB	2.4868	-166	-160
mrna08345.1-v1.0-hybrid	Myb_box2_MYB	2.6199	-444	-439
Gene	TF_Name	Z-Score	Start	End
mrna08986.1-v1.0-hybrid	G_box2_bZIP	2.125	-150	-145
mrna08986.1-v1.0-hybrid	N_box_bHLH	2.7207	-757	-752
mrna08986.1-v1.0-hybrid	N_box_bHLH	2.7207	-475	-470
mrna08986.1-v1.0-hybrid	N_box_bHLH	2.7207	-732	-727
mrna08986.1-v1.0-hybrid	Myb_box5_MYB	1.9699	-971	-966
mrna08986.1-v1.0-hybrid	Myb_box5_MYB	1.9699	-329	-324
mrna08986.1-v1.0-hybrid	Myb_box5_MYB	1.9699	-156	-151
mrna08986.1-v1.0-hybrid	Myb_box3_MYB	2.0805	-489	-484
mrna08986.1-v1.0-hybrid	Myb_box3_MYB	2.0805	-908	-903
mrna08986.1-v1.0-hybrid	Myb_box3_MYB	2.0805	-941	-936
mrna08986.1-v1.0-hybrid	W_box_WRKY	2.2683	-399	-394
Gene	TF_Name	Z-Score	Start	End
mrna27835.1-v1.0-hybrid	Myb_box5_MYB	2.0462	-721	-716
mrna27835.1-v1.0-hybrid	Myb_box5_MYB	2.0462	-554	-549
mrna27835.1-v1.0-hybrid	Myb_box5_MYB	2.0462	-276	-271
mrna27835.1-v1.0-hybrid	Myb_box5_MYB	2.0462	-561	-556
mrna27835.1-v1.0-hybrid	W_box_WRKY	2.2646	-871	-866
mrna27835.1-v1.0-hybrid	Myb_box3_MYB	2.1583	-238	-233
mrna27835.1-v1.0-hybrid	Myb_box1_MYB	2.16	-554	-549
mrna27835.1-v1.0-hybrid	Myb_box1_MYB	2.16	-276	-271
mrna27835.1-v1.0-hybrid	Myb_box4_MYB	2.7051	-479	-473
Gene	TF_Name	Z-Score	Start	End
mrna02514.1-v1.0-hybrid	Myb_box1_MYB	2.1311	-884	-879
mrna02514.1-v1.0-hybrid	Myb_box1_MYB	2.1311	-886	-881
mrna02514.1-v1.0-hybrid	C_ABRE_bZIP	3.8591	-583	-578
mrna02514.1-v1.0-hybrid	G_box_bHLH	3.3475	-383	-378
mrna02514.1-v1.0-hybrid	GCC_box_AP2_EREBP	4.4672	-205	-200
mrna02514.1-v1.0-hybrid	Myb_box5_MYB	2.0337	-884	-879
mrna02514.1-v1.0-hybrid	Myb_box5_MYB	2.0337	-886	-881
mrna02514.1-v1.0-hybrid	Myb_box5_MYB	2.0337	-27	-22
mrna02514.1-v1.0-hybrid	Myb_box5_MYB	2.0337	-80	-75
Gene	TF_Name	Z-Score	Start	End
mrna11245.1-v1.0-hybrid	AuxRE_ARF	2.5113	-246	-241
mrna11245.1-v1.0-hybrid	N_box_bHLH	2.6287	-129	-124
mrna11245.1-v1.0-hybrid	Nac_box_NAC	2.591	-834	-829
mrna11245.1-v1.0-hybrid	Nac_box_NAC	2.591	-155	-150
mrna11245.1-v1.0-hybrid	G_box2_bZIP	2.7025	-913	-908
Gene	TF_Name	Z-Score	Start	End
mrna17427.1-v1.0-hybrid	Myb_box5_MYB	2.4472	-523	-518
mrna17427.1-v1.0-hybrid	Myb_box5_MYB	2.4472	-90	-85
mrna17427.1-v1.0-hybrid	Myb_box2_MYB	2.2742	-91	-86
mrna17427.1-v1.0-hybrid	Myb_box2_MYB	2.2742	-524	-519
mrna17427.1-v1.0-hybrid	G_box_bHLH	2.9517	-340	-335
mrna17427.1-v1.0-hybrid	G_box_bHLH	2.9517	-491	-486
mrna17427.1-v1.0-hybrid	G_box_bHLH	2.9517	-480	-475
mrna17427.1-v1.0-hybrid	G_box_bHLH	2.9517	-660	-655
Gene	TF_Name	Z-Score	Start	End
mrna11119.1-v1.0-hybrid	GCC_box_AP2_EREBP	4.0786	-941	-936
mrna11119.1-v1.0-hybrid	GCC_box_AP2_EREBP	4.0786	-970	-965
mrna11119.1-v1.0-hybrid	GCC_box_AP2_EREBP	4.0786	-953	-948
mrna11119.1-v1.0-hybrid	Myb_box3_MYB	2.0649	-468	-463
mrna11119.1-v1.0-hybrid	DREB_AP2_EREBP	3.2183	-943	-938
mrna11119.1-v1.0-hybrid	Myb_box5_MYB	1.9189	-312	-307
Gene	TF_Name	Z-Score	Start	End
mrna08833.1-v1.0-hybrid	AuxRE_ARF	2.6824	-784	-779
mrna08833.1-v1.0-hybrid	G_box2_bZIP	2.8176	-60	-55
mrna08833.1-v1.0-hybrid	Myb_box5_MYB	1.9532	-599	-594
mrna08833.1-v1.0-hybrid	Myb_box5_MYB	1.9532	-104	-99
mrna08833.1-v1.0-hybrid	Myb_box5_MYB	1.9532	-425	-420
mrna08833.1-v1.0-hybrid	Nac_box_NAC	2.7262	-362	-357
mrna08833.1-v1.0-hybrid	DREB_AP2_EREBP	2.7046	-596	-591
Gene	TF_Name	Z-Score	Start	End
mrna15117.1-v1.0-hybrid	G_box2_bZIP	2.1998	-176	-171
mrna15117.1-v1.0-hybrid	W_box_WRKY	1.5113	-316	-311
mrna15117.1-v1.0-hybrid	W_box_WRKY	1.5113	-666	-661
mrna15117.1-v1.0-hybrid	W_box_WRKY	1.5113	-634	-629
mrna15117.1-v1.0-hybrid	W_box_WRKY	1.5113	-857	-852
mrna15117.1-v1.0-hybrid	N_box_bHLH	3.3999	-807	-802
mrna15117.1-v1.0-hybrid	AuxRE_ARF	2.7803	-17	-12
Gene	TF_Name	Z-Score	Start	End
mrna00196.1-v1.0-hybrid	Myb_box5_MYB	2.0698	-909	-904
mrna00196.1-v1.0-hybrid	Myb_box5_MYB	2.0698	-907	-902
mrna00196.1-v1.0-hybrid	AuxRE_ARF	2.7949	-790	-785
mrna00196.1-v1.0-hybrid	W_box_WRKY	2.1776	-187	-182
mrna00196.1-v1.0-hybrid	W_box_WRKY	2.1776	-926	-921
Gene	TF_Name	Z-Score	Start	End
mrna27745.1-v1.0-hybrid	Nac_box_NAC	2.9303	-703	-698
mrna27745.1-v1.0-hybrid	Myb_box4_MYB	2.7007	-599	-593
mrna27745.1-v1.0-hybrid	Myb_box4_MYB	2.7007	-163	-157
mrna27745.1-v1.0-hybrid	Myb_box3_MYB	2.1712	-835	-830
mrna27745.1-v1.0-hybrid	Myb_box3_MYB	2.1712	-236	-231
mrna27745.1-v1.0-hybrid	W_box_WRKY	2.219	-614	-609
mrna27745.1-v1.0-hybrid	Myb_box2_MYB	2.7664	-486	-481
mrna27745.1-v1.0-hybrid	Myb_box2_MYB	2.7664	-594	-589
mrna27745.1-v1.0-hybrid	DREB_AP2_EREBP	2.7942	-813	-808
mrna27745.1-v1.0-hybrid	DREB_AP2_EREBP	2.7942	-707	-702
mrna27745.1-v1.0-hybrid	Myb_box1_MYB	3.0149	-793	-788
mrna27745.1-v1.0-hybrid	GCC_box_AP2_EREBP	4.5976	-618	-613
mrna27745.1-v1.0-hybrid	Myb_box5_MYB	2.8869	-793	-788
Gene	TF_Name	Z-Score	Start	End
mrna24870.1-v1.0-hybrid	Nac_box_NAC	2.8741	-360	-355
mrna24870.1-v1.0-hybrid	DREB_AP2_EREBP	3.6819	-249	-244
mrna24870.1-v1.0-hybrid	AuxRE_ARF	2.8467	-696	-691
mrna24870.1-v1.0-hybrid	AuxRE_ARF	2.8467	-478	-473
mrna24870.1-v1.0-hybrid	AuxRE_ARF	2.8467	-19	-14
mrna24870.1-v1.0-hybrid	Myb_box3_MYB	2.202	-718	-713
mrna24870.1-v1.0-hybrid	Myb_box4_MYB	2.9481	-214	-208
mrna24870.1-v1.0-hybrid	W_box_WRKY	2.2675	-920	-915
Gene	TF_Name	Z-Score	Start	End
mrna24989.1-v1.0-hybrid	Myb_box1_MYB	1.9275	-536	-531
mrna24989.1-v1.0-hybrid	Myb_box1_MYB	1.9275	-403	-398
mrna24989.1-v1.0-hybrid	Myb_box5_MYB	1.8401	-536	-531
mrna24989.1-v1.0-hybrid	Myb_box5_MYB	1.8401	-403	-398
mrna24989.1-v1.0-hybrid	G_box2_bZIP	1.9243	-716	-711
mrna24989.1-v1.0-hybrid	W_box_WRKY	2.0104	-187	-182

## Sheet: M. domestica
Supplementary Table S5. Popular transcription factor binding sites predicted for each syntelog genes using STIFAL. A z-score threshold of 1.5 was applied to filter out false positive hits. The position of binding sites in the 1000bp promoter region has been included in the table.
Gene	TF_Name	Z-Score	Start	End
MD04G1058000	Myb_box2_MYB	2.6712	-192	-187
MD04G1058000	W_box_WRKY	2.1096	-188	-183
MD04G1058000	DREB_AP2_EREBP	2.63	-248	-243
MD04G1058000	Myb_box5_MYB	2.7195	-404	-399
MD04G1058000	G_box2_bZIP	2.067	-368	-363
MD04G1058000	Myb_box3_MYB	2.0567	-995	-990
MD04G1058000	Nac_box_NAC	2.7022	-468	-463
MD04G1058000	Nac_box_NAC	2.7022	-632	-627
MD04G1058000	Myb_box1_MYB	2.7812	-404	-399
Gene	TF_Name	Z-Score	Start	End
MD04G1137500	W_box_WRKY	1.6175	-154	-149
MD04G1137500	Myb_box5_MYB	2.1669	-890	-885
MD04G1137500	Myb_box5_MYB	2.1669	-770	-765
MD04G1137500	Myb_box5_MYB	2.1669	-901	-896
MD04G1137500	Myb_box5_MYB	2.1669	-111	-106
Gene	TF_Name	Z-Score	Start	End
MD04G1153300	Myb_box4_MYB	2.2291	-70	-64
MD04G1153300	Myb_box4_MYB	2.2291	-253	-247
MD04G1153300	C_ABRE_bZIP	3.525	-131	-126
MD04G1153300	Myb_box5_MYB	2.4753	-220	-215
Gene	TF_Name	Z-Score	Start	End
MD04G1167700	GCC_box_AP2_EREBP	4.0097	-232	-227
MD04G1167700	G_box_bHLH	3.0931	-522	-517
MD04G1167700	W_box_WRKY	2.0031	-171	-166
MD04G1167700	AuxRE_ARF	2.4786	-846	-841
MD04G1167700	G_box2_bZIP	2.6521	-196	-191
MD04G1167700	Myb_box5_MYB	1.8259	-980	-975
MD04G1167700	Myb_box2_MYB	2.5294	-225	-220
MD04G1167700	Myb_box2_MYB	2.5294	-33	-28
MD04G1167700	Myb_box3_MYB	1.9477	-257	-252
Gene	TF_Name	Z-Score	Start	End
MD04G1180400	DREB_AP2_EREBP	2.1152	-524	-519
MD04G1180400	Myb_box1_MYB	2.2697	-176	-171
MD04G1180400	Myb_box5_MYB	2.2489	-176	-171
MD04G1180400	G_box_bHLH	2.6853	-460	-455
MD04G1180400	Myb_box3_MYB	1.6072	-793	-788
MD04G1180400	G_box1_bZIP	3.2347	-461	-454
MD04G1180400	GCC_box_AP2_EREBP	3.5005	-675	-670
MD04G1180400	GCC_box_AP2_EREBP	3.5005	-433	-428
Gene	TF_Name	Z-Score	Start	End
MD08G1049600	Nac_box_NAC	2.5843	-741	-736
MD08G1049600	Nac_box_NAC	2.5843	-922	-917
MD08G1049600	G_box2_bZIP	1.9979	-745	-740
MD08G1049600	DREB_AP2_EREBP	2.4813	-55	-50
MD08G1049600	DREB_AP2_EREBP	2.4813	-94	-89
MD08G1049600	Myb_box4_MYB	2.4265	-360	-354
MD08G1049600	Myb_box1_MYB	2.6643	-402	-397
MD08G1049600	Myb_box5_MYB	2.5737	-402	-397
MD08G1049600	N_box_bHLH	2.4681	-12	-7
MD08G1049600	C_ABRE_bZIP	3.5767	-65	-60
MD08G1049600	Myb_box3_MYB	1.9833	-187	-182
MD08G1049600	Myb_box3_MYB	1.9833	-472	-467
Gene	TF_Name	Z-Score	Start	End
MD08G1096000	Myb_box5_MYB	2.3632	-446	-441
MD08G1096000	Myb_box5_MYB	2.3632	-558	-553
MD08G1096000	Myb_box5_MYB	2.3632	-560	-555
MD08G1096000	G_box2_bZIP	3.2355	-14	-9
Gene	TF_Name	Z-Score	Start	End
MD08G1138400	Myb_box2_MYB	3.1057	-271	-266
MD08G1138400	Nac_box_NAC	3.1075	-266	-261
MD08G1138400	Myb_box5_MYB	3.2353	-62	-57
MD08G1138400	AuxRE_ARF	3.0662	-91	-86
MD08G1138400	DREB_AP2_EREBP	3.8418	-781	-776
MD08G1138400	GCC_box_AP2_EREBP	4.8211	-779	-774
MD08G1138400	W_box_WRKY	1.7307	-426	-421
Gene	TF_Name	Z-Score	Start	End
MD08G1185000	Myb_box5_MYB	2.8829	-122	-117
MD08G1185000	GCC_box_AP2_EREBP	4.3606	-154	-149
MD08G1185000	Myb_box4_MYB	2.8087	-204	-198
MD08G1185000	Myb_box1_MYB	2.9823	-122	-117
MD08G1185000	Myb_box3_MYB	2.2602	-509	-504
MD08G1185000	Myb_box2_MYB	2.9196	-199	-194
Gene	TF_Name	Z-Score	Start	End
MD08G1218900	W_box_WRKY	1.6687	-78	-73
MD08G1218900	W_box_WRKY	1.6687	-126	-121
MD08G1218900	W_box_WRKY	1.6687	-212	-207
MD08G1218900	Myb_box5_MYB	2.3231	-306	-301
Gene	TF_Name	Z-Score	Start	End
MD08G1219200	Myb_box3_MYB	2.3094	-378	-373
MD08G1219200	Myb_box3_MYB	2.3094	-437	-432
MD08G1219200	Myb_box1_MYB	1.6058	-378	-373
MD08G1219200	Myb_box1_MYB	1.6058	-437	-432
MD08G1219200	AuxRE_ARF	2.9061	-630	-625
MD08G1219200	GCC_box_AP2_EREBP	4.3885	-15	-10
MD08G1219200	G_box2_bZIP	2.9977	-850	-845
MD08G1219200	Myb_box2_MYB	2.9211	-123	-118
Gene	TF_Name	Z-Score	Start	End
MD08G1241600	Myb_box3_MYB	2.178	-978	-973
MD08G1241600	Myb_box5_MYB	1.9472	-149	-144
Gene	TF_Name	Z-Score	Start	End
MD08G1049600	Myb_box2_MYB	2.7023	-891	-886
MD08G1049600	Myb_box2_MYB	2.7023	-906	-901
MD08G1049600	Myb_box2_MYB	2.7023	-849	-844
MD08G1049600	Myb_box5_MYB	1.9703	-24	-19
Gene	TF_Name	Z-Score	Start	End
MD12G1181000	W_box_WRKY	2.0067	-138	-133
MD12G1181000	W_box_WRKY	2.0067	-142	-137
MD12G1181000	DREB_AP2_EREBP	2.4282	-701	-696
MD12G1181000	Myb_box5_MYB	1.7448	-548	-543
MD12G1181000	Myb_box5_MYB	1.7448	-840	-835
MD12G1181000	Myb_box5_MYB	1.7448	-498	-493
MD12G1181000	Myb_box5_MYB	1.7448	-683	-678
MD12G1181000	Myb_box5_MYB	1.7448	-550	-545
MD12G1181000	Myb_box5_MYB	1.7448	-838	-833
MD12G1181000	Myb_box5_MYB	1.7448	-828	-823
MD12G1181000	Myb_box5_MYB	1.7448	-559	-554
MD12G1181000	Myb_box5_MYB	1.7448	-788	-783
MD12G1181000	Myb_box5_MYB	1.7448	-389	-384
MD12G1181000	Myb_box5_MYB	1.7448	-698	-693
MD12G1181000	Myb_box4_MYB	2.3462	-526	-520
MD12G1181000	GCC_box_AP2_EREBP	3.9183	-615	-610
MD12G1181000	AuxRE_ARF	2.5226	-735	-730
Gene	TF_Name	Z-Score	Start	End
MD12G1190700	Myb_box5_MYB	1.7352	-391	-386
MD12G1190700	Myb_box5_MYB	1.7352	-399	-394
MD12G1190700	Myb_box5_MYB	1.7352	-886	-881
MD12G1190700	Myb_box5_MYB	1.7352	-761	-756
MD12G1190700	Myb_box1_MYB	1.8811	-391	-386
MD12G1190700	GCC_box_AP2_EREBP	3.8943	-417	-412
MD12G1190700	N_box_bHLH	3.0713	-505	-500
Gene	TF_Name	Z-Score	Start	End
MD13G1058100	Myb_box3_MYB	2.0053	-962	-957
MD13G1058100	G_box2_bZIP	2.0316	-377	-372
MD13G1058100	W_box_WRKY	2.1586	-864	-859
MD13G1058100	Myb_box5_MYB	2.6086	-452	-447
MD13G1058100	Myb_box2_MYB	2.6051	-424	-419
MD13G1058100	Myb_box2_MYB	2.6051	-986	-981
MD13G1058100	Myb_box2_MYB	2.6051	-748	-743
Gene	TF_Name	Z-Score	Start	End
MD13G1073700	Myb_box5_MYB	2.2226	-612	-607
MD13G1073700	Myb_box5_MYB	2.2226	-181	-176
MD13G1073700	Myb_box5_MYB	2.2226	-42	-37
MD13G1073700	Myb_box5_MYB	2.2226	-399	-394
MD13G1073700	Myb_box5_MYB	2.2226	-44	-39
MD13G1073700	Myb_box5_MYB	2.2226	-211	-206
MD13G1073700	G_box2_bZIP	2.4404	-72	-67
MD13G1073700	Myb_box2_MYB	3.0888	-102	-97
MD13G1073700	Myb_box3_MYB	2.3929	-950	-945
MD13G1073700	Myb_box3_MYB	2.3929	-955	-950
MD13G1073700	W_box_WRKY	1.7417	-274	-269
MD13G1073700	W_box_WRKY	1.7417	-80	-75
MD13G1073700	Myb_box1_MYB	2.3789	-181	-176
MD13G1073700	Myb_box1_MYB	2.3789	-42	-37
MD13G1073700	Myb_box1_MYB	2.3789	-211	-206
MD13G1073700	Myb_box1_MYB	2.3789	-612	-607
Gene	TF_Name	Z-Score	Start	End
MD13G1090300	Myb_box1_MYB	1.7276	-412	-407
MD13G1090300	C_ABRE_bZIP	3.256	-290	-285
MD13G1090300	Myb_box2_MYB	2.6662	-12	-7
MD13G1090300	Myb_box2_MYB	2.6662	-36	-31
MD13G1090300	Myb_box2_MYB	2.6662	-731	-726
MD13G1090300	GCC_box_AP2_EREBP	3.9639	-681	-676
MD13G1090300	Myb_box5_MYB	1.7051	-11	-6
MD13G1090300	Myb_box5_MYB	1.7051	-412	-407
MD13G1090300	Myb_box5_MYB	1.7051	-779	-774
MD13G1090300	Myb_box5_MYB	1.7051	-734	-729
MD13G1090300	Myb_box5_MYB	1.7051	-420	-415
MD13G1090300	Myb_box5_MYB	1.7051	-781	-776
MD13G1090300	Myb_box5_MYB	1.7051	-732	-727
MD13G1090300	Myb_box5_MYB	1.7051	-371	-366
Gene	TF_Name	Z-Score	Start	End
MD13G1103800	DREB_AP2_EREBP	1.965	-455	-450
MD13G1103800	Myb_box1_MYB	2.2107	-216	-211
MD13G1103800	Myb_box2_MYB	1.921	-985	-980
MD13G1103800	N_box_bHLH	2.5404	-199	-194
MD13G1103800	GCC_box_AP2_EREBP	3.205	-102	-97
MD13G1103800	Myb_box5_MYB	2.0658	-216	-211
Gene	TF_Name	Z-Score	Start	End
MD13G1124200	W_box_WRKY	2.1724	-634	-629
MD13G1124200	Myb_box5_MYB	1.9623	-392	-387
MD13G1124200	Myb_box5_MYB	1.9623	-84	-79
MD13G1124200	Myb_box5_MYB	1.9623	-22	-17
MD13G1124200	Myb_box4_MYB	2.5706	-83	-77
MD13G1124200	Myb_box4_MYB	2.5706	-21	-15
MD13G1124200	HSE1_HSF	1.5091	-851	-844
MD13G1124200	N_box_bHLH	2.6752	-77	-72
MD13G1124200	Myb_box2_MYB	2.6647	-362	-357
Gene	TF_Name	Z-Score	Start	End
MD13G1141300	Myb_box5_MYB	1.8118	-377	-372
MD13G1141300	Myb_box5_MYB	1.8118	-375	-370
MD13G1141300	Myb_box5_MYB	1.8118	-753	-748
MD13G1141300	N_box_bHLH	2.4252	-89	-84
MD13G1141300	GCC_box_AP2_EREBP	3.8603	-334	-329
MD13G1141300	GCC_box_AP2_EREBP	3.8603	-288	-283
MD13G1141300	GCC_box_AP2_EREBP	3.8603	-333	-328
MD13G1141300	AuxRE_ARF	2.4176	-76	-71
MD13G1141300	AuxRE_ARF	2.4176	-155	-150
MD13G1141300	Myb_box1_MYB	1.9087	-375	-370
MD13G1141300	Myb_box1_MYB	1.9087	-753	-748
Gene	TF_Name	Z-Score	Start	End
MD13G1184800	Myb_box3_MYB	2.1812	-675	-670
MD13G1184800	Myb_box3_MYB	2.1812	-663	-658
MD13G1184800	Myb_box5_MYB	2.017	-37	-32
MD13G1184800	Myb_box5_MYB	2.017	-487	-482
MD13G1184800	N_box_bHLH	2.7557	-1000	-995
Gene	TF_Name	Z-Score	Start	End
MD13G1200600	Myb_box1_MYB	1.9759	-754	-749
MD13G1200600	Myb_box1_MYB	1.9759	-91	-86
MD13G1200600	Myb_box5_MYB	2.6217	-62	-57
MD13G1200600	Myb_box3_MYB	1.9751	-917	-912
MD13G1200600	Nac_box_NAC	2.5618	-136	-131
MD13G1200600	G_box2_bZIP	1.979	-81	-76
MD13G1200600	G_box_bHLH	3.0596	-116	-111
MD13G1200600	W_box_WRKY	2.0265	-586	-581
MD13G1200600	W_box_WRKY	2.0265	-109	-104
MD13G1200600	G_ABRE_bZIP	3.3126	-116	-109
Gene	TF_Name	Z-Score	Start	End
MD13G1202800	DREB_AP2_EREBP	2.2126	-312	-307
MD13G1202800	G_ABRE_bZIP	2.4741	-92	-85
MD13G1202800	Myb_box2_MYB	2.1576	-367	-362
MD13G1202800	Myb_box2_MYB	2.1576	-377	-372
MD13G1202800	Myb_box2_MYB	2.1576	-37	-32
MD13G1202800	Myb_box1_MYB	1.741	-510	-505
MD13G1202800	G_box2_bZIP	1.7478	-343	-338
MD13G1202800	N_box_bHLH	2.1871	-244	-239
MD13G1202800	Myb_box5_MYB	1.5958	-510	-505
MD13G1202800	Myb_box5_MYB	1.5958	-435	-430
Gene	TF_Name	Z-Score	Start	End
MD13G1203800	Myb_box5_MYB	2.1163	-318	-313
MD13G1203800	Myb_box5_MYB	2.1163	-569	-564
MD13G1203800	G_box2_bZIP	2.1486	-694	-689
MD13G1203800	Myb_box1_MYB	2.1598	-318	-313
MD13G1203800	W_box_WRKY	2.2561	-587	-582
Gene	TF_Name	Z-Score	Start	End
MD15G1116900	AuxRE_ARF	2.5102	-233	-228
MD15G1116900	Myb_box1_MYB	1.8375	-826	-821
MD15G1116900	G_box_bHLH	2.9397	-894	-889
MD15G1116900	Myb_box5_MYB	1.6701	-367	-362
MD15G1116900	Myb_box5_MYB	1.6701	-826	-821
MD15G1116900	W_box_WRKY	2.0054	-411	-406
MD15G1116900	DREB_AP2_EREBP	2.2945	-276	-271
MD15G1116900	G_box1_bZIP	3.49	-895	-888
MD15G1116900	Nac_box_NAC	2.4775	-147	-142
Gene	TF_Name	Z-Score	Start	End
MD15G1129600	Myb_box4_MYB	2.1555	-208	-202
MD15G1129600	Myb_box1_MYB	1.7997	-775	-770
MD15G1129600	Myb_box1_MYB	1.7997	-402	-397
MD15G1129600	DREB_AP2_EREBP	2.8732	-245	-240
MD15G1129600	W_box_WRKY	1.7832	-751	-746
MD15G1129600	AuxRE_ARF	2.1576	-862	-857
MD15G1129600	G_ABRE_bZIP	2.552	-331	-324
MD15G1129600	Myb_box2_MYB	2.2178	-149	-144
MD15G1129600	Myb_box5_MYB	1.6684	-408	-403
MD15G1129600	Myb_box5_MYB	1.6684	-775	-770
MD15G1129600	Myb_box5_MYB	1.6684	-773	-768
MD15G1129600	Myb_box5_MYB	1.6684	-402	-397
Gene	TF_Name	Z-Score	Start	End
MD15G1195800	Myb_box1_MYB	2.0099	-139	-134
MD15G1195800	Myb_box1_MYB	2.0099	-44	-39
MD15G1195800	DREB_AP2_EREBP	3.1822	-330	-325
MD15G1195800	Myb_box3_MYB	2.0299	-999	-994
MD15G1195800	Myb_box5_MYB	2.6573	-932	-927
MD15G1195800	Myb_box5_MYB	2.6573	-839	-834
Gene	TF_Name	Z-Score	Start	End
MD13G1203800	Nac_box_NAC	2.786	-213	-208
MD13G1203800	DREB_AP2_EREBP	2.6253	-149	-144
MD13G1203800	N_box_bHLH	2.6514	-633	-628
Gene	TF_Name	Z-Score	Start	End
MD15G1286600	G_box2_bZIP	2.0606	-362	-357
MD15G1286600	Myb_box5_MYB	1.8907	-477	-472
MD15G1286600	Nac_box_NAC	2.7228	-980	-975
Gene	TF_Name	Z-Score	Start	End
MD15G1287500	Myb_box5_MYB	2.5202	-802	-797
MD15G1287500	Myb_box5_MYB	2.5202	-156	-151
MD15G1287500	Nac_box_NAC	3.269	-749	-744
MD15G1287500	W_box_WRKY	1.8074	-508	-503
MD15G1287500	W_box_WRKY	1.8074	-440	-435
Gene	TF_Name	Z-Score	Start	End
MD15G1290300	Myb_box1_MYB	1.8532	-45	-40
MD15G1290300	Myb_box1_MYB	1.8532	-436	-431
MD15G1290300	Myb_box1_MYB	1.8532	-595	-590
MD15G1290300	HBE_HB	2.0438	-662	-654
MD15G1290300	Myb_box4_MYB	3.3501	-572	-566
MD15G1290300	AuxRE_ARF	3.5256	-652	-647
MD15G1290300	N_box_bHLH	3.3134	-995	-990
MD15G1290300	Myb_box3_MYB	2.6128	-45	-40
MD15G1290300	Myb_box3_MYB	2.6128	-436	-431
MD15G1290300	Myb_box3_MYB	2.6128	-595	-590
MD15G1290300	Myb_box5_MYB	2.5051	-815	-810
MD15G1290300	G_box2_bZIP	3.4676	-496	-491
Gene	TF_Name	Z-Score	Start	End
MD15G1343900	Myb_box3_MYB	1.9545	-493	-488
MD15G1343900	Myb_box3_MYB	1.9545	-322	-317
MD15G1343900	Nac_box_NAC	2.5158	-439	-434
MD15G1343900	Myb_box2_MYB	2.5941	-539	-534
MD15G1343900	Myb_box2_MYB	2.5941	-721	-716
MD15G1343900	AuxRE_ARF	2.4236	-508	-503
MD15G1343900	DREB_AP2_EREBP	2.5317	-409	-404
MD15G1343900	G_box2_bZIP	1.9389	-78	-73
MD15G1343900	Myb_box5_MYB	2.63	-372	-367
MD15G1343900	Myb_box5_MYB	2.63	-774	-769
MD15G1343900	Myb_box1_MYB	2.6559	-774	-769
MD15G1343900	Myb_box1_MYB	2.6559	-372	-367
MD15G1343900	C_ABRE_bZIP	3.4722	-71	-66
MD15G1343900	C_ABRE_bZIP	3.4722	-74	-69
Gene	TF_Name	Z-Score	Start	End
MD15G1356100	Myb_box5_MYB	2.6722	-119	-114
MD15G1356100	W_box_WRKY	2.1454	-845	-840
MD15G1356100	Myb_box2_MYB	2.5213	-125	-120
MD15G1356100	Myb_box2_MYB	2.5213	-120	-115
Gene	TF_Name	Z-Score	Start	End
MD15G1368000	Nac_box_NAC	2.8686	-472	-467
MD15G1368000	Nac_box_NAC	2.8686	-634	-629
MD15G1368000	Myb_box5_MYB	2.167	-496	-491
MD15G1368000	G_box_bHLH	3.4546	-941	-936
MD15G1368000	G_box2_bZIP	2.2315	-492	-487
MD15G1368000	Myb_box1_MYB	2.2606	-496	-491
Gene	TF_Name	Z-Score	Start	End
MD15G1407800	Myb_box5_MYB	2.656	-116	-111
Gene	TF_Name	Z-Score	Start	End
MD16G1124800	Myb_box5_MYB	1.913	-584	-579
MD16G1124800	Myb_box5_MYB	1.913	-469	-464
MD16G1124800	Myb_box5_MYB	1.913	-501	-496
MD16G1124800	Myb_box4_MYB	2.5583	-583	-577
MD16G1124800	Myb_box4_MYB	2.5583	-500	-494
MD16G1124800	G_box_bHLH	3.1425	-559	-554
MD16G1124800	Myb_box1_MYB	2.0367	-469	-464
MD16G1124800	GCC_box_AP2_EREBP	4.0475	-494	-489
MD16G1124800	N_box_bHLH	2.5457	-673	-668
MD16G1124800	N_box_bHLH	2.5457	-577	-572
MD16G1124800	G_box2_bZIP	2.0258	-171	-166

## Sheet: P. avium
Gene	TF_Name	Z-Score	Start	End
Pav_sc0000023.1_g690.1.mk	Nac_box_NAC	2.6851	-32	-27
Pav_sc0000023.1_g690.1.mk	G_box2_bZIP	2.1112	-580	-575
Pav_sc0000023.1_g690.1.mk	G_box2_bZIP	2.1112	-219	-214
Pav_sc0000023.1_g690.1.mk	Myb_box5_MYB	2.9496	-482	-477
Pav_sc0000023.1_g690.1.mk	Myb_box1_MYB	2.9024	-482	-477
Pav_sc0000023.1_g690.1.mk	W_box_WRKY	2.1809	-67	-62
Gene	TF_Name	Z-Score	Start	End
Pav_sc0000030.1_g070.1.mk	N_box_bHLH	4.0387	-31	-26
Pav_sc0000030.1_g070.1.mk	W_box_WRKY	1.8438	-373	-368
Pav_sc0000030.1_g070.1.mk	Myb_box5_MYB	2.5132	-914	-909
Pav_sc0000030.1_g070.1.mk	Myb_box5_MYB	2.5132	-136	-131
Pav_sc0000030.1_g070.1.mk	Myb_box5_MYB	2.5132	-134	-129
Pav_sc0000030.1_g070.1.mk	G_box2_bZIP	2.6168	-342	-337
Pav_sc0000030.1_g070.1.mk	G_box2_bZIP	2.6168	-970	-965
Pav_sc0000030.1_g070.1.mk	Myb_box1_MYB	2.6358	-136	-131
Pav_sc0000030.1_g070.1.mk	Myb_box1_MYB	2.6358	-134	-129
Pav_sc0000030.1_g070.1.mk	HSE1_HSF	2.1408	-940	-933
Gene	TF_Name	Z-Score	Start	End
Pav_sc0000036.1_g260.1.br	HSE1_HSF	1.6294	-503	-496
Pav_sc0000036.1_g260.1.br	Myb_box1_MYB	2.2023	-14	-9
Pav_sc0000036.1_g260.1.br	Myb_box1_MYB	2.2023	-720	-715
Pav_sc0000036.1_g260.1.br	Myb_box4_MYB	2.7773	-35	-29
Pav_sc0000036.1_g260.1.br	DREB_AP2_EREBP	2.8743	-555	-550
Pav_sc0000036.1_g260.1.br	Myb_box3_MYB	2.1963	-577	-572
Pav_sc0000036.1_g260.1.br	Myb_box5_MYB	2.9655	-553	-548
Pav_sc0000036.1_g260.1.br	Myb_box2_MYB	2.9109	-852	-847
Pav_sc0000036.1_g260.1.br	Myb_box2_MYB	2.9109	-104	-99
Gene	TF_Name	Z-Score	Start	End
Pav_sc0000091.1_g350.1.mk	Myb_box5_MYB	2.1477	-584	-579
Pav_sc0000091.1_g350.1.mk	AuxRE_ARF	2.8937	-198	-193
Pav_sc0000091.1_g350.1.mk	W_box_WRKY	2.3474	-686	-681
Pav_sc0000091.1_g350.1.mk	Myb_box1_MYB	2.295	-584	-579
Pav_sc0000091.1_g350.1.mk	G_box2_bZIP	2.2996	-743	-738
Gene	TF_Name	Z-Score	Start	End
Pav_sc0000091.1_g820.1.mk	Myb_box5_MYB	2.6404	-966	-961
Pav_sc0000091.1_g820.1.mk	Myb_box3_MYB	1.97	-133	-128
Pav_sc0000091.1_g820.1.mk	Myb_box1_MYB	2.7071	-966	-961
Pav_sc0000091.1_g820.1.mk	Myb_box4_MYB	2.5377	-125	-119
Pav_sc0000091.1_g820.1.mk	HSE1_HSF	1.6007	-889	-882
Gene	TF_Name	Z-Score	Start	End
Pav_sc0000099.1_g880.1.mk	G_box2_bZIP	2.9825	-14	-9
Pav_sc0000099.1_g880.1.mk	HSE1_HSF	1.7341	-653	-646
Pav_sc0000099.1_g880.1.mk	Myb_box1_MYB	2.2526	-391	-386
Pav_sc0000099.1_g880.1.mk	Myb_box3_MYB	2.2593	-852	-847
Pav_sc0000099.1_g880.1.mk	Myb_box3_MYB	2.2593	-961	-956
Pav_sc0000099.1_g880.1.mk	Myb_box5_MYB	2.109	-826	-821
Pav_sc0000099.1_g880.1.mk	Myb_box5_MYB	2.109	-929	-924
Pav_sc0000099.1_g880.1.mk	Myb_box5_MYB	2.109	-391	-386
Pav_sc0000099.1_g880.1.mk	Myb_box5_MYB	2.109	-551	-546
Pav_sc0000099.1_g880.1.mk	Myb_box5_MYB	2.109	-820	-815
Pav_sc0000099.1_g880.1.mk	Myb_box5_MYB	2.109	-935	-930
Gene	TF_Name	Z-Score	Start	End
Pav_sc0000099.1_g960.1.mk	Myb_box5_MYB	2.1616	-67	-62
Pav_sc0000099.1_g960.1.mk	Myb_box5_MYB	2.1616	-664	-659
Pav_sc0000099.1_g960.1.mk	GCC_box_AP2_EREBP	4.4859	-547	-542
Pav_sc0000099.1_g960.1.mk	Nac_box_NAC	2.8619	-433	-428
Pav_sc0000099.1_g960.1.mk	Myb_box1_MYB	2.2407	-664	-659
Pav_sc0000099.1_g960.1.mk	AuxRE_ARF	2.7935	-935	-930
Gene	TF_Name	Z-Score	Start	End
Pav_sc0000103.1_g160.1.mk	Nac_box_NAC	2.0646	-351	-346
Pav_sc0000103.1_g160.1.mk	DREB_AP2_EREBP	2.6053	-364	-359
Pav_sc0000103.1_g160.1.mk	AuxRE_ARF	2.0813	-703	-698
Pav_sc0000103.1_g160.1.mk	N_box_bHLH	2.5999	-427	-422
Pav_sc0000103.1_g160.1.mk	Myb_box2_MYB	2.1655	-57	-52
Gene	TF_Name	Z-Score	Start	End
Pav_sc0000129.1_g1180.1.mk	G_box_bHLH	3.5323	-620	-615
Pav_sc0000129.1_g1180.1.mk	G_box_bHLH	3.5323	-234	-229
Pav_sc0000129.1_g1180.1.mk	G_box_bHLH	3.5323	-710	-705
Pav_sc0000129.1_g1180.1.mk	Nac_box_NAC	2.9306	-503	-498
Pav_sc0000129.1_g1180.1.mk	G_box2_bZIP	2.3437	-499	-494
Pav_sc0000129.1_g1180.1.mk	W_box_WRKY	2.4131	-700	-695
Pav_sc0000129.1_g1180.1.mk	W_box_WRKY	2.4131	-633	-628
Pav_sc0000129.1_g1180.1.mk	Myb_box1_MYB	2.2999	-383	-378
Pav_sc0000129.1_g1180.1.mk	Myb_box5_MYB	2.1869	-383	-378
Pav_sc0000129.1_g1180.1.mk	Myb_box5_MYB	2.1869	-385	-380
Gene	TF_Name	Z-Score	Start	End
Pav_sc0000131.1_g850.1.mk	Myb_box5_MYB	2.1857	-880	-875
Pav_sc0000131.1_g850.1.mk	N_box_bHLH	2.1049	-120	-115
Pav_sc0000131.1_g850.1.mk	N_box_bHLH	2.1049	-209	-204
Pav_sc0000131.1_g850.1.mk	W_box_WRKY	1.7802	-354	-349
Pav_sc0000131.1_g850.1.mk	Myb_box1_MYB	2.2977	-880	-875
Pav_sc0000131.1_g850.1.mk	Myb_box4_MYB	2.0442	-49	-43
Pav_sc0000131.1_g850.1.mk	Myb_box4_MYB	2.0442	-750	-744
Pav_sc0000131.1_g850.1.mk	Myb_box2_MYB	2.1666	-755	-750
Pav_sc0000131.1_g850.1.mk	Myb_box2_MYB	2.1666	-771	-766
Pav_sc0000131.1_g850.1.mk	Myb_box2_MYB	2.1666	-654	-649
Gene	TF_Name	Z-Score	Start	End
Pav_sc0000146.1_g690.1.mk	Myb_box5_MYB	1.7514	-869	-864
Pav_sc0000146.1_g690.1.mk	Myb_box5_MYB	1.7514	-529	-524
Pav_sc0000146.1_g690.1.mk	Myb_box3_MYB	1.9083	-739	-734
Pav_sc0000146.1_g690.1.mk	G_box_bHLH	3.093	-66	-61
Pav_sc0000146.1_g690.1.mk	Nac_box_NAC	2.6226	-423	-418
Pav_sc0000146.1_g690.1.mk	DREB_AP2_EREBP	2.4049	-855	-850
Pav_sc0000146.1_g690.1.mk	AuxRE_ARF	2.3862	-764	-759
Pav_sc0000146.1_g690.1.mk	AuxRE_ARF	2.3862	-887	-882
Pav_sc0000146.1_g690.1.mk	AuxRE_ARF	2.3862	-701	-696
Pav_sc0000146.1_g690.1.mk	AuxRE_ARF	2.3862	-205	-200
Pav_sc0000146.1_g690.1.mk	Myb_box1_MYB	1.9275	-869	-864
Pav_sc0000146.1_g690.1.mk	Myb_box4_MYB	2.2245	-578	-572
Pav_sc0000146.1_g690.1.mk	Myb_box4_MYB	2.2245	-72	-66
Gene	TF_Name	Z-Score	Start	End
Pav_sc0000183.1_g240.1.mk	Myb_box5_MYB	2.345	-500	-495
Pav_sc0000183.1_g240.1.mk	Myb_box1_MYB	1.6922	-351	-346
Pav_sc0000183.1_g240.1.mk	AuxRE_ARF	2.8543	-41	-36
Pav_sc0000183.1_g240.1.mk	Myb_box3_MYB	2.4113	-351	-346
Pav_sc0000183.1_g240.1.mk	Nac_box_NAC	3.172	-743	-738
Pav_sc0000183.1_g240.1.mk	W_box_WRKY	2.4124	-415	-410
Gene	TF_Name	Z-Score	Start	End
Pav_sc0000206.1_g310.1.br	DREB_AP2_EREBP	2.6434	-671	-666
Pav_sc0000206.1_g310.1.br	Myb_box5_MYB	2.7261	-693	-688
Pav_sc0000206.1_g310.1.br	W_box_WRKY	2.1572	-55	-50
Pav_sc0000206.1_g310.1.br	W_box_WRKY	2.1572	-932	-927
Pav_sc0000206.1_g310.1.br	Myb_box1_MYB	2.8002	-693	-688
Gene	TF_Name	Z-Score	Start	End
Pav_sc0000206.1_g540.1.mk	Myb_box2_MYB	2.8291	-724	-719
Pav_sc0000206.1_g540.1.mk	HSE1_HSF	1.6327	-15	-8
Pav_sc0000206.1_g540.1.mk	G_box2_bZIP	2.2194	-6	-1
Pav_sc0000206.1_g540.1.mk	AuxRE_ARF	2.8186	-907	-902
Pav_sc0000206.1_g540.1.mk	N_box_bHLH	2.733	-44	-39
Gene	TF_Name	Z-Score	Start	End
Pav_sc0000229.1_g230.1.br	Myb_box1_MYB	1.9823	-687	-682
Pav_sc0000229.1_g230.1.br	G_box2_bZIP	2.6693	-288	-283
Pav_sc0000229.1_g230.1.br	Myb_box4_MYB	2.4863	-808	-802
Pav_sc0000229.1_g230.1.br	N_box_bHLH	2.5104	-700	-695
Pav_sc0000229.1_g230.1.br	N_box_bHLH	2.5104	-791	-786
Pav_sc0000229.1_g230.1.br	Myb_box5_MYB	1.854	-687	-682
Pav_sc0000229.1_g230.1.br	DREB_AP2_EREBP	2.5155	-138	-133
Pav_sc0000229.1_g230.1.br	DREB_AP2_EREBP	2.5155	-946	-941
Pav_sc0000229.1_g230.1.br	Myb_box2_MYB	2.553	-382	-377
Gene	TF_Name	Z-Score	Start	End
Pav_sc0000229.1_g400.1.mk	Myb_box1_MYB	1.5617	-559	-554
Pav_sc0000229.1_g400.1.mk	Myb_box1_MYB	1.5617	-878	-873
Pav_sc0000229.1_g400.1.mk	Myb_box1_MYB	1.5617	-933	-928
Pav_sc0000229.1_g400.1.mk	Myb_box3_MYB	2.3442	-559	-554
Pav_sc0000229.1_g400.1.mk	Myb_box3_MYB	2.3442	-878	-873
Pav_sc0000229.1_g400.1.mk	Myb_box3_MYB	2.3442	-933	-928
Pav_sc0000229.1_g400.1.mk	Myb_box5_MYB	2.3866	-269	-264
Gene	TF_Name	Z-Score	Start	End
Pav_sc0000363.1_g270.1.mk	Myb_box5_MYB	1.7194	-184	-179
Pav_sc0000363.1_g270.1.mk	Myb_box5_MYB	1.7194	-520	-515
Pav_sc0000363.1_g270.1.mk	Myb_box5_MYB	1.7194	-538	-533
Pav_sc0000363.1_g270.1.mk	Myb_box3_MYB	1.8624	-230	-225
Pav_sc0000363.1_g270.1.mk	Myb_box3_MYB	1.8624	-568	-563
Pav_sc0000363.1_g270.1.mk	Myb_box4_MYB	2.4097	-874	-868
Pav_sc0000363.1_g270.1.mk	Myb_box4_MYB	2.4097	-223	-217
Pav_sc0000363.1_g270.1.mk	Myb_box2_MYB	2.5438	-882	-877
Pav_sc0000363.1_g270.1.mk	Myb_box2_MYB	2.5438	-861	-856
Pav_sc0000363.1_g270.1.mk	Myb_box2_MYB	2.5438	-878	-873
Pav_sc0000363.1_g270.1.mk	Myb_box1_MYB	1.8359	-520	-515
Gene	TF_Name	Z-Score	Start	End
Pav_sc0000367.1_g210.1.mk	Myb_box4_MYB	2.7238	-422	-416
Pav_sc0000367.1_g210.1.mk	Myb_box2_MYB	2.846	-436	-431
Gene	TF_Name	Z-Score	Start	End
Pav_sc0000375.1_g490.1.mk	Myb_box2_MYB	2.4822	-54	-49
Pav_sc0000375.1_g490.1.mk	Myb_box2_MYB	2.4822	-200	-195
Pav_sc0000375.1_g490.1.mk	Nac_box_NAC	2.5088	-960	-955
Pav_sc0000375.1_g490.1.mk	G_box_bHLH	3.0275	-83	-78
Pav_sc0000375.1_g490.1.mk	Myb_box5_MYB	2.5368	-485	-480
Gene	TF_Name	Z-Score	Start	End
Pav_sc0000428.1_g700.1.mk	Nac_box_NAC	2.606	-551	-546
Pav_sc0000428.1_g700.1.mk	Nac_box_NAC	2.606	-991	-986
Pav_sc0000428.1_g700.1.mk	W_box_WRKY	2.1201	-682	-677
Pav_sc0000428.1_g700.1.mk	N_box_bHLH	2.5685	-656	-651
Gene	TF_Name	Z-Score	Start	End
Pav_sc0000484.1_g280.1.mk	Myb_box5_MYB	2.4821	-284	-279
Pav_sc0000484.1_g280.1.mk	Myb_box4_MYB	2.3797	-402	-396
Pav_sc0000484.1_g280.1.mk	G_box2_bZIP	1.8998	-693	-688
Pav_sc0000484.1_g280.1.mk	Myb_box3_MYB	1.8994	-227	-222
Pav_sc0000484.1_g280.1.mk	W_box_WRKY	1.9598	-397	-392
Pav_sc0000484.1_g280.1.mk	W_box_WRKY	1.9598	-777	-772
Pav_sc0000484.1_g280.1.mk	Myb_box2_MYB	2.4995	-279	-274
Pav_sc0000484.1_g280.1.mk	Myb_box1_MYB	2.5783	-284	-279
Pav_sc0000484.1_g280.1.mk	HBE_HB	1.8381	-493	-485
Pav_sc0000484.1_g280.1.mk	GCC_box_AP2_EREBP	3.8711	-811	-806
Pav_sc0000484.1_g280.1.mk	C_ABRE_bZIP	3.5037	-742	-737
Gene	TF_Name	Z-Score	Start	End
Pav_sc0000484.1_g400.1.mk	Myb_box1_MYB	2.936	-116	-111
Pav_sc0000484.1_g400.1.mk	HSE1_HSF	1.6097	-65	-58
Pav_sc0000484.1_g400.1.mk	Myb_box5_MYB	2.9128	-116	-111
Gene	TF_Name	Z-Score	Start	End
Pav_sc0000691.1_g110.1.mk	N_box_bHLH	2.4015	-900	-895
Pav_sc0000691.1_g110.1.mk	G_ABRE_bZIP	2.7725	-826	-819
Pav_sc0000691.1_g110.1.mk	Myb_box1_MYB	2.5705	-916	-911
Pav_sc0000691.1_g110.1.mk	DREB_AP2_EREBP	2.406	-881	-876
Pav_sc0000691.1_g110.1.mk	Myb_box5_MYB	2.5013	-916	-911
Pav_sc0000691.1_g110.1.mk	G_box_bHLH	2.9932	-856	-851
Pav_sc0000691.1_g110.1.mk	AuxRE_ARF	2.4957	-499	-494
Gene	TF_Name	Z-Score	Start	End
Pav_sc0000704.1_g020.1.mk	N_box_bHLH	2.6203	-567	-562
Pav_sc0000704.1_g020.1.mk	G_box_bHLH	3.2514	-585	-580
Pav_sc0000704.1_g020.1.mk	Myb_box4_MYB	2.6307	-555	-549
Pav_sc0000704.1_g020.1.mk	DREB_AP2_EREBP	2.6419	-190	-185
Pav_sc0000704.1_g020.1.mk	DREB_AP2_EREBP	2.6419	-850	-845
Pav_sc0000704.1_g020.1.mk	G_box2_bZIP	2.0819	-118	-113
Pav_sc0000704.1_g020.1.mk	Myb_box5_MYB	1.939	-678	-673
Pav_sc0000704.1_g020.1.mk	Myb_box5_MYB	1.939	-704	-699
Pav_sc0000704.1_g020.1.mk	Myb_box5_MYB	1.939	-712	-707
Pav_sc0000704.1_g020.1.mk	Myb_box5_MYB	1.939	-680	-675
Pav_sc0000704.1_g020.1.mk	Myb_box5_MYB	1.939	-665	-660
Pav_sc0000704.1_g020.1.mk	Myb_box1_MYB	2.0676	-712	-707
Gene	TF_Name	Z-Score	Start	End
Pav_sc0000704.1_g300.1.mk	Myb_box1_MYB	2.8893	-96	-91
Pav_sc0000704.1_g300.1.mk	Myb_box1_MYB	2.8893	-656	-651
Pav_sc0000704.1_g300.1.mk	W_box_WRKY	2.2404	-40	-35
Pav_sc0000704.1_g300.1.mk	G_box2_bZIP	2.1604	-316	-311
Pav_sc0000704.1_g300.1.mk	Myb_box3_MYB	2.161	-293	-288
Pav_sc0000704.1_g300.1.mk	Myb_box3_MYB	2.161	-267	-262
Pav_sc0000704.1_g300.1.mk	Myb_box5_MYB	2.877	-96	-91
Pav_sc0000704.1_g300.1.mk	Myb_box5_MYB	2.877	-656	-651
Gene	TF_Name	Z-Score	Start	End
Pav_sc0000704.1_g350.1.mk	Myb_box5_MYB	1.9825	-658	-653
Pav_sc0000704.1_g350.1.mk	Myb_box5_MYB	1.9825	-660	-655
Pav_sc0000704.1_g350.1.mk	G_box2_bZIP	2.3002	-860	-855
Pav_sc0000704.1_g350.1.mk	N_box_bHLH	2.6579	-94	-89
Pav_sc0000704.1_g350.1.mk	Myb_box3_MYB	2.0361	-640	-635
Pav_sc0000704.1_g350.1.mk	AuxRE_ARF	2.597	-615	-610
Pav_sc0000704.1_g350.1.mk	W_box_WRKY	2.1303	-361	-356
Gene	TF_Name	Z-Score	Start	End
Pav_sc0000747.1_g430.1.mk	DREB_AP2_EREBP	2.1856	-266	-261
Pav_sc0000747.1_g430.1.mk	Myb_box5_MYB	2.3228	-347	-342
Pav_sc0000747.1_g430.1.mk	Myb_box5_MYB	2.3228	-390	-385
Pav_sc0000747.1_g430.1.mk	Myb_box1_MYB	2.3909	-347	-342
Pav_sc0000747.1_g430.1.mk	Myb_box1_MYB	2.3909	-390	-385
Pav_sc0000747.1_g430.1.mk	Myb_box3_MYB	1.6857	-51	-46
Pav_sc0000747.1_g430.1.mk	GCC_box_AP2_EREBP	3.6142	-420	-415
Pav_sc0000747.1_g430.1.mk	AuxRE_ARF	2.1756	-827	-822
Pav_sc0000747.1_g430.1.mk	AuxRE_ARF	2.1756	-234	-229
Gene	TF_Name	Z-Score	Start	End
Pav_sc0000800.1_g740.1.mk	GCC_box_AP2_EREBP	3.5913	-830	-825
Pav_sc0000800.1_g740.1.mk	G_box_bHLH	2.6513	-949	-944
Pav_sc0000800.1_g740.1.mk	G_box_bHLH	2.6513	-871	-866
Pav_sc0000800.1_g740.1.mk	AuxRE_ARF	2.1995	-438	-433
Pav_sc0000800.1_g740.1.mk	Nac_box_NAC	2.1194	-984	-979
Pav_sc0000800.1_g740.1.mk	DREB_AP2_EREBP	2.7462	-814	-809
Gene	TF_Name	Z-Score	Start	End
Pav_sc0000800.1_g840.1.mk	DREB_AP2_EREBP	2.4903	-354	-349
Pav_sc0000800.1_g840.1.mk	Myb_box4_MYB	2.5022	-667	-661
Pav_sc0000800.1_g840.1.mk	AuxRE_ARF	2.6589	-706	-701
Pav_sc0000800.1_g840.1.mk	AuxRE_ARF	2.6589	-187	-182
Pav_sc0000800.1_g840.1.mk	AuxRE_ARF	2.6589	-184	-179
Pav_sc0000800.1_g840.1.mk	Myb_box2_MYB	2.6644	-615	-610
Pav_sc0000800.1_g840.1.mk	Myb_box2_MYB	2.6644	-954	-949
Pav_sc0000800.1_g840.1.mk	G_box2_bZIP	2.6904	-620	-615
Pav_sc0000800.1_g840.1.mk	Myb_box5_MYB	2.5847	-352	-347
Pav_sc0000800.1_g840.1.mk	Myb_box5_MYB	2.5847	-369	-364
Pav_sc0000800.1_g840.1.mk	Myb_box5_MYB	2.5847	-290	-285
Pav_sc0000800.1_g840.1.mk	Myb_box1_MYB	2.6721	-290	-285
Pav_sc0000800.1_g840.1.mk	Myb_box1_MYB	2.6721	-369	-364
Pav_sc0000800.1_g840.1.mk	G_box_bHLH	3.1316	-255	-250
Gene	TF_Name	Z-Score	Start	End
Pav_sc0000800.1_g1610.1.mk	N_box_bHLH	2.5696	-282	-277
Pav_sc0000800.1_g1610.1.mk	N_box_bHLH	2.5696	-675	-670
Pav_sc0000800.1_g1610.1.mk	AuxRE_ARF	2.5181	-755	-750
Pav_sc0000800.1_g1610.1.mk	Myb_box5_MYB	2.6498	-340	-335
Pav_sc0000800.1_g1610.1.mk	Myb_box2_MYB	2.4839	-517	-512
Gene	TF_Name	Z-Score	Start	End
Pav_sc0000852.1_g900.1.mk	G_box_bHLH	3.5668	-766	-761
Pav_sc0000852.1_g900.1.mk	AuxRE_ARF	2.8169	-252	-247
Pav_sc0000852.1_g900.1.mk	AuxRE_ARF	2.8169	-541	-536
Pav_sc0000852.1_g900.1.mk	Myb_box4_MYB	2.9293	-29	-23
Gene	TF_Name	Z-Score	Start	End
Pav_sc0000890.1_g190.1.br	Myb_box1_MYB	2.8295	-182	-177
Pav_sc0000890.1_g190.1.br	AuxRE_ARF	2.7302	-53	-48
Pav_sc0000890.1_g190.1.br	AuxRE_ARF	2.7302	-50	-45
Pav_sc0000890.1_g190.1.br	N_box_bHLH	2.6299	-890	-885
Pav_sc0000890.1_g190.1.br	DREB_AP2_EREBP	2.6076	-216	-211
Pav_sc0000890.1_g190.1.br	W_box_WRKY	2.1428	-758	-753
Pav_sc0000890.1_g190.1.br	Myb_box4_MYB	2.5836	-639	-633
Pav_sc0000890.1_g190.1.br	Myb_box5_MYB	2.7361	-182	-177
Gene	TF_Name	Z-Score	Start	End
Pav_sc0000890.1_g790.1.mk	DREB_AP2_EREBP	2.2961	-501	-496
Pav_sc0000890.1_g790.1.mk	Nac_box_NAC	2.3198	-880	-875
Pav_sc0000890.1_g790.1.mk	Myb_box1_MYB	2.4388	-340	-335
Pav_sc0000890.1_g790.1.mk	Myb_box1_MYB	2.4388	-930	-925
Pav_sc0000890.1_g790.1.mk	Myb_box1_MYB	2.4388	-928	-923
Pav_sc0000890.1_g790.1.mk	Myb_box1_MYB	2.4388	-893	-888
Pav_sc0000890.1_g790.1.mk	W_box_WRKY	1.8504	-182	-177
Pav_sc0000890.1_g790.1.mk	Myb_box5_MYB	2.4135	-930	-925
Pav_sc0000890.1_g790.1.mk	Myb_box5_MYB	2.4135	-340	-335
Pav_sc0000890.1_g790.1.mk	Myb_box5_MYB	2.4135	-928	-923
Pav_sc0000890.1_g790.1.mk	Myb_box5_MYB	2.4135	-99	-94
Pav_sc0000890.1_g790.1.mk	Myb_box5_MYB	2.4135	-893	-888
Pav_sc0000890.1_g790.1.mk	G_box_bHLH	2.8257	-572	-567
Gene	TF_Name	Z-Score	Start	End
Pav_sc0000890.1_g910.1.mk	Myb_box1_MYB	1.6306	-211	-206
Pav_sc0000890.1_g910.1.mk	W_box_WRKY	1.6648	-390	-385
Pav_sc0000890.1_g910.1.mk	G_box2_bZIP	1.6323	-104	-99
Pav_sc0000890.1_g910.1.mk	Myb_box2_MYB	2.0822	-867	-862
Pav_sc0000890.1_g910.1.mk	Myb_box2_MYB	2.0822	-476	-471
Pav_sc0000890.1_g910.1.mk	Myb_box4_MYB	2.0066	-481	-475
Pav_sc0000890.1_g910.1.mk	Myb_box5_MYB	2.2507	-464	-459
Pav_sc0000890.1_g910.1.mk	Myb_box5_MYB	2.2507	-554	-549
Pav_sc0000890.1_g910.1.mk	Myb_box3_MYB	1.6422	-965	-960
Pav_sc0000890.1_g910.1.mk	N_box_bHLH	2.1511	-82	-77
Gene	TF_Name	Z-Score	Start	End
Pav_sc0000890.1_g1220.1.br	Myb_box5_MYB	1.95	-86	-81
Pav_sc0000890.1_g1220.1.br	G_ABRE_bZIP	3.4785	-464	-457
Pav_sc0000890.1_g1220.1.br	G_box1_bZIP	3.8493	-465	-458
Pav_sc0000890.1_g1220.1.br	G_box_bHLH	3.1732	-464	-459
Pav_sc0000890.1_g1220.1.br	G_box_bHLH	3.1732	-779	-774
Pav_sc0000890.1_g1220.1.br	Myb_box1_MYB	2.0607	-86	-81
Pav_sc0000890.1_g1220.1.br	Nac_box_NAC	2.6332	-641	-636
Pav_sc0000890.1_g1220.1.br	Nac_box_NAC	2.6332	-745	-740
Pav_sc0000890.1_g1220.1.br	Nac_box_NAC	2.6332	-635	-630
Pav_sc0000890.1_g1220.1.br	Nac_box_NAC	2.6332	-703	-698
Gene	TF_Name	Z-Score	Start	End
Pav_sc0000890.1_g1260.1.mk	Myb_box4_MYB	2.6456	-26	-20
Pav_sc0000890.1_g1260.1.mk	Nac_box_NAC	2.6734	-889	-884
Pav_sc0000890.1_g1260.1.mk	Myb_box5_MYB	2.0091	-914	-909
Pav_sc0000890.1_g1260.1.mk	Myb_box5_MYB	2.0091	-940	-935
Pav_sc0000890.1_g1260.1.mk	Myb_box5_MYB	2.0091	-671	-666
Pav_sc0000890.1_g1260.1.mk	Myb_box5_MYB	2.0091	-928	-923
Pav_sc0000890.1_g1260.1.mk	Myb_box5_MYB	2.0091	-24	-19
Pav_sc0000890.1_g1260.1.mk	Myb_box5_MYB	2.0091	-912	-907
Pav_sc0000890.1_g1260.1.mk	Myb_box5_MYB	2.0091	-204	-199
Pav_sc0000890.1_g1260.1.mk	Myb_box1_MYB	2.0893	-912	-907
Pav_sc0000890.1_g1260.1.mk	Myb_box1_MYB	2.0893	-671	-666
Pav_sc0000890.1_g1260.1.mk	Myb_box1_MYB	2.0893	-204	-199
Gene	TF_Name	Z-Score	Start	End
Pav_sc0000975.1_g210.1.mk	Nac_box_NAC	2.7376	-690	-685
Pav_sc0000975.1_g210.1.mk	Myb_box3_MYB	2.0562	-179	-174
Pav_sc0000975.1_g210.1.mk	W_box_WRKY	2.1134	-859	-854
Pav_sc0000975.1_g210.1.mk	Myb_box5_MYB	1.9015	-589	-584
Pav_sc0000975.1_g210.1.mk	Myb_box5_MYB	1.9015	-991	-986
Pav_sc0000975.1_g210.1.mk	Myb_box5_MYB	1.9015	-475	-470
Pav_sc0000975.1_g210.1.mk	AuxRE_ARF	2.6687	-409	-404
Gene	TF_Name	Z-Score	Start	End
Pav_sc0000983.1_g340.1.mk	Myb_box1_MYB	2.5528	-930	-925
Pav_sc0000983.1_g340.1.mk	Myb_box5_MYB	2.4567	-930	-925
Pav_sc0000983.1_g340.1.mk	Myb_box5_MYB	2.4567	-313	-308
Pav_sc0000983.1_g340.1.mk	Myb_box2_MYB	2.4421	-312	-307
Pav_sc0000983.1_g340.1.mk	Myb_box2_MYB	2.4421	-811	-806
Pav_sc0000983.1_g340.1.mk	W_box_WRKY	1.9267	-479	-474
Pav_sc0000983.1_g340.1.mk	Nac_box_NAC	2.5217	-242	-237
Pav_sc0000983.1_g340.1.mk	C_ABRE_bZIP	3.4546	-698	-693
Pav_sc0000983.1_g340.1.mk	DREB_AP2_EREBP	2.3856	-246	-241
Gene	TF_Name	Z-Score	Start	End
Pav_sc0001175.1_g140.1.mk	Myb_box3_MYB	2.0436	-732	-727
Pav_sc0001175.1_g140.1.mk	Myb_box3_MYB	2.0436	-999	-994
Pav_sc0001175.1_g140.1.mk	Myb_box1_MYB	2.7874	-485	-480
Pav_sc0001175.1_g140.1.mk	Myb_box5_MYB	2.6935	-485	-480
Pav_sc0001175.1_g140.1.mk	N_box_bHLH	2.6263	-835	-830
Pav_sc0001175.1_g140.1.mk	W_box_WRKY	2.0932	-584	-579
Pav_sc0001175.1_g140.1.mk	W_box_WRKY	2.0932	-187	-182
Pav_sc0001175.1_g140.1.mk	W_box_WRKY	2.0932	-676	-671
Pav_sc0001175.1_g140.1.mk	G_box_bHLH	3.2202	-858	-853
Gene	TF_Name	Z-Score	Start	End
Pav_sc0001275.1_g660.1.mk	DREB_AP2_EREBP	2.7874	-265	-260
Pav_sc0001275.1_g660.1.mk	Myb_box4_MYB	2.1515	-204	-198
Pav_sc0001275.1_g660.1.mk	Myb_box4_MYB	2.1515	-117	-111
Pav_sc0001275.1_g660.1.mk	Myb_box5_MYB	2.3079	-185	-180
Pav_sc0001275.1_g660.1.mk	G_ABRE_bZIP	2.4625	-352	-345
Pav_sc0001275.1_g660.1.mk	Myb_box2_MYB	2.2648	-174	-169
Pav_sc0001275.1_g660.1.mk	Myb_box2_MYB	2.2648	-961	-956
Pav_sc0001275.1_g660.1.mk	G_box2_bZIP	2.3376	-282	-277
Pav_sc0001275.1_g660.1.mk	N_box_bHLH	2.8077	-166	-161
Gene	TF_Name	Z-Score	Start	End
Pav_sc0001341.1_g310.1.mk	AuxRE_ARF	2.7754	-447	-442
Pav_sc0001341.1_g310.1.mk	Myb_box1_MYB	2.8268	-419	-414
Pav_sc0001341.1_g310.1.mk	Myb_box5_MYB	2.7177	-419	-414
Pav_sc0001341.1_g310.1.mk	N_box_bHLH	3.2754	-416	-411
Pav_sc0001341.1_g310.1.mk	W_box_WRKY	2.206	-950	-945
Gene	TF_Name	Z-Score	Start	End
Pav_sc0001341.1_g540.1.mk	Myb_box5_MYB	2.0861	-652	-647
Pav_sc0001341.1_g540.1.mk	Myb_box5_MYB	2.0861	-930	-925
Pav_sc0001341.1_g540.1.mk	Myb_box5_MYB	2.0861	-456	-451
Pav_sc0001341.1_g540.1.mk	GCC_box_AP2_EREBP	4.2927	-140	-135
Pav_sc0001341.1_g540.1.mk	W_box_WRKY	1.5717	-757	-752
Pav_sc0001341.1_g540.1.mk	W_box_WRKY	1.5717	-92	-87
Pav_sc0001341.1_g540.1.mk	Myb_box3_MYB	2.2024	-495	-490
Pav_sc0001341.1_g540.1.mk	AuxRE_ARF	2.7996	-330	-325
Gene	TF_Name	Z-Score	Start	End
Pav_sc0001502.1_g510.1.mk	DREB_AP2_EREBP	2.4086	-276	-271
Pav_sc0001502.1_g510.1.mk	Myb_box5_MYB	2.5106	-139	-134
Pav_sc0001502.1_g510.1.mk	GCC_box_AP2_EREBP	3.795	-136	-131
Pav_sc0001502.1_g510.1.mk	G_box_bHLH	3.0228	-357	-352
Gene	TF_Name	Z-Score	Start	End
Pav_sc0001781.1_g140.1.mk	N_box_bHLH	2.6347	-217	-212
Pav_sc0001781.1_g140.1.mk	G_box_bHLH	3.138	-952	-947
Gene	TF_Name	Z-Score	Start	End
Pav_sc0001925.1_g220.1.mk	G_box2_bZIP	1.7565	-768	-763
Pav_sc0001925.1_g220.1.mk	C_ABRE_bZIP	3.3669	-153	-148
Pav_sc0001925.1_g220.1.mk	Myb_box4_MYB	2.1061	-93	-87
Pav_sc0001925.1_g220.1.mk	Myb_box2_MYB	2.1446	-188	-183
Pav_sc0001925.1_g220.1.mk	Myb_box5_MYB	2.3151	-118	-113
Pav_sc0001925.1_g220.1.mk	Myb_box3_MYB	1.7653	-656	-651
Pav_sc0001925.1_g220.1.mk	N_box_bHLH	2.8191	-357	-352
Gene	TF_Name	Z-Score	Start	End
Pav_sc0001938.1_g520.1.mk	G_box2_bZIP	2.3696	-640	-635
Pav_sc0001938.1_g520.1.mk	Myb_box5_MYB	2.2747	-634	-629
Pav_sc0001938.1_g520.1.mk	Myb_box5_MYB	2.2747	-807	-802
Pav_sc0001938.1_g520.1.mk	Myb_box5_MYB	2.2747	-738	-733
Pav_sc0001938.1_g520.1.mk	Myb_box1_MYB	2.3596	-738	-733
Pav_sc0001938.1_g520.1.mk	Myb_box1_MYB	2.3596	-807	-802
Pav_sc0001938.1_g520.1.mk	Nac_box_NAC	3.0001	-759	-754
Pav_sc0001938.1_g520.1.mk	W_box_WRKY	2.4386	-617	-612
Gene	TF_Name	Z-Score	Start	End
Pav_sc0002001.1_g150.1.br	W_box_WRKY	2.2977	-546	-541
Pav_sc0002001.1_g150.1.br	W_box_WRKY	2.2977	-662	-657
Pav_sc0002001.1_g150.1.br	Nac_box_NAC	2.8825	-821	-816
Pav_sc0002001.1_g150.1.br	Nac_box_NAC	2.8825	-243	-238
Pav_sc0002001.1_g150.1.br	Myb_box5_MYB	2.851	-609	-604
Pav_sc0002001.1_g150.1.br	Myb_box1_MYB	2.9384	-609	-604
Pav_sc0002001.1_g150.1.br	Myb_box2_MYB	2.8801	-691	-686
Gene	TF_Name	Z-Score	Start	End
Pav_sc0002207.1_g430.1.mk	AuxRE_ARF	2.7297	-475	-470
Pav_sc0002207.1_g430.1.mk	DREB_AP2_EREBP	2.6306	-363	-358
Pav_sc0002207.1_g430.1.mk	DREB_AP2_EREBP	2.6306	-880	-875
Pav_sc0002207.1_g430.1.mk	Nac_box_NAC	2.8264	-981	-976
Pav_sc0002207.1_g430.1.mk	Myb_box5_MYB	2.7188	-190	-185
Pav_sc0002207.1_g430.1.mk	Myb_box3_MYB	2.1205	-674	-669
Pav_sc0002207.1_g430.1.mk	N_box_bHLH	3.2862	-866	-861
Pav_sc0002207.1_g430.1.mk	Myb_box1_MYB	2.8562	-190	-185
Gene	TF_Name	Z-Score	Start	End
Pav_sc0002375.1_g190.1.mk	Myb_box4_MYB	2.705	-616	-610
Pav_sc0002375.1_g190.1.mk	G_box2_bZIP	2.0944	-483	-478
Pav_sc0002375.1_g190.1.mk	AuxRE_ARF	2.6989	-19	-14
Pav_sc0002375.1_g190.1.mk	GCC_box_AP2_EREBP	4.3782	-852	-847
Gene	TF_Name	Z-Score	Start	End
Pav_sc0002828.1_g250.1.br	Myb_box5_MYB	1.7084	-7	-2
Pav_sc0002828.1_g250.1.br	Myb_box5_MYB	1.7084	-21	-16
Pav_sc0002828.1_g250.1.br	Myb_box1_MYB	1.8047	-21	-16
Pav_sc0002828.1_g250.1.br	N_box_bHLH	2.7739	-107	-102
Pav_sc0002828.1_g250.1.br	N_box_bHLH	2.7739	-24	-19
Pav_sc0002828.1_g250.1.br	N_box_bHLH	2.7739	-722	-717
Pav_sc0002828.1_g250.1.br	DREB_AP2_EREBP	2.7563	-525	-520
Pav_sc0002828.1_g250.1.br	DREB_AP2_EREBP	2.7563	-286	-281
Gene	TF_Name	Z-Score	Start	End
Pav_sc0003135.1_g610.1.mk	W_box_WRKY	1.5414	-988	-983
Pav_sc0003135.1_g610.1.mk	W_box_WRKY	1.5414	-22	-17
Pav_sc0003135.1_g610.1.mk	Myb_box5_MYB	2.1299	-519	-514
Pav_sc0003135.1_g610.1.mk	Myb_box2_MYB	2.8509	-754	-749
Pav_sc0003135.1_g610.1.mk	G_box_bHLH	3.4546	-152	-147
Gene	TF_Name	Z-Score	Start	End
Pav_sc0003189.1_g120.1.mk	Myb_box1_MYB	1.866	-516	-511
Pav_sc0003189.1_g120.1.mk	Myb_box1_MYB	1.866	-310	-305
Pav_sc0003189.1_g120.1.mk	Myb_box4_MYB	2.4597	-24	-18
Pav_sc0003189.1_g120.1.mk	Myb_box5_MYB	1.7921	-516	-511
Pav_sc0003189.1_g120.1.mk	Myb_box5_MYB	1.7921	-843	-838
Pav_sc0003189.1_g120.1.mk	Myb_box5_MYB	1.7921	-310	-305
Pav_sc0003189.1_g120.1.mk	Myb_box5_MYB	1.7921	-178	-173
Pav_sc0003189.1_g120.1.mk	Myb_box5_MYB	1.7921	-779	-774
Pav_sc0003189.1_g120.1.mk	W_box_WRKY	1.8778	-189	-184
Pav_sc0003189.1_g120.1.mk	Myb_box2_MYB	2.5272	-842	-837
Pav_sc0003189.1_g120.1.mk	G_box_bHLH	3.0908	-163	-158
Gene	TF_Name	Z-Score	Start	End
Pav_sc0003492.1_g030.1.mk	DREB_AP2_EREBP	2.999	-415	-410
Pav_sc0003492.1_g030.1.mk	AuxRE_ARF	2.8265	-153	-148
Pav_sc0003492.1_g030.1.mk	AuxRE_ARF	2.8265	-85	-80
Pav_sc0003492.1_g030.1.mk	Myb_box3_MYB	2.2905	-779	-774
Pav_sc0003492.1_g030.1.mk	Myb_box1_MYB	1.5446	-779	-774
Pav_sc0003492.1_g030.1.mk	W_box_WRKY	1.5562	-113	-108
Pav_sc0003492.1_g030.1.mk	Myb_box5_MYB	2.254	-95	-90
Pav_sc0003492.1_g030.1.mk	Myb_box5_MYB	2.254	-627	-622
Pav_sc0003492.1_g030.1.mk	Nac_box_NAC	2.9886	-900	-895
Gene	TF_Name	Z-Score	Start	End
Pav_sc0003562.1_g430.1.br	Myb_box2_MYB	2.7161	-151	-146
Pav_sc0003562.1_g430.1.br	Myb_box3_MYB	1.9425	-137	-132
Pav_sc0003562.1_g430.1.br	Myb_box5_MYB	1.8475	-915	-910
Pav_sc0003562.1_g430.1.br	Myb_box5_MYB	1.8475	-351	-346
Gene	TF_Name	Z-Score	Start	End
Pav_sc0003562.1_g440.1.mk	Myb_box5_MYB	1.8198	-189	-184
Pav_sc0003562.1_g440.1.mk	Myb_box5_MYB	1.8198	-268	-263
Pav_sc0003562.1_g440.1.mk	Myb_box4_MYB	2.2828	-750	-744
Pav_sc0003562.1_g440.1.mk	Myb_box4_MYB	2.2828	-251	-245
Pav_sc0003562.1_g440.1.mk	W_box_WRKY	1.9915	-137	-132
Pav_sc0003562.1_g440.1.mk	Myb_box1_MYB	1.9492	-189	-184
Pav_sc0003562.1_g440.1.mk	DREB_AP2_EREBP	2.9712	-20	-15
Gene	TF_Name	Z-Score	Start	End
Pav_sc0008321.1_g040.1.mk	Myb_box3_MYB	2.1372	-165	-160
Pav_sc0008321.1_g040.1.mk	Myb_box1_MYB	2.1501	-55	-50
Pav_sc0008321.1_g040.1.mk	Myb_box5_MYB	2.0647	-55	-50
Pav_sc0008321.1_g040.1.mk	Myb_box5_MYB	2.0647	-62	-57
Pav_sc0008321.1_g040.1.mk	G_box2_bZIP	2.1392	-542	-537
Pav_sc0008321.1_g040.1.mk	HSE1_HSF	1.588	-754	-747
Pav_sc0008321.1_g040.1.mk	HSE1_HSF	1.588	-758	-751
Pav_sc0008321.1_g040.1.mk	HSE1_HSF	1.588	-749	-742
Gene	TF_Name	Z-Score	Start	End
Pav_sc0010639.1_g010.1.br	HBE_HB	1.5321	-751	-743
Pav_sc0010639.1_g010.1.br	Myb_box1_MYB	2.1693	-615	-610
Pav_sc0010639.1_g010.1.br	Myb_box5_MYB	2.807	-795	-790
Pav_sc0010639.1_g010.1.br	DREB_AP2_EREBP	2.7257	-793	-788

## Sheet: P. bretschneideri
Gene	TF_Name	Z-Score	Start	End
Pbr000107.1	Myb_box1_MYB	2.8142	-773	-768
Pbr000107.1	GCC_box_AP2_EREBP	4.2328	-312	-307
Pbr000107.1	Myb_box2_MYB	2.687	-304	-299
Pbr000107.1	Myb_box2_MYB	2.687	-929	-924
Pbr000107.1	Myb_box2_MYB	2.687	-351	-346
Pbr000107.1	Myb_box3_MYB	2.0281	-412	-407
Pbr000107.1	W_box_WRKY	2.0909	-944	-939
Pbr000107.1	Nac_box_NAC	2.7257	-683	-678
Pbr000107.1	Myb_box5_MYB	2.7395	-773	-768
Pbr000107.1	AuxRE_ARF	2.6345	-14	-9
Pbr000107.1	AuxRE_ARF	2.6345	-22	-17
Pbr000107.1	AuxRE_ARF	2.6345	-267	-262
Gene	TF_Name	Z-Score	Start	End
Pbr000122.1	DREB_AP2_EREBP	2.3028	-594	-589
Pbr000122.1	G_box2_bZIP	2.4127	-352	-347
Pbr000122.1	G_box2_bZIP	2.4127	-340	-335
Pbr000122.1	W_box_WRKY	1.7935	-938	-933
Pbr000122.1	G_box_bHLH	2.8491	-898	-893
Gene	TF_Name	Z-Score	Start	End
Pbr000171.1	Nac_box_NAC	2.4106	-323	-318
Pbr000171.1	G_box2_bZIP	1.8409	-99	-94
Pbr000171.1	Myb_box2_MYB	2.6342	-445	-440
Pbr000171.1	Myb_box1_MYB	1.8665	-862	-857
Pbr000171.1	Myb_box1_MYB	1.8665	-726	-721
Pbr000171.1	G_box_bHLH	2.9437	-867	-862
Pbr000171.1	G_box_bHLH	2.9437	-833	-828
Pbr000171.1	N_box_bHLH	2.399	-369	-364
Pbr000171.1	G_ABRE_bZIP	3.1841	-867	-860
Pbr000171.1	Myb_box3_MYB	1.8718	-229	-224
Pbr000171.1	Myb_box3_MYB	1.8718	-898	-893
Pbr000171.1	Myb_box5_MYB	1.8102	-862	-857
Pbr000171.1	Myb_box5_MYB	1.8102	-726	-721
Pbr000171.1	Myb_box5_MYB	1.8102	-444	-439
Gene	TF_Name	Z-Score	Start	End
Pbr000192.1	Myb_box1_MYB	1.5474	-114	-109
Pbr000192.1	W_box_WRKY	1.5963	-170	-165
Pbr000192.1	W_box_WRKY	1.5963	-784	-779
Pbr000192.1	Myb_box3_MYB	2.299	-114	-109
Pbr000192.1	Myb_box5_MYB	3.0214	-704	-699
Pbr000192.1	AuxRE_ARF	2.8657	-148	-143
Pbr000192.1	AuxRE_ARF	2.8657	-524	-519
Gene	TF_Name	Z-Score	Start	End
Pbr000436.1	AuxRE_ARF	2.6507	-490	-485
Pbr000436.1	G_box2_bZIP	2.1035	-383	-378
Gene	TF_Name	Z-Score	Start	End
Pbr001361.1	Myb_box5_MYB	1.9963	-34	-29
Pbr001361.1	Myb_box5_MYB	1.9963	-105	-100
Pbr001361.1	N_box_bHLH	2.7014	-453	-448
Pbr001361.1	N_box_bHLH	2.7014	-333	-328
Pbr001361.1	N_box_bHLH	2.7014	-541	-536
Pbr001361.1	Myb_box1_MYB	2.0933	-34	-29
Pbr001361.1	Myb_box3_MYB	2.0633	-576	-571
Pbr001361.1	G_box2_bZIP	2.0837	-901	-896
Gene	TF_Name	Z-Score	Start	End
Pbr001409.1	AuxRE_ARF	3.0985	-25	-20
Pbr001409.1	G_box_bHLH	3.654	-396	-391
Pbr001409.1	Nac_box_NAC	3.0789	-677	-672
Pbr001409.1	G_box2_bZIP	2.3922	-313	-308
Gene	TF_Name	Z-Score	Start	End
Pbr001425.1	Myb_box5_MYB	2.2254	-130	-125
Pbr001425.1	Myb_box5_MYB	2.2254	-40	-35
Pbr001425.1	Myb_box2_MYB	2.9832	-39	-34
Pbr001425.1	G_box2_bZIP	2.4108	-953	-948
Pbr001425.1	W_box_WRKY	2.4569	-813	-808
Gene	TF_Name	Z-Score	Start	End
Pbr001823.1	Myb_box3_MYB	2.1835	-743	-738
Pbr001823.1	Myb_box2_MYB	2.7304	-12	-7
Pbr001823.1	Myb_box2_MYB	2.7304	-260	-255
Gene	TF_Name	Z-Score	Start	End
Pbr001857.2	Myb_box3_MYB	2.5672	-332	-327
Pbr001857.2	Myb_box1_MYB	1.8541	-332	-327
Pbr001857.2	W_box_WRKY	2.6795	-481	-476
Pbr001857.2	W_box_WRKY	2.6795	-40	-35
Pbr001857.2	Myb_box2_MYB	3.4675	-994	-989
Pbr001857.2	Myb_box5_MYB	3.3054	-995	-990
Gene	TF_Name	Z-Score	Start	End
Pbr001878.1	Nac_box_NAC	2.6717	-694	-689
Pbr001878.1	N_box_bHLH	2.7814	-865	-860
Pbr001878.1	Myb_box5_MYB	2.0583	-225	-220
Gene	TF_Name	Z-Score	Start	End
Pbr002398.1	Nac_box_NAC	3.0042	-482	-477
Pbr002398.1	W_box_WRKY	2.4474	-513	-508
Pbr002398.1	Myb_box5_MYB	2.9941	-982	-977
Pbr002398.1	DREB_AP2_EREBP	2.9422	-58	-53
Pbr002398.1	Myb_box1_MYB	3.081	-982	-977
Pbr002398.1	Myb_box2_MYB	3.1089	-33	-28
Pbr002398.1	C_ABRE_bZIP	4.1004	-68	-63
Gene	TF_Name	Z-Score	Start	End
Pbr002439.1	AuxRE_ARF	2.4577	-348	-343
Gene	TF_Name	Z-Score	Start	End
Pbr002460.1	Myb_box1_MYB	2.1886	-213	-208
Pbr002460.1	Nac_box_NAC	2.7336	-181	-176
Pbr002460.1	Myb_box5_MYB	2.1174	-213	-208
Pbr002460.1	Myb_box5_MYB	2.1174	-885	-880
Pbr002460.1	Myb_box5_MYB	2.1174	-663	-658
Gene	TF_Name	Z-Score	Start	End
Pbr002519.1	Myb_box2_MYB	2.9195	-316	-311
Pbr002519.1	Myb_box5_MYB	2.1882	-678	-673
Pbr002519.1	Myb_box5_MYB	2.1882	-355	-350
Pbr002519.1	HSE1_HSF	1.6814	-175	-168
Pbr002519.1	AuxRE_ARF	2.7309	-98	-93
Gene	TF_Name	Z-Score	Start	End
Pbr002691.1	Myb_box4_MYB	2.8172	-126	-120
Pbr002691.1	Myb_box4_MYB	2.8172	-795	-789
Pbr002691.1	Myb_box5_MYB	2.225	-258	-253
Pbr002691.1	Myb_box5_MYB	2.225	-985	-980
Pbr002691.1	Myb_box5_MYB	2.225	-587	-582
Pbr002691.1	Myb_box5_MYB	2.225	-251	-246
Pbr002691.1	Myb_box5_MYB	2.225	-547	-542
Pbr002691.1	Myb_box2_MYB	2.9878	-115	-110
Pbr002691.1	Myb_box1_MYB	2.3695	-985	-980
Pbr002691.1	HSE1_HSF	1.8416	-713	-706
Pbr002691.1	Nac_box_NAC	3.0676	-801	-796
Pbr002691.1	Myb_box3_MYB	2.3487	-906	-901
Pbr002691.1	Myb_box3_MYB	2.3487	-303	-298
Pbr002691.1	Myb_box3_MYB	2.3487	-932	-927
Pbr002691.1	Myb_box3_MYB	2.3487	-916	-911
Gene	TF_Name	Z-Score	Start	End
Pbr002731.1	N_box_bHLH	2.2052	-248	-243
Pbr002731.1	N_box_bHLH	2.2052	-810	-805
Pbr002731.1	N_box_bHLH	2.2052	-176	-171
Pbr002731.1	Myb_box3_MYB	1.7146	-576	-571
Pbr002731.1	G_box_bHLH	2.7811	-193	-188
Pbr002731.1	GCC_box_AP2_EREBP	3.6237	-317	-312
Pbr002731.1	GCC_box_AP2_EREBP	3.6237	-318	-313
Pbr002731.1	GCC_box_AP2_EREBP	3.6237	-320	-315
Pbr002731.1	Myb_box4_MYB	2.3018	-721	-715
Gene	TF_Name	Z-Score	Start	End
Pbr003272.1	Myb_box5_MYB	1.8694	-814	-809
Pbr003272.1	Myb_box2_MYB	2.7364	-100	-95
Pbr003272.1	Myb_box2_MYB	2.7364	-627	-622
Pbr003272.1	Nac_box_NAC	2.5286	-985	-980
Gene	TF_Name	Z-Score	Start	End
Pbr003660.1	Myb_box5_MYB	2.0897	-845	-840
Pbr003660.1	Myb_box5_MYB	2.0897	-792	-787
Pbr003660.1	Myb_box5_MYB	2.0897	-25	-20
Pbr003660.1	DREB_AP2_EREBP	3.5722	-879	-874
Pbr003660.1	HSE1_HSF	1.5927	-163	-156
Pbr003660.1	Nac_box_NAC	2.8879	-676	-671
Pbr003660.1	G_box_bHLH	3.49	-117	-112
Pbr003660.1	AuxRE_ARF	2.7889	-937	-932
Pbr003660.1	AuxRE_ARF	2.7889	-963	-958
Gene	TF_Name	Z-Score	Start	End
Pbr003814.1	Nac_box_NAC	2.6579	-272	-267
Pbr003814.1	Nac_box_NAC	2.6579	-854	-849
Pbr003814.1	Myb_box5_MYB	1.7926	-231	-226
Pbr003814.1	Myb_box5_MYB	1.7926	-836	-831
Gene	TF_Name	Z-Score	Start	End
Pbr003860.1	DREB_AP2_EREBP	2.3684	-14	-9
Pbr003860.1	Myb_box5_MYB	2.4831	-878	-873
Pbr003860.1	Nac_box_NAC	2.4051	-488	-483
Pbr003860.1	Nac_box_NAC	2.4051	-907	-902
Pbr003860.1	Nac_box_NAC	2.4051	-957	-952
Pbr003860.1	N_box_bHLH	2.3801	-667	-662
Pbr003860.1	Myb_box1_MYB	1.8195	-880	-875
Pbr003860.1	Myb_box1_MYB	1.8195	-977	-972
Gene	TF_Name	Z-Score	Start	End
Pbr004204.1	Myb_box1_MYB	3.3348	-511	-506
Pbr004204.1	Myb_box3_MYB	2.4983	-568	-563
Pbr004204.1	Myb_box5_MYB	3.3624	-511	-506
Gene	TF_Name	Z-Score	Start	End
Pbr004257.1	Myb_box5_MYB	2.7689	-198	-193
Pbr004257.1	Myb_box2_MYB	2.8696	-199	-194
Pbr004257.1	Myb_box3_MYB	2.0598	-876	-871
Pbr004257.1	Myb_box1_MYB	2.0718	-931	-926
Pbr004257.1	W_box_WRKY	2.1481	-999	-994
Pbr004257.1	G_box2_bZIP	2.0582	-384	-379
Gene	TF_Name	Z-Score	Start	End
Pbr004301.1	Myb_box2_MYB	2.6539	-898	-893
Pbr004301.1	HSE1_HSF	1.5137	-365	-358
Pbr004301.1	Myb_box1_MYB	2.1015	-985	-980
Pbr004301.1	Myb_box1_MYB	2.1015	-93	-88
Pbr004301.1	Myb_box5_MYB	1.9903	-985	-980
Pbr004301.1	Myb_box5_MYB	1.9903	-93	-88
Pbr004301.1	Myb_box5_MYB	1.9903	-933	-928
Pbr004301.1	Myb_box5_MYB	1.9903	-529	-524
Gene	TF_Name	Z-Score	Start	End
Pbr004315.1	G_box_bHLH	2.8834	-301	-296
Pbr004315.1	N_box_bHLH	2.3205	-264	-259
Pbr004315.1	DREB_AP2_EREBP	2.8887	-341	-336
Pbr004315.1	GCC_box_AP2_EREBP	3.6309	-339	-334
Pbr004315.1	G_box2_bZIP	1.8105	-586	-581
Gene	TF_Name	Z-Score	Start	End
Pbr005312.1	W_box_WRKY	2.4449	-621	-616
Pbr005312.1	DREB_AP2_EREBP	3.0253	-748	-743
Pbr005312.1	Nac_box_NAC	3.0422	-784	-779
Gene	TF_Name	Z-Score	Start	End
Pbr005477.1	Myb_box5_MYB	1.7922	-360	-355
Pbr005477.1	Myb_box5_MYB	1.7922	-557	-552
Pbr005477.1	Myb_box5_MYB	1.7922	-532	-527
Pbr005477.1	Myb_box5_MYB	1.7922	-358	-353
Pbr005477.1	Myb_box1_MYB	1.9495	-557	-552
Pbr005477.1	G_box_bHLH	3.2101	-239	-234
Pbr005477.1	AuxRE_ARF	2.5977	-838	-833
Pbr005477.1	AuxRE_ARF	2.5977	-806	-801
Pbr005477.1	DREB_AP2_EREBP	2.5193	-891	-886
Pbr005477.1	DREB_AP2_EREBP	2.5193	-56	-51
Pbr005477.1	DREB_AP2_EREBP	2.5193	-524	-519
Pbr005477.1	Myb_box2_MYB	2.505	-630	-625
Pbr005477.1	Myb_box3_MYB	1.9596	-899	-894
Gene	TF_Name	Z-Score	Start	End
Pbr005478.1	DREB_AP2_EREBP	3.7287	-478	-473
Pbr005478.1	Myb_box1_MYB	2.381	-643	-638
Pbr005478.1	W_box_WRKY	1.6211	-808	-803
Pbr005478.1	W_box_WRKY	1.6211	-786	-781
Pbr005478.1	W_box_WRKY	1.6211	-704	-699
Pbr005478.1	W_box_WRKY	1.6211	-726	-721
Pbr005478.1	Myb_box3_MYB	2.327	-226	-221
Pbr005478.1	Myb_box5_MYB	2.3604	-643	-638
Pbr005478.1	AuxRE_ARF	2.8442	-544	-539
Gene	TF_Name	Z-Score	Start	End
Pbr005504.1	Myb_box3_MYB	2.2049	-584	-579
Pbr005504.1	Myb_box2_MYB	2.7383	-190	-185
Pbr005504.1	Myb_box2_MYB	2.7383	-425	-420
Pbr005504.1	Myb_box2_MYB	2.7383	-206	-201
Pbr005504.1	N_box_bHLH	3.3873	-140	-135
Pbr005504.1	Myb_box1_MYB	2.2202	-727	-722
Pbr005504.1	G_box2_bZIP	2.9583	-232	-227
Pbr005504.1	G_box2_bZIP	2.9583	-135	-130
Pbr005504.1	Myb_box5_MYB	2.068	-727	-722
Pbr005504.1	Myb_box5_MYB	2.068	-127	-122
Gene	TF_Name	Z-Score	Start	End
Pbr005576.1	Myb_box5_MYB	2.9766	-797	-792
Pbr005576.1	Myb_box2_MYB	2.8004	-350	-345
Pbr005576.1	Myb_box3_MYB	2.2141	-980	-975
Pbr005576.1	AuxRE_ARF	2.7392	-111	-106
Gene	TF_Name	Z-Score	Start	End
Pbr005664.1	Myb_box5_MYB	2.9455	-191	-186
Pbr005664.1	Myb_box3_MYB	2.2322	-527	-522
Pbr005664.1	W_box_WRKY	1.5629	-808	-803
Pbr005664.1	Myb_box1_MYB	2.9995	-191	-186
Pbr005664.1	G_box_bHLH	3.4432	-377	-372
Pbr005664.1	Nac_box_NAC	2.866	-451	-446
Pbr005664.1	Myb_box2_MYB	2.971	-492	-487
Gene	TF_Name	Z-Score	Start	End
Pbr005812.3	G_box2_bZIP	2.1414	-170	-165
Pbr005812.3	W_box_WRKY	2.2097	-50	-45
Pbr005812.3	N_box_bHLH	2.7269	-900	-895
Pbr005812.3	Myb_box5_MYB	2.0624	-584	-579
Pbr005812.3	Myb_box5_MYB	2.0624	-423	-418
Pbr005812.3	Myb_box5_MYB	2.0624	-144	-139
Pbr005812.3	Myb_box1_MYB	2.1398	-584	-579
Pbr005812.3	Myb_box1_MYB	2.1398	-423	-418
Pbr005812.3	HSE1_HSF	1.6057	-38	-31
Pbr005812.3	Nac_box_NAC	2.7295	-838	-833
Pbr005812.3	Myb_box2_MYB	2.9358	-400	-395
Gene	TF_Name	Z-Score	Start	End
Pbr005891.1	Myb_box5_MYB	1.8034	-325	-320
Pbr005891.1	Myb_box5_MYB	1.8034	-904	-899
Pbr005891.1	Myb_box5_MYB	1.8034	-120	-115
Pbr005891.1	Myb_box5_MYB	1.8034	-991	-986
Pbr005891.1	GCC_box_AP2_EREBP	3.9177	-224	-219
Pbr005891.1	Myb_box1_MYB	1.9104	-904	-899
Pbr005891.1	Nac_box_NAC	2.5205	-332	-327
Pbr005891.1	C_ABRE_bZIP	3.5484	-912	-907
Pbr005891.1	G_box2_bZIP	1.8819	-230	-225
Pbr005891.1	W_box_WRKY	1.9131	-398	-393
Gene	TF_Name	Z-Score	Start	End
Pbr005955.1	Myb_box1_MYB	1.9504	-582	-577
Pbr005955.1	Myb_box3_MYB	1.9437	-15	-10
Pbr005955.1	Myb_box4_MYB	2.3214	-636	-630
Pbr005955.1	Myb_box5_MYB	1.7908	-580	-575
Pbr005955.1	Myb_box5_MYB	1.7908	-475	-470
Pbr005955.1	Myb_box5_MYB	1.7908	-582	-577
Gene	TF_Name	Z-Score	Start	End
Pbr005965.1	Myb_box5_MYB	1.8556	-871	-866
Pbr005965.1	W_box_WRKY	2.0348	-53	-48
Pbr005965.1	G_box2_bZIP	1.932	-853	-848
Pbr005965.1	G_box_bHLH	3.0311	-97	-92
Pbr005965.1	G_box_bHLH	3.0311	-126	-121
Pbr005965.1	AuxRE_ARF	2.5005	-174	-169
Gene	TF_Name	Z-Score	Start	End
Pbr006144.1	Myb_box1_MYB	2.6485	-949	-944
Pbr006144.1	N_box_bHLH	3.046	-185	-180
Pbr006144.1	Myb_box3_MYB	1.99	-871	-866
Pbr006144.1	AuxRE_ARF	2.5257	-33	-28
Pbr006144.1	AuxRE_ARF	2.5257	-45	-40
Pbr006144.1	AuxRE_ARF	2.5257	-40	-35
Pbr006144.1	Myb_box5_MYB	2.5407	-949	-944
Gene	TF_Name	Z-Score	Start	End
Pbr006166.1	Myb_box1_MYB	2.718	-956	-951
Pbr006166.1	Myb_box3_MYB	2.0173	-590	-585
Pbr006166.1	Myb_box5_MYB	2.667	-956	-951
Pbr006166.1	C_ABRE_bZIP	3.578	-906	-901
Pbr006166.1	AuxRE_ARF	2.5641	-444	-439
Gene	TF_Name	Z-Score	Start	End
Pbr006206.1	AuxRE_ARF	2.8268	-236	-231
Pbr006206.1	Myb_box4_MYB	3.0162	-809	-803
Pbr006206.1	Myb_box1_MYB	1.5919	-305	-300
Pbr006206.1	Myb_box3_MYB	2.2995	-305	-300
Gene	TF_Name	Z-Score	Start	End
Pbr006221.1	Myb_box1_MYB	2.3121	-327	-322
Pbr006221.1	Myb_box5_MYB	2.2256	-327	-322
Gene	TF_Name	Z-Score	Start	End
Pbr006563.1	Myb_box5_MYB	2.9119	-693	-688
Pbr006563.1	G_box2_bZIP	2.2374	-165	-160
Pbr006563.1	Myb_box3_MYB	2.2019	-272	-267
Pbr006563.1	Myb_box3_MYB	2.2019	-468	-463
Pbr006563.1	Myb_box1_MYB	2.2312	-784	-779
Pbr006563.1	Nac_box_NAC	2.8938	-361	-356
Pbr006563.1	Myb_box2_MYB	2.7672	-747	-742
Gene	TF_Name	Z-Score	Start	End
Pbr006883.1	C_ABRE_bZIP	3.3175	-241	-236
Pbr006883.1	C_ABRE_bZIP	3.3175	-165	-160
Pbr006883.1	C_ABRE_bZIP	3.3175	-694	-689
Pbr006883.1	W_box_WRKY	1.8125	-335	-330
Pbr006883.1	Nac_box_NAC	2.389	-524	-519
Pbr006883.1	AuxRE_ARF	2.2729	-235	-230
Pbr006883.1	AuxRE_ARF	2.2729	-21	-16
Pbr006883.1	N_box_bHLH	2.3184	-43	-38
Pbr006883.1	Myb_box1_MYB	1.8105	-131	-126
Pbr006883.1	Myb_box1_MYB	1.8105	-25	-20
Pbr006883.1	Myb_box1_MYB	1.8105	-573	-568
Pbr006883.1	Myb_box1_MYB	1.8105	-654	-649
Pbr006883.1	Myb_box5_MYB	1.6876	-131	-126
Pbr006883.1	Myb_box5_MYB	1.6876	-36	-31
Pbr006883.1	Myb_box5_MYB	1.6876	-25	-20
Pbr006883.1	Myb_box5_MYB	1.6876	-654	-649
Pbr006883.1	Myb_box5_MYB	1.6876	-573	-568
Pbr006883.1	Myb_box5_MYB	1.6876	-133	-128
Pbr006883.1	G_box_bHLH	2.8474	-168	-163
Pbr006883.1	G_box2_bZIP	2.4378	-255	-250
Pbr006883.1	Myb_box4_MYB	2.2109	-157	-151
Gene	TF_Name	Z-Score	Start	End
Pbr007318.1	DREB_AP2_EREBP	2.452	-914	-909
Pbr007318.1	GCC_box_AP2_EREBP	3.2493	-71	-66
Pbr007318.1	GCC_box_AP2_EREBP	3.2493	-718	-713
Pbr007318.1	GCC_box_AP2_EREBP	3.2493	-988	-983
Pbr007318.1	GCC_box_AP2_EREBP	3.2493	-575	-570
Pbr007318.1	GCC_box_AP2_EREBP	3.2493	-627	-622
Gene	TF_Name	Z-Score	Start	End
Pbr007389.1	N_box_bHLH	3.2556	-83	-78
Pbr007389.1	Myb_box5_MYB	2.7353	-959	-954
Gene	TF_Name	Z-Score	Start	End
Pbr007494.1	Myb_box1_MYB	2.0411	-146	-141
Pbr007494.1	Myb_box3_MYB	2.0348	-258	-253
Pbr007494.1	Myb_box5_MYB	1.9683	-146	-141
Pbr007494.1	Myb_box5_MYB	1.9683	-73	-68
Pbr007494.1	Myb_box5_MYB	1.9683	-493	-488
Pbr007494.1	Myb_box5_MYB	1.9683	-43	-38
Pbr007494.1	Myb_box5_MYB	1.9683	-474	-469
Pbr007494.1	Nac_box_NAC	2.6172	-586	-581
Pbr007494.1	Nac_box_NAC	2.6172	-506	-501
Gene	TF_Name	Z-Score	Start	End
Pbr008167.1	DREB_AP2_EREBP	3.0478	-94	-89
Pbr008167.1	Myb_box2_MYB	2.358	-203	-198
Pbr008167.1	Myb_box2_MYB	2.358	-122	-117
Pbr008167.1	Myb_box2_MYB	2.358	-198	-193
Pbr008167.1	Myb_box2_MYB	2.358	-331	-326
Pbr008167.1	Myb_box5_MYB	2.5405	-197	-192
Pbr008167.1	Myb_box5_MYB	2.5405	-121	-116
Pbr008167.1	Myb_box1_MYB	1.9839	-272	-267
Pbr008167.1	Myb_box1_MYB	1.9839	-966	-961
Gene	TF_Name	Z-Score	Start	End
Pbr008232.1	Myb_box2_MYB	2.7886	-491	-486
Pbr008232.1	Myb_box4_MYB	2.8022	-649	-643
Pbr008232.1	N_box_bHLH	2.8411	-422	-417
Pbr008232.1	Myb_box5_MYB	2.1109	-765	-760
Pbr008232.1	Myb_box5_MYB	2.1109	-492	-487
Pbr008232.1	Myb_box5_MYB	2.1109	-898	-893
Pbr008232.1	Myb_box5_MYB	2.1109	-647	-642
Pbr008232.1	Myb_box5_MYB	2.1109	-893	-888
Pbr008232.1	AuxRE_ARF	2.7907	-19	-14
Pbr008232.1	DREB_AP2_EREBP	2.8147	-62	-57
Pbr008232.1	DREB_AP2_EREBP	2.8147	-895	-890
Pbr008232.1	Myb_box3_MYB	2.2206	-271	-266
Pbr008232.1	Myb_box3_MYB	2.2206	-218	-213
Pbr008232.1	GCC_box_AP2_EREBP	4.3696	-137	-132
Gene	TF_Name	Z-Score	Start	End
Pbr008265.1	Myb_box5_MYB	1.8145	-668	-663
Pbr008265.1	G_box_bHLH	3.0922	-715	-710
Pbr008265.1	DREB_AP2_EREBP	2.4886	-131	-126
Gene	TF_Name	Z-Score	Start	End
Pbr008278.1	Myb_box2_MYB	2.9243	-256	-251
Pbr008278.1	G_box_bHLH	3.5388	-133	-128
Pbr008278.1	Nac_box_NAC	3.0069	-543	-538
Pbr008278.1	Myb_box5_MYB	2.1542	-721	-716
Pbr008278.1	Myb_box5_MYB	2.1542	-495	-490
Pbr008278.1	Myb_box5_MYB	2.1542	-739	-734
Pbr008278.1	Myb_box1_MYB	2.2867	-721	-716
Pbr008278.1	W_box_WRKY	1.5796	-205	-200
Pbr008278.1	N_box_bHLH	3.5461	-224	-219
Gene	TF_Name	Z-Score	Start	End
Pbr008293.1	Myb_box3_MYB	2.1189	-346	-341
Pbr008293.1	N_box_bHLH	3.2745	-877	-872
Pbr008293.1	G_box1_bZIP	3.8734	-112	-105
Pbr008293.1	G_box_bHLH	3.2356	-111	-106
Pbr008293.1	G_ABRE_bZIP	3.4941	-111	-104
Pbr008293.1	Myb_box1_MYB	2.1405	-815	-810
Pbr008293.1	Myb_box5_MYB	2.7416	-105	-100
Pbr008293.1	Myb_box2_MYB	2.7045	-104	-99
Pbr008293.1	AuxRE_ARF	2.6106	-23	-18
Gene	TF_Name	Z-Score	Start	End
Pbr008319.1	Myb_box5_MYB	2.2647	-249	-244
Pbr008319.1	Myb_box5_MYB	2.2647	-727	-722
Pbr008319.1	Myb_box5_MYB	2.2647	-247	-242
Pbr008319.1	W_box_WRKY	1.7971	-708	-703
Pbr008319.1	W_box_WRKY	1.7971	-306	-301
Pbr008319.1	AuxRE_ARF	3.2072	-659	-654
Gene	TF_Name	Z-Score	Start	End
Pbr008337.2	G_box2_bZIP	2.5401	-483	-478
Pbr008337.2	HSE1_HSF	1.9857	-554	-547
Pbr008337.2	Myb_box1_MYB	2.5	-192	-187
Pbr008337.2	Myb_box1_MYB	2.5	-827	-822
Pbr008337.2	Myb_box5_MYB	2.404	-361	-356
Pbr008337.2	Myb_box5_MYB	2.404	-192	-187
Pbr008337.2	Myb_box5_MYB	2.404	-827	-822
Pbr008337.2	W_box_WRKY	1.8223	-367	-362
Pbr008337.2	W_box_WRKY	1.8223	-411	-406
Gene	TF_Name	Z-Score	Start	End
Pbr008539.1	G_box_bHLH	2.9218	-287	-282
Pbr008539.1	G_box1_bZIP	3.5037	-288	-281
Pbr008539.1	Myb_box4_MYB	2.2969	-179	-173
Pbr008539.1	G_ABRE_bZIP	3.1801	-287	-280
Gene	TF_Name	Z-Score	Start	End
Pbr009123.1	Myb_box5_MYB	2.0818	-919	-914
Pbr009123.1	Myb_box5_MYB	2.0818	-925	-920
Pbr009123.1	Myb_box5_MYB	2.0818	-535	-530
Pbr009123.1	Myb_box5_MYB	2.0818	-921	-916
Pbr009123.1	Myb_box5_MYB	2.0818	-923	-918
Pbr009123.1	Myb_box4_MYB	2.4835	-886	-880
Pbr009123.1	Myb_box2_MYB	2.4646	-536	-531
Pbr009123.1	Myb_box2_MYB	2.4646	-922	-917
Gene	TF_Name	Z-Score	Start	End
Pbr009210.1	GCC_box_AP2_EREBP	3.868	-975	-970
Pbr009210.1	Myb_box2_MYB	2.4703	-826	-821
Pbr009210.1	Myb_box2_MYB	2.4703	-668	-663
Pbr009210.1	Myb_box5_MYB	2.5932	-966	-961
Pbr009210.1	Nac_box_NAC	2.5797	-460	-455
Pbr009210.1	Myb_box3_MYB	1.9561	-898	-893
Pbr009210.1	Myb_box4_MYB	2.3851	-991	-985
Gene	TF_Name	Z-Score	Start	End
Pbr009280.1	Myb_box2_MYB	3.0498	-520	-515
Pbr009280.1	Nac_box_NAC	2.9579	-880	-875
Pbr009280.1	W_box_WRKY	1.5035	-633	-628
Pbr009280.1	HBE_HB	2.3221	-829	-821
Gene	TF_Name	Z-Score	Start	End
Pbr009288.1	Myb_box3_MYB	2.3601	-303	-298
Pbr009288.1	Myb_box3_MYB	2.3601	-962	-957
Pbr009288.1	Myb_box3_MYB	2.3601	-946	-941
Pbr009288.1	Myb_box3_MYB	2.3601	-936	-931
Pbr009288.1	Nac_box_NAC	3.0681	-831	-826
Pbr009288.1	HSE1_HSF	1.8468	-713	-706
Pbr009288.1	Myb_box4_MYB	2.8148	-126	-120
Pbr009288.1	Myb_box4_MYB	2.8148	-825	-819
Pbr009288.1	Myb_box2_MYB	2.9877	-115	-110
Pbr009288.1	Myb_box1_MYB	1.6263	-303	-298
Pbr009288.1	Myb_box1_MYB	1.6263	-962	-957
Pbr009288.1	Myb_box1_MYB	1.6263	-946	-941
Pbr009288.1	Myb_box1_MYB	1.6263	-936	-931
Pbr009288.1	Myb_box5_MYB	2.2326	-258	-253
Pbr009288.1	Myb_box5_MYB	2.2326	-587	-582
Pbr009288.1	Myb_box5_MYB	2.2326	-251	-246
Pbr009288.1	Myb_box5_MYB	2.2326	-547	-542
Gene	TF_Name	Z-Score	Start	End
Pbr009294.1	Myb_box1_MYB	2.6581	-32	-27
Pbr009294.1	Myb_box3_MYB	2.6113	-536	-531
Pbr009294.1	Myb_box3_MYB	2.6113	-154	-149
Pbr009294.1	W_box_WRKY	1.8829	-411	-406
Pbr009294.1	Myb_box4_MYB	3.3891	-631	-625
Pbr009294.1	AuxRE_ARF	3.3914	-36	-31
Pbr009294.1	Myb_box5_MYB	2.5202	-629	-624
Pbr009294.1	Myb_box5_MYB	2.5202	-32	-27
Pbr009294.1	Myb_box5_MYB	2.5202	-342	-337
Pbr009294.1	N_box_bHLH	4.097	-62	-57
Gene	TF_Name	Z-Score	Start	End
Pbr009529.1	DREB_AP2_EREBP	2.9347	-827	-822
Pbr009529.1	G_box_bHLH	3.6164	-713	-708
Pbr009529.1	G_box2_bZIP	3.0979	-661	-656
Pbr009529.1	Myb_box5_MYB	2.2131	-325	-320
Pbr009529.1	Myb_box5_MYB	2.2131	-105	-100
Pbr009529.1	Myb_box5_MYB	2.2131	-378	-373
Pbr009529.1	Myb_box5_MYB	2.2131	-237	-232
Pbr009529.1	W_box_WRKY	2.4142	-189	-184
Gene	TF_Name	Z-Score	Start	End
Pbr009571.1	W_box_WRKY	2.1883	-569	-564
Pbr009571.1	Myb_box5_MYB	2.8386	-553	-548
Pbr009571.1	N_box_bHLH	2.7698	-912	-907
Gene	TF_Name	Z-Score	Start	End
Pbr010169.1	Myb_box1_MYB	2.2007	-391	-386
Pbr010169.1	Myb_box1_MYB	2.2007	-862	-857
Pbr010169.1	W_box_WRKY	2.2695	-920	-915
Pbr010169.1	Myb_box5_MYB	2.1177	-391	-386
Pbr010169.1	Myb_box5_MYB	2.1177	-862	-857
Pbr010169.1	Myb_box5_MYB	2.1177	-356	-351
Gene	TF_Name	Z-Score	Start	End
Pbr010510.1	N_box_bHLH	2.5562	-929	-924
Pbr010510.1	N_box_bHLH	2.5562	-893	-888
Pbr010510.1	Myb_box5_MYB	1.9487	-456	-451
Pbr010510.1	Myb_box5_MYB	1.9487	-623	-618
Pbr010510.1	C_ABRE_bZIP	3.5735	-694	-689
Pbr010510.1	G_box_bHLH	3.1195	-684	-679
Pbr010510.1	G_box2_bZIP	2.7031	-680	-675
Pbr010510.1	AuxRE_ARF	2.5861	-16	-11
Pbr010510.1	AuxRE_ARF	2.5861	-959	-954
Pbr010510.1	Myb_box3_MYB	2.052	-640	-635
Pbr010510.1	Myb_box1_MYB	2.0472	-456	-451
Gene	TF_Name	Z-Score	Start	End
Pbr010542.1	Myb_box1_MYB	2.5078	-845	-840
Pbr010542.1	N_box_bHLH	3.1115	-891	-886
Pbr010542.1	Myb_box5_MYB	2.3703	-271	-266
Pbr010542.1	Myb_box5_MYB	2.3703	-845	-840
Gene	TF_Name	Z-Score	Start	End
Pbr010589.1	AuxRE_ARF	2.4063	-901	-896
Pbr010589.1	Myb_box5_MYB	1.798	-491	-486
Pbr010589.1	Myb_box5_MYB	1.798	-231	-226
Pbr010589.1	Myb_box5_MYB	1.798	-233	-228
Pbr010589.1	G_box2_bZIP	2.5912	-249	-244
Pbr010589.1	Myb_box2_MYB	2.6178	-581	-576
Pbr010589.1	W_box_WRKY	1.9145	-657	-652
Pbr010589.1	Myb_box1_MYB	1.8722	-491	-486
Gene	TF_Name	Z-Score	Start	End
Pbr010638.1	C_ABRE_bZIP	4.3398	-448	-443
Pbr010638.1	Myb_box2_MYB	3.0606	-802	-797
Pbr010638.1	Myb_box2_MYB	3.0606	-513	-508
Pbr010638.1	Nac_box_NAC	3.0744	-732	-727
Pbr010638.1	Myb_box1_MYB	1.5868	-792	-787
Pbr010638.1	HSE1_HSF	1.8736	-657	-650
Pbr010638.1	Myb_box3_MYB	2.3549	-792	-787
Pbr010638.1	Myb_box5_MYB	2.2569	-958	-953
Pbr010638.1	Myb_box5_MYB	2.2569	-227	-222
Pbr010638.1	Myb_box5_MYB	2.2569	-39	-34
Gene	TF_Name	Z-Score	Start	End
Pbr010799.1	DREB_AP2_EREBP	2.7323	-398	-393
Pbr010799.1	G_box_bHLH	3.3566	-751	-746
Pbr010799.1	G_box2_bZIP	2.1697	-604	-599
Gene	TF_Name	Z-Score	Start	End
Pbr010809.1	G_box1_bZIP	3.1433	-225	-218
Pbr010809.1	G_box2_bZIP	1.6355	-932	-927
Pbr010809.1	W_box_WRKY	1.7216	-378	-373
Pbr010809.1	Myb_box5_MYB	1.5611	-411	-406
Pbr010809.1	N_box_bHLH	2.6809	-152	-147
Pbr010809.1	G_box_bHLH	2.6106	-224	-219
Pbr010809.1	G_box_bHLH	2.6106	-339	-334
Pbr010809.1	Nac_box_NAC	2.1666	-928	-923
Gene	TF_Name	Z-Score	Start	End
Pbr010812.1	DREB_AP2_EREBP	2.583	-392	-387
Pbr010812.1	Myb_box5_MYB	1.9165	-67	-62
Pbr010812.1	Myb_box5_MYB	1.9165	-310	-305
Pbr010812.1	Myb_box5_MYB	1.9165	-873	-868
Pbr010812.1	Myb_box5_MYB	1.9165	-444	-439
Pbr010812.1	Myb_box5_MYB	1.9165	-680	-675
Pbr010812.1	Myb_box5_MYB	1.9165	-286	-281
Pbr010812.1	Myb_box1_MYB	2.0615	-67	-62
Pbr010812.1	AuxRE_ARF	2.5991	-268	-263
Pbr010812.1	AuxRE_ARF	2.5991	-265	-260
Pbr010812.1	Myb_box2_MYB	2.6046	-309	-304
Pbr010812.1	Myb_box2_MYB	2.6046	-618	-613
Gene	TF_Name	Z-Score	Start	End
Pbr010843.1	N_box_bHLH	2.3338	-464	-459
Pbr010843.1	N_box_bHLH	2.3338	-381	-376
Pbr010843.1	GCC_box_AP2_EREBP	3.7361	-21	-16
Pbr010843.1	GCC_box_AP2_EREBP	3.7361	-18	-13
Pbr010843.1	GCC_box_AP2_EREBP	3.7361	-20	-15
Pbr010843.1	Myb_box5_MYB	1.7114	-556	-551
Pbr010843.1	Myb_box5_MYB	1.7114	-499	-494
Pbr010843.1	Myb_box5_MYB	1.7114	-327	-322
Pbr010843.1	Myb_box5_MYB	1.7114	-329	-324
Pbr010843.1	Myb_box5_MYB	1.7114	-935	-930
Pbr010843.1	Myb_box3_MYB	1.8281	-273	-268
Pbr010843.1	Myb_box3_MYB	1.8281	-775	-770
Pbr010843.1	Myb_box3_MYB	1.8281	-687	-682
Pbr010843.1	AuxRE_ARF	2.3198	-105	-100
Pbr010843.1	DREB_AP2_EREBP	2.9596	-23	-18
Pbr010843.1	Myb_box1_MYB	1.8323	-327	-322
Pbr010843.1	Myb_box1_MYB	1.8323	-935	-930
Pbr010843.1	W_box_WRKY	1.8546	-446	-441
Gene	TF_Name	Z-Score	Start	End
Pbr010852.1	Myb_box2_MYB	2.4473	-583	-578
Pbr010852.1	Myb_box2_MYB	2.4473	-425	-420
Pbr010852.1	Myb_box2_MYB	2.4473	-442	-437
Pbr010852.1	Myb_box5_MYB	2.5804	-358	-353
Pbr010852.1	Myb_box5_MYB	2.5804	-435	-430
Pbr010852.1	Myb_box5_MYB	2.5804	-356	-351
Pbr010852.1	Myb_box1_MYB	2.7254	-356	-351
Pbr010852.1	Myb_box4_MYB	2.3504	-78	-72
Pbr010852.1	Myb_box4_MYB	2.3504	-484	-478
Pbr010852.1	G_box2_bZIP	2.729	-334	-329
Pbr010852.1	DREB_AP2_EREBP	2.5139	-437	-432
Gene	TF_Name	Z-Score	Start	End
Pbr010897.1	N_box_bHLH	3.2277	-146	-141
Gene	TF_Name	Z-Score	Start	End
Pbr010905.1	DREB_AP2_EREBP	3.1713	-989	-984
Pbr010905.1	Myb_box5_MYB	2.3968	-82	-77
Pbr010905.1	Myb_box5_MYB	2.3968	-544	-539
Pbr010905.1	Myb_box3_MYB	2.5061	-446	-441
Pbr010905.1	Myb_box3_MYB	2.5061	-762	-757
Pbr010905.1	G_box_bHLH	3.8115	-564	-559
Pbr010905.1	G_box_bHLH	3.8115	-946	-941
Pbr010905.1	W_box_WRKY	2.5558	-100	-95
Pbr010905.1	Myb_box1_MYB	2.5339	-544	-539
Gene	TF_Name	Z-Score	Start	End
Pbr010910.1	Myb_box5_MYB	2.1008	-852	-847
Pbr010910.1	Myb_box5_MYB	2.1008	-270	-265
Pbr010910.1	AuxRE_ARF	2.5711	-809	-804
Pbr010910.1	G_box_bHLH	3.3356	-248	-243
Pbr010910.1	HBE_HB	1.5598	-694	-686
Pbr010910.1	HSE1_HSF	1.642	-639	-632
Gene	TF_Name	Z-Score	Start	End
Pbr010918.1	W_box_WRKY	1.6048	-263	-258
Pbr010918.1	Myb_box4_MYB	2.8529	-808	-802
Pbr010918.1	DREB_AP2_EREBP	2.9409	-811	-806
Pbr010918.1	Myb_box5_MYB	2.1988	-502	-497
Pbr010918.1	Myb_box5_MYB	2.1988	-662	-657
Pbr010918.1	Myb_box3_MYB	2.3208	-227	-222
Pbr010918.1	Myb_box3_MYB	2.3208	-794	-789
Pbr010918.1	Myb_box1_MYB	2.3505	-502	-497
Pbr010918.1	N_box_bHLH	2.931	-200	-195
Gene	TF_Name	Z-Score	Start	End
Pbr010989.1	G_box_bHLH	3.0802	-79	-74
Pbr010989.1	G_box_bHLH	3.0802	-90	-85
Pbr010989.1	G_box_bHLH	3.0802	-143	-138
Pbr010989.1	Myb_box5_MYB	1.8878	-375	-370
Gene	TF_Name	Z-Score	Start	End
Pbr011178.1	DREB_AP2_EREBP	2.7371	-985	-980
Pbr011178.1	Nac_box_NAC	2.6812	-160	-155
Pbr011178.1	Myb_box1_MYB	2.8995	-230	-225
Pbr011178.1	Myb_box5_MYB	2.8834	-230	-225
Pbr011178.1	Myb_box5_MYB	2.8834	-507	-502
Pbr011178.1	AuxRE_ARF	2.484	-730	-725
Gene	TF_Name	Z-Score	Start	End
Pbr011222.1	N_box_bHLH	2.6804	-223	-218
Pbr011222.1	Myb_box3_MYB	2.0998	-705	-700
Pbr011222.1	Myb_box5_MYB	2.7691	-626	-621
Pbr011222.1	W_box_WRKY	2.1926	-170	-165
Gene	TF_Name	Z-Score	Start	End
Pbr011494.1	G_ABRE_bZIP	2.7806	-422	-415
Pbr011494.1	Nac_box_NAC	2.503	-885	-880
Pbr011494.1	N_box_bHLH	3.1018	-996	-991
Pbr011494.1	Myb_box1_MYB	2.6084	-483	-478
Pbr011494.1	Myb_box1_MYB	2.6084	-338	-333
Pbr011494.1	G_box_bHLH	3.0321	-891	-886
Pbr011494.1	W_box_WRKY	1.9251	-496	-491
Pbr011494.1	Myb_box5_MYB	2.5733	-118	-113
Pbr011494.1	Myb_box5_MYB	2.5733	-483	-478
Pbr011494.1	Myb_box5_MYB	2.5733	-471	-466
Pbr011494.1	Myb_box5_MYB	2.5733	-338	-333
Pbr011494.1	Myb_box3_MYB	1.8765	-360	-355
Gene	TF_Name	Z-Score	Start	End
Pbr011497.1	Myb_box5_MYB	2.8402	-267	-262
Pbr011497.1	Myb_box3_MYB	2.1005	-55	-50
Pbr011497.1	Myb_box3_MYB	2.1005	-527	-522
Pbr011497.1	Myb_box3_MYB	2.1005	-555	-550
Pbr011497.1	Myb_box1_MYB	2.8882	-267	-262
Pbr011497.1	HBE_HB	2.1521	-553	-545
Gene	TF_Name	Z-Score	Start	End
Pbr011724.1	G_box2_bZIP	1.9717	-237	-232
Pbr011724.1	Myb_box3_MYB	1.9892	-542	-537
Pbr011724.1	Myb_box1_MYB	2.0013	-612	-607
Pbr011724.1	DREB_AP2_EREBP	3.1593	-213	-208
Pbr011724.1	Myb_box5_MYB	1.8971	-305	-300
Pbr011724.1	Myb_box5_MYB	1.8971	-612	-607
Gene	TF_Name	Z-Score	Start	End
Pbr011828.1	W_box_WRKY	2.1474	-103	-98
Pbr011828.1	Myb_box2_MYB	2.7912	-776	-771
Pbr011828.1	DREB_AP2_EREBP	3.3259	-380	-375
Pbr011828.1	DREB_AP2_EREBP	3.3259	-492	-487
Pbr011828.1	DREB_AP2_EREBP	3.3259	-452	-447
Pbr011828.1	Myb_box5_MYB	2.0501	-735	-730
Pbr011828.1	AuxRE_ARF	2.6088	-678	-673
Pbr011828.1	AuxRE_ARF	2.6088	-135	-130
Gene	TF_Name	Z-Score	Start	End
Pbr011919.2	Myb_box3_MYB	2.1072	-234	-229
Pbr011919.2	AuxRE_ARF	2.7424	-261	-256
Pbr011919.2	AuxRE_ARF	2.7424	-795	-790
Pbr011919.2	Myb_box5_MYB	2.8506	-863	-858
Pbr011919.2	Myb_box1_MYB	2.1204	-861	-856
Pbr011919.2	C_ABRE_bZIP	3.8516	-838	-833
Gene	TF_Name	Z-Score	Start	End
Pbr011934.4	Nac_box_NAC	2.7407	-113	-108
Pbr011934.4	Myb_box1_MYB	2.0487	-364	-359
Pbr011934.4	Myb_box1_MYB	2.0487	-921	-916
Pbr011934.4	G_box2_bZIP	2.0416	-24	-19
Pbr011934.4	Myb_box4_MYB	2.4416	-648	-642
Pbr011934.4	N_box_bHLH	2.5524	-687	-682
Pbr011934.4	Myb_box5_MYB	1.8851	-353	-348
Pbr011934.4	Myb_box5_MYB	1.8851	-921	-916
Pbr011934.4	Myb_box5_MYB	1.8851	-66	-61
Pbr011934.4	Myb_box5_MYB	1.8851	-364	-359
Pbr011934.4	C_ABRE_bZIP	3.7624	-20	-15
Pbr011934.4	Myb_box2_MYB	2.5235	-331	-326
Pbr011934.4	W_box_WRKY	2.0903	-317	-312
Gene	TF_Name	Z-Score	Start	End
Pbr012128.1	Nac_box_NAC	2.5727	-741	-736
Pbr012128.1	Nac_box_NAC	2.5727	-691	-686
Pbr012128.1	Myb_box2_MYB	2.6027	-281	-276
Pbr012128.1	Myb_box5_MYB	1.8654	-293	-288
Pbr012128.1	Myb_box5_MYB	1.8654	-29	-24
Pbr012128.1	Myb_box5_MYB	1.8654	-88	-83
Pbr012128.1	Myb_box5_MYB	1.8654	-839	-834
Pbr012128.1	N_box_bHLH	2.508	-800	-795
Pbr012128.1	Myb_box1_MYB	1.9833	-293	-288
Pbr012128.1	Myb_box1_MYB	1.9833	-88	-83
Pbr012128.1	Myb_box1_MYB	1.9833	-839	-834
Pbr012128.1	Myb_box3_MYB	1.9794	-299	-294
Gene	TF_Name	Z-Score	Start	End
Pbr012235.1	Myb_box1_MYB	1.9473	-790	-785
Pbr012235.1	Myb_box2_MYB	2.4565	-224	-219
Pbr012235.1	Myb_box5_MYB	1.8226	-790	-785
Pbr012235.1	AuxRE_ARF	2.4182	-75	-70
Pbr012235.1	W_box_WRKY	1.9599	-432	-427
Pbr012235.1	W_box_WRKY	1.9599	-931	-926
Gene	TF_Name	Z-Score	Start	End
Pbr012549.1	Nac_box_NAC	2.6489	-574	-569
Pbr012549.1	Nac_box_NAC	2.6489	-905	-900
Pbr012549.1	Myb_box1_MYB	2.0662	-158	-153
Pbr012549.1	Myb_box5_MYB	2.8062	-955	-950
Pbr012549.1	AuxRE_ARF	2.6779	-536	-531
Pbr012549.1	N_box_bHLH	2.6993	-139	-134
Pbr012549.1	W_box_WRKY	2.1573	-31	-26
Gene	TF_Name	Z-Score	Start	End
Pbr012652.1	Myb_box1_MYB	3.012	-770	-765
Pbr012652.1	W_box_WRKY	2.2759	-916	-911
Pbr012652.1	Myb_box3_MYB	2.1838	-706	-701
Pbr012652.1	Myb_box3_MYB	2.1838	-567	-562
Pbr012652.1	Myb_box3_MYB	2.1838	-969	-964
Pbr012652.1	Myb_box5_MYB	2.9863	-690	-685
Pbr012652.1	Myb_box5_MYB	2.9863	-770	-765
Pbr012652.1	N_box_bHLH	2.8339	-374	-369
Gene	TF_Name	Z-Score	Start	End
Pbr012660.1	G_box_bHLH	2.9528	-750	-745
Pbr012660.1	G_box_bHLH	2.9528	-916	-911
Pbr012660.1	GCC_box_AP2_EREBP	3.7125	-305	-300
Pbr012660.1	AuxRE_ARF	2.2933	-718	-713
Pbr012660.1	AuxRE_ARF	2.2933	-787	-782
Pbr012660.1	AuxRE_ARF	2.2933	-577	-572
Pbr012660.1	C_ABRE_bZIP	3.4461	-173	-168
Pbr012660.1	Myb_box5_MYB	1.7011	-81	-76
Pbr012660.1	Myb_box5_MYB	1.7011	-921	-916
Pbr012660.1	Myb_box5_MYB	1.7011	-923	-918
Pbr012660.1	Myb_box5_MYB	1.7011	-755	-750
Pbr012660.1	Myb_box5_MYB	1.7011	-284	-279
Pbr012660.1	Myb_box5_MYB	1.7011	-286	-281
Pbr012660.1	Myb_box5_MYB	1.7011	-69	-64
Pbr012660.1	Myb_box5_MYB	1.7011	-262	-257
Pbr012660.1	Myb_box5_MYB	1.7011	-288	-283
Pbr012660.1	G_box2_bZIP	1.8348	-981	-976
Pbr012660.1	N_box_bHLH	2.9768	-104	-99
Pbr012660.1	Myb_box1_MYB	1.8473	-284	-279
Pbr012660.1	Myb_box2_MYB	2.2919	-818	-813
Pbr012660.1	Myb_box2_MYB	2.2919	-289	-284
Pbr012660.1	Myb_box3_MYB	1.8371	-830	-825
Pbr012660.1	G_ABRE_bZIP	3.1955	-750	-743
Gene	TF_Name	Z-Score	Start	End
Pbr013013.1	Myb_box1_MYB	2.0446	-225	-220
Pbr013013.1	Myb_box5_MYB	1.9688	-225	-220
Pbr013013.1	Myb_box5_MYB	1.9688	-223	-218
Pbr013013.1	Myb_box5_MYB	1.9688	-53	-48
Pbr013013.1	Myb_box3_MYB	2.0457	-568	-563
Gene	TF_Name	Z-Score	Start	End
Pbr013018.1	AuxRE_ARF	2.6768	-136	-131
Pbr013018.1	Myb_box5_MYB	2.008	-305	-300
Pbr013018.1	Myb_box4_MYB	2.6502	-476	-470
Pbr013018.1	W_box_WRKY	2.1883	-76	-71
Pbr013018.1	W_box_WRKY	2.1883	-928	-923
Pbr013018.1	W_box_WRKY	2.1883	-799	-794
Pbr013018.1	G_box_bHLH	3.278	-516	-511
Pbr013018.1	G_box_bHLH	3.278	-519	-514
Pbr013018.1	N_box_bHLH	3.3339	-407	-402
Gene	TF_Name	Z-Score	Start	End
Pbr013070.1	Nac_box_NAC	2.7411	-237	-232
Pbr013070.1	HSE1_HSF	1.5255	-174	-167
Pbr013070.1	W_box_WRKY	2.1452	-759	-754
Pbr013070.1	W_box_WRKY	2.1452	-67	-62
Pbr013070.1	AuxRE_ARF	2.7372	-393	-388
Gene	TF_Name	Z-Score	Start	End
Pbr013178.1	Myb_box4_MYB	2.1809	-697	-691
Pbr013178.1	Myb_box4_MYB	2.1809	-170	-164
Pbr013178.1	Myb_box4_MYB	2.1809	-211	-205
Pbr013178.1	Myb_box4_MYB	2.1809	-239	-233
Pbr013178.1	Myb_box1_MYB	1.8911	-78	-73
Pbr013178.1	Myb_box5_MYB	1.705	-78	-73
Pbr013178.1	Myb_box5_MYB	1.705	-928	-923
Pbr013178.1	Myb_box2_MYB	2.3169	-102	-97
Pbr013178.1	Myb_box2_MYB	2.3169	-752	-747
Pbr013178.1	Nac_box_NAC	2.5466	-466	-461
Pbr013178.1	Nac_box_NAC	2.5466	-27	-22
Pbr013178.1	DREB_AP2_EREBP	2.3256	-388	-383
Gene	TF_Name	Z-Score	Start	End
Pbr013193.1	G_box_bHLH	3.4394	-64	-59
Pbr013193.1	Nac_box_NAC	2.8786	-59	-54
Pbr013193.1	Nac_box_NAC	2.8786	-54	-49
Pbr013193.1	Nac_box_NAC	2.8786	-206	-201
Pbr013193.1	Myb_box5_MYB	2.9077	-491	-486
Pbr013193.1	GCC_box_AP2_EREBP	4.398	-494	-489
Pbr013193.1	W_box_WRKY	1.5993	-22	-17
Gene	TF_Name	Z-Score	Start	End
Pbr013623.1	Myb_box3_MYB	2.1668	-703	-698
Pbr013623.1	Myb_box3_MYB	2.1668	-897	-892
Pbr013623.1	Myb_box5_MYB	2.0307	-721	-716
Pbr013623.1	AuxRE_ARF	2.7078	-118	-113
Pbr013623.1	AuxRE_ARF	2.7078	-147	-142
Pbr013623.1	AuxRE_ARF	2.7078	-330	-325
Pbr013623.1	Myb_box2_MYB	2.7354	-598	-593
Pbr013623.1	W_box_WRKY	2.1817	-68	-63
Pbr013623.1	Nac_box_NAC	2.9144	-19	-14
Gene	TF_Name	Z-Score	Start	End
Pbr013631.1	AuxRE_ARF	1.879	-81	-76
Pbr013631.1	W_box_WRKY	1.5154	-795	-790
Pbr013631.1	W_box_WRKY	1.5154	-825	-820
Pbr013631.1	C_ABRE_bZIP	2.8279	-663	-658
Pbr013631.1	N_box_bHLH	2.5491	-549	-544
Pbr013631.1	G_box_bHLH	2.4782	-756	-751
Gene	TF_Name	Z-Score	Start	End
Pbr013634.1	Myb_box3_MYB	2.039	-264	-259
Pbr013634.1	G_box_bHLH	3.2088	-855	-850
Pbr013634.1	Myb_box5_MYB	1.9227	-764	-759
Pbr013634.1	Myb_box5_MYB	1.9227	-219	-214
Pbr013634.1	Myb_box5_MYB	1.9227	-160	-155
Pbr013634.1	Myb_box1_MYB	2.0513	-160	-155
Pbr013634.1	Nac_box_NAC	2.6825	-879	-874
Gene	TF_Name	Z-Score	Start	End
Pbr013846.1	Myb_box5_MYB	1.825	-756	-751
Pbr013846.1	Myb_box5_MYB	1.825	-745	-740
Pbr013846.1	Myb_box5_MYB	1.825	-38	-33
Pbr013846.1	Myb_box5_MYB	1.825	-758	-753
Pbr013846.1	Myb_box5_MYB	1.825	-523	-518
Pbr013846.1	Myb_box5_MYB	1.825	-982	-977
Pbr013846.1	Myb_box5_MYB	1.825	-743	-738
Pbr013846.1	Myb_box5_MYB	1.825	-994	-989
Pbr013846.1	N_box_bHLH	2.5204	-787	-782
Pbr013846.1	Myb_box2_MYB	2.7516	-757	-752
Pbr013846.1	Myb_box1_MYB	1.9066	-523	-518
Pbr013846.1	Myb_box3_MYB	1.9045	-355	-350
Gene	TF_Name	Z-Score	Start	End
Pbr013924.1	GCC_box_AP2_EREBP	3.8553	-292	-287
Pbr013924.1	GCC_box_AP2_EREBP	3.8553	-294	-289
Pbr013924.1	DREB_AP2_EREBP	2.3493	-510	-505
Pbr013924.1	W_box_WRKY	1.9335	-93	-88
Pbr013924.1	W_box_WRKY	1.9335	-502	-497
Pbr013924.1	AuxRE_ARF	2.4652	-588	-583
Pbr013924.1	Myb_box2_MYB	2.398	-287	-282
Pbr013924.1	Myb_box5_MYB	1.6806	-321	-316
Pbr013924.1	Myb_box5_MYB	1.6806	-323	-318
Pbr013924.1	Myb_box4_MYB	2.2623	-381	-375
Pbr013924.1	C_ABRE_bZIP	3.4923	-256	-251
Gene	TF_Name	Z-Score	Start	End
Pbr014125.1	Myb_box3_MYB	1.6097	-507	-502
Pbr014125.1	Myb_box2_MYB	2.0802	-994	-989
Pbr014125.1	G_box_bHLH	2.5902	-616	-611
Pbr014125.1	G_box_bHLH	2.5902	-420	-415
Pbr014125.1	G_box2_bZIP	1.5739	-758	-753
Pbr014125.1	Myb_box1_MYB	1.5945	-830	-825
Pbr014125.1	GCC_box_AP2_EREBP	3.2239	-841	-836
Gene	TF_Name	Z-Score	Start	End
Pbr014223.1	Myb_box2_MYB	2.6076	-220	-215
Pbr014223.1	N_box_bHLH	3.0145	-204	-199
Pbr014223.1	DREB_AP2_EREBP	2.3708	-485	-480
Pbr014223.1	Myb_box5_MYB	2.4742	-228	-223
Gene	TF_Name	Z-Score	Start	End
Pbr014232.1	G_box2_bZIP	2.1752	-934	-929
Pbr014232.1	G_box2_bZIP	2.1752	-931	-926
Pbr014232.1	G_box_bHLH	2.6306	-832	-827
Pbr014232.1	Myb_box3_MYB	1.5786	-120	-115
Pbr014232.1	Myb_box2_MYB	2.0206	-766	-761
Pbr014232.1	GCC_box_AP2_EREBP	3.3281	-406	-401
Pbr014232.1	GCC_box_AP2_EREBP	3.3281	-412	-407
Pbr014232.1	GCC_box_AP2_EREBP	3.3281	-413	-408
Gene	TF_Name	Z-Score	Start	End
Pbr014310.1	HBE_HB	1.5813	-200	-192
Pbr014310.1	Myb_box5_MYB	2.7321	-287	-282
Pbr014310.1	HSE1_HSF	1.6545	-931	-924
Pbr014310.1	Myb_box1_MYB	2.878	-287	-282
Pbr014310.1	G_box2_bZIP	2.9023	-168	-163
Pbr014310.1	Myb_box4_MYB	2.6492	-71	-65
Gene	TF_Name	Z-Score	Start	End
Pbr014414.1	GCC_box_AP2_EREBP	4.0664	-882	-877
Pbr014414.1	GCC_box_AP2_EREBP	4.0664	-883	-878
Pbr014414.1	Myb_box5_MYB	1.8699	-696	-691
Pbr014414.1	Myb_box5_MYB	1.8699	-603	-598
Pbr014414.1	Myb_box5_MYB	1.8699	-987	-982
Pbr014414.1	AuxRE_ARF	2.6181	-257	-252
Pbr014414.1	Myb_box1_MYB	1.9773	-987	-982
Pbr014414.1	Myb_box2_MYB	2.6852	-604	-599
Gene	TF_Name	Z-Score	Start	End
Pbr014616.1	G_ABRE_bZIP	3.3291	-192	-185
Pbr014616.1	Myb_box5_MYB	2.5266	-491	-486
Pbr014616.1	Myb_box5_MYB	2.5266	-122	-117
Pbr014616.1	Myb_box4_MYB	2.3729	-641	-635
Pbr014616.1	C_ABRE_bZIP	3.5132	-674	-669
Pbr014616.1	GCC_box_AP2_EREBP	3.9119	-316	-311
Pbr014616.1	G_box_bHLH	3.0396	-192	-187
Pbr014616.1	N_box_bHLH	2.4078	-835	-830
Gene	TF_Name	Z-Score	Start	End
Pbr014661.1	Myb_box1_MYB	2.2731	-719	-714
Pbr014661.1	Nac_box_NAC	2.1563	-799	-794
Pbr014661.1	Myb_box5_MYB	2.2402	-719	-714
Pbr014661.1	AuxRE_ARF	2.0054	-54	-49
Pbr014661.1	AuxRE_ARF	2.0054	-57	-52
Pbr014661.1	G_box_bHLH	2.6164	-76	-71
Pbr014661.1	G_box2_bZIP	1.589	-80	-75
Pbr014661.1	GCC_box_AP2_EREBP	3.3619	-132	-127
Pbr014661.1	GCC_box_AP2_EREBP	3.3619	-133	-128
Gene	TF_Name	Z-Score	Start	End
Pbr014783.2	Nac_box_NAC	2.6669	-444	-439
Pbr014783.2	N_box_bHLH	2.6192	-501	-496
Pbr014783.2	Myb_box2_MYB	2.7326	-960	-955
Pbr014783.2	Myb_box5_MYB	1.9376	-912	-907
Pbr014783.2	Myb_box5_MYB	1.9376	-279	-274
Pbr014783.2	DREB_AP2_EREBP	2.6204	-181	-176
Gene	TF_Name	Z-Score	Start	End
Pbr014830.1	W_box_WRKY	2.3004	-170	-165
Pbr014830.1	Myb_box1_MYB	2.1851	-607	-602
Pbr014830.1	Myb_box5_MYB	2.0537	-945	-940
Pbr014830.1	Myb_box5_MYB	2.0537	-607	-602
Pbr014830.1	G_box2_bZIP	2.2192	-663	-658
Pbr014830.1	DREB_AP2_EREBP	2.7318	-173	-168
Gene	TF_Name	Z-Score	Start	End
Pbr014831.1	Myb_box5_MYB	1.981	-220	-215
Pbr014831.1	HSE1_HSF	1.5694	-517	-510
Pbr014831.1	G_box2_bZIP	2.1779	-273	-268
Pbr014831.1	Myb_box4_MYB	2.5913	-582	-576
Gene	TF_Name	Z-Score	Start	End
Pbr014858.1	Myb_box3_MYB	2.0869	-773	-768
Pbr014858.1	Myb_box3_MYB	2.0869	-572	-567
Pbr014858.1	HSE1_HSF	1.5174	-175	-168
Pbr014858.1	HSE1_HSF	1.5174	-551	-544
Gene	TF_Name	Z-Score	Start	End
Pbr015036.1	W_box_WRKY	2.0403	-374	-369
Pbr015036.1	C_ABRE_bZIP	3.4454	-791	-786
Pbr015036.1	C_ABRE_bZIP	3.4454	-704	-699
Pbr015036.1	Myb_box1_MYB	1.8447	-49	-44
Pbr015036.1	Myb_box1_MYB	1.8447	-182	-177
Pbr015036.1	Myb_box5_MYB	1.7691	-584	-579
Pbr015036.1	Myb_box5_MYB	1.7691	-49	-44
Pbr015036.1	Myb_box5_MYB	1.7691	-182	-177
Gene	TF_Name	Z-Score	Start	End
Pbr015095.1	Myb_box1_MYB	1.5135	-454	-449
Pbr015095.1	Myb_box1_MYB	1.5135	-285	-280
Pbr015095.1	Myb_box5_MYB	2.0919	-239	-234
Pbr015095.1	Myb_box3_MYB	2.2302	-454	-449
Pbr015095.1	Myb_box3_MYB	2.2302	-285	-280
Gene	TF_Name	Z-Score	Start	End
Pbr015152.1	W_box_WRKY	2.1241	-71	-66
Pbr015152.1	W_box_WRKY	2.1241	-78	-73
Pbr015152.1	W_box_WRKY	2.1241	-885	-880
Pbr015152.1	W_box_WRKY	2.1241	-349	-344
Pbr015152.1	Myb_box2_MYB	2.7539	-720	-715
Pbr015152.1	AuxRE_ARF	2.6543	-500	-495
Pbr015152.1	Nac_box_NAC	2.7129	-292	-287
Pbr015152.1	G_box2_bZIP	2.0856	-354	-349
Pbr015152.1	Myb_box1_MYB	2.8312	-776	-771
Pbr015152.1	Myb_box5_MYB	2.7701	-776	-771
Gene	TF_Name	Z-Score	Start	End
Pbr015196.1	Myb_box1_MYB	3.0295	-614	-609
Pbr015196.1	AuxRE_ARF	2.8028	-546	-541
Pbr015196.1	W_box_WRKY	1.5847	-531	-526
Pbr015196.1	Myb_box2_MYB	2.9022	-42	-37
Pbr015196.1	Myb_box2_MYB	2.9022	-61	-56
Pbr015196.1	Myb_box5_MYB	2.9753	-60	-55
Pbr015196.1	Myb_box5_MYB	2.9753	-614	-609
Gene	TF_Name	Z-Score	Start	End
Pbr015219.1	GCC_box_AP2_EREBP	4.2345	-949	-944
Pbr015219.1	Nac_box_NAC	2.6611	-912	-907
Pbr015219.1	Nac_box_NAC	2.6611	-895	-890
Gene	TF_Name	Z-Score	Start	End
Pbr015264.1	G_box_bHLH	3.3129	-176	-171
Pbr015264.1	Myb_box5_MYB	2.0114	-835	-830
Pbr015264.1	Myb_box5_MYB	2.0114	-85	-80
Gene	TF_Name	Z-Score	Start	End
Pbr015297.1	Myb_box5_MYB	2.2773	-269	-264
Pbr015297.1	Myb_box5_MYB	2.2773	-65	-60
Pbr015297.1	Myb_box2_MYB	3.2505	-268	-263
Pbr015297.1	W_box_WRKY	1.6931	-492	-487
Gene	TF_Name	Z-Score	Start	End
Pbr015299.1	Myb_box5_MYB	2.8513	-215	-210
Pbr015299.1	Myb_box1_MYB	3.0682	-215	-210
Pbr015299.1	Nac_box_NAC	3.1168	-642	-637
Pbr015299.1	Nac_box_NAC	3.1168	-682	-677
Pbr015299.1	DREB_AP2_EREBP	3.488	-992	-987
Pbr015299.1	G_box_bHLH	3.5773	-639	-634
Pbr015299.1	G_box_bHLH	3.5773	-679	-674
Pbr015299.1	N_box_bHLH	2.8109	-634	-629
Pbr015299.1	Myb_box2_MYB	2.7511	-327	-322
Gene	TF_Name	Z-Score	Start	End
Pbr015308.1	Myb_box5_MYB	1.9136	-754	-749
Pbr015308.1	G_box_bHLH	3.1686	-479	-474
Pbr015308.1	W_box_WRKY	2.1764	-806	-801
Pbr015308.1	Myb_box3_MYB	2.0746	-355	-350
Gene	TF_Name	Z-Score	Start	End
Pbr015319.1	Myb_box5_MYB	2.9365	-927	-922
Pbr015319.1	G_box2_bZIP	2.2523	-332	-327
Pbr015319.1	Nac_box_NAC	2.8864	-913	-908
Pbr015319.1	Myb_box3_MYB	2.2646	-250	-245
Pbr015319.1	G_box_bHLH	3.4471	-908	-903
Pbr015319.1	W_box_WRKY	1.5665	-844	-839
Pbr015319.1	W_box_WRKY	1.5665	-530	-525
Pbr015319.1	Myb_box1_MYB	3.018	-927	-922
Gene	TF_Name	Z-Score	Start	End
Pbr015355.1	Myb_box1_MYB	2.1326	-695	-690
Pbr015355.1	Myb_box5_MYB	2.0109	-695	-690
Pbr015355.1	W_box_WRKY	1.5065	-17	-12
Gene	TF_Name	Z-Score	Start	End
Pbr015388.1	Myb_box5_MYB	2.0705	-121	-116
Pbr015388.1	Nac_box_NAC	2.6774	-517	-512
Pbr015388.1	Myb_box1_MYB	2.1037	-121	-116
Pbr015388.1	Myb_box3_MYB	2.0835	-135	-130
Gene	TF_Name	Z-Score	Start	End
Pbr015502.1	DREB_AP2_EREBP	2.5554	-716	-711
Pbr015502.1	G_box2_bZIP	2.0134	-953	-948
Pbr015502.1	Myb_box2_MYB	2.6548	-812	-807
Pbr015502.1	W_box_WRKY	2.1023	-242	-237
Pbr015502.1	Myb_box3_MYB	2.0132	-6	-1
Pbr015502.1	Myb_box5_MYB	1.8977	-827	-822
Pbr015502.1	AuxRE_ARF	2.6607	-485	-480
Gene	TF_Name	Z-Score	Start	End
Pbr015724.1	Myb_box1_MYB	2.0311	-834	-829
Pbr015724.1	Myb_box1_MYB	2.0311	-660	-655
Pbr015724.1	Myb_box5_MYB	1.9623	-834	-829
Pbr015724.1	Myb_box5_MYB	1.9623	-660	-655
Pbr015724.1	Myb_box2_MYB	1.9556	-181	-176
Pbr015724.1	N_box_bHLH	2.4658	-289	-284
Pbr015724.1	G_box_bHLH	2.4836	-548	-543
Pbr015724.1	DREB_AP2_EREBP	2.4712	-78	-73
Pbr015724.1	DREB_AP2_EREBP	2.4712	-110	-105
Gene	TF_Name	Z-Score	Start	End
Pbr015996.1	W_box_WRKY	2.1007	-175	-170
Pbr015996.1	G_box2_bZIP	1.996	-817	-812
Pbr015996.1	Myb_box1_MYB	2.677	-997	-992
Pbr015996.1	Myb_box5_MYB	2.5881	-997	-992
Gene	TF_Name	Z-Score	Start	End
Pbr016049.2	G_ABRE_bZIP	2.8419	-97	-90
Pbr016049.2	DREB_AP2_EREBP	2.4837	-152	-147
Pbr016049.2	Myb_box3_MYB	1.9757	-165	-160
Pbr016049.2	Myb_box5_MYB	2.5669	-192	-187
Pbr016049.2	Myb_box1_MYB	2.656	-192	-187
Gene	TF_Name	Z-Score	Start	End
Pbr016184.1	G_box2_bZIP	2.131	-747	-742
Pbr016184.1	DREB_AP2_EREBP	2.754	-475	-470
Pbr016184.1	N_box_bHLH	2.7202	-771	-766
Pbr016184.1	AuxRE_ARF	2.6626	-513	-508
Pbr016184.1	AuxRE_ARF	2.6626	-736	-731
Gene	TF_Name	Z-Score	Start	End
Pbr016190.1	Myb_box1_MYB	2.9245	-729	-724
Pbr016190.1	Myb_box5_MYB	2.8477	-239	-234
Pbr016190.1	Myb_box5_MYB	2.8477	-729	-724
Pbr016190.1	HBE_HB	1.5591	-39	-31
Pbr016190.1	Myb_box2_MYB	2.8965	-240	-235
Pbr016190.1	Myb_box2_MYB	2.8965	-162	-157
Gene	TF_Name	Z-Score	Start	End
Pbr016206.1	Myb_box5_MYB	3.0015	-247	-242
Pbr016206.1	W_box_WRKY	1.5669	-832	-827
Pbr016206.1	Myb_box4_MYB	2.8213	-190	-184
Pbr016206.1	G_box2_bZIP	3.0384	-507	-502
Pbr016206.1	HSE1_HSF	1.7507	-205	-198
Pbr016206.1	Nac_box_NAC	2.9784	-612	-607
Gene	TF_Name	Z-Score	Start	End
Pbr016235.1	Myb_box5_MYB	2.6843	-401	-396
Pbr016235.1	Myb_box1_MYB	2.0195	-438	-433
Pbr016235.1	Myb_box1_MYB	2.0195	-701	-696
Pbr016235.1	Nac_box_NAC	2.6709	-853	-848
Pbr016235.1	Myb_box2_MYB	2.6409	-516	-511
Pbr016235.1	Myb_box2_MYB	2.6409	-527	-522
Gene	TF_Name	Z-Score	Start	End
Pbr016252.1	G_box2_bZIP	2.1213	-223	-218
Pbr016252.1	C_ABRE_bZIP	3.6752	-109	-104
Pbr016252.1	Myb_box2_MYB	2.7975	-144	-139
Pbr016252.1	Nac_box_NAC	2.6991	-112	-107
Pbr016252.1	Nac_box_NAC	2.6991	-670	-665
Pbr016252.1	Myb_box5_MYB	2.0256	-7	-2
Gene	TF_Name	Z-Score	Start	End
Pbr017146.1	W_box_WRKY	2.1442	-653	-648
Pbr017146.1	W_box_WRKY	2.1442	-657	-652
Pbr017146.1	DREB_AP2_EREBP	3.2852	-375	-370
Pbr017146.1	Myb_box5_MYB	2.0017	-549	-544
Pbr017146.1	Myb_box5_MYB	2.0017	-547	-542
Pbr017146.1	Myb_box5_MYB	2.0017	-936	-931
Pbr017146.1	G_box_bHLH	3.2139	-323	-318
Pbr017146.1	AuxRE_ARF	2.6387	-192	-187
Pbr017146.1	N_box_bHLH	2.6558	-166	-161
Pbr017146.1	Myb_box3_MYB	2.0807	-881	-876
Pbr017146.1	Myb_box3_MYB	2.0807	-386	-381
Pbr017146.1	HSE1_HSF	1.545	-494	-487
Pbr017146.1	Nac_box_NAC	2.6785	-223	-218
Pbr017146.1	G_box2_bZIP	2.0912	-426	-421
Pbr017146.1	Myb_box1_MYB	2.1014	-936	-931
Gene	TF_Name	Z-Score	Start	End
Pbr017290.1	Myb_box2_MYB	2.2002	-234	-229
Pbr017290.1	Myb_box2_MYB	2.2002	-280	-275
Pbr017290.1	W_box_WRKY	1.9207	-79	-74
Gene	TF_Name	Z-Score	Start	End
Pbr017324.1	Myb_box2_MYB	3.2856	-960	-955
Pbr017324.1	Nac_box_NAC	3.036	-110	-105
Pbr017324.1	Myb_box1_MYB	2.4278	-141	-136
Pbr017324.1	Myb_box1_MYB	2.4278	-795	-790
Pbr017324.1	Myb_box5_MYB	3.1589	-650	-645
Pbr017324.1	W_box_WRKY	1.7197	-39	-34
Pbr017324.1	W_box_WRKY	1.7197	-273	-268
Gene	TF_Name	Z-Score	Start	End
Pbr017391.1	Myb_box5_MYB	2.0017	-276	-271
Pbr017391.1	Myb_box5_MYB	2.0017	-214	-209
Pbr017391.1	G_ABRE_bZIP	3.034	-245	-238
Pbr017391.1	G_box_bHLH	3.2594	-180	-175
Pbr017391.1	N_box_bHLH	2.6667	-839	-834
Pbr017391.1	Myb_box4_MYB	2.6522	-75	-69
Pbr017391.1	DREB_AP2_EREBP	2.6884	-78	-73
Pbr017391.1	DREB_AP2_EREBP	2.6884	-6	-1
Gene	TF_Name	Z-Score	Start	End
Pbr017420.1	W_box_WRKY	2.1016	-251	-246
Pbr017420.1	Myb_box1_MYB	2.7222	-849	-844
Pbr017420.1	Myb_box1_MYB	2.7222	-787	-782
Pbr017420.1	Myb_box2_MYB	2.6957	-133	-128
Pbr017420.1	AuxRE_ARF	2.5353	-142	-137
Pbr017420.1	Myb_box5_MYB	2.6752	-849	-844
Pbr017420.1	Myb_box5_MYB	2.6752	-787	-782
Pbr017420.1	C_ABRE_bZIP	3.555	-446	-441
Gene	TF_Name	Z-Score	Start	End
Pbr017488.1	W_box_WRKY	2.216	-482	-477
Pbr017488.1	Myb_box5_MYB	1.9506	-308	-303
Pbr017488.1	N_box_bHLH	2.7022	-28	-23
Pbr017488.1	N_box_bHLH	2.7022	-125	-120
Pbr017488.1	Myb_box4_MYB	2.5522	-8	-2
Gene	TF_Name	Z-Score	Start	End
Pbr017935.1	G_box2_bZIP	2.0519	-923	-918
Pbr017935.1	Myb_box1_MYB	2.7954	-280	-275
Pbr017935.1	Myb_box5_MYB	2.724	-280	-275
Gene	TF_Name	Z-Score	Start	End
Pbr018303.1	Myb_box1_MYB	2.2702	-540	-535
Pbr018303.1	Myb_box1_MYB	2.2702	-832	-827
Pbr018303.1	Myb_box5_MYB	2.1298	-123	-118
Pbr018303.1	Myb_box5_MYB	2.1298	-832	-827
Pbr018303.1	Myb_box5_MYB	2.1298	-834	-829
Pbr018303.1	Myb_box5_MYB	2.1298	-540	-535
Pbr018303.1	Myb_box2_MYB	2.8284	-837	-832
Pbr018303.1	Nac_box_NAC	2.9385	-56	-51
Pbr018303.1	W_box_WRKY	2.2815	-748	-743
Gene	TF_Name	Z-Score	Start	End
Pbr018641.1	DREB_AP2_EREBP	2.6075	-681	-676
Gene	TF_Name	Z-Score	Start	End
Pbr018673.1	C_ABRE_bZIP	3.3415	-246	-241
Pbr018673.1	Myb_box4_MYB	2.2378	-670	-664
Pbr018673.1	AuxRE_ARF	2.2013	-180	-175
Pbr018673.1	AuxRE_ARF	2.2013	-103	-98
Pbr018673.1	DREB_AP2_EREBP	2.9258	-21	-16
Pbr018673.1	N_box_bHLH	2.3049	-590	-585
Pbr018673.1	N_box_bHLH	2.3049	-501	-496
Pbr018673.1	Myb_box3_MYB	1.7512	-387	-382
Pbr018673.1	G_box_bHLH	2.8729	-545	-540
Pbr018673.1	Myb_box1_MYB	1.7636	-443	-438
Pbr018673.1	Myb_box1_MYB	1.7636	-954	-949
Pbr018673.1	W_box_WRKY	1.7793	-572	-567
Pbr018673.1	Myb_box5_MYB	1.6591	-914	-909
Pbr018673.1	Myb_box5_MYB	1.6591	-478	-473
Pbr018673.1	Myb_box5_MYB	1.6591	-47	-42
Pbr018673.1	Myb_box5_MYB	1.6591	-443	-438
Pbr018673.1	Myb_box5_MYB	1.6591	-954	-949
Pbr018673.1	Myb_box5_MYB	1.6591	-445	-440
Gene	TF_Name	Z-Score	Start	End
Pbr018679.1	N_box_bHLH	2.1677	-16	-11
Pbr018679.1	GCC_box_AP2_EREBP	2.9036	-138	-133
Pbr018679.1	GCC_box_AP2_EREBP	2.9036	-329	-324
Pbr018679.1	GCC_box_AP2_EREBP	2.9036	-137	-132
Pbr018679.1	GCC_box_AP2_EREBP	2.9036	-428	-423
Pbr018679.1	GCC_box_AP2_EREBP	2.9036	-892	-887
Pbr018679.1	DREB_AP2_EREBP	2.1751	-716	-711
Pbr018679.1	DREB_AP2_EREBP	2.1751	-787	-782
Gene	TF_Name	Z-Score	Start	End
Pbr018694.1	Myb_box2_MYB	2.727	-349	-344
Pbr018694.1	Myb_box1_MYB	2.9998	-191	-186
Pbr018694.1	Myb_box5_MYB	2.8179	-191	-186
Pbr018694.1	DREB_AP2_EREBP	2.7517	-79	-74
Pbr018694.1	W_box_WRKY	2.2917	-985	-980
Gene	TF_Name	Z-Score	Start	End
Pbr018850.1	G_ABRE_bZIP	3.7489	-230	-223
Pbr018850.1	Myb_box5_MYB	2.1325	-241	-236
Pbr018850.1	G_box_bHLH	3.39	-230	-225
Pbr018850.1	G_box_bHLH	3.39	-367	-362
Pbr018850.1	W_box_WRKY	2.3083	-223	-218
Pbr018850.1	G_box2_bZIP	2.2415	-194	-189
Pbr018850.1	Myb_box1_MYB	1.5211	-546	-541
Pbr018850.1	Myb_box3_MYB	2.2362	-546	-541
Pbr018850.1	HSE1_HSF	1.7071	-632	-625
Gene	TF_Name	Z-Score	Start	End
Pbr018873.1	Myb_box5_MYB	2.2388	-755	-750
Pbr018873.1	N_box_bHLH	2.1336	-768	-763
Pbr018873.1	N_box_bHLH	2.1336	-648	-643
Gene	TF_Name	Z-Score	Start	End
Pbr018970.1	DREB_AP2_EREBP	2.9147	-705	-700
Pbr018970.1	Myb_box1_MYB	1.5823	-393	-388
Pbr018970.1	W_box_WRKY	2.4221	-450	-445
Pbr018970.1	W_box_WRKY	2.4221	-899	-894
Pbr018970.1	Myb_box5_MYB	2.1805	-258	-253
Pbr018970.1	Myb_box5_MYB	2.1805	-929	-924
Pbr018970.1	Myb_box5_MYB	2.1805	-832	-827
Pbr018970.1	Myb_box3_MYB	2.3044	-393	-388
Gene	TF_Name	Z-Score	Start	End
Pbr019314.1	Myb_box5_MYB	1.9605	-970	-965
Pbr019314.1	Myb_box5_MYB	1.9605	-557	-552
Pbr019314.1	Myb_box4_MYB	1.7249	-585	-579
Pbr019314.1	Myb_box1_MYB	2.0505	-970	-965
Pbr019314.1	Myb_box2_MYB	1.8156	-359	-354
Pbr019314.1	GCC_box_AP2_EREBP	3.3165	-348	-343
Pbr019314.1	GCC_box_AP2_EREBP	3.3165	-372	-367
Pbr019314.1	GCC_box_AP2_EREBP	3.3165	-417	-412
Pbr019314.1	G_box_bHLH	2.4706	-774	-769
Pbr019314.1	DREB_AP2_EREBP	1.7988	-555	-550
Pbr019314.1	AuxRE_ARF	1.8519	-896	-891
Gene	TF_Name	Z-Score	Start	End
Pbr019459.1	AuxRE_ARF	2.4511	-19	-14
Pbr019459.1	Myb_box4_MYB	2.314	-238	-232
Pbr019459.1	Myb_box5_MYB	1.7351	-6	-1
Pbr019459.1	Myb_box5_MYB	1.7351	-215	-210
Pbr019459.1	Myb_box2_MYB	2.4551	-216	-211
Gene	TF_Name	Z-Score	Start	End
Pbr019494.1	Myb_box1_MYB	2.8503	-203	-198
Pbr019494.1	Myb_box3_MYB	2.0641	-292	-287
Pbr019494.1	Myb_box3_MYB	2.0641	-819	-814
Pbr019494.1	Myb_box3_MYB	2.0641	-728	-723
Pbr019494.1	Nac_box_NAC	2.7072	-919	-914
Pbr019494.1	Nac_box_NAC	2.7072	-932	-927
Pbr019494.1	Nac_box_NAC	2.7072	-991	-986
Pbr019494.1	DREB_AP2_EREBP	2.7116	-465	-460
Pbr019494.1	AuxRE_ARF	2.5754	-212	-207
Pbr019494.1	AuxRE_ARF	2.5754	-404	-399
Pbr019494.1	Myb_box5_MYB	2.835	-203	-198
Gene	TF_Name	Z-Score	Start	End
Pbr019636.1	Myb_box5_MYB	3.0536	-299	-294
Pbr019636.1	Myb_box1_MYB	3.1107	-299	-294
Pbr019636.1	W_box_WRKY	2.3643	-52	-47
Pbr019636.1	AuxRE_ARF	2.9734	-257	-252
Pbr019636.1	Nac_box_NAC	3.0119	-325	-320
Gene	TF_Name	Z-Score	Start	End
Pbr019677.3	Myb_box5_MYB	1.5908	-350	-345
Pbr019677.3	Myb_box5_MYB	1.5908	-227	-222
Pbr019677.3	Nac_box_NAC	3.126	-626	-621
Pbr019677.3	G_box_bHLH	3.7868	-159	-154
Pbr019677.3	W_box_WRKY	1.6755	-389	-384
Pbr019677.3	AuxRE_ARF	2.9966	-60	-55
Pbr019677.3	AuxRE_ARF	2.9966	-25	-20
Gene	TF_Name	Z-Score	Start	End
Pbr019690.1	AuxRE_ARF	2.7203	-529	-524
Pbr019690.1	Myb_box1_MYB	2.2204	-145	-140
Pbr019690.1	Myb_box1_MYB	2.2204	-88	-83
Pbr019690.1	Myb_box5_MYB	2.1112	-62	-57
Pbr019690.1	Myb_box5_MYB	2.1112	-88	-83
Pbr019690.1	Myb_box5_MYB	2.1112	-145	-140
Pbr019690.1	Myb_box5_MYB	2.1112	-844	-839
Pbr019690.1	Myb_box3_MYB	2.2169	-427	-422
Pbr019690.1	HBE_HB	2.2039	-852	-844
Pbr019690.1	W_box_WRKY	2.2482	-460	-455
Gene	TF_Name	Z-Score	Start	End
Pbr019700.1	N_box_bHLH	3.2569	-669	-664
Pbr019700.1	GCC_box_AP2_EREBP	4.0975	-750	-745
Pbr019700.1	AuxRE_ARF	2.516	-251	-246
Pbr019700.1	Myb_box5_MYB	2.7166	-700	-695
Pbr019700.1	W_box_WRKY	2.0656	-546	-541
Gene	TF_Name	Z-Score	Start	End
Pbr019707.1	Myb_box5_MYB	2.0084	-587	-582
Pbr019707.1	G_box_bHLH	3.2331	-242	-237
Pbr019707.1	Myb_box3_MYB	2.0515	-672	-667
Pbr019707.1	N_box_bHLH	2.694	-678	-673
Pbr019707.1	N_box_bHLH	2.694	-661	-656
Pbr019707.1	N_box_bHLH	2.694	-710	-705
Gene	TF_Name	Z-Score	Start	End
Pbr019859.1	DREB_AP2_EREBP	2.3982	-706	-701
Pbr019859.1	DREB_AP2_EREBP	2.3982	-732	-727
Pbr019859.1	N_box_bHLH	2.398	-211	-206
Pbr019859.1	Myb_box2_MYB	2.5394	-424	-419
Pbr019859.1	GCC_box_AP2_EREBP	3.8666	-317	-312
Pbr019859.1	GCC_box_AP2_EREBP	3.8666	-318	-313
Pbr019859.1	Myb_box5_MYB	1.7473	-125	-120
Pbr019859.1	Myb_box5_MYB	1.7473	-137	-132
Pbr019859.1	Myb_box5_MYB	1.7473	-162	-157
Pbr019859.1	Myb_box5_MYB	1.7473	-393	-388
Gene	TF_Name	Z-Score	Start	End
Pbr019871.1	AuxRE_ARF	2.6084	-511	-506
Pbr019871.1	G_box2_bZIP	2.0311	-785	-780
Pbr019871.1	Nac_box_NAC	2.6431	-579	-574
Pbr019871.1	Nac_box_NAC	2.6431	-193	-188
Pbr019871.1	G_box_bHLH	3.1959	-999	-994
Pbr019871.1	Myb_box5_MYB	2.6841	-252	-247
Pbr019871.1	Myb_box5_MYB	2.6841	-250	-245
Pbr019871.1	Myb_box4_MYB	2.5369	-416	-410
Pbr019871.1	Myb_box4_MYB	2.5369	-313	-307
Pbr019871.1	Myb_box3_MYB	2.014	-708	-703
Pbr019871.1	ABRE_ABI3_VP1	3.5461	-517	-508
Pbr019871.1	Myb_box1_MYB	2.7537	-250	-245
Gene	TF_Name	Z-Score	Start	End
Pbr019883.1	N_box_bHLH	2.9333	-968	-963
Pbr019883.1	G_box_bHLH	2.8995	-532	-527
Gene	TF_Name	Z-Score	Start	End
Pbr019907.1	N_box_bHLH	3.0351	-217	-212
Pbr019907.1	Myb_box5_MYB	2.3722	-30	-25
Pbr019907.1	Myb_box5_MYB	2.3722	-127	-122
Pbr019907.1	W_box_WRKY	1.7436	-40	-35
Pbr019907.1	DREB_AP2_EREBP	3.0493	-129	-124
Gene	TF_Name	Z-Score	Start	End
Pbr019921.1	N_box_bHLH	2.638	-496	-491
Pbr019921.1	Nac_box_NAC	2.7149	-188	-183
Pbr019921.1	Myb_box3_MYB	2.0998	-180	-175
Pbr019921.1	Myb_box3_MYB	2.0998	-694	-689
Pbr019921.1	Myb_box3_MYB	2.0998	-896	-891
Pbr019921.1	G_box_bHLH	3.2281	-641	-636
Pbr019921.1	G_box_bHLH	3.2281	-784	-779
Pbr019921.1	Myb_box2_MYB	2.7845	-475	-470
Pbr019921.1	DREB_AP2_EREBP	2.6384	-491	-486
Pbr019921.1	Myb_box5_MYB	1.9906	-489	-484
Pbr019921.1	W_box_WRKY	2.169	-534	-529
Gene	TF_Name	Z-Score	Start	End
Pbr019957.1	Myb_box2_MYB	2.1883	-364	-359
Pbr019957.1	Myb_box2_MYB	2.1883	-242	-237
Pbr019957.1	Myb_box2_MYB	2.1883	-331	-326
Pbr019957.1	Myb_box1_MYB	1.7035	-195	-190
Pbr019957.1	Myb_box3_MYB	1.7307	-608	-603
Pbr019957.1	Myb_box5_MYB	1.5384	-542	-537
Pbr019957.1	Myb_box5_MYB	1.5384	-195	-190
Gene	TF_Name	Z-Score	Start	End
Pbr019979.1	Nac_box_NAC	2.8888	-410	-405
Pbr019979.1	Nac_box_NAC	2.8888	-563	-558
Pbr019979.1	Myb_box3_MYB	2.2296	-401	-396
Pbr019979.1	Myb_box2_MYB	2.8903	-731	-726
Pbr019979.1	Myb_box2_MYB	2.8903	-785	-780
Pbr019979.1	Myb_box1_MYB	2.2502	-117	-112
Pbr019979.1	HSE1_HSF	1.707	-709	-702
Pbr019979.1	HSE1_HSF	1.707	-80	-73
Pbr019979.1	Myb_box5_MYB	2.1252	-925	-920
Pbr019979.1	Myb_box5_MYB	2.1252	-115	-110
Pbr019979.1	Myb_box5_MYB	2.1252	-117	-112
Pbr019979.1	Myb_box5_MYB	2.1252	-322	-317
Gene	TF_Name	Z-Score	Start	End
Pbr019984.2	N_box_bHLH	2.6296	-32	-27
Pbr019984.2	C_ABRE_bZIP	3.5354	-589	-584
Pbr019984.2	Nac_box_NAC	2.5027	-352	-347
Pbr019984.2	Nac_box_NAC	2.5027	-904	-899
Pbr019984.2	G_box2_bZIP	1.9708	-823	-818
Gene	TF_Name	Z-Score	Start	End
Pbr020001.1	G_box_bHLH	3.3526	-851	-846
Pbr020001.1	W_box_WRKY	2.2255	-329	-324
Pbr020001.1	W_box_WRKY	2.2255	-335	-330
Pbr020001.1	Myb_box5_MYB	2.8352	-301	-296
Pbr020001.1	HSE1_HSF	1.5991	-29	-22
Pbr020001.1	Myb_box3_MYB	2.1546	-870	-865
Pbr020001.1	Myb_box3_MYB	2.1546	-916	-911
Pbr020001.1	DREB_AP2_EREBP	3.3972	-377	-372
Pbr020001.1	Myb_box1_MYB	2.9122	-301	-296
Pbr020001.1	Myb_box4_MYB	2.6805	-645	-639
Pbr020001.1	Myb_box4_MYB	2.6805	-650	-644
Gene	TF_Name	Z-Score	Start	End
Pbr020024.1	AuxRE_ARF	2.9538	-683	-678
Pbr020024.1	AuxRE_ARF	2.9538	-423	-418
Pbr020024.1	Nac_box_NAC	3.0026	-233	-228
Pbr020024.1	DREB_AP2_EREBP	2.9097	-237	-232
Pbr020024.1	Myb_box5_MYB	2.9959	-159	-154
Pbr020024.1	Myb_box1_MYB	2.3289	-157	-152
Pbr020024.1	Myb_box1_MYB	2.3289	-24	-19
Pbr020024.1	W_box_WRKY	2.3586	-663	-658
Pbr020024.1	C_ABRE_bZIP	4.1768	-914	-909
Gene	TF_Name	Z-Score	Start	End
Pbr020040.1	Myb_box2_MYB	2.717	-41	-36
Pbr020040.1	G_box2_bZIP	2.1823	-976	-971
Pbr020040.1	N_box_bHLH	2.769	-35	-30
Pbr020040.1	Myb_box4_MYB	2.6713	-110	-104
Pbr020040.1	Myb_box5_MYB	2.8538	-196	-191
Pbr020040.1	Myb_box1_MYB	2.183	-293	-288
Pbr020040.1	Myb_box3_MYB	2.1614	-751	-746
Pbr020040.1	AuxRE_ARF	2.7435	-156	-151
Gene	TF_Name	Z-Score	Start	End
Pbr020227.1	Myb_box1_MYB	2.4337	-816	-811
Pbr020227.1	Myb_box1_MYB	2.4337	-450	-445
Pbr020227.1	Myb_box1_MYB	2.4337	-893	-888
Pbr020227.1	Myb_box5_MYB	3.1793	-77	-72
Pbr020227.1	HSE1_HSF	1.8826	-35	-28
Pbr020227.1	Myb_box2_MYB	3.1104	-512	-507
Pbr020227.1	W_box_WRKY	2.4326	-809	-804
Pbr020227.1	DREB_AP2_EREBP	3.0911	-414	-409
Pbr020227.1	G_box2_bZIP	2.4165	-133	-128
Gene	TF_Name	Z-Score	Start	End
Pbr020338.1	GCC_box_AP2_EREBP	4.034	-809	-804
Pbr020338.1	N_box_bHLH	2.5437	-886	-881
Pbr020338.1	Myb_box5_MYB	1.888	-243	-238
Pbr020338.1	Myb_box2_MYB	2.7644	-211	-206
Pbr020338.1	Myb_box2_MYB	2.7644	-927	-922
Pbr020338.1	G_box2_bZIP	2.0037	-147	-142
Pbr020338.1	Myb_box1_MYB	1.9971	-243	-238
Pbr020338.1	Myb_box4_MYB	2.6069	-980	-974
Gene	TF_Name	Z-Score	Start	End
Pbr020446.1	DREB_AP2_EREBP	3.2699	-198	-193
Pbr020446.1	Myb_box5_MYB	1.9833	-797	-792
Pbr020446.1	G_box_bHLH	3.3027	-300	-295
Pbr020446.1	G_box_bHLH	3.3027	-593	-588
Pbr020446.1	Myb_box3_MYB	2.1616	-965	-960
Pbr020446.1	W_box_WRKY	1.5632	-495	-490
Gene	TF_Name	Z-Score	Start	End
Pbr020473.1	Myb_box1_MYB	2.0252	-423	-418
Pbr020473.1	Myb_box1_MYB	2.0252	-873	-868
Pbr020473.1	Myb_box1_MYB	2.0252	-20	-15
Pbr020473.1	G_box2_bZIP	2.0271	-952	-947
Pbr020473.1	Myb_box2_MYB	2.6422	-868	-863
Pbr020473.1	Myb_box2_MYB	2.6422	-562	-557
Pbr020473.1	Myb_box5_MYB	1.9299	-423	-418
Pbr020473.1	Myb_box5_MYB	1.9299	-871	-866
Pbr020473.1	Myb_box5_MYB	1.9299	-873	-868
Pbr020473.1	Myb_box5_MYB	1.9299	-18	-13
Pbr020473.1	Myb_box5_MYB	1.9299	-20	-15
Pbr020473.1	G_box_bHLH	3.1448	-567	-562
Pbr020473.1	W_box_WRKY	2.0641	-796	-791
Pbr020473.1	W_box_WRKY	2.0641	-542	-537
Pbr020473.1	G_box1_bZIP	3.8145	-568	-561
Gene	TF_Name	Z-Score	Start	End
Pbr020483.1	Myb_box5_MYB	2.4826	-49	-44
Pbr020483.1	Myb_box5_MYB	2.4826	-589	-584
Pbr020483.1	Myb_box2_MYB	2.4994	-252	-247
Pbr020483.1	Nac_box_NAC	2.4623	-576	-571
Pbr020483.1	Myb_box3_MYB	1.8708	-734	-729
Pbr020483.1	Myb_box3_MYB	1.8708	-113	-108
Pbr020483.1	AuxRE_ARF	2.4585	-197	-192
Pbr020483.1	G_box2_bZIP	1.8674	-631	-626
Gene	TF_Name	Z-Score	Start	End
Pbr020595.1	Myb_box4_MYB	2.9054	-538	-532
Pbr020595.1	Myb_box4_MYB	2.9054	-824	-818
Pbr020595.1	Myb_box5_MYB	2.1864	-507	-502
Pbr020595.1	Myb_box5_MYB	2.1864	-831	-826
Pbr020595.1	Myb_box5_MYB	2.1864	-245	-240
Pbr020595.1	Myb_box5_MYB	2.1864	-255	-250
Pbr020595.1	W_box_WRKY	2.4338	-101	-96
Pbr020595.1	Nac_box_NAC	2.9992	-713	-708
Pbr020595.1	Myb_box2_MYB	3.0125	-506	-501
Pbr020595.1	Myb_box3_MYB	2.2785	-896	-891
Pbr020595.1	Myb_box1_MYB	2.3172	-831	-826
Gene	TF_Name	Z-Score	Start	End
Pbr020763.1	Nac_box_NAC	2.4848	-174	-169
Pbr020763.1	Myb_box2_MYB	2.5645	-109	-104
Pbr020763.1	Myb_box2_MYB	2.5645	-202	-197
Pbr020763.1	Myb_box1_MYB	1.8992	-875	-870
Pbr020763.1	Myb_box1_MYB	1.8992	-883	-878
Pbr020763.1	Myb_box5_MYB	2.6404	-406	-401
Pbr020763.1	Myb_box5_MYB	2.6404	-516	-511
Pbr020763.1	G_box2_bZIP	2.6286	-207	-202
Gene	TF_Name	Z-Score	Start	End
Pbr020894.2	W_box_WRKY	1.6228	-261	-256
Pbr020894.2	W_box_WRKY	1.6228	-555	-550
Pbr020894.2	W_box_WRKY	1.6228	-870	-865
Pbr020894.2	Myb_box3_MYB	2.3348	-168	-163
Pbr020894.2	Myb_box3_MYB	2.3348	-377	-372
Pbr020894.2	Myb_box3_MYB	2.3348	-777	-772
Pbr020894.2	Myb_box3_MYB	2.3348	-983	-978
Pbr020894.2	Myb_box1_MYB	1.5943	-168	-163
Pbr020894.2	Myb_box1_MYB	1.5943	-377	-372
Pbr020894.2	Myb_box1_MYB	1.5943	-777	-772
Pbr020894.2	Myb_box1_MYB	1.5943	-983	-978
Gene	TF_Name	Z-Score	Start	End
Pbr021109.1	Myb_box2_MYB	2.5377	-503	-498
Pbr021109.1	Myb_box2_MYB	2.5377	-806	-801
Pbr021109.1	HBE_HB	1.7939	-787	-779
Pbr021109.1	Myb_box5_MYB	1.6949	-504	-499
Pbr021109.1	Myb_box5_MYB	1.6949	-593	-588
Pbr021109.1	AuxRE_ARF	2.5509	-461	-456
Gene	TF_Name	Z-Score	Start	End
Pbr021643.1	Nac_box_NAC	2.5592	-444	-439
Pbr021643.1	Myb_box4_MYB	2.1917	-75	-69
Pbr021643.1	N_box_bHLH	2.3894	-317	-312
Pbr021643.1	N_box_bHLH	2.3894	-80	-75
Pbr021643.1	Myb_box2_MYB	2.2911	-162	-157
Pbr021643.1	Myb_box5_MYB	2.4735	-161	-156
Pbr021643.1	Myb_box5_MYB	2.4735	-129	-124
Gene	TF_Name	Z-Score	Start	End
Pbr022142.1	DREB_AP2_EREBP	3.8944	-68	-63
Pbr022142.1	W_box_WRKY	1.8459	-421	-416
Pbr022142.1	Myb_box5_MYB	2.4427	-352	-347
Pbr022142.1	Myb_box5_MYB	2.4427	-23	-18
Pbr022142.1	Myb_box5_MYB	2.4427	-354	-349
Gene	TF_Name	Z-Score	Start	End
Pbr022232.1	Myb_box1_MYB	2.294	-351	-346
Pbr022232.1	W_box_WRKY	2.3474	-987	-982
Pbr022232.1	Nac_box_NAC	2.976	-552	-547
Pbr022232.1	Myb_box5_MYB	2.1547	-791	-786
Pbr022232.1	Myb_box5_MYB	2.1547	-351	-346
Pbr022232.1	Myb_box5_MYB	2.1547	-482	-477
Gene	TF_Name	Z-Score	Start	End
Pbr022351.1	Myb_box5_MYB	1.7598	-10	-5
Pbr022351.1	Myb_box5_MYB	1.7598	-33	-28
Pbr022351.1	Myb_box5_MYB	1.7598	-378	-373
Pbr022351.1	Myb_box5_MYB	1.7598	-12	-7
Pbr022351.1	Myb_box5_MYB	1.7598	-389	-384
Pbr022351.1	Myb_box5_MYB	1.7598	-460	-455
Pbr022351.1	Myb_box5_MYB	1.7598	-196	-191
Pbr022351.1	Myb_box3_MYB	1.8899	-265	-260
Pbr022351.1	Myb_box4_MYB	2.456	-518	-512
Pbr022351.1	Myb_box4_MYB	2.456	-939	-933
Pbr022351.1	G_box2_bZIP	1.8945	-173	-168
Pbr022351.1	C_ABRE_bZIP	3.4855	-962	-957
Pbr022351.1	C_ABRE_bZIP	3.4855	-177	-172
Pbr022351.1	W_box_WRKY	1.9784	-126	-121
Pbr022351.1	Myb_box2_MYB	2.5393	-32	-27
Pbr022351.1	Myb_box2_MYB	2.5393	-513	-508
Pbr022351.1	Myb_box1_MYB	1.8768	-460	-455
Pbr022351.1	Myb_box1_MYB	1.8768	-196	-191
Gene	TF_Name	Z-Score	Start	End
Pbr022420.1	N_box_bHLH	2.7135	-189	-184
Pbr022420.1	Myb_box2_MYB	2.8074	-834	-829
Pbr022420.1	Myb_box5_MYB	2.7773	-494	-489
Pbr022420.1	Myb_box5_MYB	2.7773	-201	-196
Pbr022420.1	Myb_box5_MYB	2.7773	-984	-979
Pbr022420.1	Myb_box4_MYB	2.6496	-918	-912
Pbr022420.1	Myb_box1_MYB	2.8599	-494	-489
Pbr022420.1	Myb_box1_MYB	2.8599	-984	-979
Pbr022420.1	HSE1_HSF	1.5762	-214	-207
Pbr022420.1	Myb_box3_MYB	2.1079	-463	-458
Pbr022420.1	Myb_box3_MYB	2.1079	-994	-989
Pbr022420.1	Myb_box3_MYB	2.1079	-581	-576
Pbr022420.1	Myb_box3_MYB	2.1079	-371	-366
Gene	TF_Name	Z-Score	Start	End
Pbr023500.1	Myb_box1_MYB	2.805	-409	-404
Pbr023500.1	Myb_box5_MYB	2.7596	-409	-404
Pbr023500.1	Myb_box2_MYB	2.7509	-906	-901
Gene	TF_Name	Z-Score	Start	End
Pbr023640.1	W_box_WRKY	1.6837	-522	-517
Pbr023640.1	Myb_box5_MYB	2.3613	-303	-298
Pbr023640.1	Myb_box5_MYB	2.3613	-779	-774
Pbr023640.1	Myb_box2_MYB	3.1558	-98	-93
Pbr023640.1	AuxRE_ARF	3.1359	-881	-876
Pbr023640.1	G_box2_bZIP	2.4414	-933	-928
Pbr023640.1	HSE1_HSF	1.9266	-254	-247
Pbr023640.1	HBE_HB	1.751	-714	-706
Gene	TF_Name	Z-Score	Start	End
Pbr024019.1	Myb_box3_MYB	2.1229	-632	-627
Pbr024019.1	DREB_AP2_EREBP	2.6962	-10	-5
Pbr024019.1	Myb_box2_MYB	2.7634	-65	-60
Pbr024019.1	Myb_box5_MYB	2.797	-66	-61
Pbr024019.1	N_box_bHLH	2.7144	-440	-435
Gene	TF_Name	Z-Score	Start	End
Pbr024051.1	Nac_box_NAC	2.6051	-484	-479
Pbr024051.1	W_box_WRKY	1.9006	-518	-513
Pbr024051.1	Myb_box3_MYB	1.8971	-792	-787
Pbr024051.1	Myb_box3_MYB	1.8971	-981	-976
Pbr024051.1	Myb_box3_MYB	1.8971	-24	-19
Pbr024051.1	Myb_box5_MYB	1.812	-970	-965
Pbr024051.1	G_box2_bZIP	1.8785	-192	-187
Pbr024051.1	DREB_AP2_EREBP	2.5273	-838	-833
Pbr024051.1	AuxRE_ARF	2.3871	-398	-393
Pbr024051.1	AuxRE_ARF	2.3871	-395	-390
Pbr024051.1	N_box_bHLH	3.1833	-960	-955
Gene	TF_Name	Z-Score	Start	End
Pbr024078.1	W_box_WRKY	2.4143	-573	-568
Pbr024078.1	Myb_box2_MYB	3.1882	-985	-980
Pbr024078.1	AuxRE_ARF	2.9923	-97	-92
Pbr024078.1	AuxRE_ARF	2.9923	-440	-435
Pbr024078.1	Nac_box_NAC	2.9768	-342	-337
Gene	TF_Name	Z-Score	Start	End
Pbr024104.1	AuxRE_ARF	2.7408	-851	-846
Pbr024104.1	G_box_bHLH	3.2553	-545	-540
Pbr024104.1	Nac_box_NAC	2.6895	-662	-657
Pbr024104.1	DREB_AP2_EREBP	2.5985	-317	-312
Pbr024104.1	G_box2_bZIP	2.7642	-396	-391
Pbr024104.1	Myb_box1_MYB	2.0195	-822	-817
Pbr024104.1	Myb_box5_MYB	1.8896	-586	-581
Pbr024104.1	Myb_box5_MYB	1.8896	-822	-817
Gene	TF_Name	Z-Score	Start	End
Pbr024125.1	DREB_AP2_EREBP	3.0109	-386	-381
Pbr024125.1	DREB_AP2_EREBP	3.0109	-465	-460
Pbr024125.1	DREB_AP2_EREBP	3.0109	-349	-344
Pbr024125.1	DREB_AP2_EREBP	3.0109	-446	-441
Pbr024125.1	DREB_AP2_EREBP	3.0109	-330	-325
Pbr024125.1	N_box_bHLH	3.0452	-696	-691
Pbr024125.1	N_box_bHLH	3.0452	-91	-86
Pbr024125.1	Myb_box4_MYB	2.2794	-954	-948
Pbr024125.1	Myb_box4_MYB	2.2794	-798	-792
Pbr024125.1	Myb_box4_MYB	2.2794	-669	-663
Pbr024125.1	Nac_box_NAC	2.4479	-706	-701
Pbr024125.1	Myb_box5_MYB	1.7152	-955	-950
Pbr024125.1	Myb_box5_MYB	1.7152	-691	-686
Pbr024125.1	Myb_box5_MYB	1.7152	-799	-794
Pbr024125.1	Myb_box2_MYB	2.3205	-379	-374
Pbr024125.1	Myb_box2_MYB	2.3205	-489	-484
Pbr024125.1	Myb_box2_MYB	2.3205	-439	-434
Pbr024125.1	Myb_box2_MYB	2.3205	-369	-364
Pbr024125.1	Myb_box2_MYB	2.3205	-313	-308
Pbr024125.1	Myb_box2_MYB	2.3205	-283	-278
Pbr024125.1	Myb_box2_MYB	2.3205	-499	-494
Pbr024125.1	Myb_box2_MYB	2.3205	-429	-424
Pbr024125.1	Myb_box2_MYB	2.3205	-323	-318
Gene	TF_Name	Z-Score	Start	End
Pbr024198.1	Myb_box2_MYB	2.9644	-940	-935
Pbr024198.1	AuxRE_ARF	2.7699	-951	-946
Pbr024198.1	Myb_box1_MYB	2.9899	-556	-551
Pbr024198.1	Myb_box1_MYB	2.9899	-574	-569
Pbr024198.1	G_box_bHLH	3.4332	-332	-327
Pbr024198.1	HSE1_HSF	1.6868	-804	-797
Pbr024198.1	Nac_box_NAC	2.8319	-710	-705
Pbr024198.1	Myb_box3_MYB	2.2029	-223	-218
Pbr024198.1	Myb_box3_MYB	2.2029	-753	-748
Pbr024198.1	Myb_box5_MYB	2.9782	-556	-551
Pbr024198.1	Myb_box5_MYB	2.9782	-574	-569
Gene	TF_Name	Z-Score	Start	End
Pbr024233.1	Myb_box5_MYB	2.0841	-373	-368
Pbr024233.1	Myb_box5_MYB	2.0841	-602	-597
Pbr024233.1	Myb_box1_MYB	2.213	-373	-368
Pbr024233.1	Myb_box1_MYB	2.213	-602	-597
Pbr024233.1	C_ABRE_bZIP	3.8325	-900	-895
Pbr024233.1	N_box_bHLH	2.7682	-809	-804
Gene	TF_Name	Z-Score	Start	End
Pbr024413.1	HBE_HB	2.458	-471	-463
Pbr024413.1	HSE1_HSF	1.8967	-397	-390
Gene	TF_Name	Z-Score	Start	End
Pbr024424.1	Myb_box1_MYB	2.5098	-633	-628
Pbr024424.1	Nac_box_NAC	2.3741	-946	-941
Pbr024424.1	Nac_box_NAC	2.3741	-490	-485
Pbr024424.1	Myb_box5_MYB	2.478	-633	-628
Pbr024424.1	Myb_box4_MYB	2.2049	-844	-838
Pbr024424.1	Myb_box4_MYB	2.2049	-691	-685
Pbr024424.1	C_ABRE_bZIP	3.4025	-38	-33
Pbr024424.1	G_box_bHLH	2.9217	-444	-439
Gene	TF_Name	Z-Score	Start	End
Pbr024537.2	HBE_HB	1.5162	-81	-73
Pbr024537.2	G_box2_bZIP	2.2022	-564	-559
Pbr024537.2	Myb_box5_MYB	2.0401	-63	-58
Pbr024537.2	Myb_box5_MYB	2.0401	-451	-446
Pbr024537.2	Myb_box2_MYB	2.5564	-276	-271
Pbr024537.2	Myb_box4_MYB	2.5146	-350	-344
Pbr024537.2	G_box_bHLH	3.4018	-596	-591
Pbr024537.2	G_box_bHLH	3.4018	-599	-594
Pbr024537.2	AuxRE_ARF	2.6757	-133	-128
Gene	TF_Name	Z-Score	Start	End
Pbr024571.1	Myb_box2_MYB	2.3594	-467	-462
Pbr024571.1	G_box2_bZIP	2.4365	-175	-170
Pbr024571.1	Myb_box5_MYB	2.394	-115	-110
Pbr024571.1	Myb_box1_MYB	2.4568	-115	-110
Pbr024571.1	Myb_box4_MYB	2.2422	-498	-492
Pbr024571.1	Myb_box3_MYB	1.7766	-504	-499
Gene	TF_Name	Z-Score	Start	End
Pbr024592.1	W_box_WRKY	1.6745	-951	-946
Pbr024592.1	W_box_WRKY	1.6745	-573	-568
Pbr024592.1	Myb_box2_MYB	3.1119	-494	-489
Pbr024592.1	Myb_box2_MYB	3.1119	-712	-707
Pbr024592.1	Myb_box5_MYB	2.29	-249	-244
Pbr024592.1	Myb_box5_MYB	2.29	-495	-490
Pbr024592.1	Myb_box5_MYB	2.29	-322	-317
Pbr024592.1	Myb_box5_MYB	2.29	-320	-315
Pbr024592.1	Myb_box4_MYB	2.9869	-591	-585
Pbr024592.1	Myb_box4_MYB	2.9869	-530	-524
Pbr024592.1	Myb_box1_MYB	2.4114	-322	-317
Gene	TF_Name	Z-Score	Start	End
Pbr025035.1	DREB_AP2_EREBP	2.5558	-438	-433
Pbr025035.1	Myb_box3_MYB	1.9774	-586	-581
Pbr025035.1	G_box2_bZIP	2.6364	-932	-927
Pbr025035.1	C_ABRE_bZIP	3.6153	-849	-844
Pbr025035.1	Myb_box5_MYB	1.8707	-695	-690
Pbr025035.1	Myb_box5_MYB	1.8707	-277	-272
Pbr025035.1	Myb_box5_MYB	1.8707	-987	-982
Pbr025035.1	G_box_bHLH	3.1268	-722	-717
Gene	TF_Name	Z-Score	Start	End
Pbr025136.1	Myb_box1_MYB	1.7401	-216	-211
Pbr025136.1	DREB_AP2_EREBP	2.2097	-98	-93
Pbr025136.1	G_ABRE_bZIP	2.4851	-184	-177
Pbr025136.1	G_ABRE_bZIP	2.4851	-273	-266
Pbr025136.1	Myb_box2_MYB	2.2501	-471	-466
Pbr025136.1	Myb_box2_MYB	2.2501	-561	-556
Pbr025136.1	Myb_box5_MYB	2.3079	-157	-152
Pbr025136.1	Myb_box5_MYB	2.3079	-195	-190
Pbr025136.1	G_box_bHLH	2.7918	-835	-830
Pbr025136.1	G_box_bHLH	2.7918	-93	-88
Pbr025136.1	Nac_box_NAC	2.3363	-657	-652
Gene	TF_Name	Z-Score	Start	End
Pbr025162.1	W_box_WRKY	1.8241	-280	-275
Pbr025162.1	Myb_box1_MYB	2.57	-218	-213
Pbr025162.1	N_box_bHLH	3.9453	-466	-461
Pbr025162.1	Myb_box5_MYB	2.4539	-502	-497
Pbr025162.1	Myb_box5_MYB	2.4539	-218	-213
Pbr025162.1	Myb_box3_MYB	2.5244	-984	-979
Gene	TF_Name	Z-Score	Start	End
Pbr025182.1	N_box_bHLH	2.8135	-479	-474
Pbr025182.1	Myb_box2_MYB	2.9315	-25	-20
Gene	TF_Name	Z-Score	Start	End
Pbr025184.1	AuxRE_ARF	2.7999	-104	-99
Pbr025184.1	AuxRE_ARF	2.7999	-52	-47
Pbr025184.1	Myb_box5_MYB	2.109	-879	-874
Pbr025184.1	Myb_box4_MYB	2.6596	-135	-129
Pbr025184.1	W_box_WRKY	2.2725	-183	-178
Gene	TF_Name	Z-Score	Start	End
Pbr025295.1	G_ABRE_bZIP	3.3039	-115	-108
Pbr025295.1	AuxRE_ARF	2.5338	-526	-521
Pbr025295.1	W_box_WRKY	2.03	-290	-285
Pbr025295.1	Myb_box5_MYB	1.8433	-657	-652
Pbr025295.1	G_box_bHLH	3.0554	-113	-108
Gene	TF_Name	Z-Score	Start	End
Pbr025312.1	W_box_WRKY	2.5031	-220	-215
Pbr025312.1	Myb_box5_MYB	1.5658	-225	-220
Pbr025312.1	Myb_box5_MYB	1.5658	-132	-127
Pbr025312.1	Myb_box5_MYB	1.5658	-298	-293
Pbr025312.1	Myb_box5_MYB	1.5658	-255	-250
Pbr025312.1	Myb_box5_MYB	1.5658	-541	-536
Pbr025312.1	G_box_bHLH	3.6778	-662	-657
Pbr025312.1	Myb_box3_MYB	2.4403	-225	-220
Pbr025312.1	Myb_box3_MYB	2.4403	-132	-127
Pbr025312.1	Myb_box3_MYB	2.4403	-255	-250
Pbr025312.1	Myb_box1_MYB	1.7263	-225	-220
Pbr025312.1	Myb_box1_MYB	1.7263	-132	-127
Pbr025312.1	Myb_box1_MYB	1.7263	-255	-250
Pbr025312.1	Myb_box2_MYB	3.2141	-544	-539
Pbr025312.1	Myb_box2_MYB	3.2141	-301	-296
Gene	TF_Name	Z-Score	Start	End
Pbr025686.1	Myb_box5_MYB	1.5224	-51	-46
Pbr025686.1	Myb_box5_MYB	1.5224	-837	-832
Pbr025686.1	Myb_box5_MYB	1.5224	-599	-594
Pbr025686.1	Myb_box5_MYB	1.5224	-656	-651
Pbr025686.1	Myb_box5_MYB	1.5224	-15	-10
Pbr025686.1	Myb_box5_MYB	1.5224	-654	-649
Pbr025686.1	Myb_box1_MYB	1.7445	-837	-832
Pbr025686.1	Myb_box3_MYB	1.7593	-277	-272
Pbr025686.1	Myb_box3_MYB	1.7593	-262	-257
Pbr025686.1	Myb_box2_MYB	2.1127	-684	-679
Pbr025686.1	Myb_box2_MYB	2.1127	-625	-620
Pbr025686.1	W_box_WRKY	1.837	-290	-285
Pbr025686.1	DREB_AP2_EREBP	2.2182	-360	-355
Pbr025686.1	DREB_AP2_EREBP	2.2182	-648	-643
Gene	TF_Name	Z-Score	Start	End
Pbr025940.1	W_box_WRKY	2.1953	-258	-253
Pbr025940.1	W_box_WRKY	2.1953	-349	-344
Pbr025940.1	W_box_WRKY	2.1953	-242	-237
Pbr025940.1	G_box_bHLH	3.3447	-792	-787
Pbr025940.1	AuxRE_ARF	2.6951	-318	-313
Pbr025940.1	AuxRE_ARF	2.6951	-751	-746
Pbr025940.1	Myb_box5_MYB	2.0944	-591	-586
Pbr025940.1	DREB_AP2_EREBP	2.775	-1000	-995
Pbr025940.1	G_box2_bZIP	2.1767	-344	-339
Pbr025940.1	Nac_box_NAC	2.8287	-863	-858
Gene	TF_Name	Z-Score	Start	End
Pbr025987.1	Nac_box_NAC	2.896	-401	-396
Pbr025987.1	Myb_box5_MYB	2.0712	-68	-63
Pbr025987.1	Myb_box5_MYB	2.0712	-465	-460
Pbr025987.1	Myb_box5_MYB	2.0712	-266	-261
Gene	TF_Name	Z-Score	Start	End
Pbr026243.1	Myb_box2_MYB	2.6252	-528	-523
Pbr026243.1	Myb_box5_MYB	2.6549	-756	-751
Pbr026243.1	G_box2_bZIP	1.9146	-443	-438
Pbr026243.1	Myb_box1_MYB	2.6585	-756	-751
Pbr026243.1	Myb_box3_MYB	1.9358	-593	-588
Pbr026243.1	N_box_bHLH	2.5246	-159	-154
Gene	TF_Name	Z-Score	Start	End
Pbr026284.1	AuxRE_ARF	2.2139	-456	-451
Pbr026284.1	AuxRE_ARF	2.2139	-193	-188
Pbr026284.1	AuxRE_ARF	2.2139	-369	-364
Pbr026284.1	AuxRE_ARF	2.2139	-490	-485
Pbr026284.1	Myb_box1_MYB	1.8971	-310	-305
Pbr026284.1	Myb_box5_MYB	1.8337	-312	-307
Pbr026284.1	Myb_box5_MYB	1.8337	-310	-305
Pbr026284.1	W_box_WRKY	1.8264	-315	-310
Pbr026284.1	G_box2_bZIP	1.8167	-585	-580
Pbr026284.1	G_box2_bZIP	1.8167	-717	-712
Gene	TF_Name	Z-Score	Start	End
Pbr026572.3	W_box_WRKY	2.4051	-121	-116
Pbr026572.3	Myb_box5_MYB	2.3698	-460	-455
Gene	TF_Name	Z-Score	Start	End
Pbr026574.1	W_box_WRKY	1.5645	-732	-727
Pbr026574.1	W_box_WRKY	1.5645	-679	-674
Pbr026574.1	Myb_box5_MYB	3.0506	-390	-385
Pbr026574.1	Myb_box2_MYB	2.8262	-505	-500
Pbr026574.1	HBE_HB	2.3601	-575	-567
Pbr026574.1	Nac_box_NAC	3.0294	-469	-464
Pbr026574.1	Myb_box1_MYB	3.1574	-390	-385
Gene	TF_Name	Z-Score	Start	End
Pbr026584.1	Myb_box3_MYB	2.2913	-328	-323
Pbr026584.1	Myb_box5_MYB	2.9287	-799	-794
Pbr026584.1	Myb_box1_MYB	2.2957	-885	-880
Pbr026584.1	Myb_box1_MYB	2.2957	-724	-719
Gene	TF_Name	Z-Score	Start	End
Pbr026619.1	DREB_AP2_EREBP	2.2954	-983	-978
Pbr026619.1	AuxRE_ARF	2.4783	-894	-889
Pbr026619.1	AuxRE_ARF	2.4783	-968	-963
Pbr026619.1	Myb_box2_MYB	2.3237	-901	-896
Pbr026619.1	Myb_box4_MYB	2.2219	-832	-826
Pbr026619.1	Myb_box1_MYB	2.5454	-213	-208
Pbr026619.1	Myb_box5_MYB	2.3918	-213	-208
Pbr026619.1	N_box_bHLH	2.9221	-302	-297
Pbr026619.1	N_box_bHLH	2.9221	-300	-295
Gene	TF_Name	Z-Score	Start	End
Pbr026769.1	AuxRE_ARF	2.8476	-866	-861
Pbr026769.1	W_box_WRKY	2.2898	-986	-981
Pbr026769.1	Myb_box1_MYB	3.011	-956	-951
Pbr026769.1	Myb_box5_MYB	2.9606	-956	-951
Gene	TF_Name	Z-Score	Start	End
Pbr026775.1	Myb_box1_MYB	1.8204	-49	-44
Pbr026775.1	Myb_box1_MYB	1.8204	-182	-177
Pbr026775.1	W_box_WRKY	2.0205	-374	-369
Pbr026775.1	HBE_HB	1.7838	-739	-731
Pbr026775.1	C_ABRE_bZIP	3.4097	-791	-786
Pbr026775.1	Myb_box5_MYB	1.7518	-584	-579
Pbr026775.1	Myb_box5_MYB	1.7518	-49	-44
Pbr026775.1	Myb_box5_MYB	1.7518	-182	-177
Gene	TF_Name	Z-Score	Start	End
Pbr026822.1	GCC_box_AP2_EREBP	3.9283	-662	-657
Pbr026822.1	G_box2_bZIP	1.9778	-472	-467
Pbr026822.1	Myb_box1_MYB	1.9505	-827	-822
Pbr026822.1	Myb_box2_MYB	2.4974	-113	-108
Pbr026822.1	Myb_box2_MYB	2.4974	-47	-42
Pbr026822.1	W_box_WRKY	2.0649	-627	-622
Pbr026822.1	G_box_bHLH	3.0814	-708	-703
Pbr026822.1	Myb_box4_MYB	2.3951	-67	-61
Pbr026822.1	Myb_box4_MYB	2.3951	-453	-447
Pbr026822.1	Myb_box5_MYB	1.7979	-46	-41
Pbr026822.1	Myb_box5_MYB	1.7979	-189	-184
Pbr026822.1	Myb_box5_MYB	1.7979	-827	-822
Gene	TF_Name	Z-Score	Start	End
Pbr026827.1	Myb_box5_MYB	2.7985	-906	-901
Pbr026827.1	Myb_box5_MYB	2.7985	-202	-197
Pbr026827.1	Myb_box2_MYB	2.8134	-213	-208
Pbr026827.1	Myb_box1_MYB	2.8576	-202	-197
Pbr026827.1	N_box_bHLH	3.3693	-901	-896
Pbr026827.1	Myb_box4_MYB	2.661	-548	-542
Pbr026827.1	W_box_WRKY	2.2435	-945	-940
Pbr026827.1	W_box_WRKY	2.2435	-154	-149
Gene	TF_Name	Z-Score	Start	End
Pbr027114.1	W_box_WRKY	2.0086	-765	-760
Pbr027114.1	W_box_WRKY	2.0086	-773	-768
Pbr027114.1	GCC_box_AP2_EREBP	3.9407	-793	-788
Pbr027114.1	Myb_box3_MYB	1.9227	-737	-732
Pbr027114.1	Myb_box3_MYB	1.9227	-657	-652
Pbr027114.1	Myb_box5_MYB	2.5539	-893	-888
Pbr027114.1	AuxRE_ARF	2.5107	-741	-736
Pbr027114.1	G_box2_bZIP	1.9418	-369	-364
Gene	TF_Name	Z-Score	Start	End
Pbr027309.1	G_box_bHLH	2.9502	-302	-297
Pbr027309.1	Nac_box_NAC	2.4217	-141	-136
Pbr027309.1	Myb_box3_MYB	1.881	-46	-41
Pbr027309.1	Myb_box5_MYB	1.8038	-868	-863
Pbr027309.1	Myb_box5_MYB	1.8038	-102	-97
Pbr027309.1	Myb_box5_MYB	1.8038	-896	-891
Gene	TF_Name	Z-Score	Start	End
Pbr027388.1	Myb_box5_MYB	1.9411	-199	-194
Pbr027388.1	Myb_box5_MYB	1.9411	-120	-115
Pbr027388.1	Myb_box5_MYB	1.9411	-297	-292
Pbr027388.1	G_box2_bZIP	1.9777	-150	-145
Pbr027388.1	W_box_WRKY	2.0312	-747	-742
Pbr027388.1	Nac_box_NAC	2.6285	-55	-50
Pbr027388.1	G_box_bHLH	3.236	-194	-189
Pbr027388.1	G_box_bHLH	3.236	-709	-704
Pbr027388.1	Myb_box1_MYB	2.0129	-199	-194
Pbr027388.1	Myb_box1_MYB	2.0129	-120	-115
Pbr027388.1	Myb_box1_MYB	2.0129	-297	-292
Pbr027388.1	Myb_box2_MYB	2.7851	-715	-710
Gene	TF_Name	Z-Score	Start	End
Pbr027427.1	C_ABRE_bZIP	4.3347	-289	-284
Pbr027427.1	Myb_box5_MYB	2.3359	-135	-130
Pbr027427.1	Myb_box5_MYB	2.3359	-576	-571
Pbr027427.1	HSE1_HSF	1.9323	-921	-914
Pbr027427.1	W_box_WRKY	2.4766	-105	-100
Pbr027427.1	W_box_WRKY	2.4766	-330	-325
Pbr027427.1	DREB_AP2_EREBP	3.846	-498	-493
Pbr027427.1	Nac_box_NAC	3.0733	-720	-715
Gene	TF_Name	Z-Score	Start	End
Pbr027450.1	Myb_box5_MYB	2.9656	-402	-397
Pbr027450.1	Nac_box_NAC	2.808	-65	-60
Pbr027450.1	G_box_bHLH	3.4963	-285	-280
Pbr027450.1	G_box2_bZIP	2.162	-151	-146
Pbr027450.1	Myb_box3_MYB	2.1688	-680	-675
Pbr027450.1	Myb_box3_MYB	2.1688	-146	-141
Pbr027450.1	C_ABRE_bZIP	4.0102	-456	-451
Pbr027450.1	Myb_box1_MYB	2.9756	-402	-397
Gene	TF_Name	Z-Score	Start	End
Pbr027755.1	N_box_bHLH	2.4089	-77	-72
Pbr027755.1	Myb_box4_MYB	2.3392	-381	-375
Pbr027755.1	Myb_box5_MYB	2.5184	-526	-521
Pbr027755.1	DREB_AP2_EREBP	2.4228	-510	-505
Pbr027755.1	G_box2_bZIP	2.5651	-237	-232
Pbr027755.1	AuxRE_ARF	2.403	-72	-67
Gene	TF_Name	Z-Score	Start	End
Pbr027757.1	Nac_box_NAC	3.0659	-396	-391
Pbr027757.1	Myb_box5_MYB	3.3756	-293	-288
Pbr027757.1	W_box_WRKY	1.7065	-721	-716
Pbr027757.1	G_box2_bZIP	2.4623	-853	-848
Pbr027757.1	G_box_bHLH	3.7804	-106	-101
Pbr027757.1	Myb_box2_MYB	3.3584	-294	-289
Pbr027757.1	Myb_box2_MYB	3.3584	-513	-508
Gene	TF_Name	Z-Score	Start	End
Pbr027886.1	G_ABRE_bZIP	2.4783	-326	-319
Pbr027886.1	Myb_box2_MYB	2.1626	-550	-545
Pbr027886.1	Myb_box2_MYB	2.1626	-554	-549
Pbr027886.1	Myb_box2_MYB	2.1626	-833	-828
Pbr027886.1	Myb_box3_MYB	1.7428	-513	-508
Pbr027886.1	DREB_AP2_EREBP	2.768	-242	-237
Pbr027886.1	N_box_bHLH	2.7901	-120	-115
Pbr027886.1	Myb_box5_MYB	1.596	-859	-854
Pbr027886.1	Myb_box5_MYB	1.596	-909	-904
Pbr027886.1	Myb_box5_MYB	1.596	-907	-902
Pbr027886.1	Myb_box5_MYB	1.596	-398	-393
Pbr027886.1	Myb_box5_MYB	1.596	-404	-399
Pbr027886.1	Myb_box5_MYB	1.596	-477	-472
Pbr027886.1	Myb_box1_MYB	1.7363	-477	-472
Pbr027886.1	Myb_box1_MYB	1.7363	-398	-393
Gene	TF_Name	Z-Score	Start	End
Pbr027948.1	HSE1_HSF	1.6185	-803	-796
Pbr027948.1	AuxRE_ARF	2.8008	-657	-652
Pbr027948.1	Myb_box5_MYB	2.8467	-76	-71
Pbr027948.1	Myb_box1_MYB	2.155	-599	-594
Pbr027948.1	Myb_box1_MYB	2.155	-533	-528
Pbr027948.1	C_ABRE_bZIP	3.8335	-760	-755
Pbr027948.1	DREB_AP2_EREBP	2.7481	-267	-262
Gene	TF_Name	Z-Score	Start	End
Pbr028411.1	DREB_AP2_EREBP	2.5676	-829	-824
Pbr028411.1	GCC_box_AP2_EREBP	3.3073	-886	-881
Pbr028411.1	N_box_bHLH	2.5723	-298	-293
Pbr028411.1	Myb_box4_MYB	2.1277	-849	-843
Gene	TF_Name	Z-Score	Start	End
Pbr028472.1	W_box_WRKY	1.9551	-759	-754
Pbr028472.1	W_box_WRKY	1.9551	-350	-345
Pbr028472.1	W_box_WRKY	1.9551	-580	-575
Pbr028472.1	C_ABRE_bZIP	3.6669	-481	-476
Pbr028472.1	Myb_box1_MYB	2.6434	-942	-937
Pbr028472.1	GCC_box_AP2_EREBP	3.9655	-311	-306
Pbr028472.1	N_box_bHLH	3.0833	-400	-395
Pbr028472.1	Myb_box5_MYB	2.5207	-942	-937
Gene	TF_Name	Z-Score	Start	End
Pbr028481.1	Myb_box3_MYB	2.1366	-247	-242
Pbr028481.1	Myb_box3_MYB	2.1366	-637	-632
Pbr028481.1	G_box2_bZIP	2.1712	-285	-280
Pbr028481.1	Myb_box1_MYB	2.9643	-857	-852
Pbr028481.1	HSE1_HSF	1.5443	-842	-835
Pbr028481.1	DREB_AP2_EREBP	2.8144	-404	-399
Pbr028481.1	Myb_box2_MYB	2.8072	-519	-514
Pbr028481.1	N_box_bHLH	3.5383	-854	-849
Pbr028481.1	Myb_box5_MYB	2.906	-857	-852
Gene	TF_Name	Z-Score	Start	End
Pbr028507.1	Myb_box5_MYB	2.8444	-83	-78
Pbr028507.1	Myb_box1_MYB	2.8913	-83	-78
Gene	TF_Name	Z-Score	Start	End
Pbr028565.1	Myb_box1_MYB	1.9718	-402	-397
Pbr028565.1	Myb_box3_MYB	1.9557	-363	-358
Pbr028565.1	Myb_box3_MYB	1.9557	-966	-961
Pbr028565.1	Myb_box3_MYB	1.9557	-711	-706
Pbr028565.1	Myb_box5_MYB	1.8492	-402	-397
Pbr028565.1	AuxRE_ARF	2.3917	-943	-938
Pbr028565.1	G_box2_bZIP	1.94	-860	-855
Gene	TF_Name	Z-Score	Start	End
Pbr028583.1	Myb_box5_MYB	2.1303	-838	-833
Pbr028583.1	Nac_box_NAC	2.9644	-529	-524
Pbr028583.1	Myb_box3_MYB	2.2837	-396	-391
Pbr028583.1	W_box_WRKY	2.3945	-808	-803
Pbr028583.1	Myb_box1_MYB	1.6151	-396	-391
Gene	TF_Name	Z-Score	Start	End
Pbr029428.1	W_box_WRKY	1.7352	-463	-458
Pbr029428.1	Myb_box4_MYB	2.9514	-969	-963
Pbr029428.1	G_box2_bZIP	2.4953	-906	-901
Pbr029428.1	G_box2_bZIP	2.4953	-675	-670
Pbr029428.1	DREB_AP2_EREBP	3.7285	-112	-107
Pbr029428.1	Myb_box5_MYB	2.3084	-61	-56
Pbr029428.1	Myb_box5_MYB	2.3084	-918	-913
Pbr029428.1	Myb_box5_MYB	2.3084	-396	-391
Pbr029428.1	Myb_box5_MYB	2.3084	-394	-389
Gene	TF_Name	Z-Score	Start	End
Pbr029597.1	HSE1_HSF	1.601	-844	-837
Pbr029597.1	Myb_box5_MYB	2.0105	-816	-811
Pbr029597.1	Myb_box3_MYB	2.1578	-164	-159
Pbr029597.1	W_box_WRKY	2.312	-282	-277
Gene	TF_Name	Z-Score	Start	End
Pbr029978.1	G_box2_bZIP	2.5703	-605	-600
Pbr029978.1	W_box_WRKY	1.9191	-451	-446
Pbr029978.1	W_box_WRKY	1.9191	-425	-420
Pbr029978.1	Myb_box5_MYB	2.5879	-320	-315
Pbr029978.1	Myb_box2_MYB	2.469	-321	-316
Pbr029978.1	DREB_AP2_EREBP	2.4917	-206	-201
Pbr029978.1	G_box_bHLH	3.0154	-330	-325
Pbr029978.1	Myb_box1_MYB	1.9146	-916	-911
Gene	TF_Name	Z-Score	Start	End
Pbr029987.1	G_box2_bZIP	2.857	-161	-156
Pbr029987.1	G_box2_bZIP	2.857	-977	-972
Pbr029987.1	AuxRE_ARF	2.5614	-462	-457
Pbr029987.1	DREB_AP2_EREBP	2.8548	-305	-300
Pbr029987.1	DREB_AP2_EREBP	2.8548	-747	-742
Gene	TF_Name	Z-Score	Start	End
Pbr030004.1	Myb_box4_MYB	2.9682	-21	-15
Pbr030004.1	Myb_box3_MYB	2.2748	-511	-506
Pbr030004.1	Myb_box1_MYB	1.5377	-511	-506
Pbr030004.1	Myb_box2_MYB	3.0679	-562	-557
Pbr030004.1	AuxRE_ARF	2.9747	-681	-676
Pbr030004.1	AuxRE_ARF	2.9747	-234	-229
Pbr030004.1	Myb_box5_MYB	3.0097	-404	-399
Pbr030004.1	W_box_WRKY	1.6324	-225	-220
Gene	TF_Name	Z-Score	Start	End
Pbr030005.1	Myb_box4_MYB	2.8822	-21	-15
Pbr030005.1	Myb_box3_MYB	2.1957	-800	-795
Pbr030005.1	AuxRE_ARF	2.7997	-234	-229
Pbr030005.1	W_box_WRKY	1.5287	-225	-220
Pbr030005.1	W_box_WRKY	1.5287	-770	-765
Gene	TF_Name	Z-Score	Start	End
Pbr030081.1	Myb_box1_MYB	1.5603	-904	-899
Pbr030081.1	Myb_box2_MYB	3.3362	-920	-915
Pbr030081.1	Myb_box5_MYB	3.1341	-921	-916
Pbr030081.1	HSE1_HSF	1.7495	-204	-197
Pbr030081.1	Myb_box3_MYB	2.2733	-904	-899
Pbr030081.1	W_box_WRKY	1.5622	-620	-615
Gene	TF_Name	Z-Score	Start	End
Pbr030418.1	W_box_WRKY	1.7809	-681	-676
Pbr030418.1	DREB_AP2_EREBP	2.1506	-349	-344
Pbr030418.1	DREB_AP2_EREBP	2.1506	-216	-211
Pbr030418.1	Myb_box3_MYB	1.6734	-641	-636
Pbr030418.1	G_box_bHLH	2.7043	-345	-340
Pbr030418.1	G_box_bHLH	2.7043	-204	-199
Pbr030418.1	G_box_bHLH	2.7043	-687	-682
Pbr030418.1	Myb_box1_MYB	1.6559	-330	-325
Pbr030418.1	Nac_box_NAC	2.2432	-791	-786
Pbr030418.1	G_box2_bZIP	2.296	-314	-309
Pbr030418.1	N_box_bHLH	2.745	-193	-188
Pbr030418.1	N_box_bHLH	2.745	-195	-190
Pbr030418.1	Myb_box5_MYB	2.2607	-544	-539
Gene	TF_Name	Z-Score	Start	End
Pbr030620.2	Myb_box1_MYB	2.9071	-131	-126
Pbr030620.2	Myb_box5_MYB	2.9534	-698	-693
Pbr030620.2	Myb_box5_MYB	2.9534	-131	-126
Pbr030620.2	Nac_box_NAC	2.7276	-682	-677
[truncated: 562 more rows]

## Sheet: P. communis
Gene	TF_Name	Z-Score	Start	End
pycom01g09420	C_ABRE_bZIP	3.9118	-703	-698
pycom01g09420	Myb_box5_MYB	2.0541	-137	-132
pycom01g09420	Myb_box5_MYB	2.0541	-571	-566
pycom01g09420	AuxRE_ARF	2.6329	-379	-374
pycom01g09420	Myb_box2_MYB	2.7797	-211	-206
pycom01g09420	G_ABRE_bZIP	3.2063	-21	-14
Gene	TF_Name	Z-Score	Start	End
pycom01g09780	G_box2_bZIP	2.3131	-362	-357
pycom01g09780	W_box_WRKY	1.6776	-529	-524
pycom01g09780	N_box_bHLH	3.4757	-626	-621
pycom01g09780	DREB_AP2_EREBP	2.8797	-78	-73
pycom01g09780	G_ABRE_bZIP	3.7933	-117	-110
pycom01g09780	G_box_bHLH	3.4753	-117	-112
pycom01g09780	G_box_bHLH	3.4753	-148	-143
pycom01g09780	G_box_bHLH	3.4753	-913	-908
pycom01g09780	Myb_box2_MYB	3.0687	-806	-801
pycom01g09780	Myb_box5_MYB	2.18	-178	-173
Gene	TF_Name	Z-Score	Start	End
pycom01g12140	Myb_box4_MYB	2.9237	-627	-621
pycom01g12140	Myb_box5_MYB	2.2159	-760	-755
pycom01g12140	Myb_box5_MYB	2.2159	-611	-606
pycom01g12140	AuxRE_ARF	3.0378	-248	-243
pycom01g12140	Myb_box2_MYB	3.0184	-947	-942
pycom01g12140	W_box_WRKY	2.4272	-137	-132
pycom01g12140	DREB_AP2_EREBP	2.9796	-484	-479
pycom01g12140	G_box2_bZIP	2.3481	-311	-306
pycom01g12140	Myb_box1_MYB	2.3466	-760	-755
Gene	TF_Name	Z-Score	Start	End
pycom01g16800	Myb_box5_MYB	2.8861	-33	-28
pycom01g16800	DREB_AP2_EREBP	2.7817	-990	-985
pycom01g16800	G_box2_bZIP	2.8952	-313	-308
pycom01g16800	Myb_box2_MYB	2.718	-318	-313
pycom01g16800	Myb_box1_MYB	2.9429	-33	-28
pycom01g16800	N_box_bHLH	3.4568	-87	-82
pycom01g16800	HSE1_HSF	1.5309	-131	-124
pycom01g16800	AuxRE_ARF	2.7697	-208	-203
pycom01g16800	AuxRE_ARF	2.7697	-381	-376
Gene	TF_Name	Z-Score	Start	End
pycom01g17270	Myb_box5_MYB	1.8435	-948	-943
pycom01g17270	GCC_box_AP2_EREBP	3.816	-16	-11
pycom01g17270	C_ABRE_bZIP	3.6164	-538	-533
pycom01g17270	Myb_box2_MYB	2.4364	-76	-71
pycom01g17270	G_box_bHLH	3.0861	-298	-293
pycom01g17270	G_box_bHLH	3.0861	-382	-377
Gene	TF_Name	Z-Score	Start	End
pycom01g17370	Myb_box2_MYB	2.6369	-816	-811
pycom01g17370	Myb_box5_MYB	2.6862	-715	-710
pycom01g17370	Myb_box5_MYB	2.6862	-817	-812
pycom01g17370	Nac_box_NAC	2.617	-210	-205
pycom01g17370	Myb_box1_MYB	2.7233	-715	-710
pycom01g17370	AuxRE_ARF	2.4762	-995	-990
pycom01g17370	AuxRE_ARF	2.4762	-998	-993
pycom01g17370	AuxRE_ARF	2.4762	-38	-33
pycom01g17370	N_box_bHLH	3.198	-413	-408
pycom01g17370	G_box2_bZIP	2.0033	-214	-209
Gene	TF_Name	Z-Score	Start	End
pycom01g17530	Myb_box5_MYB	1.8026	-427	-422
pycom01g17530	Myb_box5_MYB	1.8026	-425	-420
pycom01g17530	N_box_bHLH	2.4722	-571	-566
pycom01g17530	W_box_WRKY	1.9832	-58	-53
Gene	TF_Name	Z-Score	Start	End
pycom01g18310	AuxRE_ARF	2.8714	-577	-572
pycom01g18310	W_box_WRKY	1.6003	-393	-388
pycom01g18310	Myb_box1_MYB	2.3537	-684	-679
pycom01g18310	Myb_box5_MYB	2.2381	-27	-22
pycom01g18310	Myb_box5_MYB	2.2381	-684	-679
pycom01g18310	Myb_box5_MYB	2.2381	-428	-423
pycom01g18310	N_box_bHLH	2.9348	-631	-626
pycom01g18310	DREB_AP2_EREBP	3.6152	-745	-740
Gene	TF_Name	Z-Score	Start	End
pycom01g18400	Myb_box4_MYB	3.4212	-487	-481
pycom01g18400	Myb_box2_MYB	3.4956	-482	-477
pycom01g18400	Myb_box3_MYB	2.6827	-653	-648
pycom01g18400	Myb_box1_MYB	1.9325	-653	-648
pycom01g18400	W_box_WRKY	1.9371	-201	-196
pycom01g18400	Myb_box5_MYB	2.6015	-321	-316
Gene	TF_Name	Z-Score	Start	End
pycom01g18720	DREB_AP2_EREBP	2.7712	-155	-150
pycom01g18720	Myb_box2_MYB	2.7924	-279	-274
pycom01g18720	Myb_box1_MYB	2.2028	-428	-423
pycom01g18720	Myb_box4_MYB	2.7462	-86	-80
pycom01g18720	Myb_box5_MYB	2.0537	-153	-148
pycom01g18720	Myb_box5_MYB	2.0537	-278	-273
pycom01g18720	Myb_box5_MYB	2.0537	-428	-423
pycom01g18720	G_box_bHLH	3.4433	-695	-690
pycom01g18720	AuxRE_ARF	2.7596	-408	-403
pycom01g18720	AuxRE_ARF	2.7596	-949	-944
Gene	TF_Name	Z-Score	Start	End
pycom01g18910	Nac_box_NAC	2.5874	-768	-763
pycom01g18910	Myb_box1_MYB	2.7419	-445	-440
pycom01g18910	DREB_AP2_EREBP	2.5814	-235	-230
pycom01g18910	AuxRE_ARF	2.5847	-26	-21
pycom01g18910	AuxRE_ARF	2.5847	-632	-627
pycom01g18910	AuxRE_ARF	2.5847	-780	-775
pycom01g18910	Myb_box5_MYB	2.7104	-445	-440
Gene	TF_Name	Z-Score	Start	End
pycom01g20870	Myb_box3_MYB	1.9948	-960	-955
pycom01g20870	Myb_box5_MYB	2.6928	-587	-582
pycom01g20870	G_box2_bZIP	1.9943	-88	-83
pycom01g20870	Myb_box1_MYB	2.0083	-246	-241
pycom01g20870	G_box_bHLH	3.1438	-233	-228
Gene	TF_Name	Z-Score	Start	End
pycom01g21190	Myb_box1_MYB	2.8628	-971	-966
pycom01g21190	Myb_box5_MYB	2.8439	-971	-966
pycom01g21190	DREB_AP2_EREBP	3.401	-888	-883
Gene	TF_Name	Z-Score	Start	End
pycom01g21300	Myb_box5_MYB	1.803	-89	-84
pycom01g21300	DREB_AP2_EREBP	2.2386	-271	-266
pycom01g21300	DREB_AP2_EREBP	2.2386	-322	-317
pycom01g21300	DREB_AP2_EREBP	2.2386	-588	-583
pycom01g21300	Myb_box2_MYB	1.6806	-503	-498
pycom01g21300	Myb_box4_MYB	1.5498	-486	-480
pycom01g21300	N_box_bHLH	2.242	-47	-42
pycom01g21300	GCC_box_AP2_EREBP	2.8725	-176	-171
pycom01g21300	GCC_box_AP2_EREBP	2.8725	-336	-331
Gene	TF_Name	Z-Score	Start	End
pycom02g00280	N_box_bHLH	3.2846	-83	-78
pycom02g00280	Myb_box5_MYB	2.7665	-960	-955
Gene	TF_Name	Z-Score	Start	End
pycom02g03060	HBE_HB	1.6118	-885	-877
pycom02g03060	Myb_box3_MYB	2.2154	-754	-749
pycom02g03060	Myb_box1_MYB	1.5071	-754	-749
pycom02g03060	Myb_box2_MYB	2.792	-12	-7
Gene	TF_Name	Z-Score	Start	End
pycom02g03950	HSE1_HSF	1.7787	-256	-249
pycom02g03950	Myb_box5_MYB	2.1201	-176	-171
pycom02g03950	Myb_box5_MYB	2.1201	-311	-306
pycom02g03950	Myb_box5_MYB	2.1201	-66	-61
pycom02g03950	Myb_box5_MYB	2.1201	-585	-580
pycom02g03950	W_box_WRKY	2.3645	-417	-412
pycom02g03950	N_box_bHLH	3.4695	-465	-460
pycom02g03950	Myb_box2_MYB	2.9621	-620	-615
pycom02g03950	DREB_AP2_EREBP	2.824	-732	-727
Gene	TF_Name	Z-Score	Start	End
pycom02g06760	G_box_bHLH	3.5262	-969	-964
pycom02g06760	Myb_box2_MYB	3.0163	-465	-460
pycom02g06760	Myb_box5_MYB	2.1716	-940	-935
Gene	TF_Name	Z-Score	Start	End
pycom02g07340	Myb_box4_MYB	2.6246	-168	-162
pycom02g07340	Myb_box1_MYB	2.2434	-797	-792
pycom02g07340	Myb_box5_MYB	2.9134	-313	-308
pycom02g07340	W_box_WRKY	2.2154	-52	-47
pycom02g07340	AuxRE_ARF	2.7504	-221	-216
pycom02g07340	DREB_AP2_EREBP	2.8434	-297	-292
Gene	TF_Name	Z-Score	Start	End
pycom02g11680	Myb_box3_MYB	1.9643	-789	-784
pycom02g11680	Myb_box2_MYB	2.4494	-839	-834
pycom02g11680	Myb_box5_MYB	2.6145	-923	-918
pycom02g11680	W_box_WRKY	2.0183	-261	-256
pycom02g11680	W_box_WRKY	2.0183	-867	-862
pycom02g11680	HBE_HB	1.9461	-399	-391
Gene	TF_Name	Z-Score	Start	End
pycom02g13800	G_ABRE_bZIP	2.5896	-312	-305
pycom02g13800	G_ABRE_bZIP	2.5896	-401	-394
pycom02g13800	Myb_box1_MYB	1.7571	-344	-339
pycom02g13800	Myb_box1_MYB	1.7571	-752	-747
pycom02g13800	Myb_box1_MYB	1.7571	-865	-860
pycom02g13800	DREB_AP2_EREBP	2.2855	-199	-194
pycom02g13800	G_box_bHLH	2.8833	-695	-690
pycom02g13800	G_box_bHLH	2.8833	-194	-189
pycom02g13800	Myb_box5_MYB	2.3787	-323	-318
Gene	TF_Name	Z-Score	Start	End
pycom02g14000	G_box2_bZIP	2.052	-622	-617
pycom02g14000	Myb_box1_MYB	2.0801	-678	-673
pycom02g14000	Myb_box5_MYB	1.9881	-678	-673
pycom02g14000	N_box_bHLH	2.681	-742	-737
pycom02g14000	N_box_bHLH	2.681	-202	-197
pycom02g14000	G_box_bHLH	3.2363	-225	-220
pycom02g14000	C_ABRE_bZIP	3.707	-312	-307
pycom02g14000	AuxRE_ARF	2.5728	-538	-533
Gene	TF_Name	Z-Score	Start	End
pycom02g14290	G_box_bHLH	3.0907	-143	-138
pycom02g14290	Myb_box1_MYB	2.6106	-184	-179
pycom02g14290	Myb_box2_MYB	2.3536	-919	-914
pycom02g14290	G_box2_bZIP	1.9539	-945	-940
pycom02g14290	Myb_box5_MYB	2.4978	-184	-179
pycom02g14290	C_ABRE_bZIP	3.6351	-949	-944
pycom02g14290	N_box_bHLH	2.446	-190	-185
Gene	TF_Name	Z-Score	Start	End
pycom02g14320	Nac_box_NAC	2.786	-213	-208
pycom02g14320	DREB_AP2_EREBP	2.6253	-149	-144
pycom02g14320	N_box_bHLH	2.6514	-633	-628
Gene	TF_Name	Z-Score	Start	End
pycom02g14340	Myb_box5_MYB	2.0873	-879	-874
pycom02g14340	AuxRE_ARF	2.7132	-105	-100
pycom02g14340	AuxRE_ARF	2.7132	-51	-46
pycom02g14340	W_box_WRKY	2.2174	-184	-179
Gene	TF_Name	Z-Score	Start	End
pycom02g21070	Myb_box5_MYB	1.7618	-358	-353
pycom02g21070	Myb_box5_MYB	1.7618	-957	-952
pycom02g21070	Myb_box5_MYB	1.7618	-959	-954
pycom02g21070	Myb_box4_MYB	2.3628	-926	-920
pycom02g21070	DREB_AP2_EREBP	3.0145	-962	-957
pycom02g21070	AuxRE_ARF	2.5077	-979	-974
Gene	TF_Name	Z-Score	Start	End
pycom02g21180	Myb_box4_MYB	2.0356	-864	-858
pycom02g21180	Myb_box2_MYB	2.0841	-134	-129
pycom02g21180	N_box_bHLH	2.7649	-439	-434
pycom02g21180	GCC_box_AP2_EREBP	3.4066	-117	-112
pycom02g21180	G_box2_bZIP	1.6909	-755	-750
pycom02g21180	Myb_box5_MYB	2.2554	-812	-807
pycom02g21180	Myb_box5_MYB	2.2554	-96	-91
pycom02g21180	Myb_box1_MYB	2.3717	-812	-807
pycom02g21180	Myb_box1_MYB	2.3717	-96	-91
pycom02g21180	W_box_WRKY	1.7106	-85	-80
Gene	TF_Name	Z-Score	Start	End
pycom02g21260	Myb_box5_MYB	3.1941	-515	-510
pycom02g21260	W_box_WRKY	1.7013	-238	-233
pycom02g21260	Myb_box1_MYB	3.2611	-515	-510
pycom02g21260	AuxRE_ARF	3.0261	-93	-88
Gene	TF_Name	Z-Score	Start	End
pycom03g04020	Myb_box2_MYB	2.0864	-243	-238
pycom03g04020	Myb_box2_MYB	2.0864	-298	-293
pycom03g04020	Myb_box4_MYB	1.9861	-794	-788
pycom03g04020	N_box_bHLH	2.1662	-614	-609
pycom03g04020	Myb_box5_MYB	1.5362	-962	-957
pycom03g04020	Myb_box5_MYB	1.5362	-19	-14
Gene	TF_Name	Z-Score	Start	End
pycom03g04800	Myb_box5_MYB	1.8852	-538	-533
pycom03g04800	Myb_box3_MYB	2.0144	-528	-523
pycom03g04800	W_box_WRKY	2.0984	-192	-187
pycom03g04800	W_box_WRKY	2.0984	-71	-66
pycom03g04800	N_box_bHLH	2.5712	-498	-493
Gene	TF_Name	Z-Score	Start	End
pycom03g05070	Myb_box1_MYB	1.7185	-188	-183
pycom03g05070	Myb_box1_MYB	1.7185	-309	-304
pycom03g05070	Myb_box1_MYB	1.7185	-562	-557
pycom03g05070	Myb_box5_MYB	1.5988	-188	-183
pycom03g05070	Myb_box5_MYB	1.5988	-359	-354
pycom03g05070	Myb_box5_MYB	1.5988	-307	-302
pycom03g05070	Myb_box5_MYB	1.5988	-309	-304
pycom03g05070	Myb_box5_MYB	1.5988	-327	-322
pycom03g05070	Myb_box5_MYB	1.5988	-562	-557
pycom03g05070	Myb_box5_MYB	1.5988	-594	-589
pycom03g05070	N_box_bHLH	2.862	-436	-431
pycom03g05070	W_box_WRKY	1.81	-662	-657
pycom03g05070	G_box2_bZIP	1.7249	-509	-504
pycom03g05070	HBE_HB	1.682	-498	-490
pycom03g05070	Myb_box2_MYB	2.3283	-360	-355
pycom03g05070	Myb_box2_MYB	2.3283	-572	-567
pycom03g05070	Myb_box2_MYB	2.3283	-328	-323
pycom03g05070	AuxRE_ARF	2.3074	-421	-416
pycom03g05070	Nac_box_NAC	2.3683	-754	-749
pycom03g05070	Nac_box_NAC	2.3683	-182	-177
Gene	TF_Name	Z-Score	Start	End
pycom03g05320	N_box_bHLH	3.5119	-342	-337
pycom03g05320	AuxRE_ARF	2.8021	-70	-65
pycom03g05320	G_box_bHLH	3.4314	-451	-446
pycom03g05320	Myb_box3_MYB	2.2475	-567	-562
pycom03g05320	Myb_box1_MYB	1.5209	-567	-562
pycom03g05320	W_box_WRKY	2.295	-10	-5
pycom03g05320	W_box_WRKY	2.295	-736	-731
pycom03g05320	W_box_WRKY	2.295	-865	-860
pycom03g05320	Nac_box_NAC	2.8334	-454	-449
pycom03g05320	Myb_box4_MYB	2.8299	-411	-405
Gene	TF_Name	Z-Score	Start	End
pycom03g05360	Myb_box3_MYB	2.0593	-574	-569
pycom03g05360	Myb_box5_MYB	2.7174	-59	-54
pycom03g05360	Myb_box5_MYB	2.7174	-113	-108
pycom03g05360	Myb_box1_MYB	2.7481	-59	-54
pycom03g05360	Myb_box1_MYB	2.7481	-113	-108
Gene	TF_Name	Z-Score	Start	End
pycom03g05550	G_box_bHLH	2.9297	-936	-931
pycom03g05550	Myb_box5_MYB	2.4554	-198	-193
pycom03g05550	GCC_box_AP2_EREBP	3.7265	-941	-936
pycom03g05550	Myb_box4_MYB	2.3366	-15	-9
Gene	TF_Name	Z-Score	Start	End
pycom03g05650	G_box_bHLH	3.3247	-976	-971
pycom03g05650	Nac_box_NAC	2.8094	-457	-452
Gene	TF_Name	Z-Score	Start	End
pycom03g06080	Myb_box5_MYB	1.7548	-714	-709
pycom03g06080	Myb_box5_MYB	1.7548	-668	-663
pycom03g06080	Myb_box5_MYB	1.7548	-541	-536
pycom03g06080	N_box_bHLH	2.9603	-671	-666
pycom03g06080	Myb_box3_MYB	1.8823	-322	-317
pycom03g06080	Myb_box1_MYB	1.8746	-714	-709
pycom03g06080	Myb_box1_MYB	1.8746	-668	-663
pycom03g06080	Myb_box1_MYB	1.8746	-541	-536
pycom03g06080	G_box_bHLH	2.9372	-895	-890
pycom03g06080	Nac_box_NAC	2.4695	-819	-814
pycom03g06080	G_box2_bZIP	1.8722	-475	-470
pycom03g06080	W_box_WRKY	1.9363	-84	-79
Gene	TF_Name	Z-Score	Start	End
pycom03g06450	G_box2_bZIP	2.0055	-888	-883
pycom03g06450	G_box2_bZIP	2.0055	-298	-293
pycom03g06450	DREB_AP2_EREBP	2.6031	-7	-2
pycom03g06450	Myb_box1_MYB	2.7477	-733	-728
pycom03g06450	Myb_box3_MYB	2.0106	-166	-161
pycom03g06450	Myb_box3_MYB	2.0106	-743	-738
pycom03g06450	Myb_box5_MYB	2.7126	-733	-728
Gene	TF_Name	Z-Score	Start	End
pycom03g06530	AuxRE_ARF	2.519	-673	-668
pycom03g06530	AuxRE_ARF	2.519	-662	-657
pycom03g06530	W_box_WRKY	2.0235	-498	-493
pycom03g06530	Myb_box1_MYB	2.7104	-377	-372
pycom03g06530	Myb_box3_MYB	1.9447	-982	-977
pycom03g06530	Myb_box2_MYB	2.589	-484	-479
pycom03g06530	G_box2_bZIP	1.9471	-405	-400
pycom03g06530	Myb_box5_MYB	2.6619	-377	-372
Gene	TF_Name	Z-Score	Start	End
pycom03g06960	Myb_box2_MYB	2.3925	-156	-151
pycom03g06960	Myb_box2_MYB	2.3925	-113	-108
pycom03g06960	Myb_box5_MYB	2.3656	-977	-972
pycom03g06960	G_box2_bZIP	2.5328	-177	-172
pycom03g06960	Myb_box1_MYB	1.7834	-979	-974
pycom03g06960	Nac_box_NAC	2.4459	-649	-644
pycom03g06960	N_box_bHLH	2.2802	-828	-823
Gene	TF_Name	Z-Score	Start	End
pycom03g07230	AuxRE_ARF	2.5673	-881	-876
pycom03g07230	AuxRE_ARF	2.5673	-130	-125
pycom03g07230	W_box_WRKY	2.0323	-868	-863
pycom03g07230	Myb_box3_MYB	1.9592	-822	-817
pycom03g07230	Myb_box1_MYB	1.973	-186	-181
pycom03g07230	Nac_box_NAC	2.5359	-708	-703
pycom03g07230	Nac_box_NAC	2.5359	-523	-518
pycom03g07230	Nac_box_NAC	2.5359	-552	-547
pycom03g07230	Nac_box_NAC	2.5359	-657	-652
pycom03g07230	Nac_box_NAC	2.5359	-569	-564
pycom03g07230	Nac_box_NAC	2.5359	-729	-724
pycom03g07230	Myb_box5_MYB	1.9444	-188	-183
pycom03g07230	Myb_box5_MYB	1.9444	-186	-181
pycom03g07230	Myb_box5_MYB	1.9444	-209	-204
pycom03g07230	Myb_box5_MYB	1.9444	-970	-965
pycom03g07230	Myb_box5_MYB	1.9444	-972	-967
pycom03g07230	G_box2_bZIP	1.934	-779	-774
Gene	TF_Name	Z-Score	Start	End
pycom03g07770	Myb_box1_MYB	3.0291	-992	-987
pycom03g07770	Myb_box5_MYB	2.9343	-992	-987
pycom03g07770	G_box2_bZIP	2.3088	-425	-420
pycom03g07770	G_box2_bZIP	2.3088	-257	-252
pycom03g07770	N_box_bHLH	2.8399	-8	-3
pycom03g07770	W_box_WRKY	2.37	-84	-79
Gene	TF_Name	Z-Score	Start	End
pycom04g03280	Myb_box1_MYB	2.2735	-171	-166
pycom04g03280	Myb_box1_MYB	2.2735	-213	-208
pycom04g03280	G_box_bHLH	3.4758	-952	-947
pycom04g03280	Myb_box3_MYB	2.2723	-907	-902
pycom04g03280	Myb_box3_MYB	2.2723	-336	-331
pycom04g03280	W_box_WRKY	2.3636	-890	-885
pycom04g03280	AuxRE_ARF	2.9643	-925	-920
pycom04g03280	Myb_box5_MYB	2.1595	-171	-166
pycom04g03280	Myb_box5_MYB	2.1595	-213	-208
pycom04g03280	Myb_box5_MYB	2.1595	-526	-521
pycom04g03280	Myb_box5_MYB	2.1595	-672	-667
pycom04g03280	Myb_box5_MYB	2.1595	-524	-519
pycom04g03280	G_box2_bZIP	3.0119	-50	-45
Gene	TF_Name	Z-Score	Start	End
pycom04g03540	N_box_bHLH	2.7517	-459	-454
pycom04g03540	G_box2_bZIP	2.0811	-812	-807
pycom04g03540	Myb_box1_MYB	2.9048	-409	-404
pycom04g03540	Myb_box5_MYB	2.8968	-409	-404
Gene	TF_Name	Z-Score	Start	End
pycom04g03800	Myb_box2_MYB	3.0095	-48	-43
pycom04g03800	Myb_box3_MYB	2.4652	-260	-255
pycom04g03800	Myb_box1_MYB	1.721	-260	-255
pycom04g03800	Myb_box5_MYB	2.2957	-660	-655
Gene	TF_Name	Z-Score	Start	End
pycom04g05140	W_box_WRKY	2.164	-9	-4
pycom04g05140	DREB_AP2_EREBP	2.5451	-68	-63
pycom04g05140	Nac_box_NAC	2.684	-873	-868
pycom04g05140	Myb_box4_MYB	2.5743	-282	-276
pycom04g05140	Myb_box2_MYB	2.7176	-13	-8
pycom04g05140	Myb_box1_MYB	2.7523	-224	-219
pycom04g05140	Myb_box5_MYB	2.6429	-224	-219
pycom04g05140	N_box_bHLH	2.5492	-322	-317
pycom04g05140	G_box2_bZIP	2.0876	-188	-183
Gene	TF_Name	Z-Score	Start	End
pycom04g09390	G_box_bHLH	3.1757	-502	-497
pycom04g09390	Myb_box1_MYB	2.078	-168	-163
pycom04g09390	N_box_bHLH	3.2316	-586	-581
pycom04g09390	Myb_box5_MYB	1.9754	-168	-163
pycom04g09390	DREB_AP2_EREBP	2.6079	-194	-189
Gene	TF_Name	Z-Score	Start	End
pycom04g10230	Myb_box5_MYB	3.0247	-481	-476
pycom04g10230	Myb_box5_MYB	3.0247	-221	-216
pycom04g10230	W_box_WRKY	1.5123	-190	-185
pycom04g10230	W_box_WRKY	1.5123	-318	-313
pycom04g10230	Myb_box1_MYB	3.0681	-481	-476
Gene	TF_Name	Z-Score	Start	End
pycom04g11930	Myb_box5_MYB	2.4475	-321	-316
pycom04g11930	Myb_box4_MYB	2.3373	-973	-967
pycom04g11930	Myb_box1_MYB	1.8316	-253	-248
pycom04g11930	Myb_box2_MYB	2.4605	-240	-235
pycom04g11930	G_box2_bZIP	1.864	-361	-356
pycom04g11930	G_box2_bZIP	1.864	-838	-833
pycom04g11930	G_box2_bZIP	1.864	-710	-705
Gene	TF_Name	Z-Score	Start	End
pycom04g12150	Myb_box5_MYB	3.0301	-742	-737
pycom04g12150	Myb_box4_MYB	2.9141	-961	-955
pycom04g12150	Nac_box_NAC	2.9408	-514	-509
pycom04g12150	Nac_box_NAC	2.9408	-453	-448
pycom04g12150	W_box_WRKY	2.3534	-730	-725
pycom04g12150	G_box_bHLH	3.556	-489	-484
pycom04g12150	HSE1_HSF	1.7481	-340	-333
pycom04g12150	Myb_box2_MYB	2.9546	-315	-310
pycom04g12150	Myb_box1_MYB	2.2812	-156	-151
Gene	TF_Name	Z-Score	Start	End
pycom04g12430	W_box_WRKY	2.0843	-381	-376
pycom04g12430	Myb_box5_MYB	1.988	-194	-189
pycom04g12430	N_box_bHLH	3.2385	-519	-514
pycom04g12430	G_ABRE_bZIP	2.8528	-350	-343
pycom04g12430	G_box2_bZIP	2.0172	-782	-777
pycom04g12430	G_box2_bZIP	2.0172	-121	-116
Gene	TF_Name	Z-Score	Start	End
pycom04g13870	N_box_bHLH	2.3619	-157	-152
pycom04g13870	N_box_bHLH	2.3619	-393	-388
pycom04g13870	Myb_box2_MYB	2.2309	-238	-233
pycom04g13870	Myb_box2_MYB	2.2309	-151	-146
pycom04g13870	Myb_box5_MYB	2.4487	-237	-232
pycom04g13870	Myb_box5_MYB	2.4487	-206	-201
Gene	TF_Name	Z-Score	Start	End
pycom04g14080	N_box_bHLH	3.3283	-183	-178
pycom04g14080	Myb_box5_MYB	2.7726	-650	-645
pycom04g14080	Myb_box1_MYB	1.9677	-984	-979
pycom04g14080	Myb_box1_MYB	1.9677	-218	-213
pycom04g14080	Myb_box2_MYB	2.5584	-796	-791
pycom04g14080	Myb_box2_MYB	2.5584	-481	-476
pycom04g14080	Myb_box2_MYB	2.5584	-487	-482
pycom04g14080	Myb_box2_MYB	2.5584	-415	-410
pycom04g14080	W_box_WRKY	2.0254	-213	-208
Gene	TF_Name	Z-Score	Start	End
pycom04g14890	AuxRE_ARF	2.4342	-90	-85
pycom04g14890	AuxRE_ARF	2.4342	-93	-88
pycom04g14890	N_box_bHLH	3.078	-931	-926
pycom04g14890	N_box_bHLH	3.078	-933	-928
pycom04g14890	Myb_box5_MYB	1.773	-282	-277
pycom04g14890	Myb_box5_MYB	1.773	-401	-396
pycom04g14890	Myb_box5_MYB	1.773	-998	-993
pycom04g14890	HBE_HB	1.8835	-846	-838
pycom04g14890	GCC_box_AP2_EREBP	3.8817	-257	-252
pycom04g14890	W_box_WRKY	1.9668	-810	-805
pycom04g14890	W_box_WRKY	1.9668	-203	-198
pycom04g14890	C_ABRE_bZIP	3.5102	-544	-539
pycom04g14890	Myb_box2_MYB	2.4914	-250	-245
Gene	TF_Name	Z-Score	Start	End
pycom04g15390	G_box2_bZIP	2.1545	-335	-330
pycom04g15390	HBE_HB	1.5402	-286	-278
pycom04g15390	Myb_box3_MYB	2.1492	-514	-509
pycom04g15390	Myb_box3_MYB	2.1492	-215	-210
pycom04g15390	G_box_bHLH	3.3742	-700	-695
Gene	TF_Name	Z-Score	Start	End
pycom04g16360	AuxRE_ARF	2.5553	-575	-570
pycom04g16360	AuxRE_ARF	2.5553	-578	-573
pycom04g16360	G_box2_bZIP	2.6529	-114	-109
pycom04g16360	W_box_WRKY	2.0173	-501	-496
pycom04g16360	Myb_box2_MYB	2.5727	-220	-215
pycom04g16360	Nac_box_NAC	2.5707	-279	-274
pycom04g16360	Myb_box1_MYB	2.6959	-743	-738
pycom04g16360	Myb_box5_MYB	2.6267	-221	-216
pycom04g16360	Myb_box5_MYB	2.6267	-743	-738
pycom04g16360	DREB_AP2_EREBP	3.1594	-481	-476
Gene	TF_Name	Z-Score	Start	End
pycom04g20660	G_box2_bZIP	2.1207	-943	-938
pycom04g20660	G_box2_bZIP	2.1207	-975	-970
pycom04g20660	Myb_box5_MYB	2.8338	-913	-908
pycom04g20660	W_box_WRKY	2.266	-813	-808
pycom04g20660	Myb_box1_MYB	2.9	-913	-908
Gene	TF_Name	Z-Score	Start	End
pycom04g20870	W_box_WRKY	1.5495	-698	-693
pycom04g20870	DREB_AP2_EREBP	3.002	-366	-361
pycom04g20870	Myb_box1_MYB	3.139	-847	-842
pycom04g20870	Myb_box5_MYB	3.0816	-847	-842
Gene	TF_Name	Z-Score	Start	End
pycom04g21120	Myb_box1_MYB	1.9905	-659	-654
pycom04g21120	Myb_box1_MYB	1.9905	-664	-659
pycom04g21120	Myb_box1_MYB	1.9905	-836	-831
pycom04g21120	Myb_box5_MYB	2.6697	-97	-92
pycom04g21120	G_box_bHLH	3.1713	-80	-75
pycom04g21120	C_ABRE_bZIP	3.671	-313	-308
pycom04g21120	W_box_WRKY	2.0314	-886	-881
Gene	TF_Name	Z-Score	Start	End
pycom04g21180	AuxRE_ARF	2.7897	-905	-900
pycom04g21180	Myb_box5_MYB	2.0747	-109	-104
pycom04g21180	Myb_box5_MYB	2.0747	-111	-106
pycom04g21180	Myb_box5_MYB	2.0747	-858	-853
pycom04g21180	Myb_box5_MYB	2.0747	-694	-689
pycom04g21180	DREB_AP2_EREBP	3.4046	-20	-15
Gene	TF_Name	Z-Score	Start	End
pycom04g21620	Myb_box5_MYB	2.772	-369	-364
pycom04g21620	N_box_bHLH	3.3346	-252	-247
pycom04g21620	Myb_box1_MYB	2.7831	-369	-364
pycom04g21620	C_ABRE_bZIP	3.7465	-419	-414
pycom04g21620	G_box2_bZIP	2.0411	-859	-854
pycom04g21620	G_box2_bZIP	2.0411	-596	-591
pycom04g21620	W_box_WRKY	2.1366	-168	-163
pycom04g21620	W_box_WRKY	2.1366	-557	-552
Gene	TF_Name	Z-Score	Start	End
pycom05g00520	Nac_box_NAC	2.9129	-147	-142
pycom05g00520	DREB_AP2_EREBP	2.9373	-525	-520
pycom05g00520	Myb_box4_MYB	2.9961	-699	-693
pycom05g00520	AuxRE_ARF	2.8298	-77	-72
pycom05g00520	Myb_box5_MYB	2.244	-385	-380
Gene	TF_Name	Z-Score	Start	End
pycom05g12270	Myb_box1_MYB	2.0404	-594	-589
pycom05g12270	C_ABRE_bZIP	3.5641	-238	-233
pycom05g12270	DREB_AP2_EREBP	2.5109	-83	-78
pycom05g12270	GCC_box_AP2_EREBP	3.7489	-7	-2
pycom05g12270	Myb_box3_MYB	2.0187	-653	-648
pycom05g12270	Myb_box2_MYB	2.4701	-539	-534
pycom05g12270	Myb_box2_MYB	2.4701	-86	-81
pycom05g12270	Myb_box5_MYB	2.5962	-85	-80
Gene	TF_Name	Z-Score	Start	End
pycom05g12580	Myb_box1_MYB	2.3239	-164	-159
pycom05g12580	Myb_box5_MYB	2.197	-504	-499
pycom05g12580	Myb_box5_MYB	2.197	-162	-157
pycom05g12580	Myb_box5_MYB	2.197	-164	-159
pycom05g12580	W_box_WRKY	2.3693	-29	-24
pycom05g12580	Myb_box2_MYB	2.8922	-60	-55
Gene	TF_Name	Z-Score	Start	End
pycom05g12960	Myb_box5_MYB	1.8765	-536	-531
pycom05g12960	Myb_box5_MYB	1.8765	-919	-914
pycom05g12960	Myb_box5_MYB	1.8765	-921	-916
pycom05g12960	Myb_box5_MYB	1.8765	-969	-964
pycom05g12960	Myb_box5_MYB	1.8765	-283	-278
pycom05g12960	Myb_box1_MYB	2.0146	-919	-914
pycom05g12960	N_box_bHLH	2.5191	-234	-229
pycom05g12960	Myb_box4_MYB	2.5274	-191	-185
Gene	TF_Name	Z-Score	Start	End
pycom05g19130	G_box2_bZIP	2.1722	-374	-369
pycom05g19130	G_box2_bZIP	2.1722	-670	-665
pycom05g19130	G_box2_bZIP	2.1722	-572	-567
pycom05g19130	Nac_box_NAC	2.8216	-553	-548
pycom05g19130	Myb_box5_MYB	2.9176	-690	-685
pycom05g19130	Myb_box4_MYB	2.7239	-795	-789
Gene	TF_Name	Z-Score	Start	End
pycom05g28450	Myb_box5_MYB	1.6373	-925	-920
pycom05g28450	Myb_box5_MYB	1.6373	-1000	-995
pycom05g28450	Myb_box5_MYB	1.6373	-998	-993
pycom05g28450	Nac_box_NAC	2.3975	-640	-635
pycom05g28450	Myb_box2_MYB	2.2713	-139	-134
pycom05g28450	Myb_box2_MYB	2.2713	-232	-227
pycom05g28450	Myb_box2_MYB	2.2713	-273	-268
pycom05g28450	Myb_box2_MYB	2.2713	-263	-258
pycom05g28450	Myb_box2_MYB	2.2713	-179	-174
pycom05g28450	Myb_box2_MYB	2.2713	-222	-217
pycom05g28450	Myb_box2_MYB	2.2713	-169	-164
pycom05g28450	DREB_AP2_EREBP	3.0164	-186	-181
pycom05g28450	DREB_AP2_EREBP	3.0164	-299	-294
pycom05g28450	DREB_AP2_EREBP	3.0164	-239	-234
pycom05g28450	DREB_AP2_EREBP	3.0164	-280	-275
pycom05g28450	Myb_box4_MYB	2.233	-535	-529
Gene	TF_Name	Z-Score	Start	End
pycom06g01550	W_box_WRKY	2.3229	-16	-11
pycom06g01550	AuxRE_ARF	2.8867	-359	-354
pycom06g01550	Myb_box5_MYB	2.3012	-80	-75
pycom06g01550	Myb_box3_MYB	2.2442	-919	-914
pycom06g01550	Myb_box3_MYB	2.2442	-575	-570
pycom06g01550	Myb_box3_MYB	2.2442	-86	-81
pycom06g01550	Myb_box1_MYB	2.3102	-80	-75
Gene	TF_Name	Z-Score	Start	End
pycom06g01570	N_box_bHLH	3.7588	-393	-388
pycom06g01570	N_box_bHLH	3.7588	-970	-965
pycom06g01570	Myb_box5_MYB	3.1529	-973	-968
pycom06g01570	W_box_WRKY	1.9054	-313	-308
pycom06g01570	DREB_AP2_EREBP	3.7653	-949	-944
pycom06g01570	Myb_box4_MYB	3.0107	-20	-14
pycom06g01570	Myb_box1_MYB	3.3143	-973	-968
Gene	TF_Name	Z-Score	Start	End
pycom06g11450	W_box_WRKY	1.8576	-200	-195
pycom06g11450	Myb_box3_MYB	1.6683	-337	-332
Gene	TF_Name	Z-Score	Start	End
pycom06g11610	AuxRE_ARF	2.5084	-783	-778
pycom06g11610	Myb_box4_MYB	2.597	-61	-55
pycom06g11610	Myb_box1_MYB	2.0356	-216	-211
pycom06g11610	Myb_box5_MYB	2.7366	-466	-461
Gene	TF_Name	Z-Score	Start	End
pycom06g11830	G_box_bHLH	3.8325	-674	-669
pycom06g11830	Myb_box5_MYB	2.4293	-377	-372
pycom06g11830	Myb_box5_MYB	2.4293	-650	-645
pycom06g11830	Myb_box5_MYB	2.4293	-818	-813
pycom06g11830	W_box_WRKY	1.8758	-803	-798
pycom06g11830	W_box_WRKY	1.8758	-339	-334
pycom06g11830	Myb_box1_MYB	2.5641	-818	-813
pycom06g11830	Myb_box1_MYB	2.5641	-650	-645
pycom06g11830	Nac_box_NAC	3.2102	-373	-368
pycom06g11830	Nac_box_NAC	3.2102	-422	-417
Gene	TF_Name	Z-Score	Start	End
pycom06g19780	Myb_box5_MYB	1.9271	-68	-63
pycom06g19780	Myb_box5_MYB	1.9271	-431	-426
pycom06g19780	Myb_box5_MYB	1.9271	-70	-65
pycom06g19780	Myb_box1_MYB	2.0384	-431	-426
pycom06g19780	G_box2_bZIP	2.0514	-37	-32
pycom06g19780	Myb_box2_MYB	2.7317	-399	-394
pycom06g19780	Myb_box3_MYB	2.0433	-536	-531
Gene	TF_Name	Z-Score	Start	End
pycom07g20140	DREB_AP2_EREBP	3.3182	-979	-974
pycom07g20140	Myb_box5_MYB	2.0006	-54	-49
pycom07g20140	Myb_box5_MYB	2.0006	-115	-110
pycom07g20140	Myb_box5_MYB	2.0006	-83	-78
pycom07g20140	Myb_box5_MYB	2.0006	-578	-573
pycom07g20140	Myb_box5_MYB	2.0006	-576	-571
pycom07g20140	AuxRE_ARF	2.7179	-913	-908
pycom07g20140	AuxRE_ARF	2.7179	-916	-911
pycom07g20140	N_box_bHLH	3.309	-111	-106
pycom07g20140	Myb_box2_MYB	2.7885	-932	-927
pycom07g20140	Myb_box2_MYB	2.7885	-577	-572
pycom07g20140	Myb_box1_MYB	2.106	-54	-49
Gene	TF_Name	Z-Score	Start	End
pycom07g20220	Myb_box1_MYB	1.5119	-312	-307
pycom07g20220	Myb_box1_MYB	1.5119	-586	-581
pycom07g20220	Myb_box1_MYB	1.5119	-878	-873
pycom07g20220	Myb_box5_MYB	2.1061	-76	-71
pycom07g20220	Myb_box5_MYB	2.1061	-746	-741
pycom07g20220	N_box_bHLH	3.4823	-285	-280
pycom07g20220	DREB_AP2_EREBP	2.819	-895	-890
pycom07g20220	Myb_box3_MYB	2.2507	-312	-307
pycom07g20220	Myb_box3_MYB	2.2507	-586	-581
pycom07g20220	Myb_box3_MYB	2.2507	-878	-873
pycom07g20220	W_box_WRKY	1.56	-348	-343
Gene	TF_Name	Z-Score	Start	End
pycom07g20590	AuxRE_ARF	2.3972	-156	-151
pycom07g20590	G_box2_bZIP	1.694	-575	-570
pycom07g20590	Myb_box5_MYB	1.6051	-941	-936
pycom07g20590	Myb_box3_MYB	1.7235	-489	-484
pycom07g20590	N_box_bHLH	2.8837	-845	-840
pycom07g20590	W_box_WRKY	1.8391	-59	-54
pycom07g20590	W_box_WRKY	1.8391	-318	-313
pycom07g20590	G_box_bHLH	2.8914	-793	-788
Gene	TF_Name	Z-Score	Start	End
pycom07g25490	DREB_AP2_EREBP	2.8959	-24	-19
pycom07g25490	AuxRE_ARF	2.3661	-105	-100
pycom07g25490	C_ABRE_bZIP	3.3931	-451	-446
pycom07g25490	W_box_WRKY	1.8708	-478	-473
pycom07g25490	Myb_box5_MYB	2.3901	-418	-413
pycom07g25490	Myb_box1_MYB	2.4826	-418	-413
pycom07g25490	N_box_bHLH	2.2929	-407	-402
pycom07g25490	N_box_bHLH	2.2929	-496	-491
pycom07g25490	Myb_box3_MYB	1.8114	-719	-714
pycom07g25490	Myb_box3_MYB	1.8114	-299	-294
pycom07g25490	GCC_box_AP2_EREBP	3.7032	-21	-16
pycom07g25490	GCC_box_AP2_EREBP	3.7032	-19	-14
pycom07g25490	GCC_box_AP2_EREBP	3.7032	-22	-17
Gene	TF_Name	Z-Score	Start	End
pycom07g25640	AuxRE_ARF	2.7373	-499	-494
pycom07g25640	Myb_box5_MYB	1.9953	-464	-459
pycom07g25640	Myb_box5_MYB	1.9953	-925	-920
pycom07g25640	Myb_box5_MYB	1.9953	-703	-698
pycom07g25640	G_box2_bZIP	2.0153	-903	-898
pycom07g25640	Myb_box3_MYB	2.0172	-27	-22
pycom07g25640	Myb_box2_MYB	2.9986	-722	-717
pycom07g25640	DREB_AP2_EREBP	2.7587	-725	-720
pycom07g25640	W_box_WRKY	2.1491	-717	-712
pycom07g25640	Nac_box_NAC	2.6062	-889	-884
pycom07g25640	Myb_box1_MYB	2.0135	-464	-459
pycom07g25640	Myb_box1_MYB	2.0135	-925	-920
pycom07g25640	Myb_box1_MYB	2.0135	-703	-698
Gene	TF_Name	Z-Score	Start	End
pycom07g25810	G_box1_bZIP	3.362	-693	-686
pycom07g25810	W_box_WRKY	1.6872	-851	-846
pycom07g25810	Myb_box3_MYB	1.6803	-181	-176
pycom07g25810	Myb_box3_MYB	1.6803	-445	-440
pycom07g25810	Myb_box5_MYB	1.593	-884	-879
pycom07g25810	G_box_bHLH	2.7438	-812	-807
pycom07g25810	G_box_bHLH	2.7438	-692	-687
Gene	TF_Name	Z-Score	Start	End
pycom08g00280	Myb_box1_MYB	2.6526	-583	-578
pycom08g00280	G_box_bHLH	3.1379	-335	-330
pycom08g00280	Myb_box5_MYB	2.5259	-583	-578
pycom08g00280	Myb_box3_MYB	1.9787	-354	-349
pycom08g00280	Myb_box3_MYB	1.9787	-495	-490
pycom08g00280	Myb_box4_MYB	2.4325	-589	-583
pycom08g00280	N_box_bHLH	3.0682	-27	-22
pycom08g00280	W_box_WRKY	2.105	-119	-114
pycom08g00280	Myb_box2_MYB	2.5417	-321	-316
Gene	TF_Name	Z-Score	Start	End
pycom08g03100	Myb_box5_MYB	2.3497	-692	-687
pycom08g03100	Myb_box2_MYB	2.2953	-420	-415
pycom08g03100	Myb_box2_MYB	2.2953	-637	-632
pycom08g03100	C_ABRE_bZIP	3.2849	-188	-183
pycom08g03100	Nac_box_NAC	2.3117	-191	-186
pycom08g03100	G_box_bHLH	2.8233	-350	-345
pycom08g03100	DREB_AP2_EREBP	2.8788	-278	-273
pycom08g03100	Myb_box1_MYB	1.7093	-713	-708
Gene	TF_Name	Z-Score	Start	End
pycom08g03240	W_box_WRKY	1.5099	-453	-448
pycom08g03240	Myb_box5_MYB	2.0984	-614	-609
pycom08g03240	Myb_box5_MYB	2.0984	-58	-53
pycom08g03240	DREB_AP2_EREBP	2.8498	-612	-607
Gene	TF_Name	Z-Score	Start	End
pycom08g04150	N_box_bHLH	1.6483	-908	-903
pycom08g04150	Myb_box5_MYB	1.763	-334	-329
pycom08g04150	Myb_box5_MYB	1.763	-742	-737
pycom08g04150	Myb_box5_MYB	1.763	-205	-200
pycom08g04150	Myb_box5_MYB	1.763	-92	-87
pycom08g04150	Myb_box2_MYB	1.6867	-204	-199
pycom08g04150	Myb_box2_MYB	1.6867	-922	-917
pycom08g04150	C_ABRE_bZIP	2.7021	-961	-956
pycom08g04150	DREB_AP2_EREBP	2.2293	-194	-189
pycom08g04150	DREB_AP2_EREBP	2.2293	-253	-248
pycom08g04150	DREB_AP2_EREBP	2.2293	-382	-377
pycom08g04150	GCC_box_AP2_EREBP	2.935	-192	-187
pycom08g04150	GCC_box_AP2_EREBP	2.935	-123	-118
pycom08g04150	GCC_box_AP2_EREBP	2.935	-189	-184
pycom08g04150	GCC_box_AP2_EREBP	2.935	-34	-29
pycom08g04150	GCC_box_AP2_EREBP	2.935	-191	-186
pycom08g04150	GCC_box_AP2_EREBP	2.935	-244	-239
Gene	TF_Name	Z-Score	Start	End
pycom08g04440	N_box_bHLH	2.1549	-10	-5
pycom08g04440	Myb_box4_MYB	2.0486	-815	-809
pycom08g04440	Myb_box4_MYB	2.0486	-885	-879
pycom08g04440	G_box2_bZIP	2.3607	-268	-263
pycom08g04440	G_box2_bZIP	2.3607	-437	-432
pycom08g04440	AuxRE_ARF	2.3301	-416	-411
pycom08g04440	Myb_box1_MYB	1.6351	-992	-987
pycom08g04440	DREB_AP2_EREBP	2.1609	-330	-325
pycom08g04440	W_box_WRKY	1.7361	-647	-642
Gene	TF_Name	Z-Score	Start	End
pycom08g04720	W_box_WRKY	1.528	-876	-871
pycom08g04720	Myb_box5_MYB	2.0244	-846	-841
pycom08g04720	G_box_bHLH	3.3999	-761	-756
pycom08g04720	Nac_box_NAC	2.8594	-823	-818
pycom08g04720	Nac_box_NAC	2.8594	-358	-353
pycom08g04720	Nac_box_NAC	2.8594	-772	-767
pycom08g04720	Myb_box1_MYB	2.1848	-846	-841
pycom08g04720	G_box2_bZIP	2.2229	-351	-346
Gene	TF_Name	Z-Score	Start	End
pycom08g05000	Nac_box_NAC	3.116	-922	-917
pycom08g05000	Nac_box_NAC	3.116	-371	-366
pycom08g05000	W_box_WRKY	2.47	-352	-347
pycom08g05000	W_box_WRKY	2.47	-309	-304
pycom08g05000	Myb_box5_MYB	3.1525	-286	-281
pycom08g05000	Myb_box1_MYB	2.4715	-284	-279
Gene	TF_Name	Z-Score	Start	End
pycom08g05190	DREB_AP2_EREBP	2.6852	-903	-898
pycom08g05190	Myb_box2_MYB	2.6857	-960	-955
pycom08g05190	G_box2_bZIP	2.8202	-387	-382
pycom08g05190	G_box2_bZIP	2.8202	-755	-750
pycom08g05190	Myb_box1_MYB	2.8616	-296	-291
pycom08g05190	Myb_box5_MYB	2.7712	-296	-291
pycom08g05190	Nac_box_NAC	2.7776	-482	-477
Gene	TF_Name	Z-Score	Start	End
pycom08g07690	Myb_box1_MYB	2.6933	-365	-360
pycom08g07690	G_box2_bZIP	1.9718	-16	-11
pycom08g07690	G_box_bHLH	3.1072	-269	-264
pycom08g07690	Myb_box3_MYB	1.9764	-983	-978
pycom08g07690	G_box1_bZIP	3.7483	-270	-263
pycom08g07690	W_box_WRKY	1.9912	-345	-340
pycom08g07690	DREB_AP2_EREBP	3.1572	-102	-97
pycom08g07690	AuxRE_ARF	2.4426	-138	-133
pycom08g07690	AuxRE_ARF	2.4426	-404	-399
pycom08g07690	Myb_box5_MYB	2.634	-865	-860
pycom08g07690	Myb_box5_MYB	2.634	-365	-360
Gene	TF_Name	Z-Score	Start	End
pycom08g07980	Myb_box5_MYB	1.8966	-797	-792
pycom08g07980	Myb_box5_MYB	1.8966	-398	-393
pycom08g07980	Myb_box1_MYB	2.0363	-398	-393
pycom08g07980	G_box_bHLH	3.1747	-589	-584
pycom08g07980	G_box_bHLH	3.1747	-592	-587
pycom08g07980	N_box_bHLH	3.191	-933	-928
Gene	TF_Name	Z-Score	Start	End
pycom08g11660	GCC_box_AP2_EREBP	4.6816	-807	-802
pycom08g11660	DREB_AP2_EREBP	3.7066	-809	-804
pycom08g11660	Nac_box_NAC	3.0525	-306	-301
pycom08g11660	Myb_box2_MYB	3.0063	-311	-306
pycom08g11660	Myb_box5_MYB	3.1294	-64	-59
pycom08g11660	Myb_box1_MYB	2.4473	-795	-790
Gene	TF_Name	Z-Score	Start	End
pycom08g13180	DREB_AP2_EREBP	2.9566	-401	-396
pycom08g13180	Nac_box_NAC	2.4442	-236	-231
pycom08g13180	Myb_box2_MYB	2.3622	-133	-128
pycom08g13180	Myb_box5_MYB	1.7453	-572	-567
Gene	TF_Name	Z-Score	Start	End
pycom08g18340	Myb_box3_MYB	2.2401	-391	-386
pycom08g18340	Myb_box1_MYB	2.9962	-206	-201
pycom08g18340	Nac_box_NAC	2.8356	-774	-769
pycom08g18340	G_box_bHLH	3.4209	-220	-215
pycom08g18340	Myb_box2_MYB	2.8566	-378	-373
pycom08g18340	Myb_box2_MYB	2.8566	-103	-98
pycom08g18340	Myb_box5_MYB	2.921	-206	-201
Gene	TF_Name	Z-Score	Start	End
pycom08g19390	DREB_AP2_EREBP	3.0855	-322	-317
pycom08g19390	W_box_WRKY	1.6005	-910	-905
pycom08g19390	Nac_box_NAC	2.8436	-678	-673
pycom08g19390	Nac_box_NAC	2.8436	-478	-473
pycom08g19390	Myb_box5_MYB	3.1822	-818	-813
pycom08g19390	Myb_box1_MYB	3.1268	-818	-813
Gene	TF_Name	Z-Score	Start	End
pycom08g20230	Myb_box3_MYB	1.8934	-8	-3
pycom08g20230	DREB_AP2_EREBP	2.5289	-859	-854
pycom08g20230	Myb_box2_MYB	2.6378	-856	-851
pycom08g20230	N_box_bHLH	2.5319	-30	-25
pycom08g20230	Myb_box5_MYB	2.6538	-857	-852
pycom08g20230	Myb_box1_MYB	1.8847	-155	-150
pycom08g20230	Myb_box1_MYB	1.8847	-544	-539
pycom08g20230	Myb_box1_MYB	1.8847	-719	-714
Gene	TF_Name	Z-Score	Start	End
pycom08g20940	W_box_WRKY	2.4252	-124	-119
pycom08g20940	W_box_WRKY	2.4252	-132	-127
pycom08g20940	Myb_box5_MYB	2.3735	-596	-591
pycom08g20940	Myb_box5_MYB	2.3735	-460	-455
Gene	TF_Name	Z-Score	Start	End
pycom08g20980	Myb_box5_MYB	1.8996	-249	-244
pycom08g20980	Myb_box5_MYB	1.8996	-107	-102
pycom08g20980	Myb_box5_MYB	1.8996	-287	-282
pycom08g20980	Myb_box5_MYB	1.8996	-206	-201
pycom08g20980	Myb_box5_MYB	1.8996	-35	-30
pycom08g20980	Myb_box1_MYB	2	-107	-102
pycom08g20980	Myb_box1_MYB	2	-35	-30
pycom08g20980	AuxRE_ARF	2.5481	-372	-367
pycom08g20980	Myb_box2_MYB	2.6391	-334	-329
Gene	TF_Name	Z-Score	Start	End
pycom08g21050	Myb_box5_MYB	2.3619	-546	-541
pycom08g21050	Myb_box5_MYB	2.3619	-693	-688
pycom08g21050	Myb_box5_MYB	2.3619	-72	-67
pycom08g21050	Myb_box5_MYB	2.3619	-211	-206
pycom08g21050	Myb_box1_MYB	1.7284	-774	-769
pycom08g21050	Myb_box1_MYB	1.7284	-793	-788
pycom08g21050	W_box_WRKY	1.7931	-372	-367
pycom08g21050	Myb_box3_MYB	2.4439	-774	-769
pycom08g21050	Myb_box3_MYB	2.4439	-793	-788
Gene	TF_Name	Z-Score	Start	End
pycom09g00070	Myb_box5_MYB	1.8531	-54	-49
pycom09g00070	Myb_box5_MYB	1.8531	-574	-569
pycom09g00070	Myb_box5_MYB	1.8531	-56	-51
pycom09g00070	Myb_box5_MYB	1.8531	-970	-965
pycom09g00070	Myb_box5_MYB	1.8531	-284	-279
pycom09g00070	Myb_box5_MYB	1.8531	-572	-567
pycom09g00070	Myb_box2_MYB	2.6453	-649	-644
pycom09g00070	Myb_box1_MYB	1.9683	-54	-49
pycom09g00070	Myb_box1_MYB	1.9683	-284	-279
Gene	TF_Name	Z-Score	Start	End
pycom09g00850	Myb_box5_MYB	2.9695	-67	-62
pycom09g00850	Myb_box5_MYB	2.9695	-639	-634
pycom09g00850	HBE_HB	2.2079	-657	-649
pycom09g00850	Myb_box1_MYB	2.9298	-67	-62
pycom09g00850	Nac_box_NAC	2.7441	-623	-618
Gene	TF_Name	Z-Score	Start	End
pycom09g01100	Myb_box3_MYB	1.8992	-428	-423
pycom09g01100	Myb_box5_MYB	1.785	-967	-962
pycom09g01100	Myb_box5_MYB	1.785	-965	-960
pycom09g01100	AuxRE_ARF	2.3673	-847	-842
pycom09g01100	DREB_AP2_EREBP	2.4098	-536	-531
pycom09g01100	G_box2_bZIP	2.5198	-838	-833
pycom09g01100	GCC_box_AP2_EREBP	3.7636	-197	-192
pycom09g01100	GCC_box_AP2_EREBP	3.7636	-198	-193
Gene	TF_Name	Z-Score	Start	End
pycom09g06360	W_box_WRKY	2.2588	-980	-975
pycom09g06360	Nac_box_NAC	2.8039	-929	-924
pycom09g06360	Nac_box_NAC	2.8039	-538	-533
pycom09g06360	Myb_box5_MYB	2.0949	-650	-645
pycom09g06360	Myb_box5_MYB	2.0949	-693	-688
pycom09g06360	Myb_box5_MYB	2.0949	-870	-865
pycom09g06360	AuxRE_ARF	2.7769	-766	-761
pycom09g06360	Myb_box2_MYB	2.8932	-789	-784
pycom09g06360	Myb_box1_MYB	2.2005	-650	-645
pycom09g06360	Myb_box1_MYB	2.2005	-693	-688
pycom09g06360	Myb_box3_MYB	2.1797	-325	-320
Gene	TF_Name	Z-Score	Start	End
pycom09g06490	DREB_AP2_EREBP	2.6828	-64	-59
pycom09g06490	G_box2_bZIP	2.0516	-313	-308
pycom09g06490	Myb_box5_MYB	2.7803	-635	-630
pycom09g06490	Myb_box5_MYB	2.7803	-655	-650
pycom09g06490	Myb_box1_MYB	2.7644	-635	-630
pycom09g06490	Myb_box1_MYB	2.7644	-655	-650
pycom09g06490	Myb_box3_MYB	2.032	-454	-449
pycom09g06490	Myb_box3_MYB	2.032	-535	-530
pycom09g06490	Nac_box_NAC	2.6539	-13	-8
pycom09g06490	Nac_box_NAC	2.6539	-504	-499
Gene	TF_Name	Z-Score	Start	End
pycom09g06860	Myb_box1_MYB	2.2861	-65	-60
pycom09g06860	C_ABRE_bZIP	3.9535	-828	-823
pycom09g06860	G_box2_bZIP	2.2772	-369	-364
pycom09g06860	Myb_box5_MYB	2.1981	-65	-60
Gene	TF_Name	Z-Score	Start	End
pycom09g07240	N_box_bHLH	2.8451	-97	-92
pycom09g07240	Myb_box4_MYB	2.8291	-922	-916
pycom09g07240	G_box2_bZIP	2.236	-897	-892
pycom09g07240	Myb_box1_MYB	1.5194	-684	-679
pycom09g07240	HBE_HB	1.5697	-840	-832
pycom09g07240	Myb_box3_MYB	2.2318	-684	-679
pycom09g07240	Myb_box5_MYB	2.1552	-925	-920
pycom09g07240	Myb_box5_MYB	2.1552	-634	-629
pycom09g07240	Myb_box5_MYB	2.1552	-991	-986
pycom09g07240	Myb_box5_MYB	2.1552	-354	-349
Gene	TF_Name	Z-Score	Start	End
pycom09g10520	Myb_box5_MYB	1.7718	-272	-267
pycom09g10520	Myb_box5_MYB	1.7718	-379	-374
pycom09g10520	Myb_box5_MYB	1.7718	-89	-84
pycom09g10520	Myb_box5_MYB	1.7718	-33	-28
pycom09g10520	DREB_AP2_EREBP	2.4798	-904	-899
pycom09g10520	Myb_box4_MYB	2.4767	-216	-210
pycom09g10520	Myb_box1_MYB	1.9071	-272	-267
pycom09g10520	Myb_box1_MYB	1.9071	-379	-374
Gene	TF_Name	Z-Score	Start	End
pycom09g10970	Myb_box1_MYB	2.0969	-608	-603
pycom09g10970	Myb_box5_MYB	1.9758	-608	-603
pycom09g10970	Myb_box5_MYB	1.9758	-735	-730
Gene	TF_Name	Z-Score	Start	End
pycom09g19040	Myb_box5_MYB	1.9589	-107	-102
pycom09g19040	Myb_box5_MYB	1.9589	-105	-100
pycom09g19040	Myb_box1_MYB	2.0475	-105	-100
pycom09g19040	W_box_WRKY	2.1493	-614	-609
pycom09g19040	G_box2_bZIP	2.0446	-785	-780
Gene	TF_Name	Z-Score	Start	End
pycom09g19120	Myb_box5_MYB	1.7282	-771	-766
pycom09g19120	G_box_bHLH	3.0245	-200	-195
pycom09g19120	Myb_box1_MYB	1.8301	-771	-766
pycom09g19120	N_box_bHLH	2.4042	-953	-948
pycom09g19120	Myb_box3_MYB	1.819	-416	-411
pycom09g19120	Myb_box3_MYB	1.819	-47	-42
pycom09g19120	DREB_AP2_EREBP	2.4073	-158	-153
pycom09g19120	GCC_box_AP2_EREBP	3.9417	-943	-938
Gene	TF_Name	Z-Score	Start	End
pycom09g19430	Myb_box4_MYB	2.509	-994	-988
pycom09g19430	Myb_box5_MYB	1.7225	-70	-65
pycom09g19430	Myb_box5_MYB	1.7225	-186	-181
pycom09g19430	Myb_box5_MYB	1.7225	-19	-14
pycom09g19430	AuxRE_ARF	2.416	-137	-132
Gene	TF_Name	Z-Score	Start	End
pycom10g01520	Myb_box4_MYB	2.5741	-357	-351
pycom10g01520	Myb_box5_MYB	2.009	-76	-71
pycom10g01520	Myb_box5_MYB	2.009	-107	-102
pycom10g01520	Myb_box5_MYB	2.009	-137	-132
pycom10g01520	Myb_box5_MYB	2.009	-366	-361
pycom10g01520	Myb_box5_MYB	2.009	-718	-713
pycom10g01520	Myb_box5_MYB	2.009	-105	-100
Gene	TF_Name	Z-Score	Start	End
pycom10g04980	DREB_AP2_EREBP	2.2704	-44	-39
pycom10g04980	Myb_box3_MYB	1.8077	-536	-531
pycom10g04980	Myb_box1_MYB	1.798	-964	-959
pycom10g04980	W_box_WRKY	1.8576	-168	-163
pycom10g04980	W_box_WRKY	1.8576	-21	-16
pycom10g04980	Myb_box2_MYB	2.3236	-53	-48
pycom10g04980	Myb_box2_MYB	2.3236	-404	-399
pycom10g04980	Myb_box5_MYB	2.3909	-54	-49
pycom10g04980	Myb_box5_MYB	2.3909	-52	-47
Gene	TF_Name	Z-Score	Start	End
pycom10g05230	Myb_box4_MYB	2.8787	-594	-588
pycom10g05230	Myb_box2_MYB	2.9903	-741	-736
pycom10g05230	Myb_box1_MYB	1.7332	-815	-810
pycom10g05230	Myb_box1_MYB	1.7332	-960	-955
pycom10g05230	Myb_box1_MYB	1.7332	-24	-19
pycom10g05230	Myb_box5_MYB	2.3418	-882	-877
pycom10g05230	Myb_box3_MYB	2.4639	-815	-810
pycom10g05230	Myb_box3_MYB	2.4639	-960	-955
pycom10g05230	Myb_box3_MYB	2.4639	-24	-19
Gene	TF_Name	Z-Score	Start	End
pycom10g05610	DREB_AP2_EREBP	2.1071	-258	-253
pycom10g05610	Nac_box_NAC	2.2329	-815	-810
pycom10g05610	N_box_bHLH	2.693	-493	-488
pycom10g05610	G_box2_bZIP	2.2681	-836	-831
pycom10g05610	G_box_bHLH	2.684	-599	-594
pycom10g05610	G_box_bHLH	2.684	-944	-939
pycom10g05610	G_box_bHLH	2.684	-459	-454
pycom10g05610	GCC_box_AP2_EREBP	3.373	-435	-430
pycom10g05610	GCC_box_AP2_EREBP	3.373	-497	-492
pycom10g05610	Myb_box5_MYB	2.2191	-400	-395
pycom10g05610	Myb_box5_MYB	2.2191	-555	-550
Gene	TF_Name	Z-Score	Start	End
pycom10g11910	W_box_WRKY	1.5077	-584	-579
pycom10g11910	W_box_WRKY	1.5077	-307	-302
pycom10g11910	Myb_box2_MYB	2.9726	-574	-569
Gene	TF_Name	Z-Score	Start	End
pycom10g16500	W_box_WRKY	2.0395	-228	-223
pycom10g16500	Myb_box5_MYB	2.0042	-362	-357
pycom10g16500	N_box_bHLH	2.6638	-366	-361
Gene	TF_Name	Z-Score	Start	End
pycom10g19350	Myb_box5_MYB	1.6201	-216	-211
pycom10g19350	Myb_box5_MYB	1.6201	-997	-992
pycom10g19350	Myb_box5_MYB	1.6201	-214	-209
pycom10g19350	DREB_AP2_EREBP	2.3017	-858	-853
pycom10g19350	C_ABRE_bZIP	3.399	-102	-97
pycom10g19350	W_box_WRKY	1.7677	-765	-760
pycom10g19350	W_box_WRKY	1.7677	-662	-657
Gene	TF_Name	Z-Score	Start	End
pycom10g26950	Myb_box3_MYB	2.0145	-212	-207
pycom10g26950	Myb_box3_MYB	2.0145	-152	-147
pycom10g26950	Myb_box3_MYB	2.0145	-776	-771
pycom10g26950	Myb_box1_MYB	2.0126	-510	-505
pycom10g26950	Myb_box1_MYB	2.0126	-627	-622
pycom10g26950	Myb_box5_MYB	1.9481	-510	-505
pycom10g26950	Myb_box5_MYB	1.9481	-924	-919
pycom10g26950	Myb_box5_MYB	1.9481	-600	-595
pycom10g26950	Myb_box5_MYB	1.9481	-627	-622
pycom10g26950	C_ABRE_bZIP	3.8477	-400	-395
pycom10g26950	C_ABRE_bZIP	3.8477	-393	-388
pycom10g26950	Nac_box_NAC	2.6589	-457	-452
pycom10g26950	W_box_WRKY	2.1946	-706	-701
pycom10g26950	DREB_AP2_EREBP	2.6839	-602	-597
Gene	TF_Name	Z-Score	Start	End
pycom10g27490	G_box2_bZIP	2.7933	-259	-254
pycom10g27490	G_box2_bZIP	2.7933	-271	-266
Gene	TF_Name	Z-Score	Start	End
pycom11g04220	N_box_bHLH	2.1836	-790	-785
pycom11g04220	Myb_box1_MYB	2.3891	-68	-63
pycom11g04220	Myb_box1_MYB	2.3891	-290	-285
pycom11g04220	Myb_box1_MYB	2.3891	-691	-686
pycom11g04220	Myb_box2_MYB	2.2217	-599	-594
pycom11g04220	Myb_box2_MYB	2.2217	-748	-743
pycom11g04220	GCC_box_AP2_EREBP	3.7312	-454	-449
pycom11g04220	GCC_box_AP2_EREBP	3.7312	-452	-447
pycom11g04220	AuxRE_ARF	2.2495	-902	-897
pycom11g04220	Myb_box5_MYB	2.3321	-68	-63
pycom11g04220	Myb_box5_MYB	2.3321	-691	-686
pycom11g04220	Myb_box5_MYB	2.3321	-566	-561
pycom11g04220	Myb_box5_MYB	2.3321	-290	-285
Gene	TF_Name	Z-Score	Start	End
pycom11g13270	G_box_bHLH	3.4166	-194	-189
pycom11g13270	Myb_box5_MYB	2.9199	-591	-586
pycom11g13270	AuxRE_ARF	2.7399	-18	-13
pycom11g13270	Myb_box2_MYB	2.8651	-919	-914
Gene	TF_Name	Z-Score	Start	End
pycom11g21600	W_box_WRKY	2.185	-729	-724
pycom11g21600	Myb_box5_MYB	2.0624	-502	-497
pycom11g21600	Myb_box5_MYB	2.0624	-518	-513
pycom11g21600	Myb_box1_MYB	2.1782	-502	-497
pycom11g21600	GCC_box_AP2_EREBP	4.0568	-208	-203
pycom11g21600	Myb_box3_MYB	2.141	-357	-352
Gene	TF_Name	Z-Score	Start	End
pycom11g21770	G_box_bHLH	3.3578	-83	-78
pycom11g21770	HSE1_HSF	1.6202	-653	-646
pycom11g21770	N_box_bHLH	2.7373	-567	-562
pycom11g21770	W_box_WRKY	2.2491	-260	-255
pycom11g21770	W_box_WRKY	2.2491	-607	-602
pycom11g21770	W_box_WRKY	2.2491	-534	-529
pycom11g21770	Myb_box5_MYB	2.0741	-829	-824
pycom11g21770	Myb_box5_MYB	2.0741	-158	-153
pycom11g21770	Myb_box1_MYB	2.1981	-158	-153
Gene	TF_Name	Z-Score	Start	End
pycom11g22430	G_box_bHLH	3.1066	-156	-151
pycom11g22430	G_box2_bZIP	1.9363	-589	-584
pycom11g22430	Myb_box3_MYB	1.9544	-822	-817
pycom11g22430	Myb_box2_MYB	2.484	-56	-51
pycom11g22430	Myb_box2_MYB	2.484	-52	-47
pycom11g22430	Myb_box5_MYB	1.8131	-53	-48
pycom11g22430	Myb_box5_MYB	1.8131	-201	-196
pycom11g22430	Myb_box5_MYB	1.8131	-746	-741
pycom11g22430	Myb_box5_MYB	1.8131	-55	-50
Gene	TF_Name	Z-Score	Start	End
pycom11g25970	G_box2_bZIP	1.954	-547	-542
pycom11g25970	G_box2_bZIP	1.954	-524	-519
pycom11g25970	Myb_box5_MYB	1.855	-348	-343
pycom11g25970	Myb_box5_MYB	1.855	-260	-255
pycom11g25970	Myb_box5_MYB	1.855	-343	-338
pycom11g25970	Myb_box5_MYB	1.855	-585	-580
pycom11g25970	Myb_box2_MYB	1.678	-514	-509
pycom11g25970	GCC_box_AP2_EREBP	2.9649	-59	-54
pycom11g25970	GCC_box_AP2_EREBP	2.9649	-528	-523
pycom11g25970	GCC_box_AP2_EREBP	2.9649	-60	-55
pycom11g25970	GCC_box_AP2_EREBP	2.9649	-270	-265
pycom11g25970	GCC_box_AP2_EREBP	2.9649	-57	-52
pycom11g25970	Myb_box1_MYB	1.9789	-260	-255
Gene	TF_Name	Z-Score	Start	End
pycom11g26320	Myb_box2_MYB	2.9372	-695	-690
pycom11g26320	Myb_box5_MYB	2.9187	-293	-288
pycom11g26320	W_box_WRKY	1.6669	-829	-824
pycom11g26320	Myb_box1_MYB	3.0608	-293	-288
pycom11g26320	N_box_bHLH	3.5131	-320	-315
pycom11g26320	DREB_AP2_EREBP	2.8324	-175	-170
Gene	TF_Name	Z-Score	Start	End
pycom12g11460	Myb_box1_MYB	1.5538	-321	-316
pycom12g11460	Myb_box2_MYB	2.9274	-294	-289
pycom12g11460	W_box_WRKY	2.3778	-192	-187
pycom12g11460	W_box_WRKY	2.3778	-155	-150
pycom12g11460	W_box_WRKY	2.3778	-200	-195
pycom12g11460	Nac_box_NAC	2.9786	-728	-723
pycom12g11460	G_box2_bZIP	3.0586	-16	-11
pycom12g11460	G_box_bHLH	3.5145	-746	-741
pycom12g11460	G_box_bHLH	3.5145	-343	-338
pycom12g11460	Myb_box5_MYB	2.1589	-487	-482
pycom12g11460	Myb_box5_MYB	2.1589	-962	-957
pycom12g11460	Myb_box5_MYB	2.1589	-112	-107
pycom12g11460	Myb_box3_MYB	2.2824	-321	-316
Gene	TF_Name	Z-Score	Start	End
pycom12g11840	G_box_bHLH	3.4521	-789	-784
pycom12g11840	W_box_WRKY	1.5047	-775	-770
pycom12g11840	W_box_WRKY	1.5047	-518	-513
pycom12g11840	Nac_box_NAC	2.8187	-792	-787
pycom12g11840	Myb_box1_MYB	2.2117	-176	-171
pycom12g11840	Myb_box5_MYB	2.1177	-766	-761
pycom12g11840	Myb_box5_MYB	2.1177	-176	-171
pycom12g11840	Myb_box5_MYB	2.1177	-486	-481
pycom12g11840	Myb_box5_MYB	2.1177	-878	-873
pycom12g11840	Myb_box5_MYB	2.1177	-442	-437
Gene	TF_Name	Z-Score	Start	End
pycom12g12070	Myb_box5_MYB	2.0584	-293	-288
pycom12g12070	Myb_box5_MYB	2.0584	-516	-511
pycom12g12070	Myb_box5_MYB	2.0584	-573	-568
pycom12g12070	Myb_box5_MYB	2.0584	-575	-570
pycom12g12070	W_box_WRKY	1.5188	-632	-627
pycom12g12070	G_ABRE_bZIP	3.631	-276	-269
pycom12g12070	G_box_bHLH	3.3582	-276	-271
pycom12g12070	AuxRE_ARF	2.6903	-985	-980
pycom12g12070	AuxRE_ARF	2.6903	-119	-114
pycom12g12070	Myb_box4_MYB	2.6176	-105	-99
Gene	TF_Name	Z-Score	Start	End
pycom12g12530	Myb_box1_MYB	2.25	-450	-445
pycom12g12530	Myb_box5_MYB	3.0536	-188	-183
pycom12g12530	Myb_box5_MYB	3.0536	-805	-800
pycom12g12530	AuxRE_ARF	2.8166	-377	-372
pycom12g12530	Nac_box_NAC	2.8389	-515	-510
Gene	TF_Name	Z-Score	Start	End
pycom12g12540	Nac_box_NAC	2.6735	-866	-861
pycom12g12540	Myb_box5_MYB	1.9111	-59	-54
pycom12g12540	Myb_box5_MYB	1.9111	-937	-932
pycom12g12540	Myb_box3_MYB	2.0335	-655	-650
Gene	TF_Name	Z-Score	Start	End
pycom12g12650	G_box2_bZIP	1.9408	-945	-940
pycom12g12650	Myb_box5_MYB	1.8237	-806	-801
pycom12g12650	Myb_box5_MYB	1.8237	-674	-669
pycom12g12650	Myb_box1_MYB	1.9531	-674	-669
pycom12g12650	DREB_AP2_EREBP	3.1284	-663	-658
Gene	TF_Name	Z-Score	Start	End
pycom12g14480	Myb_box5_MYB	2.3391	-947	-942
pycom12g14480	Myb_box5_MYB	2.3391	-973	-968
pycom12g14480	Myb_box2_MYB	2.2711	-946	-941
pycom12g14480	Myb_box2_MYB	2.2711	-972	-967
pycom12g14480	Myb_box3_MYB	1.7799	-622	-617
pycom12g14480	Myb_box3_MYB	1.7799	-926	-921
pycom12g14480	C_ABRE_bZIP	3.3068	-543	-538
pycom12g14480	C_ABRE_bZIP	3.3068	-546	-541
Gene	TF_Name	Z-Score	Start	End
pycom12g15860	G_box1_bZIP	3.2089	-376	-369
pycom12g15860	Myb_box3_MYB	1.6184	-525	-520
pycom12g15860	Myb_box5_MYB	2.1469	-213	-208
pycom12g15860	Myb_box5_MYB	2.1469	-274	-269
pycom12g15860	Myb_box5_MYB	2.1469	-339	-334
pycom12g15860	G_box_bHLH	2.6704	-375	-370
pycom12g15860	Myb_box1_MYB	2.2716	-213	-208
pycom12g15860	G_box2_bZIP	2.2443	-800	-795
pycom12g15860	N_box_bHLH	2.6243	-900	-895
pycom12g15860	N_box_bHLH	2.6243	-358	-353
pycom12g15860	Myb_box4_MYB	1.9012	-93	-87
pycom12g15860	C_ABRE_bZIP	3.1704	-153	-148
pycom12g15860	G_ABRE_bZIP	2.8665	-375	-368
pycom12g15860	Myb_box2_MYB	1.9909	-188	-183
pycom12g15860	Myb_box2_MYB	1.9909	-123	-118
pycom12g15860	Myb_box2_MYB	1.9909	-284	-279
pycom12g15860	DREB_AP2_EREBP	2.6474	-855	-850
Gene	TF_Name	Z-Score	Start	End
pycom12g16200	Myb_box2_MYB	2.6685	-693	-688
pycom12g16200	DREB_AP2_EREBP	2.5547	-696	-691
pycom12g16200	Myb_box1_MYB	2.6752	-528	-523
pycom12g16200	Myb_box5_MYB	2.6517	-694	-689
pycom12g16200	Myb_box5_MYB	2.6517	-528	-523
pycom12g16200	N_box_bHLH	2.5284	-194	-189
Gene	TF_Name	Z-Score	Start	End
pycom12g17060	Myb_box1_MYB	2.6239	-716	-711
pycom12g17060	Myb_box1_MYB	2.6239	-806	-801
pycom12g17060	AuxRE_ARF	2.5269	-753	-748
pycom12g17060	Myb_box4_MYB	2.3699	-544	-538
pycom12g17060	Myb_box5_MYB	2.5282	-806	-801
pycom12g17060	Myb_box5_MYB	2.5282	-716	-711
pycom12g17060	G_box2_bZIP	2.6302	-218	-213
pycom12g17060	GCC_box_AP2_EREBP	3.9577	-248	-243
pycom12g17060	GCC_box_AP2_EREBP	3.9577	-633	-628
pycom12g17060	W_box_WRKY	1.9881	-193	-188
Gene	TF_Name	Z-Score	Start	End
pycom12g17570	W_box_WRKY	2.1914	-169	-164
pycom12g17570	AuxRE_ARF	2.754	-56	-51
pycom12g17570	C_ABRE_bZIP	3.8938	-717	-712
pycom12g17570	Myb_box3_MYB	2.1357	-215	-210
pycom12g17570	G_box2_bZIP	2.1105	-318	-313
Gene	TF_Name	Z-Score	Start	End
pycom13g05300	AuxRE_ARF	2.52	-459	-454
pycom13g05300	DREB_AP2_EREBP	2.8455	-302	-297
pycom13g05300	DREB_AP2_EREBP	2.8455	-744	-739
Gene	TF_Name	Z-Score	Start	End
pycom13g05450	DREB_AP2_EREBP	2.3438	-170	-165
pycom13g05450	Myb_box2_MYB	2.6145	-387	-382
pycom13g05450	Myb_box2_MYB	2.6145	-248	-243
pycom13g05450	Myb_box2_MYB	2.6145	-930	-925
pycom13g05450	AuxRE_ARF	2.316	-629	-624
pycom13g05450	AuxRE_ARF	2.316	-706	-701
pycom13g05450	Myb_box5_MYB	2.5035	-388	-383
Gene	TF_Name	Z-Score	Start	End
pycom13g06590	N_box_bHLH	2.5017	-211	-206
Gene	TF_Name	Z-Score	Start	End
pycom13g06850	Myb_box1_MYB	2.1786	-624	-619
pycom13g06850	Myb_box4_MYB	2.0119	-787	-781
pycom13g06850	Myb_box2_MYB	2.0979	-791	-786
pycom13g06850	Myb_box2_MYB	2.0979	-770	-765
pycom13g06850	G_box2_bZIP	2.1144	-813	-808
pycom13g06850	Myb_box5_MYB	2.1191	-624	-619
Gene	TF_Name	Z-Score	Start	End
pycom13g07860	Myb_box2_MYB	2.5944	-59	-54
pycom13g07860	Myb_box2_MYB	2.5944	-751	-746
pycom13g07860	Myb_box2_MYB	2.5944	-35	-30
pycom13g07860	Myb_box1_MYB	1.7161	-464	-459
pycom13g07860	Myb_box1_MYB	1.7161	-432	-427
pycom13g07860	Myb_box5_MYB	1.6737	-34	-29
pycom13g07860	Myb_box5_MYB	1.6737	-464	-459
pycom13g07860	Myb_box5_MYB	1.6737	-432	-427
pycom13g07860	Myb_box5_MYB	1.6737	-440	-435
pycom13g07860	Myb_box5_MYB	1.6737	-391	-386
pycom13g07860	Myb_box5_MYB	1.6737	-752	-747
pycom13g07860	Myb_box5_MYB	1.6737	-754	-749
Gene	TF_Name	Z-Score	Start	End
pycom13g09100	W_box_WRKY	2.1944	-652	-647
pycom13g09100	HSE1_HSF	1.5744	-557	-550
pycom13g09100	Myb_box5_MYB	2.0001	-58	-53
pycom13g09100	G_box_bHLH	3.231	-383	-378
pycom13g09100	G_box_bHLH	3.231	-260	-255
pycom13g09100	G_box_bHLH	3.231	-149	-144
pycom13g09100	Nac_box_NAC	2.7137	-305	-300
pycom13g09100	Nac_box_NAC	2.7137	-143	-138
pycom13g09100	DREB_AP2_EREBP	3.3338	-839	-834
Gene	TF_Name	Z-Score	Start	End
pycom13g10020	Myb_box1_MYB	2.8554	-760	-755
pycom13g10020	GCC_box_AP2_EREBP	4.2355	-481	-476
pycom13g10020	GCC_box_AP2_EREBP	4.2355	-484	-479
pycom13g10020	GCC_box_AP2_EREBP	4.2355	-485	-480
pycom13g10020	GCC_box_AP2_EREBP	4.2355	-482	-477
pycom13g10020	Myb_box2_MYB	2.782	-989	-984
pycom13g10020	Myb_box5_MYB	2.8188	-760	-755
Gene	TF_Name	Z-Score	Start	End
pycom13g10120	W_box_WRKY	2.1585	-599	-594
pycom13g10120	Nac_box_NAC	2.5277	-405	-400
pycom13g10120	N_box_bHLH	2.5901	-115	-110
Gene	TF_Name	Z-Score	Start	End
pycom13g10320	HSE1_HSF	1.8411	-435	-428
pycom13g10320	G_box2_bZIP	3.1149	-964	-959
pycom13g10320	G_box_bHLH	3.6188	-338	-333
pycom13g10320	Myb_box2_MYB	3.0416	-888	-883
pycom13g10320	Myb_box5_MYB	2.2514	-246	-241
pycom13g10320	Myb_box5_MYB	2.2514	-889	-884
pycom13g10320	Myb_box5_MYB	2.2514	-887	-882
pycom13g10320	Myb_box5_MYB	2.2514	-241	-236
pycom13g10320	N_box_bHLH	3.0186	-686	-681
Gene	TF_Name	Z-Score	Start	End
pycom13g10470	DREB_AP2_EREBP	3.4063	-874	-869
Gene	TF_Name	Z-Score	Start	End
pycom13g10490	Myb_box1_MYB	1.5789	-928	-923
pycom13g10490	Nac_box_NAC	2.1668	-914	-909
pycom13g10490	DREB_AP2_EREBP	2.7515	-399	-394
pycom13g10490	DREB_AP2_EREBP	2.7515	-599	-594
pycom13g10490	DREB_AP2_EREBP	2.7515	-412	-407
pycom13g10490	G_box2_bZIP	1.5665	-129	-124
pycom13g10490	N_box_bHLH	2.7458	-841	-836
pycom13g10490	Myb_box3_MYB	1.6015	-193	-188
Gene	TF_Name	Z-Score	Start	End
pycom13g10860	Myb_box5_MYB	1.5927	-739	-734
pycom13g10860	Myb_box5_MYB	1.5927	-785	-780
pycom13g10860	Myb_box4_MYB	2.2583	-784	-778
pycom13g10860	Myb_box4_MYB	2.2583	-738	-732
pycom13g10860	AuxRE_ARF	2.2369	-401	-396
pycom13g10860	AuxRE_ARF	2.2369	-596	-591
Gene	TF_Name	Z-Score	Start	End
pycom13g11480	Nac_box_NAC	2.6969	-934	-929
pycom13g11480	Myb_box2_MYB	2.7419	-547	-542
pycom13g11480	Myb_box2_MYB	2.7419	-710	-705
pycom13g11480	Myb_box5_MYB	1.9431	-548	-543
pycom13g11480	Myb_box5_MYB	1.9431	-765	-760
pycom13g11480	Myb_box5_MYB	1.9431	-861	-856
pycom13g11480	Myb_box5_MYB	1.9431	-484	-479
pycom13g11480	Myb_box1_MYB	2.0648	-765	-760
pycom13g11480	Myb_box1_MYB	2.0648	-484	-479
pycom13g11480	AuxRE_ARF	2.6649	-894	-889
pycom13g11480	AuxRE_ARF	2.6649	-675	-670
pycom13g11480	AuxRE_ARF	2.6649	-897	-892
pycom13g11480	DREB_AP2_EREBP	2.6357	-916	-911
Gene	TF_Name	Z-Score	Start	End
pycom13g12950	G_box_bHLH	2.7622	-720	-715
pycom13g12950	G_box_bHLH	2.7622	-325	-320
pycom13g12950	G_box_bHLH	2.7622	-512	-507
pycom13g12950	Nac_box_NAC	2.3093	-509	-504
pycom13g12950	DREB_AP2_EREBP	2.2006	-330	-325
pycom13g12950	N_box_bHLH	2.2046	-552	-547
Gene	TF_Name	Z-Score	Start	End
pycom13g17350	DREB_AP2_EREBP	2.4488	-348	-343
pycom13g17350	Myb_box3_MYB	1.912	-887	-882
pycom13g17350	Myb_box3_MYB	1.912	-931	-926
pycom13g17350	G_box_bHLH	3.0419	-675	-670
pycom13g17350	Myb_box2_MYB	2.4918	-729	-724
pycom13g17350	G_box2_bZIP	1.914	-182	-177
pycom13g17350	Nac_box_NAC	2.5116	-211	-206
pycom13g17350	Myb_box5_MYB	1.7865	-730	-725
pycom13g17350	Myb_box5_MYB	1.7865	-118	-113
Gene	TF_Name	Z-Score	Start	End
pycom13g17580	N_box_bHLH	2.0417	-790	-785
pycom13g17580	DREB_AP2_EREBP	2.0404	-858	-853
pycom13g17580	Myb_box5_MYB	2.1537	-431	-426
pycom13g17580	G_ABRE_bZIP	2.4129	-631	-624
pycom13g17580	G_box2_bZIP	1.5989	-889	-884
pycom13g17580	Myb_box1_MYB	2.2732	-431	-426
pycom13g17580	Myb_box2_MYB	2.0848	-576	-571
Gene	TF_Name	Z-Score	Start	End
pycom13g17710	Myb_box5_MYB	2.7777	-381	-376
pycom13g17710	W_box_WRKY	2.0835	-22	-17
pycom13g17710	Myb_box4_MYB	2.6448	-392	-386
pycom13g17710	G_box_bHLH	3.2597	-177	-172
pycom13g17710	AuxRE_ARF	2.6469	-296	-291
pycom13g17710	Myb_box2_MYB	2.7379	-140	-135
pycom13g17710	G_box2_bZIP	2.066	-928	-923
pycom13g17710	Myb_box1_MYB	2.8207	-381	-376
Gene	TF_Name	Z-Score	Start	End
pycom14g04620	Myb_box4_MYB	3.0673	-925	-919
pycom14g04620	Myb_box5_MYB	2.2756	-630	-625
pycom14g04620	Myb_box5_MYB	2.2756	-914	-909
pycom14g04620	Myb_box5_MYB	2.2756	-872	-867
pycom14g04620	Myb_box5_MYB	2.2756	-377	-372
pycom14g04620	HSE1_HSF	1.8001	-982	-975
Gene	TF_Name	Z-Score	Start	End
pycom14g04900	Myb_box3_MYB	1.8297	-610	-605
pycom14g04900	Myb_box5_MYB	1.7375	-378	-373
pycom14g04900	G_box2_bZIP	1.8008	-23	-18
pycom14g04900	N_box_bHLH	2.3477	-305	-300
Gene	TF_Name	Z-Score	Start	End
pycom14g09130	AuxRE_ARF	2.7618	-103	-98
pycom14g09130	Myb_box5_MYB	2.105	-324	-319
pycom14g09130	Myb_box5_MYB	2.105	-33	-28
pycom14g09130	G_box2_bZIP	2.861	-346	-341
Gene	TF_Name	Z-Score	Start	End
pycom14g09410	G_box_bHLH	3.4023	-329	-324
pycom14g09410	Myb_box3_MYB	2.1163	-497	-492
pycom14g09410	Myb_box5_MYB	2.0285	-898	-893
pycom14g09410	Myb_box5_MYB	2.0285	-877	-872
pycom14g09410	Myb_box5_MYB	2.0285	-896	-891
Gene	TF_Name	Z-Score	Start	End
pycom14g09870	W_box_WRKY	2.1067	-630	-625
pycom14g09870	N_box_bHLH	2.6083	-561	-556
pycom14g09870	Myb_box5_MYB	2.6987	-812	-807
pycom14g09870	Myb_box5_MYB	2.6987	-673	-668
pycom14g09870	Myb_box1_MYB	2.8211	-812	-807
pycom14g09870	Myb_box1_MYB	2.8211	-673	-668
pycom14g09870	Myb_box2_MYB	2.6389	-399	-394
pycom14g09870	Myb_box4_MYB	2.5508	-360	-354
Gene	TF_Name	Z-Score	Start	End
pycom14g18920	Myb_box5_MYB	2.5759	-388	-383
pycom14g18920	Myb_box5_MYB	2.5759	-41	-36
pycom14g18920	Myb_box5_MYB	2.5759	-43	-38
pycom14g18920	W_box_WRKY	2.0782	-539	-534
pycom14g18920	W_box_WRKY	2.0782	-543	-538
pycom14g18920	W_box_WRKY	2.0782	-490	-485
pycom14g18920	W_box_WRKY	2.0782	-922	-917
pycom14g18920	Myb_box2_MYB	2.6274	-42	-37
pycom14g18920	GCC_box_AP2_EREBP	3.9015	-48	-43
pycom14g18920	GCC_box_AP2_EREBP	3.9015	-46	-41
pycom14g18920	GCC_box_AP2_EREBP	3.9015	-20	-15
pycom14g18920	Myb_box1_MYB	2.6524	-388	-383
pycom14g18920	G_box_bHLH	3.0772	-888	-883
Gene	TF_Name	Z-Score	Start	End
pycom15g00830	N_box_bHLH	2.7642	-22	-17
pycom15g00830	Myb_box5_MYB	2.0961	-258	-253
pycom15g00830	W_box_WRKY	2.3472	-491	-486
pycom15g00830	W_box_WRKY	2.3472	-595	-590
pycom15g00830	Myb_box3_MYB	2.1929	-367	-362
pycom15g00830	Nac_box_NAC	2.7329	-180	-175
Gene	TF_Name	Z-Score	Start	End
pycom15g01580	G_box2_bZIP	2.0241	-780	-775
pycom15g01580	AuxRE_ARF	2.5676	-102	-97
pycom15g01580	Myb_box2_MYB	2.4983	-301	-296
pycom15g01580	Myb_box2_MYB	2.4983	-534	-529
pycom15g01580	Myb_box5_MYB	1.8514	-311	-306
pycom15g01580	Myb_box5_MYB	1.8514	-313	-308
pycom15g01580	Myb_box4_MYB	2.4022	-552	-546
pycom15g01580	Myb_box4_MYB	2.4022	-558	-552
pycom15g01580	Myb_box4_MYB	2.4022	-546	-540
pycom15g01580	Myb_box4_MYB	2.4022	-540	-534
pycom15g01580	Myb_box3_MYB	2.0078	-358	-353
pycom15g01580	Myb_box3_MYB	2.0078	-664	-659
Gene	TF_Name	Z-Score	Start	End
pycom15g01670	Myb_box5_MYB	3.0372	-108	-103
pycom15g01670	DREB_AP2_EREBP	2.9423	-214	-209
pycom15g01670	W_box_WRKY	2.2945	-194	-189
Gene	TF_Name	Z-Score	Start	End
pycom15g04890	Myb_box1_MYB	2.0802	-149	-144
pycom15g04890	DREB_AP2_EREBP	2.7438	-153	-148
pycom15g04890	DREB_AP2_EREBP	2.7438	-294	-289
pycom15g04890	Myb_box5_MYB	2.8726	-151	-146
pycom15g04890	N_box_bHLH	3.4548	-394	-389
Gene	TF_Name	Z-Score	Start	End
pycom15g05410	Myb_box2_MYB	2.5093	-429	-424
pycom15g05410	DREB_AP2_EREBP	2.3791	-739	-734
pycom15g05410	DREB_AP2_EREBP	2.3791	-714	-709
pycom15g05410	N_box_bHLH	2.3756	-216	-211
pycom15g05410	Myb_box5_MYB	1.7347	-142	-137
pycom15g05410	Myb_box5_MYB	1.7347	-398	-393
pycom15g05410	Myb_box5_MYB	1.7347	-167	-162
pycom15g05410	Myb_box5_MYB	1.7347	-130	-125
pycom15g05410	GCC_box_AP2_EREBP	3.8107	-322	-317
pycom15g05410	GCC_box_AP2_EREBP	3.8107	-323	-318
Gene	TF_Name	Z-Score	Start	End
pycom15g05520	Myb_box5_MYB	2.8063	-118	-113
pycom15g05520	Myb_box1_MYB	2.9078	-118	-113
Gene	TF_Name	Z-Score	Start	End
pycom15g05670	Myb_box5_MYB	2.8788	-430	-425
pycom15g05670	Myb_box5_MYB	2.8788	-358	-353
pycom15g05670	Myb_box5_MYB	2.8788	-381	-376
pycom15g05670	C_ABRE_bZIP	3.7716	-140	-135
pycom15g05670	Myb_box1_MYB	2.8762	-358	-353
pycom15g05670	Myb_box1_MYB	2.8762	-381	-376
Gene	TF_Name	Z-Score	Start	End
pycom15g06910	Myb_box5_MYB	1.8333	-226	-221
pycom15g06910	Myb_box5_MYB	1.8333	-411	-406
pycom15g06910	Myb_box5_MYB	1.8333	-977	-972
pycom15g06910	Myb_box2_MYB	2.4498	-7	-2
pycom15g06910	AuxRE_ARF	2.4558	-421	-416
pycom15g06910	Nac_box_NAC	2.5775	-922	-917
pycom15g06910	W_box_WRKY	2.0044	-259	-254
pycom15g06910	W_box_WRKY	2.0044	-859	-854
pycom15g06910	W_box_WRKY	2.0044	-253	-248
pycom15g06910	GCC_box_AP2_EREBP	3.7457	-217	-212
pycom15g06910	GCC_box_AP2_EREBP	3.7457	-229	-224
pycom15g06910	GCC_box_AP2_EREBP	3.7457	-434	-429
pycom15g06910	GCC_box_AP2_EREBP	3.7457	-219	-214
pycom15g06910	DREB_AP2_EREBP	2.4451	-99	-94
Gene	TF_Name	Z-Score	Start	End
pycom15g06960	Myb_box5_MYB	2.7335	-677	-672
pycom15g06960	Myb_box1_MYB	2.0566	-848	-843
Gene	TF_Name	Z-Score	Start	End
pycom15g06980	Myb_box1_MYB	2.6585	-315	-310
pycom15g06980	G_box2_bZIP	2.7036	-626	-621
pycom15g06980	Myb_box5_MYB	2.4858	-749	-744
pycom15g06980	Myb_box5_MYB	2.4858	-313	-308
pycom15g06980	Myb_box5_MYB	2.4858	-315	-310
pycom15g06980	Myb_box5_MYB	2.4858	-747	-742
pycom15g06980	W_box_WRKY	1.9605	-81	-76
pycom15g06980	W_box_WRKY	1.9605	-93	-88
Gene	TF_Name	Z-Score	Start	End
pycom15g07050	W_box_WRKY	2.054	-547	-542
pycom15g07050	Myb_box5_MYB	2.7108	-699	-694
pycom15g07050	AuxRE_ARF	2.4995	-251	-246
pycom15g07050	N_box_bHLH	3.2425	-668	-663
pycom15g07050	GCC_box_AP2_EREBP	4.0945	-749	-744
Gene	TF_Name	Z-Score	Start	End
pycom15g07110	DREB_AP2_EREBP	2.5572	-32	-27
pycom15g07110	Myb_box2_MYB	2.5257	-748	-743
pycom15g07110	Myb_box1_MYB	2.0137	-275	-270
pycom15g07110	Myb_box1_MYB	2.0137	-332	-327
pycom15g07110	Myb_box4_MYB	2.4958	-29	-23
pycom15g07110	Myb_box5_MYB	1.9002	-249	-244
pycom15g07110	Myb_box5_MYB	1.9002	-30	-25
pycom15g07110	Myb_box5_MYB	1.9002	-749	-744
pycom15g07110	Myb_box5_MYB	1.9002	-332	-327
pycom15g07110	Myb_box5_MYB	1.9002	-275	-270
pycom15g07110	Myb_box5_MYB	1.9002	-747	-742
pycom15g07110	W_box_WRKY	2.0078	-403	-398
pycom15g07110	W_box_WRKY	2.0078	-647	-642
pycom15g07110	AuxRE_ARF	2.461	-716	-711
Gene	TF_Name	Z-Score	Start	End
pycom15g07310	Nac_box_NAC	3.3835	-309	-304
pycom15g07310	Myb_box4_MYB	2.9124	-41	-35
pycom15g07310	Myb_box2_MYB	3.0505	-48	-43
pycom15g07310	Myb_box5_MYB	2.4085	-609	-604
Gene	TF_Name	Z-Score	Start	End
pycom15g07450	Myb_box5_MYB	2.1186	-980	-975
pycom15g07450	Myb_box5_MYB	2.1186	-827	-822
pycom15g07450	W_box_WRKY	1.515	-412	-407
pycom15g07450	Nac_box_NAC	2.8547	-792	-787
pycom15g07450	G_box_bHLH	3.4018	-629	-624
pycom15g07450	G_box_bHLH	3.4018	-669	-664
pycom15g07450	G_box_bHLH	3.4018	-632	-627
Gene	TF_Name	Z-Score	Start	End
pycom15g07740	Myb_box4_MYB	2.9582	-998	-992
pycom15g07740	AuxRE_ARF	2.9158	-192	-187
pycom15g07740	Nac_box_NAC	2.9307	-260	-255
pycom15g07740	Myb_box1_MYB	3.0717	-234	-229
pycom15g07740	Myb_box5_MYB	3.0559	-234	-229
pycom15g07740	W_box_WRKY	1.5158	-623	-618
Gene	TF_Name	Z-Score	Start	End
pycom15g10480	Myb_box1_MYB	1.8465	-948	-943
pycom15g10480	Myb_box3_MYB	2.6021	-948	-943
pycom15g10480	Myb_box2_MYB	3.3068	-676	-671
pycom15g10480	W_box_WRKY	2.7127	-50	-45
pycom15g10480	Myb_box5_MYB	2.512	-75	-70
pycom15g10480	Myb_box5_MYB	2.512	-550	-545
pycom15g10480	Myb_box5_MYB	2.512	-73	-68
pycom15g10480	AuxRE_ARF	3.3262	-112	-107
pycom15g10480	G_box_bHLH	3.9903	-450	-445
pycom15g10480	G_box_bHLH	3.9903	-447	-442
pycom15g10480	G_box_bHLH	3.9903	-494	-489
pycom15g10480	Myb_box4_MYB	3.2591	-514	-508
Gene	TF_Name	Z-Score	Start	End
pycom15g11680	N_box_bHLH	2.8485	-122	-117
pycom15g11680	Myb_box4_MYB	2.0985	-207	-201
pycom15g11680	G_ABRE_bZIP	2.5495	-328	-321
pycom15g11680	Myb_box3_MYB	1.7877	-514	-509
pycom15g11680	DREB_AP2_EREBP	2.8165	-244	-239
pycom15g11680	Myb_box1_MYB	1.782	-399	-394
pycom15g11680	Myb_box1_MYB	1.782	-544	-539
pycom15g11680	Myb_box5_MYB	1.6246	-399	-394
pycom15g11680	Myb_box5_MYB	1.6246	-861	-856
pycom15g11680	Myb_box5_MYB	1.6246	-909	-904
pycom15g11680	Myb_box5_MYB	1.6246	-405	-400
pycom15g11680	Myb_box5_MYB	1.6246	-544	-539
pycom15g11680	Myb_box5_MYB	1.6246	-911	-906
pycom15g11680	Myb_box2_MYB	2.1733	-835	-830
pycom15g11680	Myb_box2_MYB	2.1733	-551	-546
pycom15g11680	Myb_box2_MYB	2.1733	-555	-550
Gene	TF_Name	Z-Score	Start	End
pycom15g15890	Myb_box2_MYB	2.8777	-12	-7
Gene	TF_Name	Z-Score	Start	End
pycom15g17340	Myb_box5_MYB	2.5999	-122	-117
pycom15g17340	Myb_box5_MYB	2.5999	-383	-378
pycom15g17340	Myb_box2_MYB	2.4286	-958	-953
pycom15g17340	Myb_box2_MYB	2.4286	-382	-377
pycom15g17340	Myb_box2_MYB	2.4286	-954	-949
pycom15g17340	Myb_box3_MYB	1.9823	-428	-423
Gene	TF_Name	Z-Score	Start	End
pycom15g17490	AuxRE_ARF	2.4833	-996	-991
pycom15g17490	Myb_box5_MYB	2.4823	-633	-628
pycom15g17490	Myb_box1_MYB	2.5185	-633	-628
pycom15g17490	G_box2_bZIP	1.7753	-913	-908
Gene	TF_Name	Z-Score	Start	End
pycom15g18840	Myb_box3_MYB	2.2389	-727	-722
pycom15g18840	Myb_box3_MYB	2.2389	-49	-44
Gene	TF_Name	Z-Score	Start	End
pycom15g19350	Myb_box5_MYB	2.9486	-879	-874
pycom15g19350	AuxRE_ARF	2.8638	-252	-247
pycom15g19350	Myb_box3_MYB	2.2276	-72	-67
pycom15g19350	Myb_box2_MYB	2.9164	-431	-426
pycom15g19350	Myb_box1_MYB	3.0053	-879	-874
Gene	TF_Name	Z-Score	Start	End
pycom15g19370	Myb_box4_MYB	2.8886	-981	-975
pycom15g19370	Myb_box5_MYB	2.1638	-567	-562
Gene	TF_Name	Z-Score	Start	End
pycom15g20950	DREB_AP2_EREBP	2.7502	-706	-701
pycom15g20950	W_box_WRKY	2.1171	-597	-592
pycom15g20950	W_box_WRKY	2.1171	-415	-410
pycom15g20950	Myb_box3_MYB	2.1294	-881	-876
pycom15g20950	Myb_box3_MYB	2.1294	-302	-297
pycom15g20950	Myb_box5_MYB	2.0145	-573	-568
pycom15g20950	AuxRE_ARF	2.6089	-90	-85
Gene	TF_Name	Z-Score	Start	End
pycom15g22920	Myb_box3_MYB	2.0659	-17	-12
pycom15g22920	Myb_box4_MYB	2.482	-947	-941
pycom15g22920	Myb_box2_MYB	2.5929	-783	-778
pycom15g22920	Myb_box5_MYB	2.6557	-856	-851
pycom15g22920	N_box_bHLH	2.5782	-818	-813
Gene	TF_Name	Z-Score	Start	End
pycom15g23300	Myb_box2_MYB	2.5133	-258	-253
pycom15g23300	Myb_box2_MYB	2.5133	-6	-1
pycom15g23300	Myb_box2_MYB	2.5133	-322	-317
pycom15g23300	DREB_AP2_EREBP	2.5197	-325	-320
pycom15g23300	Myb_box5_MYB	1.8898	-392	-387
pycom15g23300	Myb_box5_MYB	1.8898	-252	-247
pycom15g23300	Myb_box5_MYB	1.8898	-394	-389
pycom15g23300	Myb_box3_MYB	2.0196	-352	-347
pycom15g23300	Myb_box1_MYB	2.0254	-392	-387
Gene	TF_Name	Z-Score	Start	End
pycom15g24630	Myb_box1_MYB	1.645	-344	-339
pycom15g24630	Nac_box_NAC	2.2273	-775	-770
pycom15g24630	Myb_box5_MYB	2.2374	-527	-522
pycom15g24630	Myb_box3_MYB	1.6584	-627	-622
pycom15g24630	W_box_WRKY	1.7433	-667	-662
pycom15g24630	W_box_WRKY	1.7433	-610	-605
pycom15g24630	DREB_AP2_EREBP	2.1326	-363	-358
pycom15g24630	DREB_AP2_EREBP	2.1326	-215	-210
pycom15g24630	G_box2_bZIP	2.2736	-328	-323
pycom15g24630	G_box_bHLH	2.6814	-422	-417
pycom15g24630	G_box_bHLH	2.6814	-203	-198
pycom15g24630	G_box_bHLH	2.6814	-425	-420
pycom15g24630	G_box_bHLH	2.6814	-673	-668
pycom15g24630	N_box_bHLH	2.1405	-194	-189
Gene	TF_Name	Z-Score	Start	End
pycom15g25080	Myb_box2_MYB	3.1376	-202	-197
pycom15g25080	W_box_WRKY	1.6436	-526	-521
pycom15g25080	W_box_WRKY	1.6436	-470	-465
pycom15g25080	AuxRE_ARF	2.9569	-51	-46
pycom15g25080	Myb_box5_MYB	2.2803	-132	-127
Gene	TF_Name	Z-Score	Start	End
pycom15g25110	W_box_WRKY	1.6889	-804	-799
pycom15g25110	W_box_WRKY	1.6889	-736	-731
pycom15g25110	Myb_box2_MYB	2.9488	-328	-323
pycom15g25110	Myb_box3_MYB	2.4402	-234	-229
pycom15g25110	Myb_box5_MYB	2.2939	-228	-223
pycom15g25110	Myb_box5_MYB	2.2939	-272	-267
pycom15g25110	Myb_box5_MYB	2.2939	-560	-555
pycom15g25110	Myb_box1_MYB	2.4764	-560	-555
Gene	TF_Name	Z-Score	Start	End
pycom15g25210	W_box_WRKY	2.2458	-891	-886
pycom15g25210	DREB_AP2_EREBP	2.6685	-728	-723
pycom15g25210	Myb_box3_MYB	2.1551	-448	-443
pycom15g25210	Myb_box5_MYB	2.0036	-187	-182
pycom15g25210	Myb_box5_MYB	2.0036	-257	-252
pycom15g25210	Myb_box5_MYB	2.0036	-839	-834
Gene	TF_Name	Z-Score	Start	End
pycom15g25350	N_box_bHLH	2.8841	-741	-736
pycom15g25350	Myb_box5_MYB	2.9741	-814	-809
pycom15g25350	G_box2_bZIP	2.3294	-226	-221
pycom15g25350	Nac_box_NAC	2.9572	-800	-795
pycom15g25350	G_box_bHLH	3.5173	-795	-790
pycom15g25350	W_box_WRKY	1.6146	-416	-411
pycom15g25350	W_box_WRKY	1.6146	-731	-726
pycom15g25350	Myb_box1_MYB	3.0662	-814	-809
Gene	TF_Name	Z-Score	Start	End
pycom15g32990	Nac_box_NAC	2.7261	-633	-628
pycom15g32990	Myb_box1_MYB	2.8473	-832	-827
pycom15g32990	Myb_box5_MYB	2.8041	-832	-827
Gene	TF_Name	Z-Score	Start	End
pycom15g34510	Myb_box5_MYB	1.6624	-9	-4
pycom15g34510	Myb_box5_MYB	1.6624	-61	-56
pycom15g34510	DREB_AP2_EREBP	2.242	-670	-665
pycom15g34510	Myb_box2_MYB	2.296	-8	-3
pycom15g34510	Myb_box2_MYB	2.296	-75	-70
pycom15g34510	N_box_bHLH	2.2507	-674	-669
pycom15g34510	C_ABRE_bZIP	3.2132	-931	-926
Gene	TF_Name	Z-Score	Start	End
pycom15g36350	Myb_box1_MYB	2.4233	-457	-452
pycom15g36350	Myb_box1_MYB	2.4233	-459	-454
pycom15g36350	W_box_WRKY	1.8023	-325	-320
pycom15g36350	W_box_WRKY	1.8023	-533	-528
pycom15g36350	N_box_bHLH	2.2681	-58	-53
pycom15g36350	G_ABRE_bZIP	2.5108	-548	-541
pycom15g36350	DREB_AP2_EREBP	2.8755	-11	-6
pycom15g36350	Myb_box4_MYB	2.3254	-776	-770
pycom15g36350	Myb_box5_MYB	2.3941	-457	-452
pycom15g36350	Myb_box5_MYB	2.3941	-459	-454
pycom15g36350	GCC_box_AP2_EREBP	3.6669	-8	-3
pycom15g36350	GCC_box_AP2_EREBP	3.6669	-6	-1
pycom15g36350	GCC_box_AP2_EREBP	3.6669	-9	-4
Gene	TF_Name	Z-Score	Start	End
pycom15g36590	GCC_box_AP2_EREBP	3.3994	-81	-76
pycom15g36590	GCC_box_AP2_EREBP	3.3994	-205	-200
pycom15g36590	Myb_box4_MYB	2.0545	-665	-659
pycom15g36590	DREB_AP2_EREBP	2.7845	-273	-268
pycom15g36590	DREB_AP2_EREBP	2.7845	-207	-202
pycom15g36590	W_box_WRKY	1.7691	-227	-222
pycom15g36590	Myb_box2_MYB	2.1445	-772	-767
pycom15g36590	Myb_box2_MYB	2.1445	-151	-146
Gene	TF_Name	Z-Score	Start	End
pycom15g38520	W_box_WRKY	2.3762	-741	-736
pycom15g38520	W_box_WRKY	2.3762	-457	-452
pycom15g38520	AuxRE_ARF	2.9168	-305	-300
pycom15g38520	Nac_box_NAC	2.9666	-159	-154
Gene	TF_Name	Z-Score	Start	End
pycom16g04100	Myb_box1_MYB	2.3478	-69	-64
pycom16g04100	Myb_box1_MYB	2.3478	-553	-548
pycom16g04100	Myb_box2_MYB	3.0781	-595	-590
pycom16g04100	Myb_box5_MYB	2.2594	-594	-589
pycom16g04100	Myb_box5_MYB	2.2594	-553	-548
pycom16g04100	Myb_box5_MYB	2.2594	-983	-978
pycom16g04100	Myb_box5_MYB	2.2594	-494	-489
pycom16g04100	Myb_box5_MYB	2.2594	-69	-64
pycom16g04100	Myb_box5_MYB	2.2594	-516	-511
pycom16g04100	Myb_box5_MYB	2.2594	-314	-309
Gene	TF_Name	Z-Score	Start	End
pycom16g05540	Nac_box_NAC	2.6607	-968	-963
pycom16g05540	N_box_bHLH	3.135	-27	-22
pycom16g05540	Myb_box4_MYB	2.3924	-41	-35
pycom16g05540	Myb_box5_MYB	1.8907	-954	-949
pycom16g05540	Myb_box5_MYB	1.8907	-139	-134
pycom16g05540	Myb_box5_MYB	1.8907	-192	-187
pycom16g05540	Myb_box5_MYB	1.8907	-523	-518
pycom16g05540	G_box_bHLH	3.1537	-592	-587
pycom16g05540	Myb_box1_MYB	2.0346	-192	-187
pycom16g05540	Myb_box1_MYB	2.0346	-954	-949
Gene	TF_Name	Z-Score	Start	End
pycom16g05640	Myb_box3_MYB	2.1646	-711	-706
pycom16g05640	DREB_AP2_EREBP	2.7291	-171	-166
pycom16g05640	DREB_AP2_EREBP	2.7291	-167	-162
pycom16g05640	Myb_box5_MYB	2.852	-967	-962
Gene	TF_Name	Z-Score	Start	End
pycom16g06500	Myb_box5_MYB	2.4361	-746	-741
pycom16g06500	Myb_box2_MYB	2.5573	-805	-800
pycom16g06500	Myb_box2_MYB	2.5573	-747	-742
pycom16g06500	G_box2_bZIP	1.7241	-776	-771
Gene	TF_Name	Z-Score	Start	End
pycom16g06630	W_box_WRKY	2.0372	-479	-474
pycom16g06630	Myb_box2_MYB	2.6214	-434	-429
pycom16g06630	Myb_box5_MYB	1.8235	-81	-76
pycom16g06630	Myb_box5_MYB	1.8235	-961	-956
pycom16g06630	Myb_box3_MYB	1.9222	-999	-994
pycom16g06630	Myb_box1_MYB	1.9204	-81	-76
Gene	TF_Name	Z-Score	Start	End
pycom16g06800	Myb_box5_MYB	2.9976	-399	-394
pycom16g06800	Nac_box_NAC	2.7576	-718	-713
pycom16g06800	Myb_box2_MYB	3.0862	-531	-526
pycom16g06800	Myb_box2_MYB	3.0862	-87	-82
pycom16g06800	Myb_box1_MYB	2.9574	-399	-394
Gene	TF_Name	Z-Score	Start	End
pycom16g06840	Myb_box1_MYB	2.8095	-614	-609
pycom16g06840	Myb_box5_MYB	2.7266	-614	-609
pycom16g06840	W_box_WRKY	2.0911	-501	-496
Gene	TF_Name	Z-Score	Start	End
pycom16g07210	Myb_box5_MYB	2.1171	-209	-204
pycom16g07210	Myb_box5_MYB	2.1171	-542	-537
pycom16g07210	Myb_box1_MYB	2.2872	-209	-204
pycom16g07210	N_box_bHLH	2.799	-128	-123
pycom16g07210	G_box_bHLH	3.4994	-968	-963
pycom16g07210	G_box_bHLH	3.4994	-135	-130
Gene	TF_Name	Z-Score	Start	End
pycom16g07750	Myb_box1_MYB	2.4101	-40	-35
pycom16g07750	Nac_box_NAC	3.0892	-866	-861
pycom16g07750	W_box_WRKY	1.7487	-956	-951
pycom16g07750	AuxRE_ARF	3.053	-629	-624
pycom16g07750	N_box_bHLH	3.5714	-254	-249
pycom16g07750	Myb_box5_MYB	2.2328	-71	-66
pycom16g07750	Myb_box5_MYB	2.2328	-40	-35
pycom16g07750	Myb_box5_MYB	2.2328	-69	-64
pycom16g07750	Myb_box2_MYB	2.9427	-199	-194
Gene	TF_Name	Z-Score	Start	End
pycom16g07810	Myb_box5_MYB	2.926	-583	-578
pycom16g07810	Myb_box5_MYB	2.926	-974	-969
pycom16g07810	Myb_box1_MYB	2.9556	-583	-578
pycom16g07810	Myb_box1_MYB	2.9556	-974	-969
pycom16g07810	W_box_WRKY	2.2888	-294	-289
Gene	TF_Name	Z-Score	Start	End
pycom16g08850	Myb_box1_MYB	2.2238	-268	-263
pycom16g08850	Myb_box3_MYB	2.2104	-688	-683
pycom16g08850	G_box_bHLH	3.3781	-664	-659
pycom16g08850	HSE1_HSF	1.6332	-450	-443
pycom16g08850	Myb_box5_MYB	2.0879	-464	-459
pycom16g08850	Myb_box5_MYB	2.0879	-885	-880
pycom16g08850	Myb_box5_MYB	2.0879	-268	-263
pycom16g08850	Myb_box5_MYB	2.0879	-154	-149
pycom16g08850	Myb_box2_MYB	2.7434	-807	-802
pycom16g08850	HBE_HB	1.5575	-623	-615
Gene	TF_Name	Z-Score	Start	End
pycom16g10430	W_box_WRKY	2.1868	-348	-343
pycom16g10430	W_box_WRKY	2.1868	-907	-902
pycom16g10430	W_box_WRKY	2.1868	-70	-65
pycom16g10430	W_box_WRKY	2.1868	-77	-72
pycom16g10430	Myb_box1_MYB	2.8969	-774	-769
pycom16g10430	Myb_box2_MYB	2.8696	-719	-714
pycom16g10430	Nac_box_NAC	2.7644	-291	-286
pycom16g10430	Myb_box5_MYB	2.8548	-774	-769
pycom16g10430	AuxRE_ARF	2.7192	-499	-494
Gene	TF_Name	Z-Score	Start	End
pycom16g10660	Myb_box4_MYB	2.4519	-958	-952
pycom16g10660	ABRE_ABI3_VP1	3.4047	-703	-694
pycom16g10660	Myb_box5_MYB	1.8183	-211	-206
pycom16g10660	Myb_box5_MYB	1.8183	-959	-954
pycom16g10660	GCC_box_AP2_EREBP	3.9118	-952	-947
Gene	TF_Name	Z-Score	Start	End
pycom16g10750	Myb_box2_MYB	2.7726	-227	-222
pycom16g10750	Myb_box5_MYB	1.9367	-295	-290
pycom16g10750	Myb_box5_MYB	1.9367	-421	-416
pycom16g10750	Myb_box5_MYB	1.9367	-937	-932
pycom16g10750	W_box_WRKY	2.0895	-370	-365
pycom16g10750	W_box_WRKY	2.0895	-495	-490
Gene	TF_Name	Z-Score	Start	End
pycom16g11060	G_box_bHLH	2.7223	-586	-581
pycom16g11060	Myb_box1_MYB	2.3177	-894	-889
pycom16g11060	Myb_box4_MYB	2.2261	-662	-656
pycom16g11060	Myb_box2_MYB	2.3167	-899	-894
pycom16g11060	Myb_box2_MYB	2.3167	-968	-963
pycom16g11060	AuxRE_ARF	2.143	-676	-671
pycom16g11060	W_box_WRKY	1.668	-742	-737
pycom16g11060	Myb_box5_MYB	2.2546	-894	-889
pycom16g11060	Myb_box5_MYB	2.2546	-807	-802
Gene	TF_Name	Z-Score	Start	End
pycom16g11260	Myb_box5_MYB	2.7681	-639	-634
pycom16g11260	Myb_box2_MYB	2.7108	-638	-633
pycom16g11260	Myb_box2_MYB	2.7108	-772	-767
pycom16g11260	Myb_box2_MYB	2.7108	-634	-629
pycom16g11260	AuxRE_ARF	2.6902	-293	-288
pycom16g11260	Myb_box1_MYB	2.0982	-510	-505
pycom16g11260	Nac_box_NAC	2.7403	-250	-245
Gene	TF_Name	Z-Score	Start	End
pycom16g16870	G_box_bHLH	3.4416	-367	-362
pycom16g16870	G_box_bHLH	3.4416	-233	-228
pycom16g16870	W_box_WRKY	2.3401	-226	-221
pycom16g16870	Myb_box1_MYB	1.5328	-547	-542
pycom16g16870	Myb_box3_MYB	2.2579	-547	-542
pycom16g16870	G_ABRE_bZIP	3.8292	-233	-226
pycom16g16870	Myb_box5_MYB	2.1495	-244	-239
pycom16g16870	Myb_box5_MYB	2.1495	-86	-81
pycom16g16870	Nac_box_NAC	2.9072	-252	-247
pycom16g16870	G_box2_bZIP	2.2774	-197	-192
Gene	TF_Name	Z-Score	Start	End
pycom16g17110	N_box_bHLH	2.2182	-633	-628
pycom16g17110	Myb_box5_MYB	2.3054	-741	-736
Gene	TF_Name	Z-Score	Start	End
pycom16g17320	Myb_box3_MYB	2.1945	-82	-77
pycom16g17320	W_box_WRKY	1.5517	-161	-156
pycom16g17320	W_box_WRKY	1.5517	-425	-420
pycom16g17320	W_box_WRKY	1.5517	-515	-510
pycom16g17320	GCC_box_AP2_EREBP	4.3515	-666	-661
pycom16g17320	Myb_box1_MYB	2.9547	-880	-875
pycom16g17320	C_ABRE_bZIP	3.9598	-632	-627
pycom16g17320	G_box2_bZIP	2.2357	-902	-897
pycom16g17320	N_box_bHLH	3.4419	-883	-878
pycom16g17320	Myb_box5_MYB	2.8916	-173	-168
pycom16g17320	Myb_box5_MYB	2.8916	-880	-875
Gene	TF_Name	Z-Score	Start	End
pycom17g00860	Nac_box_NAC	2.756	-384	-379
pycom17g00860	Myb_box2_MYB	2.9042	-28	-23
pycom17g00860	G_box2_bZIP	2.8612	-425	-420
pycom17g00860	Myb_box5_MYB	2.8844	-202	-197
pycom17g00860	N_box_bHLH	2.8023	-682	-677
Gene	TF_Name	Z-Score	Start	End
pycom17g02000	Myb_box5_MYB	2.3117	-264	-259
pycom17g02000	DREB_AP2_EREBP	2.2252	-486	-481
pycom17g02000	Nac_box_NAC	2.4153	-214	-209
pycom17g02000	Myb_box1_MYB	1.7947	-523	-518
Gene	TF_Name	Z-Score	Start	End
pycom17g03290	C_ABRE_bZIP	3.844	-723	-718
pycom17g03290	C_ABRE_bZIP	3.844	-841	-836
pycom17g03290	Myb_box2_MYB	2.8302	-813	-808
Gene	TF_Name	Z-Score	Start	End
pycom17g03900	Myb_box1_MYB	2.3728	-869	-864
pycom17g03900	Nac_box_NAC	3.0194	-613	-608
pycom17g03900	Nac_box_NAC	3.0194	-775	-770
pycom17g03900	Myb_box5_MYB	2.2886	-869	-864
pycom17g03900	C_ABRE_bZIP	4.2002	-152	-147
pycom17g03900	W_box_WRKY	2.4498	-125	-120
pycom17g03900	W_box_WRKY	2.4498	-354	-349
pycom17g03900	W_box_WRKY	2.4498	-399	-394
Gene	TF_Name	Z-Score	Start	End
pycom17g04390	G_box2_bZIP	2.0777	-552	-547
pycom17g04390	G_box2_bZIP	2.0777	-195	-190
Gene	TF_Name	Z-Score	Start	End
pycom17g06170	Myb_box4_MYB	1.9878	-374	-368
pycom17g06170	DREB_AP2_EREBP	2.1013	-309	-304
pycom17g06170	N_box_bHLH	2.083	-325	-320
pycom17g06170	N_box_bHLH	2.083	-305	-300
pycom17g06170	N_box_bHLH	2.083	-485	-480
pycom17g06170	W_box_WRKY	1.6644	-123	-118
pycom17g06170	Nac_box_NAC	2.3287	-54	-49
pycom17g06170	Myb_box5_MYB	2.2025	-806	-801
pycom17g06170	G_box_bHLH	2.789	-31	-26
pycom17g06170	Myb_box2_MYB	2.0948	-960	-955
pycom17g06170	Myb_box1_MYB	2.3355	-806	-801
pycom17g06170	G_ABRE_bZIP	3.1392	-31	-24
Gene	TF_Name	Z-Score	Start	End
pycom17g12140	Myb_box1_MYB	2.1027	-8	-3
pycom17g12140	Myb_box1_MYB	2.1027	-39	-34
pycom17g12140	G_box_bHLH	3.2917	-484	-479
pycom17g12140	AuxRE_ARF	2.7218	-835	-830
pycom17g12140	Myb_box3_MYB	2.0835	-746	-741
pycom17g12140	Myb_box5_MYB	1.9865	-8	-3
pycom17g12140	Myb_box5_MYB	1.9865	-39	-34
Gene	TF_Name	Z-Score	Start	End
pycom17g12200	Nac_box_NAC	2.8557	-822	-817
pycom17g12200	Nac_box_NAC	2.8557	-921	-916
pycom17g12200	G_box2_bZIP	2.2026	-87	-82
pycom17g12200	G_box_bHLH	3.3268	-98	-93
pycom17g12200	Myb_box5_MYB	2.0105	-417	-412
pycom17g12200	Myb_box5_MYB	2.0105	-747	-742
pycom17g12200	Myb_box1_MYB	2.1747	-417	-412
pycom17g12200	Myb_box1_MYB	2.1747	-747	-742
pycom17g12200	W_box_WRKY	1.5215	-345	-340
Gene	TF_Name	Z-Score	Start	End
pycom17g21970	N_box_bHLH	2.6008	-102	-97
pycom17g21970	Myb_box5_MYB	2.7026	-651	-646
pycom17g21970	Myb_box5_MYB	2.7026	-778	-773
pycom17g21970	Myb_box4_MYB	2.5075	-893	-887
pycom17g21970	Myb_box1_MYB	2.076	-868	-863
pycom17g21970	Myb_box1_MYB	2.076	-566	-561
pycom17g21970	Myb_box2_MYB	2.6567	-687	-682
Gene	TF_Name	Z-Score	Start	End
pycom17g22520	Myb_box1_MYB	2.1755	-886	-881
pycom17g22520	Myb_box5_MYB	2.0428	-886	-881
pycom17g22520	Myb_box5_MYB	2.0428	-17	-12
pycom17g22520	Myb_box5_MYB	2.0428	-736	-731
pycom17g22520	C_ABRE_bZIP	3.9914	-449	-444
Gene	TF_Name	Z-Score	Start	End
pycom17g26080	G_box2_bZIP	2.2429	-347	-342
pycom17g26080	G_box_bHLH	3.4366	-379	-374
pycom17g26080	G_box_bHLH	3.4366	-382	-377
pycom17g26080	Myb_box2_MYB	2.7108	-59	-54
pycom17g26080	N_box_bHLH	3.4943	-925	-920
pycom17g26080	N_box_bHLH	3.4943	-554	-549
pycom17g26080	Myb_box4_MYB	2.6817	-133	-127
pycom17g26080	Myb_box5_MYB	2.1172	-234	-229
pycom17g26080	AuxRE_ARF	2.7264	-734	-729
pycom17g26080	AuxRE_ARF	2.7264	-806	-801
Gene	TF_Name	Z-Score	Start	End
pycom17g26270	Myb_box1_MYB	1.7437	-919	-914
pycom17g26270	Myb_box5_MYB	2.5075	-619	-614
pycom17g26270	Myb_box3_MYB	1.7407	-159	-154
pycom17g26270	G_box2_bZIP	1.7427	-209	-204
pycom17g26270	AuxRE_ARF	2.3852	-489	-484
pycom17g26270	AuxRE_ARF	2.3852	-420	-415
pycom17g26270	Nac_box_NAC	2.3487	-958	-953
pycom17g26270	Nac_box_NAC	2.3487	-65	-60
Gene	TF_Name	Z-Score	Start	End
pycom17g26510	Myb_box5_MYB	3.0599	-544	-539
pycom17g26510	HSE1_HSF	1.853	-765	-758
pycom17g26510	Myb_box2_MYB	3.0619	-152	-147
pycom17g26510	Myb_box3_MYB	2.3533	-120	-115
pycom17g26510	Myb_box1_MYB	2.3871	-352	-347
Gene	TF_Name	Z-Score	Start	End
pycom17g26800	AuxRE_ARF	2.6111	-579	-574
pycom17g26800	AuxRE_ARF	2.6111	-29	-24
pycom17g26800	Myb_box5_MYB	1.8901	-102	-97
pycom17g26800	Myb_box5_MYB	1.8901	-338	-333
pycom17g26800	Myb_box2_MYB	2.5366	-980	-975
pycom17g26800	DREB_AP2_EREBP	2.5711	-121	-116
pycom17g26800	C_ABRE_bZIP	3.8078	-220	-215
Gene	TF_Name	Z-Score	Start	End
pycom17g27110	Myb_box3_MYB	2.1597	-631	-626
pycom17g27110	Myb_box3_MYB	2.1597	-492	-487
pycom17g27110	Nac_box_NAC	2.7829	-877	-872
pycom17g27110	Myb_box5_MYB	2.9315	-615	-610
pycom17g27110	Myb_box1_MYB	2.1785	-97	-92
pycom17g27110	AuxRE_ARF	2.7792	-209	-204
pycom17g27110	HSE1_HSF	1.5652	-302	-295
pycom17g27110	W_box_WRKY	2.2467	-827	-822

## Sheet: P. dulcis
Gene	TF_Name	Z-Score	Start	End
Prudul26A000847P1	Myb_box5_MYB	2.6404	-966	-961
Prudul26A000847P1	Myb_box3_MYB	1.97	-133	-128
Prudul26A000847P1	Myb_box1_MYB	2.7071	-966	-961
Prudul26A000847P1	Myb_box4_MYB	2.5377	-125	-119
Prudul26A000847P1	HSE1_HSF	1.6007	-889	-882
Gene	TF_Name	Z-Score	Start	End
Prudul26A000395P1	Myb_box1_MYB	2.3379	-361	-356
Prudul26A000395P1	Myb_box5_MYB	2.1925	-906	-901
Prudul26A000395P1	Myb_box5_MYB	2.1925	-361	-356
Prudul26A000395P1	Myb_box3_MYB	2.3315	-255	-250
Prudul26A000395P1	W_box_WRKY	1.7068	-382	-377
Prudul26A000395P1	Nac_box_NAC	3.0269	-561	-556
Gene	TF_Name	Z-Score	Start	End
Prudul26A000537P1	Myb_box1_MYB	2.2184	-357	-352
Prudul26A000537P1	AuxRE_ARF	2.7433	-684	-679
Prudul26A000537P1	Myb_box5_MYB	2.8538	-10	-5
Prudul26A000537P1	Myb_box2_MYB	2.6726	-597	-592
Prudul26A000537P1	Myb_box2_MYB	2.6726	-320	-315
Gene	TF_Name	Z-Score	Start	End
Prudul26A000805P1	HSE1_HSF	1.537	-91	-84
Prudul26A000805P1	Myb_box5_MYB	2.7915	-23	-18
Prudul26A000805P1	Myb_box3_MYB	2.1553	-440	-435
Prudul26A000805P1	W_box_WRKY	2.2605	-43	-38
Prudul26A000805P1	Myb_box1_MYB	2.8772	-23	-18
Prudul26A000805P1	AuxRE_ARF	2.7505	-863	-858
Prudul26A000805P1	G_box2_bZIP	2.2163	-636	-631
Gene	TF_Name	Z-Score	Start	End
Prudul26A000847P1	Myb_box5_MYB	2.219	-714	-709
Prudul26A000847P1	Myb_box5_MYB	2.219	-747	-742
Prudul26A000847P1	Myb_box3_MYB	2.3533	-441	-436
Prudul26A000847P1	AuxRE_ARF	3.0914	-354	-349
Prudul26A000847P1	AuxRE_ARF	3.0914	-897	-892
Prudul26A000847P1	G_box_bHLH	3.6701	-613	-608
Prudul26A000847P1	Myb_box1_MYB	1.553	-441	-436
Prudul26A000847P1	Myb_box4_MYB	2.9573	-796	-790
Prudul26A000847P1	DREB_AP2_EREBP	2.9868	-462	-457
Gene	TF_Name	Z-Score	Start	End
Prudul26A001745P1	Myb_box3_MYB	2.178	-978	-973
Prudul26A001745P1	Myb_box5_MYB	1.9472	-149	-144
Gene	TF_Name	Z-Score	Start	End
Prudul26A001183P1	N_box_bHLH	2.2009	-805	-800
Prudul26A001183P1	Myb_box3_MYB	1.7291	-162	-157
Prudul26A001183P1	Myb_box3_MYB	1.7291	-214	-209
Prudul26A001183P1	Myb_box4_MYB	2.1099	-517	-511
Gene	TF_Name	Z-Score	Start	End
Prudul26A001264P1	Nac_box_NAC	2.4058	-154	-149
Prudul26A001264P1	G_box_bHLH	2.9272	-440	-435
Prudul26A001264P1	Myb_box3_MYB	1.8363	-273	-268
Prudul26A001264P1	Myb_box3_MYB	1.8363	-616	-611
Prudul26A001264P1	Myb_box3_MYB	1.8363	-719	-714
Prudul26A001264P1	Myb_box3_MYB	1.8363	-811	-806
Prudul26A001264P1	G_box2_bZIP	1.8474	-755	-750
Prudul26A001264P1	Myb_box5_MYB	2.511	-652	-647
Gene	TF_Name	Z-Score	Start	End
Prudul26A001283P1	G_box_bHLH	2.9718	-601	-596
Prudul26A001283P1	G_box_bHLH	2.9718	-647	-642
Prudul26A001283P1	N_box_bHLH	2.3881	-330	-325
Prudul26A001283P1	W_box_WRKY	1.9558	-911	-906
Prudul26A001283P1	Myb_box2_MYB	2.3975	-715	-710
Prudul26A001283P1	Myb_box5_MYB	1.7886	-270	-265
Prudul26A001283P1	AuxRE_ARF	2.4275	-926	-921
Prudul26A001283P1	G_box2_bZIP	2.5454	-663	-658
Gene	TF_Name	Z-Score	Start	End
Prudul26A001657P1	Myb_box1_MYB	2.7828	-867	-862
Prudul26A001657P1	Myb_box5_MYB	2.7751	-867	-862
Prudul26A001657P1	N_box_bHLH	3.3495	-384	-379
Prudul26A001657P1	N_box_bHLH	3.3495	-864	-859
Prudul26A001657P1	Nac_box_NAC	2.6238	-494	-489
Prudul26A001657P1	AuxRE_ARF	2.51	-146	-141
Gene	TF_Name	Z-Score	Start	End
Prudul26A001745P1	Myb_box5_MYB	1.8083	-424	-419
Prudul26A001745P1	Myb_box5_MYB	1.8083	-344	-339
Prudul26A001745P1	Myb_box5_MYB	1.8083	-346	-341
Prudul26A001745P1	Myb_box5_MYB	1.8083	-12	-7
Prudul26A001745P1	Myb_box5_MYB	1.8083	-715	-710
Prudul26A001745P1	W_box_WRKY	2.0492	-499	-494
Prudul26A001745P1	Myb_box2_MYB	2.5352	-425	-420
Prudul26A001745P1	Myb_box4_MYB	2.4569	-430	-424
Prudul26A001745P1	Nac_box_NAC	2.6842	-340	-335
Prudul26A001745P1	Myb_box1_MYB	1.9746	-715	-710
Prudul26A001745P1	Myb_box1_MYB	1.9746	-12	-7
Gene	TF_Name	Z-Score	Start	End
Prudul26A001875P1	AuxRE_ARF	3.0371	-173	-168
Prudul26A001875P1	N_box_bHLH	3.0543	-190	-185
Prudul26A001875P1	Myb_box5_MYB	2.2502	-304	-299
Prudul26A001875P1	Myb_box5_MYB	2.2502	-306	-301
Prudul26A001875P1	HSE1_HSF	1.7749	-34	-27
Prudul26A001875P1	W_box_WRKY	1.5908	-53	-48
Gene	TF_Name	Z-Score	Start	End
Prudul26A001959P1	G_box2_bZIP	2.04	-351	-346
Prudul26A001959P1	AuxRE_ARF	2.5639	-406	-401
Prudul26A001959P1	AuxRE_ARF	2.5639	-642	-637
Prudul26A001959P1	Myb_box5_MYB	1.9096	-161	-156
Prudul26A001959P1	Myb_box5_MYB	1.9096	-159	-154
Prudul26A001959P1	Myb_box5_MYB	1.9096	-57	-52
Prudul26A001959P1	Myb_box5_MYB	1.9096	-59	-54
Prudul26A001959P1	Myb_box5_MYB	1.9096	-175	-170
Prudul26A001959P1	Myb_box5_MYB	1.9096	-72	-67
Prudul26A001959P1	Myb_box5_MYB	1.9096	-935	-930
Prudul26A001959P1	C_ABRE_bZIP	3.7611	-143	-138
Prudul26A001959P1	Myb_box2_MYB	2.6754	-900	-895
Prudul26A001959P1	Myb_box3_MYB	2.0233	-571	-566
Gene	TF_Name	Z-Score	Start	End
Prudul26A001987P1	Myb_box3_MYB	2.2473	-213	-208
Prudul26A001987P1	Myb_box3_MYB	2.2473	-609	-604
Prudul26A001987P1	W_box_WRKY	2.2663	-844	-839
Prudul26A001987P1	HSE1_HSF	1.7306	-838	-831
Prudul26A001987P1	DREB_AP2_EREBP	2.8888	-425	-420
Prudul26A001987P1	Myb_box1_MYB	1.5628	-213	-208
Prudul26A001987P1	Myb_box1_MYB	1.5628	-609	-604
Gene	TF_Name	Z-Score	Start	End
Prudul26A002137P1	Myb_box5_MYB	1.7559	-715	-710
Prudul26A002137P1	Myb_box5_MYB	1.7559	-115	-110
Prudul26A002137P1	Myb_box5_MYB	1.7559	-679	-674
Prudul26A002137P1	DREB_AP2_EREBP	2.4045	-25	-20
Prudul26A002137P1	G_box2_bZIP	1.8403	-1000	-995
Prudul26A002137P1	AuxRE_ARF	2.5024	-635	-630
Prudul26A002137P1	Myb_box1_MYB	1.864	-115	-110
Prudul26A002137P1	Myb_box3_MYB	1.8707	-544	-539
Gene	TF_Name	Z-Score	Start	End
Prudul26A002518P1	Myb_box4_MYB	2.704	-520	-514
Prudul26A002518P1	Myb_box4_MYB	2.704	-877	-871
Prudul26A002518P1	Myb_box4_MYB	2.704	-882	-876
Prudul26A002518P1	Myb_box1_MYB	2.9641	-66	-61
Prudul26A002518P1	Myb_box1_MYB	2.9641	-134	-129
Prudul26A002518P1	N_box_bHLH	2.7872	-12	-7
Prudul26A002518P1	Myb_box5_MYB	2.882	-134	-129
Prudul26A002518P1	Myb_box5_MYB	2.882	-66	-61
Prudul26A002518P1	W_box_WRKY	1.549	-494	-489
Prudul26A002518P1	G_box2_bZIP	2.2536	-432	-427
Prudul26A002518P1	DREB_AP2_EREBP	2.7893	-81	-76
Prudul26A002518P1	Nac_box_NAC	2.8784	-747	-742
Gene	TF_Name	Z-Score	Start	End
Prudul26A002893P1	HSE1_HSF	1.8731	-616	-609
Prudul26A002893P1	HSE1_HSF	1.8731	-884	-877
Prudul26A002893P1	Myb_box2_MYB	2.927	-229	-224
Prudul26A002893P1	AuxRE_ARF	2.9727	-593	-588
Prudul26A002893P1	N_box_bHLH	2.9394	-113	-108
Prudul26A002893P1	G_box_bHLH	3.637	-959	-954
Prudul26A002893P1	C_ABRE_bZIP	4.2595	-133	-128
Prudul26A002893P1	Myb_box1_MYB	1.6301	-818	-813
Prudul26A002893P1	Myb_box5_MYB	2.2324	-63	-58
Prudul26A002893P1	Myb_box5_MYB	2.2324	-119	-114
Prudul26A002893P1	Myb_box3_MYB	2.3601	-818	-813
Prudul26A002893P1	W_box_WRKY	1.6571	-408	-403
Prudul26A002893P1	W_box_WRKY	1.6571	-765	-760
Gene	TF_Name	Z-Score	Start	End
Prudul26A003177P1	N_box_bHLH	2.6976	-586	-581
Prudul26A003177P1	Myb_box2_MYB	2.6673	-120	-115
Prudul26A003177P1	Myb_box2_MYB	2.6673	-725	-720
Prudul26A003177P1	AuxRE_ARF	2.5525	-438	-433
Prudul26A003177P1	G_box2_bZIP	2.7584	-591	-586
Prudul26A003177P1	Myb_box5_MYB	2.816	-726	-721
Prudul26A003177P1	Myb_box3_MYB	2.0899	-339	-334
Prudul26A003177P1	DREB_AP2_EREBP	3.362	-768	-763
Gene	TF_Name	Z-Score	Start	End
Prudul26A003347P1	Myb_box4_MYB	2.4908	-744	-738
Prudul26A003347P1	AuxRE_ARF	2.5879	-229	-224
Prudul26A003347P1	AuxRE_ARF	2.5879	-198	-193
Prudul26A003347P1	DREB_AP2_EREBP	2.5123	-529	-524
Prudul26A003347P1	Myb_box5_MYB	1.8591	-564	-559
Prudul26A003347P1	Myb_box5_MYB	1.8591	-524	-519
Gene	TF_Name	Z-Score	Start	End
Prudul26A003894P1	Myb_box5_MYB	1.915	-246	-241
Prudul26A003894P1	DREB_AP2_EREBP	3.2093	-470	-465
Prudul26A003894P1	N_box_bHLH	3.1886	-449	-444
Gene	TF_Name	Z-Score	Start	End
Prudul26A003894P1	N_box_bHLH	3.2103	-696	-691
Prudul26A003894P1	Myb_box5_MYB	1.9088	-493	-488
Prudul26A003894P1	DREB_AP2_EREBP	3.2377	-717	-712
Gene	TF_Name	Z-Score	Start	End
Prudul26A003894P1	N_box_bHLH	2.6776	-292	-287
Prudul26A003894P1	Myb_box3_MYB	2.147	-654	-649
Prudul26A003894P1	Nac_box_NAC	2.7138	-742	-737
Prudul26A003894P1	Nac_box_NAC	2.7138	-739	-734
Prudul26A003894P1	W_box_WRKY	1.5302	-884	-879
Prudul26A003894P1	DREB_AP2_EREBP	3.2706	-130	-125
Prudul26A003894P1	Myb_box5_MYB	2.7636	-73	-68
Prudul26A003894P1	G_box2_bZIP	2.1199	-391	-386
Prudul26A003894P1	HSE1_HSF	1.6269	-15	-8
Prudul26A003894P1	Myb_box1_MYB	2.8102	-73	-68
Gene	TF_Name	Z-Score	Start	End
Prudul26A004090P1	Myb_box3_MYB	2.2913	-605	-600
Prudul26A004090P1	Myb_box1_MYB	1.5823	-605	-600
Prudul26A004090P1	AuxRE_ARF	2.8026	-438	-433
Prudul26A004090P1	AuxRE_ARF	2.8026	-64	-59
Prudul26A004090P1	AuxRE_ARF	2.8026	-67	-62
Prudul26A004090P1	Myb_box5_MYB	2.1867	-567	-562
Prudul26A004090P1	GCC_box_AP2_EREBP	4.3836	-256	-251
Prudul26A004090P1	W_box_WRKY	1.5923	-208	-203
Prudul26A004090P1	C_ABRE_bZIP	4.0252	-244	-239
Gene	TF_Name	Z-Score	Start	End
Prudul26A004097P1	Myb_box5_MYB	1.9315	-200	-195
Prudul26A004097P1	Myb_box5_MYB	1.9315	-82	-77
Prudul26A004097P1	Myb_box5_MYB	1.9315	-374	-369
Prudul26A004097P1	Myb_box5_MYB	1.9315	-806	-801
Prudul26A004097P1	Myb_box5_MYB	1.9315	-896	-891
Prudul26A004097P1	Myb_box4_MYB	2.5884	-23	-17
Prudul26A004097P1	Nac_box_NAC	2.5906	-458	-453
Prudul26A004097P1	G_box_bHLH	3.1083	-111	-106
Prudul26A004097P1	G_box_bHLH	3.1083	-108	-103
Gene	TF_Name	Z-Score	Start	End
Prudul26A004291P1	Myb_box1_MYB	2.739	-315	-310
Prudul26A004291P1	N_box_bHLH	2.5271	-281	-276
Prudul26A004291P1	Myb_box5_MYB	2.6459	-68	-63
Prudul26A004291P1	Myb_box5_MYB	2.6459	-315	-310
Prudul26A004291P1	G_box_bHLH	3.1437	-865	-860
Prudul26A004291P1	Myb_box3_MYB	2.0228	-805	-800
Gene	TF_Name	Z-Score	Start	End
Prudul26A004319P1	G_box2_bZIP	1.9162	-756	-751
Prudul26A004319P1	G_box2_bZIP	1.9162	-871	-866
Prudul26A004319P1	Myb_box1_MYB	1.915	-338	-333
Prudul26A004319P1	AuxRE_ARF	2.4823	-612	-607
Prudul26A004319P1	Myb_box5_MYB	1.8124	-336	-331
Prudul26A004319P1	Myb_box5_MYB	1.8124	-855	-850
Prudul26A004319P1	Myb_box5_MYB	1.8124	-338	-333
Prudul26A004319P1	DREB_AP2_EREBP	3.0609	-833	-828
Prudul26A004319P1	C_ABRE_bZIP	3.4656	-764	-759
Gene	TF_Name	Z-Score	Start	End
Prudul26A004353P1	AuxRE_ARF	2.5921	-262	-257
Prudul26A004353P1	Nac_box_NAC	2.6654	-19	-14
Prudul26A004353P1	Myb_box1_MYB	2.0677	-125	-120
Prudul26A004353P1	Myb_box1_MYB	2.0677	-241	-236
Prudul26A004353P1	Myb_box5_MYB	1.9616	-125	-120
Prudul26A004353P1	Myb_box5_MYB	1.9616	-241	-236
Prudul26A004353P1	GCC_box_AP2_EREBP	4.2216	-453	-448
Gene	TF_Name	Z-Score	Start	End
Prudul26A004464P1	DREB_AP2_EREBP	2.7035	-412	-407
Prudul26A004464P1	DREB_AP2_EREBP	2.7035	-333	-328
Prudul26A004464P1	Myb_box5_MYB	2.7901	-886	-881
Prudul26A004464P1	Nac_box_NAC	2.7615	-48	-43
Prudul26A004464P1	Myb_box1_MYB	2.8616	-886	-881
Gene	TF_Name	Z-Score	Start	End
Prudul26A005574P1	Myb_box5_MYB	2.0367	-909	-904
Prudul26A005574P1	Myb_box5_MYB	2.0367	-100	-95
Prudul26A005574P1	Myb_box5_MYB	2.0367	-345	-340
Prudul26A005574P1	Myb_box5_MYB	2.0367	-975	-970
Prudul26A005574P1	W_box_WRKY	2.2686	-81	-76
Prudul26A005574P1	W_box_WRKY	2.2686	-161	-156
Prudul26A005574P1	Myb_box3_MYB	2.1229	-587	-582
Gene	TF_Name	Z-Score	Start	End
Prudul26A005588P1	Myb_box1_MYB	2.9321	-651	-646
Prudul26A005588P1	G_box2_bZIP	2.2287	-76	-71
Prudul26A005588P1	Myb_box2_MYB	2.9994	-164	-159
Prudul26A005588P1	Myb_box5_MYB	2.8866	-651	-646
Gene	TF_Name	Z-Score	Start	End
Prudul26A005627P1	Myb_box1_MYB	1.7683	-854	-849
Prudul26A005627P1	Myb_box1_MYB	1.7683	-955	-950
Prudul26A005627P1	C_ABRE_bZIP	3.428	-75	-70
Prudul26A005627P1	G_box_bHLH	2.9316	-604	-599
Prudul26A005627P1	AuxRE_ARF	2.3133	-93	-88
Prudul26A005627P1	Myb_box5_MYB	1.6368	-854	-849
Prudul26A005627P1	Myb_box5_MYB	1.6368	-765	-760
Prudul26A005627P1	Myb_box5_MYB	1.6368	-955	-950
Prudul26A005627P1	Myb_box5_MYB	1.6368	-621	-616
Prudul26A005627P1	Myb_box5_MYB	1.6368	-546	-541
Prudul26A005627P1	Myb_box5_MYB	1.6368	-941	-936
Prudul26A005627P1	Myb_box5_MYB	1.6368	-935	-930
Prudul26A005627P1	Myb_box2_MYB	2.3492	-585	-580
Gene	TF_Name	Z-Score	Start	End
Prudul26A005891P1	DREB_AP2_EREBP	2.6781	-346	-341
Prudul26A005891P1	G_box2_bZIP	2.1939	-432	-427
Prudul26A005891P1	W_box_WRKY	1.6687	-295	-290
Prudul26A005891P1	Myb_box4_MYB	2.1133	-258	-252
Prudul26A005891P1	Myb_box5_MYB	2.1999	-283	-278
Gene	TF_Name	Z-Score	Start	End
Prudul26A006177P1	DREB_AP2_EREBP	2.365	-359	-354
Prudul26A006177P1	G_box2_bZIP	1.8054	-332	-327
Prudul26A006177P1	Myb_box2_MYB	2.4605	-792	-787
Prudul26A006177P1	Myb_box5_MYB	1.741	-791	-786
Gene	TF_Name	Z-Score	Start	End
Prudul26A006300P1	N_box_bHLH	2.8858	-613	-608
Prudul26A006300P1	Myb_box5_MYB	2.1372	-765	-760
Prudul26A006300P1	Myb_box5_MYB	2.1372	-153	-148
Prudul26A006300P1	Myb_box5_MYB	2.1372	-538	-533
Prudul26A006300P1	Myb_box1_MYB	2.2538	-538	-533
Prudul26A006300P1	Myb_box1_MYB	2.2538	-765	-760
Prudul26A006300P1	Myb_box1_MYB	2.2538	-153	-148
Prudul26A006300P1	Myb_box2_MYB	2.934	-263	-258
Prudul26A006300P1	W_box_WRKY	2.3067	-989	-984
Prudul26A006300P1	DREB_AP2_EREBP	2.902	-387	-382
Gene	TF_Name	Z-Score	Start	End
Prudul26A006572P1	Myb_box1_MYB	2.0129	-32	-27
Prudul26A006572P1	Myb_box1_MYB	2.0129	-140	-135
Prudul26A006572P1	G_box2_bZIP	2.0711	-64	-59
Prudul26A006572P1	Myb_box5_MYB	1.8728	-32	-27
Prudul26A006572P1	Myb_box5_MYB	1.8728	-140	-135
Prudul26A006572P1	Myb_box5_MYB	1.8728	-819	-814
Prudul26A006572P1	Myb_box2_MYB	2.6262	-86	-81
Prudul26A006572P1	Myb_box2_MYB	2.6262	-92	-87
Prudul26A006572P1	Myb_box2_MYB	2.6262	-872	-867
Prudul26A006572P1	G_box_bHLH	3.1423	-581	-576
Gene	TF_Name	Z-Score	Start	End
Prudul26A006612P1	N_box_bHLH	2.4661	-266	-261
Prudul26A006612P1	W_box_WRKY	2.0248	-182	-177
Prudul26A006612P1	Myb_box1_MYB	2.6754	-50	-45
Prudul26A006612P1	Nac_box_NAC	2.6435	-124	-119
Prudul26A006612P1	Nac_box_NAC	2.6435	-746	-741
Prudul26A006612P1	Myb_box3_MYB	1.9531	-365	-360
Prudul26A006612P1	Myb_box5_MYB	2.5794	-50	-45
Prudul26A006612P1	Myb_box4_MYB	2.4412	-347	-341
Prudul26A006612P1	Myb_box4_MYB	2.4412	-352	-346
Gene	TF_Name	Z-Score	Start	End
Prudul26A006733P1	N_box_bHLH	3.0777	-752	-747
Prudul26A006733P1	Myb_box5_MYB	2.3436	-832	-827
Prudul26A006733P1	Myb_box5_MYB	2.3436	-239	-234
Prudul26A006733P1	Myb_box5_MYB	2.3436	-665	-660
Prudul26A006733P1	Myb_box1_MYB	2.4793	-239	-234
Prudul26A006733P1	Myb_box1_MYB	2.4793	-665	-660
Prudul26A006733P1	W_box_WRKY	1.8428	-900	-895
Gene	TF_Name	Z-Score	Start	End
Prudul26A006834P1	G_box_bHLH	3.3451	-107	-102
Prudul26A006834P1	W_box_WRKY	2.1621	-864	-859
Prudul26A006834P1	W_box_WRKY	2.1621	-374	-369
Prudul26A006834P1	Myb_box1_MYB	2.9075	-469	-464
Prudul26A006834P1	Nac_box_NAC	2.7426	-883	-878
Prudul26A006834P1	Nac_box_NAC	2.7426	-932	-927
Prudul26A006834P1	Myb_box3_MYB	2.1308	-227	-222
Prudul26A006834P1	DREB_AP2_EREBP	2.7673	-621	-616
Prudul26A006834P1	G_box2_bZIP	2.8258	-919	-914
Prudul26A006834P1	Myb_box5_MYB	2.8693	-469	-464
Gene	TF_Name	Z-Score	Start	End
Prudul26A006908P1	W_box_WRKY	1.603	-359	-354
Prudul26A006908P1	AuxRE_ARF	2.87	-28	-23
Prudul26A006908P1	AuxRE_ARF	2.87	-920	-915
Prudul26A006908P1	AuxRE_ARF	2.87	-954	-949
Gene	TF_Name	Z-Score	Start	End
Prudul26A007031P1	Nac_box_NAC	2.5354	-168	-163
Prudul26A007031P1	Nac_box_NAC	2.5354	-947	-942
Prudul26A007031P1	Myb_box5_MYB	1.7677	-866	-861
Prudul26A007031P1	Myb_box5_MYB	1.7677	-45	-40
Prudul26A007031P1	G_box_bHLH	3.0442	-432	-427
Prudul26A007031P1	Myb_box3_MYB	1.9248	-931	-926
Gene	TF_Name	Z-Score	Start	End
Prudul26A007325P1	AuxRE_ARF	2.6643	-591	-586
Prudul26A007325P1	AuxRE_ARF	2.6643	-582	-577
Prudul26A007325P1	AuxRE_ARF	2.6643	-178	-173
Gene	TF_Name	Z-Score	Start	End
Prudul26A007598P1	Myb_box5_MYB	2.5239	-694	-689
Prudul26A007598P1	Nac_box_NAC	2.4245	-11	-6
Prudul26A007598P1	Myb_box1_MYB	2.5527	-694	-689
Gene	TF_Name	Z-Score	Start	End
Prudul26A007788P1	AuxRE_ARF	2.5729	-848	-843
Prudul26A007788P1	N_box_bHLH	2.5725	-280	-275
Prudul26A007788P1	Myb_box5_MYB	2.6346	-33	-28
Prudul26A007788P1	Myb_box5_MYB	2.6346	-338	-333
Gene	TF_Name	Z-Score	Start	End
Prudul26A007836P1	AuxRE_ARF	2.4322	-581	-576
Prudul26A007836P1	Myb_box1_MYB	1.8945	-141	-136
Prudul26A007836P1	Myb_box1_MYB	1.8945	-618	-613
Prudul26A007836P1	G_box_bHLH	2.9814	-741	-736
Prudul26A007836P1	G_box_bHLH	2.9814	-104	-99
Prudul26A007836P1	Myb_box5_MYB	1.7858	-141	-136
Prudul26A007836P1	Myb_box5_MYB	1.7858	-612	-607
Prudul26A007836P1	Myb_box5_MYB	1.7858	-182	-177
Prudul26A007836P1	Myb_box5_MYB	1.7858	-618	-613
Prudul26A007836P1	Myb_box5_MYB	1.7858	-747	-742
Gene	TF_Name	Z-Score	Start	End
Prudul26A008303P1	AuxRE_ARF	2.3023	-102	-97
Prudul26A008303P1	G_box_bHLH	2.8156	-412	-407
Prudul26A008303P1	G_box2_bZIP	2.3828	-983	-978
Prudul26A008303P1	Myb_box3_MYB	1.785	-443	-438
Gene	TF_Name	Z-Score	Start	End
Prudul26A008789P1	Myb_box5_MYB	2.4115	-934	-929
Prudul26A008789P1	Myb_box5_MYB	2.4115	-647	-642
Prudul26A008789P1	Myb_box2_MYB	3.3713	-648	-643
Prudul26A008789P1	Myb_box3_MYB	2.5255	-580	-575
Prudul26A008789P1	W_box_WRKY	1.8778	-918	-913
Prudul26A008789P1	Myb_box1_MYB	2.5496	-934	-929
Prudul26A008789P1	HSE1_HSF	2.0569	-981	-974
Gene	TF_Name	Z-Score	Start	End
Prudul26A008821P1	DREB_AP2_EREBP	2.8059	-150	-145
Prudul26A008821P1	W_box_WRKY	2.2493	-153	-148
Prudul26A008821P1	Myb_box1_MYB	3.0017	-926	-921
Prudul26A008821P1	Myb_box5_MYB	2.9121	-926	-921
Prudul26A008821P1	Myb_box5_MYB	2.9121	-928	-923
Prudul26A008821P1	AuxRE_ARF	2.7856	-399	-394
Prudul26A008821P1	Myb_box3_MYB	2.2189	-208	-203
Prudul26A008821P1	Myb_box2_MYB	2.819	-346	-341
Prudul26A008821P1	Myb_box2_MYB	2.819	-663	-658
Prudul26A008821P1	N_box_bHLH	2.798	-860	-855
Gene	TF_Name	Z-Score	Start	End
Prudul26A009133P1	W_box_WRKY	2.1198	-145	-140
Prudul26A009133P1	W_box_WRKY	2.1198	-51	-46
Prudul26A009133P1	Myb_box5_MYB	2.7188	-93	-88
Prudul26A009133P1	Myb_box1_MYB	2.7041	-93	-88
Prudul26A009133P1	Myb_box3_MYB	2.0386	-255	-250
Prudul26A009133P1	Myb_box3_MYB	2.0386	-281	-276
Gene	TF_Name	Z-Score	Start	End
Prudul26A009539P1	Myb_box1_MYB	3.72	-162	-157
Prudul26A009539P1	Myb_box1_MYB	3.72	-654	-649
Prudul26A009539P1	HSE1_HSF	1.5174	-239	-232
Prudul26A009539P1	Myb_box2_MYB	3.6711	-451	-446
Prudul26A009539P1	W_box_WRKY	2.9956	-509	-504
Prudul26A009539P1	W_box_WRKY	2.9956	-17	-12
Prudul26A009539P1	Nac_box_NAC	3.6829	-471	-466
Prudul26A009539P1	N_box_bHLH	3.5216	-979	-974
Prudul26A009539P1	Myb_box5_MYB	3.5505	-654	-649
Prudul26A009539P1	Myb_box5_MYB	3.5505	-162	-157
Gene	TF_Name	Z-Score	Start	End
Prudul26A009792P1	Myb_box5_MYB	2.8913	-998	-993
Prudul26A009792P1	G_box_bHLH	3.4115	-535	-530
Prudul26A009792P1	G_box_bHLH	3.4115	-498	-493
Prudul26A009792P1	G_ABRE_bZIP	3.7476	-498	-491
Prudul26A009792P1	Nac_box_NAC	2.8169	-976	-971
Prudul26A009792P1	W_box_WRKY	2.3166	-864	-859
Prudul26A009792P1	Myb_box1_MYB	2.97	-998	-993
Gene	TF_Name	Z-Score	Start	End
Prudul26A010058P1	Myb_box1_MYB	3.0592	-960	-955
Prudul26A010058P1	Myb_box3_MYB	2.2559	-621	-616
Prudul26A010058P1	AuxRE_ARF	2.8373	-639	-634
Prudul26A010058P1	AuxRE_ARF	2.8373	-636	-631
Prudul26A010058P1	W_box_WRKY	1.545	-660	-655
Prudul26A010058P1	Myb_box5_MYB	3.0296	-960	-955
Gene	TF_Name	Z-Score	Start	End
Prudul26A010156P1	Myb_box1_MYB	1.8745	-126	-121
Prudul26A010156P1	AuxRE_ARF	2.4244	-929	-924
Prudul26A010156P1	Myb_box2_MYB	2.6735	-896	-891
Prudul26A010156P1	G_ABRE_bZIP	2.6811	-472	-465
Prudul26A010156P1	Myb_box5_MYB	1.8246	-126	-121
Prudul26A010156P1	Myb_box5_MYB	1.8246	-319	-314
Gene	TF_Name	Z-Score	Start	End
Prudul26A010627P1	W_box_WRKY	1.6271	-195	-190
Prudul26A010627P1	W_box_WRKY	1.6271	-839	-834
Prudul26A010627P1	Myb_box5_MYB	2.1841	-953	-948
Prudul26A010627P1	Myb_box1_MYB	1.5607	-860	-855
Prudul26A010627P1	Myb_box3_MYB	2.3015	-860	-855
Gene	TF_Name	Z-Score	Start	End
Prudul26A011353P1	W_box_WRKY	1.6932	-240	-235
Prudul26A011353P1	N_box_bHLH	3.0095	-586	-581
Prudul26A011353P1	G_box2_bZIP	2.3836	-146	-141
Gene	TF_Name	Z-Score	Start	End
Prudul26A011562P1	Myb_box1_MYB	2.1285	-501	-496
Prudul26A011562P1	Myb_box2_MYB	2.8733	-252	-247
Prudul26A011562P1	W_box_WRKY	1.5019	-443	-438
Prudul26A011562P1	Myb_box4_MYB	2.7538	-247	-241
Prudul26A011562P1	Myb_box5_MYB	2.0012	-520	-515
Prudul26A011562P1	Myb_box5_MYB	2.0012	-501	-496
Gene	TF_Name	Z-Score	Start	End
Prudul26A011712P1	AuxRE_ARF	2.7541	-894	-889
Prudul26A011712P1	AuxRE_ARF	2.7541	-287	-282
Prudul26A011712P1	AuxRE_ARF	2.7541	-290	-285
Prudul26A011712P1	N_box_bHLH	3.5758	-960	-955
Prudul26A011712P1	G_box_bHLH	3.578	-963	-958
Prudul26A011712P1	Myb_box5_MYB	3.0008	-973	-968
Prudul26A011712P1	Nac_box_NAC	2.9837	-514	-509
Prudul26A011712P1	Nac_box_NAC	2.9837	-742	-737
Gene	TF_Name	Z-Score	Start	End
Prudul26A011712P1	Myb_box1_MYB	2.2041	-950	-945
Prudul26A011712P1	Myb_box1_MYB	2.2041	-599	-594
Prudul26A011712P1	G_box_bHLH	3.4058	-551	-546
Prudul26A011712P1	W_box_WRKY	2.2608	-491	-486
Prudul26A011712P1	W_box_WRKY	2.2608	-61	-56
Prudul26A011712P1	N_box_bHLH	2.8355	-496	-491
Prudul26A011712P1	Myb_box5_MYB	2.1129	-950	-945
Prudul26A011712P1	Myb_box5_MYB	2.1129	-599	-594
Prudul26A011712P1	Myb_box5_MYB	2.1129	-952	-947
Prudul26A011712P1	G_box2_bZIP	2.2155	-526	-521
Prudul26A011712P1	DREB_AP2_EREBP	2.8293	-560	-555
Gene	TF_Name	Z-Score	Start	End
Prudul26A011712P1	AuxRE_ARF	2.7541	-894	-889
Prudul26A011712P1	AuxRE_ARF	2.7541	-287	-282
Prudul26A011712P1	AuxRE_ARF	2.7541	-290	-285
Prudul26A011712P1	N_box_bHLH	3.5758	-960	-955
Prudul26A011712P1	G_box_bHLH	3.578	-963	-958
Prudul26A011712P1	Myb_box5_MYB	3.0008	-973	-968
Prudul26A011712P1	Nac_box_NAC	2.9837	-514	-509
Prudul26A011712P1	Nac_box_NAC	2.9837	-742	-737
Gene	TF_Name	Z-Score	Start	End
Prudul26A012132P1	Nac_box_NAC	2.9066	-118	-113
Prudul26A012132P1	Myb_box1_MYB	2.3063	-606	-601
Prudul26A012132P1	Myb_box1_MYB	2.3063	-308	-303
Prudul26A012132P1	Myb_box1_MYB	2.3063	-581	-576
Prudul26A012132P1	W_box_WRKY	2.3488	-838	-833
Prudul26A012132P1	Myb_box5_MYB	3.1204	-785	-780
Gene	TF_Name	Z-Score	Start	End
Prudul26A012395P1	AuxRE_ARF	2.6738	-398	-393
Prudul26A012395P1	Myb_box5_MYB	2.7823	-7	-2
Prudul26A012395P1	Myb_box4_MYB	2.5244	-223	-217
Prudul26A012395P1	Myb_box3_MYB	2.0985	-647	-642
Prudul26A012395P1	Myb_box1_MYB	2.8728	-7	-2
Prudul26A012395P1	Nac_box_NAC	2.8257	-756	-751
Prudul26A012395P1	G_box_bHLH	3.3595	-664	-659
Prudul26A012395P1	G_box_bHLH	3.3595	-639	-634
Gene	TF_Name	Z-Score	Start	End
Prudul26A012908P1	G_box2_bZIP	2.0526	-793	-788
Prudul26A012908P1	AuxRE_ARF	2.6073	-767	-762
Prudul26A012908P1	AuxRE_ARF	2.6073	-817	-812
Prudul26A012908P1	N_box_bHLH	3.2882	-329	-324
Prudul26A012908P1	N_box_bHLH	3.2882	-753	-748
Prudul26A012908P1	G_box_bHLH	3.2222	-813	-808
Prudul26A012908P1	G_box_bHLH	3.2222	-808	-803
Gene	TF_Name	Z-Score	Start	End
Prudul26A012953P1	HBE_HB	2.0779	-565	-557
Prudul26A012953P1	Nac_box_NAC	2.7615	-706	-701
Prudul26A012953P1	Nac_box_NAC	2.7615	-200	-195
Prudul26A012953P1	W_box_WRKY	2.1926	-496	-491
Prudul26A012953P1	HSE1_HSF	1.5354	-391	-384
Prudul26A012953P1	Myb_box3_MYB	2.1208	-970	-965
Prudul26A012953P1	Myb_box5_MYB	1.994	-256	-251
Prudul26A012953P1	Myb_box5_MYB	1.994	-468	-463
Prudul26A012953P1	Myb_box5_MYB	1.994	-930	-925
Prudul26A012953P1	Myb_box5_MYB	1.994	-486	-481
Prudul26A012953P1	Myb_box5_MYB	1.994	-84	-79
Gene	TF_Name	Z-Score	Start	End
Prudul26A013093P1	Myb_box1_MYB	2.9524	-193	-188
Prudul26A013093P1	DREB_AP2_EREBP	2.8013	-459	-454
Prudul26A013093P1	Myb_box3_MYB	2.1981	-775	-770
Prudul26A013093P1	Myb_box3_MYB	2.1981	-29	-24
Prudul26A013093P1	Myb_box5_MYB	2.9038	-193	-188
Gene	TF_Name	Z-Score	Start	End
Prudul26A013165P1	Myb_box1_MYB	2.0563	-964	-959
Prudul26A013165P1	G_box_bHLH	3.1888	-626	-621
Prudul26A013165P1	G_box_bHLH	3.1888	-658	-653
Prudul26A013165P1	Myb_box2_MYB	2.5156	-260	-255
Prudul26A013165P1	Myb_box5_MYB	1.9052	-964	-959
Prudul26A013165P1	Myb_box5_MYB	1.9052	-143	-138
Prudul26A013165P1	Nac_box_NAC	2.6916	-763	-758
Gene	TF_Name	Z-Score	Start	End
Prudul26A013370P1	DREB_AP2_EREBP	2.6292	-362	-357
Prudul26A013370P1	Myb_box1_MYB	1.5636	-48	-43
Prudul26A013370P1	Myb_box5_MYB	2.1627	-745	-740
Prudul26A013370P1	N_box_bHLH	2.6358	-482	-477
Prudul26A013370P1	GCC_box_AP2_EREBP	3.3974	-691	-686
Prudul26A013370P1	GCC_box_AP2_EREBP	3.3974	-330	-325
Gene	TF_Name	Z-Score	Start	End
Prudul26A013385P1	Myb_box4_MYB	2.3146	-583	-577
Prudul26A013385P1	G_ABRE_bZIP	3.0136	-106	-99
Prudul26A013385P1	Myb_box1_MYB	2.4192	-326	-321
Prudul26A013385P1	Myb_box1_MYB	2.4192	-976	-971
Prudul26A013385P1	Myb_box1_MYB	2.4192	-905	-900
Prudul26A013385P1	DREB_AP2_EREBP	2.2697	-208	-203
Prudul26A013385P1	Myb_box2_MYB	2.4321	-205	-200
Prudul26A013385P1	Nac_box_NAC	2.269	-541	-536
Prudul26A013385P1	Myb_box5_MYB	2.3937	-326	-321
Prudul26A013385P1	Myb_box5_MYB	2.3937	-976	-971
Prudul26A013385P1	Myb_box5_MYB	2.3937	-204	-199
Prudul26A013385P1	Myb_box5_MYB	2.3937	-206	-201
Prudul26A013385P1	Myb_box5_MYB	2.3937	-905	-900
Prudul26A013385P1	G_box_bHLH	2.7987	-106	-101
Prudul26A013385P1	G_box_bHLH	2.7987	-819	-814
Prudul26A013385P1	G_box_bHLH	2.7987	-842	-837
Gene	TF_Name	Z-Score	Start	End
Prudul26A013683P1	Myb_box2_MYB	3.1404	-330	-325
Prudul26A013683P1	Nac_box_NAC	2.8398	-412	-407
Prudul26A013683P1	Myb_box5_MYB	2.1741	-329	-324
Prudul26A013683P1	Myb_box5_MYB	2.1741	-338	-333
Prudul26A013683P1	Myb_box5_MYB	2.1741	-331	-326
Prudul26A013683P1	Myb_box4_MYB	3.0515	-335	-329
Gene	TF_Name	Z-Score	Start	End
Prudul26A013690P1	Myb_box2_MYB	2.5498	-238	-233
Prudul26A013690P1	Myb_box5_MYB	1.8774	-59	-54
Prudul26A013690P1	Myb_box5_MYB	1.8774	-649	-644
Prudul26A013690P1	Nac_box_NAC	2.7054	-684	-679
Prudul26A013690P1	Nac_box_NAC	2.7054	-601	-596
Prudul26A013690P1	W_box_WRKY	2.0337	-148	-143
Prudul26A013690P1	G_box_bHLH	3.2013	-623	-618
Prudul26A013690P1	Myb_box3_MYB	2.0203	-767	-762
Gene	TF_Name	Z-Score	Start	End
Prudul26A014113P1	AuxRE_ARF	2.4135	-72	-67
Prudul26A014113P1	AuxRE_ARF	2.4135	-350	-345
Prudul26A014113P1	Myb_box4_MYB	2.3141	-882	-876
Prudul26A014113P1	Myb_box5_MYB	2.4213	-555	-550
Prudul26A014113P1	DREB_AP2_EREBP	2.3214	-125	-120
Prudul26A014113P1	N_box_bHLH	2.3073	-901	-896
Gene	TF_Name	Z-Score	Start	End
Prudul26A014155P1	Myb_box1_MYB	2.8023	-178	-173
Prudul26A014155P1	Myb_box3_MYB	2.1182	-348	-343
Prudul26A014155P1	GCC_box_AP2_EREBP	4.1211	-124	-119
Prudul26A014155P1	GCC_box_AP2_EREBP	4.1211	-122	-117
Prudul26A014155P1	GCC_box_AP2_EREBP	4.1211	-121	-116
Prudul26A014155P1	DREB_AP2_EREBP	2.6185	-221	-216
Prudul26A014155P1	DREB_AP2_EREBP	2.6185	-303	-298
Prudul26A014155P1	G_box_bHLH	3.2394	-285	-280
Prudul26A014155P1	G_box_bHLH	3.2394	-101	-96
Prudul26A014155P1	G_box_bHLH	3.2394	-278	-273
Prudul26A014155P1	W_box_WRKY	2.2242	-107	-102
Prudul26A014155P1	Myb_box5_MYB	2.7064	-225	-220
Prudul26A014155P1	Myb_box5_MYB	2.7064	-223	-218
Prudul26A014155P1	Myb_box5_MYB	2.7064	-301	-296
Prudul26A014155P1	Myb_box5_MYB	2.7064	-178	-173
Prudul26A014155P1	N_box_bHLH	3.2472	-181	-176
Prudul26A014155P1	Myb_box2_MYB	2.7508	-224	-219
Gene	TF_Name	Z-Score	Start	End
Prudul26A014194P1	Myb_box4_MYB	2.4561	-844	-838
Prudul26A014194P1	Myb_box4_MYB	2.4561	-225	-219
Prudul26A014194P1	Myb_box4_MYB	2.4561	-200	-194
Prudul26A014194P1	Myb_box5_MYB	1.7527	-852	-847
Prudul26A014194P1	Myb_box5_MYB	1.7527	-850	-845
Prudul26A014194P1	Myb_box5_MYB	1.7527	-540	-535
Prudul26A014194P1	C_ABRE_bZIP	3.2813	-170	-165
Prudul26A014194P1	Myb_box2_MYB	2.5724	-851	-846
Prudul26A014194P1	Myb_box3_MYB	1.891	-232	-227
Prudul26A014194P1	G_box2_bZIP	1.8999	-381	-376
Gene	TF_Name	Z-Score	Start	End
Prudul26A014377P1	Myb_box5_MYB	2.0953	-106	-101
Prudul26A014377P1	HSE1_HSF	1.6243	-212	-205
Prudul26A014377P1	W_box_WRKY	1.5266	-507	-502
Prudul26A014377P1	AuxRE_ARF	2.8514	-15	-10
Prudul26A014377P1	Myb_box2_MYB	2.9083	-79	-74
Gene	TF_Name	Z-Score	Start	End
Prudul26A014408P1	Myb_box2_MYB	2.1358	-700	-695
Prudul26A014408P1	Myb_box2_MYB	2.1358	-132	-127
Prudul26A014408P1	W_box_WRKY	1.7196	-242	-237
Prudul26A014408P1	W_box_WRKY	1.7196	-306	-301
Prudul26A014408P1	W_box_WRKY	1.7196	-218	-213
Prudul26A014408P1	Myb_box1_MYB	1.6971	-495	-490
Prudul26A014408P1	Myb_box1_MYB	1.6971	-362	-357
Prudul26A014408P1	Myb_box5_MYB	2.3216	-701	-696
Prudul26A014408P1	AuxRE_ARF	2.2014	-950	-945
Prudul26A014408P1	AuxRE_ARF	2.2014	-924	-919
Gene	TF_Name	Z-Score	Start	End
Prudul26A014996P1	Myb_box5_MYB	2.1301	-132	-127
Prudul26A014996P1	Myb_box5_MYB	2.1301	-543	-538
Prudul26A014996P1	Myb_box1_MYB	2.2272	-132	-127
Prudul26A014996P1	DREB_AP2_EREBP	2.8897	-738	-733
Gene	TF_Name	Z-Score	Start	End
Prudul26A015184P1	Myb_box5_MYB	1.8527	-567	-562
Prudul26A015184P1	Myb_box5_MYB	1.8527	-231	-226
Prudul26A015184P1	Myb_box5_MYB	1.8527	-16	-11
Prudul26A015184P1	Myb_box5_MYB	1.8527	-569	-564
Prudul26A015184P1	Myb_box5_MYB	1.8527	-202	-197
Prudul26A015184P1	Myb_box5_MYB	1.8527	-711	-706
Prudul26A015184P1	Myb_box4_MYB	2.3959	-474	-468
Prudul26A015184P1	Myb_box2_MYB	2.4724	-257	-252
Prudul26A015184P1	Myb_box1_MYB	1.9802	-567	-562
Prudul26A015184P1	Myb_box1_MYB	1.9802	-16	-11
Gene	TF_Name	Z-Score	Start	End
Prudul26A015369P1	W_box_WRKY	1.9988	-505	-500
Prudul26A015369P1	Myb_box5_MYB	1.7965	-350	-345
Prudul26A015369P1	G_box2_bZIP	2.6258	-345	-340
Prudul26A015369P1	Myb_box3_MYB	1.9518	-646	-641
Prudul26A015369P1	Myb_box3_MYB	1.9518	-571	-566
Prudul26A015369P1	Myb_box2_MYB	2.4228	-854	-849
Prudul26A015369P1	DREB_AP2_EREBP	2.4324	-545	-540
Prudul26A015369P1	Myb_box1_MYB	1.9442	-350	-345
Prudul26A015369P1	AuxRE_ARF	2.4978	-638	-633
Prudul26A015369P1	AuxRE_ARF	2.4978	-215	-210
Gene	TF_Name	Z-Score	Start	End
Prudul26A015577P1	Nac_box_NAC	3.0468	-223	-218
Prudul26A015577P1	Nac_box_NAC	3.0468	-317	-312
Prudul26A015577P1	Myb_box2_MYB	3.0191	-378	-373
Prudul26A015577P1	Myb_box4_MYB	2.9326	-855	-849
Prudul26A015577P1	Myb_box5_MYB	2.2032	-813	-808
Prudul26A015577P1	Myb_box5_MYB	2.2032	-860	-855
Prudul26A015577P1	Myb_box5_MYB	2.2032	-128	-123
Prudul26A015577P1	Myb_box5_MYB	2.2032	-858	-853
Gene	TF_Name	Z-Score	Start	End
Prudul26A016161P1	HSE1_HSF	1.6561	-474	-467
Prudul26A016161P1	Nac_box_NAC	2.8832	-841	-836
Prudul26A016161P1	Nac_box_NAC	2.8832	-971	-966
Prudul26A016161P1	Myb_box2_MYB	2.9012	-82	-77
Prudul26A016161P1	DREB_AP2_EREBP	2.8765	-429	-424
Prudul26A016161P1	Myb_box5_MYB	2.9742	-81	-76
Prudul26A016161P1	G_box_bHLH	3.4902	-639	-634
Gene	TF_Name	Z-Score	Start	End
Prudul26A016558P1	G_box2_bZIP	2.3438	-244	-239
Prudul26A016558P1	Myb_box2_MYB	3.1743	-916	-911
Prudul26A016558P1	Myb_box5_MYB	2.2473	-113	-108
Prudul26A016558P1	Myb_box5_MYB	2.2473	-610	-605
Prudul26A016558P1	Myb_box3_MYB	2.3314	-446	-441
Prudul26A016558P1	Myb_box3_MYB	2.3314	-634	-629
Prudul26A016558P1	Myb_box1_MYB	1.582	-446	-441
Prudul26A016558P1	Myb_box1_MYB	1.582	-634	-629
Gene	TF_Name	Z-Score	Start	End
Prudul26A016727P1	Myb_box5_MYB	1.5475	-439	-434
Prudul26A016727P1	Myb_box5_MYB	1.5475	-428	-423
Prudul26A016727P1	Myb_box5_MYB	1.5475	-711	-706
Prudul26A016727P1	Myb_box5_MYB	1.5475	-636	-631
Prudul26A016727P1	Myb_box5_MYB	1.5475	-710	-705
Prudul26A016727P1	Myb_box3_MYB	2.39	-439	-434
Prudul26A016727P1	Nac_box_NAC	3.0154	-373	-368
Prudul26A016727P1	G_box2_bZIP	2.3969	-276	-271
Prudul26A016727P1	Myb_box2_MYB	3.1694	-893	-888
Prudul26A016727P1	Myb_box1_MYB	1.6936	-439	-434
Prudul26A016727P1	W_box_WRKY	1.7466	-644	-639
Prudul26A016727P1	DREB_AP2_EREBP	3.679	-107	-102
Prudul26A016727P1	AuxRE_ARF	3.0023	-435	-430
Gene	TF_Name	Z-Score	Start	End
Prudul26A016786P1	AuxRE_ARF	2.6847	-601	-596
Prudul26A016786P1	AuxRE_ARF	2.6847	-433	-428
Prudul26A016786P1	Myb_box1_MYB	2.7435	-295	-290
Prudul26A016786P1	Myb_box5_MYB	2.64	-295	-290
Prudul26A016786P1	Myb_box5_MYB	2.64	-162	-157
Prudul26A016786P1	Myb_box3_MYB	2.033	-643	-638
Prudul26A016786P1	Nac_box_NAC	2.6648	-231	-226
Prudul26A016786P1	Myb_box2_MYB	2.6656	-624	-619
Prudul26A016786P1	W_box_WRKY	2.1498	-212	-207
Prudul26A016786P1	W_box_WRKY	2.1498	-448	-443
Prudul26A016786P1	W_box_WRKY	2.1498	-679	-674
Gene	TF_Name	Z-Score	Start	End
Prudul26A016893P1	Myb_box5_MYB	1.9204	-745	-740
Prudul26A016893P1	Myb_box5_MYB	1.9204	-426	-421
Prudul26A016893P1	Myb_box5_MYB	1.9204	-849	-844
Prudul26A016893P1	Myb_box1_MYB	2.0579	-426	-421
Prudul26A016893P1	Myb_box1_MYB	2.0579	-849	-844
Prudul26A016893P1	N_box_bHLH	2.6212	-791	-786
Prudul26A016893P1	W_box_WRKY	2.0909	-139	-134
Prudul26A016893P1	W_box_WRKY	2.0909	-524	-519
Prudul26A016893P1	W_box_WRKY	2.0909	-633	-628
Prudul26A016893P1	G_box_bHLH	3.247	-812	-807
Prudul26A016893P1	Myb_box3_MYB	2.0385	-689	-684
Prudul26A016893P1	Myb_box3_MYB	2.0385	-952	-947
Gene	TF_Name	Z-Score	Start	End
Prudul26A016910P1	G_box2_bZIP	2.3191	-111	-106
Prudul26A016910P1	Myb_box1_MYB	2.3307	-983	-978
Prudul26A016910P1	W_box_WRKY	2.3143	-372	-367
Prudul26A016910P1	Myb_box5_MYB	2.2153	-983	-978
Prudul26A016910P1	DREB_AP2_EREBP	2.9744	-590	-585
Prudul26A016910P1	Nac_box_NAC	3.0061	-446	-441
Prudul26A016910P1	Myb_box3_MYB	2.2714	-245	-240
Gene	TF_Name	Z-Score	Start	End
Prudul26A016938P1	Myb_box2_MYB	2.9934	-871	-866
Prudul26A016938P1	Myb_box5_MYB	2.1679	-884	-879
Prudul26A016938P1	Myb_box5_MYB	2.1679	-653	-648
Prudul26A016938P1	Myb_box5_MYB	2.1679	-784	-779
Prudul26A016938P1	Myb_box5_MYB	2.1679	-655	-650
Prudul26A016938P1	Myb_box5_MYB	2.1679	-872	-867
Prudul26A016938P1	Myb_box1_MYB	2.2468	-653	-648
Prudul26A016938P1	AuxRE_ARF	2.8878	-210	-205
Prudul26A016938P1	Nac_box_NAC	2.8444	-155	-150
Gene	TF_Name	Z-Score	Start	End
Prudul26A017060P1	Myb_box5_MYB	2.0628	-230	-225
Prudul26A017060P1	Myb_box5_MYB	2.0628	-39	-34
Prudul26A017060P1	C_ABRE_bZIP	2.8783	-734	-729
Prudul26A017060P1	Myb_box1_MYB	2.1434	-230	-225
Prudul26A017060P1	DREB_AP2_EREBP	2.4538	-34	-29
Prudul26A017060P1	GCC_box_AP2_EREBP	3.1252	-32	-27
Prudul26A017060P1	GCC_box_AP2_EREBP	3.1252	-425	-420
Prudul26A017060P1	AuxRE_ARF	2.107	-367	-362
Gene	TF_Name	Z-Score	Start	End
Prudul26A017481P1	G_box2_bZIP	2.4306	-947	-942
Prudul26A017481P1	G_box2_bZIP	2.4306	-955	-950
Prudul26A017481P1	AuxRE_ARF	2.3153	-22	-17
Prudul26A017481P1	Myb_box5_MYB	1.6513	-117	-112
Prudul26A017481P1	Myb_box5_MYB	1.6513	-190	-185
Prudul26A017481P1	Myb_box5_MYB	1.6513	-834	-829
Prudul26A017481P1	Myb_box5_MYB	1.6513	-533	-528
Prudul26A017481P1	Myb_box2_MYB	2.3559	-75	-70
Prudul26A017481P1	C_ABRE_bZIP	3.305	-642	-637
Prudul26A017481P1	Myb_box1_MYB	1.7739	-533	-528
Gene	TF_Name	Z-Score	Start	End
Prudul26A017579P1	Myb_box5_MYB	1.9683	-275	-270
Prudul26A017579P1	N_box_bHLH	3.2846	-344	-339
Prudul26A017579P1	G_box2_bZIP	2.0347	-338	-333
Prudul26A017579P1	Myb_box2_MYB	2.6457	-959	-954
Prudul26A017579P1	Nac_box_NAC	2.6518	-286	-281
Gene	TF_Name	Z-Score	Start	End
Prudul26A017635P1	Myb_box5_MYB	2.3134	-68	-63
Prudul26A017635P1	Myb_box5_MYB	2.3134	-439	-434
Prudul26A017635P1	Myb_box5_MYB	2.3134	-66	-61
Prudul26A017635P1	Myb_box5_MYB	2.3134	-90	-85
Prudul26A017635P1	Myb_box5_MYB	2.3134	-19	-14
Prudul26A017635P1	HBE_HB	2.391	-973	-965
Prudul26A017635P1	Nac_box_NAC	3.0478	-875	-870
Prudul26A017635P1	W_box_WRKY	1.6148	-298	-293
Prudul26A017635P1	W_box_WRKY	1.6148	-485	-480
Prudul26A017635P1	Myb_box1_MYB	2.4116	-66	-61
Gene	TF_Name	Z-Score	Start	End
Prudul26A017845P2	C_ABRE_bZIP	3.9454	-877	-872
Prudul26A017845P2	G_box2_bZIP	2.9143	-699	-694
Prudul26A017845P2	G_box2_bZIP	2.9143	-874	-869
Prudul26A017845P2	Myb_box1_MYB	2.2567	-18	-13
Prudul26A017845P2	HSE1_HSF	1.6628	-167	-160
Prudul26A017845P2	AuxRE_ARF	2.7385	-43	-38
Prudul26A017845P2	Myb_box5_MYB	2.2076	-18	-13
Prudul26A017845P2	Myb_box5_MYB	2.2076	-462	-457
Prudul26A017845P2	Myb_box5_MYB	2.2076	-990	-985
Gene	TF_Name	Z-Score	Start	End
Prudul26A017899P1	Myb_box5_MYB	2.657	-485	-480
Prudul26A017899P1	Nac_box_NAC	2.7446	-853	-848
Prudul26A017899P1	Myb_box4_MYB	2.4333	-19	-13
Prudul26A017899P1	Myb_box2_MYB	2.5215	-248	-243
Prudul26A017899P1	Myb_box2_MYB	2.5215	-114	-109
Prudul26A017899P1	Myb_box2_MYB	2.5215	-69	-64
Prudul26A017899P1	N_box_bHLH	3.1993	-287	-282
Prudul26A017899P1	Myb_box1_MYB	2.7824	-485	-480
Prudul26A017899P1	C_ABRE_bZIP	3.7426	-79	-74
Prudul26A017899P1	Myb_box3_MYB	2.0933	-912	-907
Gene	TF_Name	Z-Score	Start	End
Prudul26A017933P1	G_box2_bZIP	2.1903	-679	-674
Prudul26A017933P1	N_box_bHLH	2.8198	-634	-629
Prudul26A017933P1	AuxRE_ARF	2.8027	-949	-944
Prudul26A017933P1	Myb_box3_MYB	2.1918	-914	-909
Prudul26A017933P1	Myb_box5_MYB	2.9161	-764	-759
Prudul26A017933P1	DREB_AP2_EREBP	2.8092	-89	-84
Prudul26A017933P1	DREB_AP2_EREBP	2.8092	-762	-757
Gene	TF_Name	Z-Score	Start	End
Prudul26A018234P1	Myb_box1_MYB	2.0114	-680	-675
Prudul26A018234P1	Myb_box1_MYB	2.0114	-227	-222
Prudul26A018234P1	Myb_box5_MYB	2.6425	-989	-984
Prudul26A018234P1	G_box2_bZIP	2.033	-377	-372
Prudul26A018234P1	N_box_bHLH	3.2347	-416	-411
Prudul26A018234P1	G_box_bHLH	3.2164	-757	-752
Prudul26A018234P1	AuxRE_ARF	2.6856	-852	-847
Prudul26A018234P1	G_box1_bZIP	3.8322	-758	-751
Prudul26A018234P1	C_ABRE_bZIP	3.7367	-512	-507
Gene	TF_Name	Z-Score	Start	End
Prudul26A018287P1	Myb_box3_MYB	2.2053	-389	-384
Prudul26A018287P1	Myb_box5_MYB	2.0471	-93	-88
Prudul26A018287P1	W_box_WRKY	2.2884	-955	-950
Prudul26A018287P1	G_box_bHLH	3.3698	-509	-504
Prudul26A018287P1	Myb_box1_MYB	2.2076	-93	-88
Prudul26A018287P1	HBE_HB	1.5968	-756	-748
Gene	TF_Name	Z-Score	Start	End
Prudul26A018381P1	G_box2_bZIP	2.1577	-612	-607
Prudul26A018381P1	Myb_box1_MYB	2.1598	-769	-764
Prudul26A018381P1	Myb_box1_MYB	2.1598	-519	-514
Prudul26A018381P1	G_box_bHLH	3.3101	-349	-344
Prudul26A018381P1	HBE_HB	2.1122	-240	-232
Prudul26A018381P1	Myb_box5_MYB	2.0365	-769	-764
Prudul26A018381P1	Myb_box5_MYB	2.0365	-519	-514
Prudul26A018381P1	Myb_box2_MYB	2.7634	-36	-31
Prudul26A018381P1	Myb_box2_MYB	2.7634	-344	-339
Gene	TF_Name	Z-Score	Start	End
Prudul26A018453P1	Nac_box_NAC	2.5002	-796	-791
Prudul26A018453P1	Myb_box5_MYB	1.7132	-791	-786
Prudul26A018453P1	Myb_box5_MYB	1.7132	-484	-479
Prudul26A018453P1	Myb_box5_MYB	1.7132	-403	-398
Prudul26A018453P1	Myb_box5_MYB	1.7132	-655	-650
Prudul26A018453P1	W_box_WRKY	1.9131	-658	-653
Prudul26A018453P1	Myb_box4_MYB	2.2096	-879	-873
Prudul26A018453P1	Myb_box4_MYB	2.2096	-634	-628
Prudul26A018453P1	Myb_box4_MYB	2.2096	-952	-946
Prudul26A018453P1	Myb_box4_MYB	2.2096	-900	-894
Prudul26A018453P1	Myb_box3_MYB	1.8684	-698	-693
Prudul26A018453P1	DREB_AP2_EREBP	3.0036	-647	-642
Prudul26A018453P1	Myb_box1_MYB	1.8535	-484	-479
Prudul26A018453P1	N_box_bHLH	2.3554	-160	-155
Prudul26A018453P1	AuxRE_ARF	2.4682	-585	-580
Gene	TF_Name	Z-Score	Start	End
Prudul26A018453P1	Nac_box_NAC	2.5002	-796	-791
Prudul26A018453P1	Myb_box5_MYB	1.7132	-791	-786
Prudul26A018453P1	Myb_box5_MYB	1.7132	-484	-479
Prudul26A018453P1	Myb_box5_MYB	1.7132	-403	-398
Prudul26A018453P1	Myb_box5_MYB	1.7132	-655	-650
Prudul26A018453P1	W_box_WRKY	1.9131	-658	-653
Prudul26A018453P1	Myb_box4_MYB	2.2096	-879	-873
Prudul26A018453P1	Myb_box4_MYB	2.2096	-634	-628
Prudul26A018453P1	Myb_box4_MYB	2.2096	-952	-946
Prudul26A018453P1	Myb_box4_MYB	2.2096	-900	-894
Prudul26A018453P1	Myb_box3_MYB	1.8684	-698	-693
Prudul26A018453P1	DREB_AP2_EREBP	3.0036	-647	-642
Prudul26A018453P1	Myb_box1_MYB	1.8535	-484	-479
Prudul26A018453P1	N_box_bHLH	2.3554	-160	-155
Prudul26A018453P1	AuxRE_ARF	2.4682	-585	-580
Gene	TF_Name	Z-Score	Start	End
Prudul26A018462P1	AuxRE_ARF	2.696	-740	-735
Prudul26A018462P1	Nac_box_NAC	2.7222	-513	-508
Prudul26A018462P1	Myb_box3_MYB	2.08	-773	-768
Prudul26A018462P1	Myb_box2_MYB	2.6495	-152	-147
Prudul26A018462P1	Myb_box5_MYB	1.9306	-161	-156
Prudul26A018462P1	Myb_box5_MYB	1.9306	-423	-418
Prudul26A018462P1	Myb_box5_MYB	1.9306	-254	-249
Gene	TF_Name	Z-Score	Start	End
Prudul26A018637P1	N_box_bHLH	3.7747	-340	-335
Prudul26A018637P1	N_box_bHLH	3.7747	-338	-333
Prudul26A018637P1	Myb_box5_MYB	2.3073	-7	-2
Prudul26A018637P1	Myb_box5_MYB	2.3073	-246	-241
Prudul26A018637P1	Myb_box5_MYB	2.3073	-244	-239
Prudul26A018637P1	Myb_box5_MYB	2.3073	-356	-351
Prudul26A018637P1	Myb_box2_MYB	3.1887	-255	-250
Prudul26A018637P1	W_box_WRKY	2.4475	-316	-311
Prudul26A018637P1	Myb_box1_MYB	2.4112	-246	-241
Gene	TF_Name	Z-Score	Start	End
Prudul26A018800P1	N_box_bHLH	3.1608	-187	-182
Prudul26A018800P1	N_box_bHLH	3.1608	-185	-180
Prudul26A018800P1	DREB_AP2_EREBP	2.5037	-426	-421
Prudul26A018800P1	Myb_box5_MYB	2.6137	-870	-865
Prudul26A018800P1	Myb_box1_MYB	1.9156	-868	-863
Prudul26A018800P1	G_box2_bZIP	1.9325	-146	-141
Gene	TF_Name	Z-Score	Start	End
Prudul26A019007P1	G_ABRE_bZIP	3.3291	-192	-185
Prudul26A019007P1	Myb_box5_MYB	2.5266	-491	-486
Prudul26A019007P1	Myb_box5_MYB	2.5266	-122	-117
Prudul26A019007P1	Myb_box4_MYB	2.3729	-641	-635
Prudul26A019007P1	C_ABRE_bZIP	3.5132	-674	-669
Prudul26A019007P1	GCC_box_AP2_EREBP	3.9119	-316	-311
Prudul26A019007P1	G_box_bHLH	3.0396	-192	-187
Prudul26A019007P1	N_box_bHLH	2.4078	-835	-830
Gene	TF_Name	Z-Score	Start	End
Prudul26A019007P1	Nac_box_NAC	2.6026	-888	-883
Prudul26A019007P1	N_box_bHLH	3.2193	-273	-268
Gene	TF_Name	Z-Score	Start	End
Prudul26A019680P1	DREB_AP2_EREBP	2.3254	-759	-754
Prudul26A019680P1	Myb_box1_MYB	1.7978	-99	-94
Prudul26A019680P1	N_box_bHLH	2.9272	-449	-444
Prudul26A019680P1	Nac_box_NAC	2.3948	-575	-570
Prudul26A019680P1	AuxRE_ARF	2.2342	-206	-201
Prudul26A019680P1	G_box_bHLH	2.8931	-583	-578
Prudul26A019680P1	Myb_box3_MYB	1.7857	-463	-458
Prudul26A019680P1	Myb_box5_MYB	1.6641	-512	-507
Prudul26A019680P1	Myb_box5_MYB	1.6641	-671	-666
Prudul26A019680P1	Myb_box5_MYB	1.6641	-821	-816
Prudul26A019680P1	Myb_box5_MYB	1.6641	-99	-94
Prudul26A019680P1	Myb_box5_MYB	1.6641	-723	-718
Prudul26A019680P1	W_box_WRKY	1.8142	-622	-617
Prudul26A019680P1	Myb_box2_MYB	2.2719	-161	-156
Prudul26A019680P1	Myb_box2_MYB	2.2719	-722	-717
Prudul26A019680P1	Myb_box4_MYB	2.1958	-993	-987
Gene	TF_Name	Z-Score	Start	End
Prudul26A019965P1	Myb_box3_MYB	2.0485	-115	-110
Prudul26A019965P1	Myb_box3_MYB	2.0485	-207	-202
Prudul26A019965P1	G_box_bHLH	3.1538	-707	-702
Prudul26A019965P1	GCC_box_AP2_EREBP	4.1176	-280	-275
Prudul26A019965P1	Myb_box2_MYB	2.8001	-560	-555
Prudul26A019965P1	Myb_box5_MYB	1.9554	-350	-345
Prudul26A019965P1	Myb_box5_MYB	1.9554	-198	-193
Prudul26A019965P1	Myb_box1_MYB	2.0531	-198	-193
Gene	TF_Name	Z-Score	Start	End
Prudul26A020065P1	Myb_box4_MYB	2.6401	-155	-149
Prudul26A020065P1	Myb_box1_MYB	2.0166	-303	-298
Prudul26A020065P1	Nac_box_NAC	2.6426	-342	-337
Prudul26A020065P1	Myb_box3_MYB	2.012	-267	-262
Prudul26A020065P1	DREB_AP2_EREBP	2.6179	-258	-253
Prudul26A020065P1	Myb_box5_MYB	1.9067	-303	-298
Prudul26A020065P1	Myb_box5_MYB	1.9067	-164	-159
Prudul26A020065P1	Myb_box5_MYB	1.9067	-838	-833
Prudul26A020065P1	G_box_bHLH	3.2279	-273	-268
Prudul26A020065P1	G_box_bHLH	3.2279	-537	-532
Prudul26A020065P1	G_box1_bZIP	4.0477	-538	-531
Gene	TF_Name	Z-Score	Start	End
Prudul26A020107P1	Myb_box3_MYB	2.3186	-948	-943
Prudul26A020107P1	Myb_box5_MYB	2.3062	-568	-563
Prudul26A020107P1	Myb_box5_MYB	2.3062	-325	-320
Prudul26A020107P1	AuxRE_ARF	2.8452	-986	-981
Prudul26A020107P1	AuxRE_ARF	2.8452	-981	-976
Prudul26A020107P1	W_box_WRKY	1.5784	-968	-963
Prudul26A020107P1	W_box_WRKY	1.5784	-871	-866
Prudul26A020107P1	Myb_box1_MYB	2.373	-325	-320
Prudul26A020107P1	G_box_bHLH	3.6074	-82	-77
Prudul26A020107P1	Nac_box_NAC	2.9602	-141	-136
Prudul26A020107P1	Nac_box_NAC	2.9602	-98	-93
Gene	TF_Name	Z-Score	Start	End
Prudul26A020144P1	Myb_box5_MYB	2.215	-861	-856
Prudul26A020144P1	Myb_box5_MYB	2.215	-364	-359
Prudul26A020144P1	Myb_box5_MYB	2.215	-750	-745
Prudul26A020144P1	Myb_box5_MYB	2.215	-845	-840
Prudul26A020144P1	Myb_box4_MYB	3.0105	-838	-832
Prudul26A020144P1	AuxRE_ARF	3.0141	-583	-578
Gene	TF_Name	Z-Score	Start	End
Prudul26A020209P1	Myb_box1_MYB	1.6043	-672	-667
Prudul26A020209P1	W_box_WRKY	1.6743	-473	-468
Prudul26A020209P1	Myb_box5_MYB	1.5367	-672	-667
Prudul26A020209P1	Myb_box5_MYB	1.5367	-315	-310
Prudul26A020209P1	HSE1_HSF	1.8365	-568	-561
Prudul26A020209P1	Myb_box3_MYB	2.3414	-672	-667
Gene	TF_Name	Z-Score	Start	End
Prudul26A021034P1	N_box_bHLH	3.0839	-606	-601
Prudul26A021034P1	DREB_AP2_EREBP	3.0529	-321	-316
Prudul26A021034P1	Myb_box5_MYB	2.5329	-790	-785
Prudul26A021034P1	Myb_box5_MYB	2.5329	-745	-740
Prudul26A021034P1	AuxRE_ARF	2.6104	-263	-258
Prudul26A021034P1	GCC_box_AP2_EREBP	3.9138	-677	-672
Prudul26A021034P1	GCC_box_AP2_EREBP	3.9138	-323	-318
Prudul26A021034P1	GCC_box_AP2_EREBP	3.9138	-676	-671
Gene	TF_Name	Z-Score	Start	End
Prudul26A021325P1	HSE1_HSF	1.5908	-398	-391
Prudul26A021325P1	Myb_box1_MYB	2.1513	-11	-6
Prudul26A021325P1	Myb_box1_MYB	2.1513	-311	-306
Prudul26A021325P1	Myb_box1_MYB	2.1513	-865	-860
Prudul26A021325P1	DREB_AP2_EREBP	3.4047	-715	-710
Prudul26A021325P1	Nac_box_NAC	2.7213	-419	-414
Prudul26A021325P1	Nac_box_NAC	2.7213	-381	-376
Prudul26A021325P1	G_box_bHLH	3.2987	-562	-557
Prudul26A021325P1	AuxRE_ARF	2.7657	-491	-486
Prudul26A021325P1	AuxRE_ARF	2.7657	-412	-407
Prudul26A021325P1	Myb_box5_MYB	2.0786	-183	-178
Prudul26A021325P1	Myb_box5_MYB	2.0786	-185	-180
Prudul26A021325P1	Myb_box5_MYB	2.0786	-667	-662
Prudul26A021325P1	Myb_box5_MYB	2.0786	-311	-306
Prudul26A021325P1	Myb_box5_MYB	2.0786	-11	-6
Prudul26A021325P1	Myb_box5_MYB	2.0786	-865	-860
Prudul26A021325P1	Myb_box5_MYB	2.0786	-876	-871
Prudul26A021325P1	Myb_box5_MYB	2.0786	-98	-93
Prudul26A021325P1	Myb_box3_MYB	2.131	-781	-776
Gene	TF_Name	Z-Score	Start	End
Prudul26A021437P1	G_box2_bZIP	2.3346	-507	-502
Prudul26A021437P1	Myb_box1_MYB	1.6154	-511	-506
Prudul26A021437P1	Myb_box3_MYB	2.3357	-511	-506
Prudul26A021437P1	Myb_box2_MYB	3.1004	-522	-517
Prudul26A021437P1	Myb_box5_MYB	3.0288	-523	-518
Gene	TF_Name	Z-Score	Start	End
Prudul26A021471P1	Myb_box5_MYB	2.8703	-670	-665
Prudul26A021471P1	G_box_bHLH	3.349	-801	-796
Prudul26A021471P1	Myb_box1_MYB	2.8817	-670	-665
Prudul26A021471P1	W_box_WRKY	2.1978	-649	-644
Prudul26A021471P1	N_box_bHLH	3.4916	-88	-83
Prudul26A021471P1	AuxRE_ARF	2.7383	-285	-280
Prudul26A021471P1	Myb_box3_MYB	2.1162	-950	-945
Gene	TF_Name	Z-Score	Start	End
Prudul26A021534P1	Nac_box_NAC	2.3587	-766	-761
Prudul26A021534P1	Nac_box_NAC	2.3587	-45	-40
Prudul26A021534P1	Nac_box_NAC	2.3587	-673	-668
Prudul26A021534P1	Myb_box1_MYB	2.4518	-405	-400
Prudul26A021534P1	Myb_box4_MYB	2.2811	-848	-842
Prudul26A021534P1	Myb_box5_MYB	2.4065	-405	-400
Prudul26A021534P1	C_ABRE_bZIP	3.2853	-42	-37
Gene	TF_Name	Z-Score	Start	End
Prudul26A021606P1	Myb_box1_MYB	2.0537	-904	-899
Prudul26A021606P1	Myb_box5_MYB	2.6358	-149	-144
Prudul26A021606P1	Myb_box5_MYB	2.6358	-412	-407
Prudul26A021606P1	DREB_AP2_EREBP	3.1514	-830	-825
Prudul26A021606P1	Myb_box3_MYB	2.0427	-596	-591
Prudul26A021606P1	G_box_bHLH	3.1822	-461	-456
Gene	TF_Name	Z-Score	Start	End
Prudul26A021707P1	Myb_box1_MYB	1.5747	-496	-491
Prudul26A021707P1	Nac_box_NAC	2.8908	-197	-192
Prudul26A021707P1	DREB_AP2_EREBP	3.5294	-623	-618
Prudul26A021707P1	Myb_box3_MYB	2.3057	-496	-491
Prudul26A021707P1	Myb_box5_MYB	2.1857	-748	-743
Prudul26A021707P1	Myb_box5_MYB	2.1857	-146	-141
Prudul26A021707P1	Myb_box5_MYB	2.1857	-746	-741
Prudul26A021707P1	GCC_box_AP2_EREBP	4.5305	-621	-616
Gene	TF_Name	Z-Score	Start	End
Prudul26A021999P1	Myb_box3_MYB	2.2203	-218	-213
Prudul26A021999P1	G_box2_bZIP	2.2499	-435	-430
Prudul26A021999P1	Myb_box2_MYB	2.9216	-810	-805
Prudul26A021999P1	Myb_box5_MYB	2.1126	-235	-230
Prudul26A021999P1	Myb_box5_MYB	2.1126	-285	-280
Gene	TF_Name	Z-Score	Start	End
Prudul26A022009P1	W_box_WRKY	2.185	-729	-724
Prudul26A022009P1	Myb_box5_MYB	2.0624	-502	-497
Prudul26A022009P1	Myb_box5_MYB	2.0624	-518	-513
Prudul26A022009P1	Myb_box1_MYB	2.1782	-502	-497
Prudul26A022009P1	GCC_box_AP2_EREBP	4.0568	-208	-203
Prudul26A022009P1	Myb_box3_MYB	2.141	-357	-352
Gene	TF_Name	Z-Score	Start	End
Prudul26A022115P1	HSE1_HSF	1.8373	-541	-534
Prudul26A022115P1	HSE1_HSF	1.8373	-113	-106
Prudul26A022115P1	Myb_box5_MYB	2.3289	-876	-871
Prudul26A022115P1	Myb_box5_MYB	2.3289	-735	-730
Prudul26A022115P1	Myb_box5_MYB	2.3289	-729	-724
Prudul26A022115P1	Nac_box_NAC	3.0546	-899	-894
Prudul26A022115P1	W_box_WRKY	2.4193	-373	-368
Prudul26A022115P1	W_box_WRKY	2.4193	-430	-425
Prudul26A022115P1	AuxRE_ARF	3.0012	-858	-853
Prudul26A022115P1	Myb_box1_MYB	2.4236	-729	-724
Gene	TF_Name	Z-Score	Start	End
Prudul26A022450P1	HBE_HB	1.7497	-78	-70
Prudul26A022450P1	Myb_box1_MYB	2.3925	-413	-408
Prudul26A022450P1	Myb_box1_MYB	2.3925	-184	-179
Prudul26A022450P1	W_box_WRKY	2.4965	-238	-233
Prudul26A022450P1	Myb_box3_MYB	2.3606	-224	-219
Prudul26A022450P1	Myb_box3_MYB	2.3606	-963	-958
Prudul26A022450P1	Myb_box5_MYB	2.2659	-772	-767
Prudul26A022450P1	Myb_box5_MYB	2.2659	-413	-408
Prudul26A022450P1	Myb_box5_MYB	2.2659	-184	-179
Gene	TF_Name	Z-Score	Start	End
Prudul26A022504P1	Myb_box5_MYB	1.6829	-621	-616
Prudul26A022504P1	Myb_box1_MYB	1.8287	-621	-616
Prudul26A022504P1	DREB_AP2_EREBP	2.298	-269	-264
Prudul26A022504P1	N_box_bHLH	2.3022	-999	-994
Prudul26A022504P1	W_box_WRKY	1.8921	-810	-805
Prudul26A022504P1	G_box_bHLH	2.9042	-916	-911
Prudul26A022504P1	GCC_box_AP2_EREBP	3.6494	-868	-863
Prudul26A022504P1	GCC_box_AP2_EREBP	3.6494	-869	-864
Prudul26A022504P1	Myb_box2_MYB	2.3032	-37	-32
Gene	TF_Name	Z-Score	Start	End
Prudul26A022582P1	GCC_box_AP2_EREBP	4.4465	-298	-293
Prudul26A022582P1	AuxRE_ARF	2.8547	-646	-641
Prudul26A022582P1	Myb_box5_MYB	2.9017	-295	-290
Prudul26A022582P1	Myb_box3_MYB	2.1941	-894	-889
Prudul26A022582P1	Myb_box3_MYB	2.1941	-484	-479
Gene	TF_Name	Z-Score	Start	End
Prudul26A022695P1	Myb_box1_MYB	1.5538	-321	-316
Prudul26A022695P1	Myb_box2_MYB	2.9274	-294	-289
Prudul26A022695P1	W_box_WRKY	2.3778	-192	-187
Prudul26A022695P1	W_box_WRKY	2.3778	-155	-150
Prudul26A022695P1	W_box_WRKY	2.3778	-200	-195
Prudul26A022695P1	Nac_box_NAC	2.9786	-728	-723
Prudul26A022695P1	G_box2_bZIP	3.0586	-16	-11
Prudul26A022695P1	G_box_bHLH	3.5145	-746	-741
Prudul26A022695P1	G_box_bHLH	3.5145	-343	-338
Prudul26A022695P1	Myb_box5_MYB	1.9228	-487	-482
Prudul26A022695P1	Myb_box5_MYB	1.9228	-962	-957
Prudul26A022695P1	Myb_box5_MYB	1.9228	-112	-107
Prudul26A022695P1	Myb_box3_MYB	2.2824	-321	-316
Gene	TF_Name	Z-Score	Start	End
Prudul26A022764P1	Myb_box4_MYB	2.6406	-863	-857
Prudul26A022764P1	G_box2_bZIP	2.9101	-213	-208
Prudul26A022764P1	Myb_box5_MYB	2.8589	-415	-410
Prudul26A022764P1	Myb_box3_MYB	2.1251	-887	-882
Prudul26A022764P1	HSE1_HSF	1.5701	-593	-586
Prudul26A022764P1	Myb_box2_MYB	2.6953	-943	-938
Prudul26A022764P1	Myb_box2_MYB	2.6953	-867	-862
Gene	TF_Name	Z-Score	Start	End
Prudul26A022831P1	Myb_box3_MYB	2.2841	-378	-373
Prudul26A022831P1	Myb_box3_MYB	2.2841	-394	-389
Prudul26A022831P1	AuxRE_ARF	2.8227	-204	-199
Prudul26A022831P1	Myb_box1_MYB	1.5781	-378	-373
Prudul26A022831P1	Myb_box1_MYB	1.5781	-394	-389
Prudul26A022831P1	W_box_WRKY	1.5553	-190	-185
Prudul26A022831P1	W_box_WRKY	1.5553	-22	-17
Prudul26A022831P1	HBE_HB	1.6495	-330	-322
Gene	TF_Name	Z-Score	Start	End
Prudul26A022870P1	AuxRE_ARF	2.7306	-797	-792
Prudul26A022870P1	Myb_box3_MYB	2.2083	-488	-483
Prudul26A022870P1	DREB_AP2_EREBP	2.8587	-32	-27
Prudul26A022870P1	N_box_bHLH	3.5714	-160	-155
Prudul26A022870P1	Nac_box_NAC	2.8278	-992	-987
Prudul26A022870P1	Myb_box1_MYB	1.5051	-488	-483
Prudul26A022870P1	Myb_box5_MYB	2.983	-436	-431
Prudul26A022870P1	G_box1_bZIP	4.1766	-866	-859
Prudul26A022870P1	G_box_bHLH	3.4109	-167	-162
Prudul26A022870P1	G_box_bHLH	3.4109	-157	-152
Prudul26A022870P1	G_box_bHLH	3.4109	-865	-860
Gene	TF_Name	Z-Score	Start	End
Prudul26A023159P1	Myb_box1_MYB	2.2217	-390	-385
Prudul26A023159P1	Myb_box1_MYB	2.2217	-487	-482
Prudul26A023159P1	W_box_WRKY	2.2973	-172	-167
Prudul26A023159P1	Myb_box5_MYB	2.1361	-390	-385
Prudul26A023159P1	Myb_box5_MYB	2.1361	-487	-482
Prudul26A023159P1	Nac_box_NAC	2.7963	-294	-289
Gene	TF_Name	Z-Score	Start	End
Prudul26A023167P1	Myb_box2_MYB	3.3413	-876	-871
Prudul26A023167P1	Myb_box5_MYB	2.2187	-131	-126
Prudul26A023167P1	Myb_box5_MYB	2.2187	-100	-95
Prudul26A023167P1	Myb_box5_MYB	2.2187	-205	-200
Prudul26A023167P1	Myb_box5_MYB	2.2187	-13	-8
Prudul26A023167P1	Myb_box5_MYB	2.2187	-236	-231
Prudul26A023167P1	Myb_box5_MYB	2.2187	-58	-53
Prudul26A023167P1	Myb_box5_MYB	2.2187	-169	-164
Prudul26A023167P1	Myb_box1_MYB	2.3813	-131	-126
Prudul26A023167P1	Myb_box1_MYB	2.3813	-100	-95
Prudul26A023167P1	Myb_box1_MYB	2.3813	-205	-200
Prudul26A023167P1	Myb_box1_MYB	2.3813	-58	-53
Prudul26A023167P1	Myb_box1_MYB	2.3813	-169	-164
Gene	TF_Name	Z-Score	Start	End
Prudul26A023194P1	N_box_bHLH	2.1539	-115	-110
Prudul26A023194P1	Myb_box2_MYB	2.1554	-383	-378
Prudul26A023194P1	G_box2_bZIP	1.6316	-137	-132
Prudul26A023194P1	W_box_WRKY	1.6949	-297	-292
Prudul26A023194P1	Myb_box1_MYB	1.6368	-234	-229
Prudul26A023194P1	Myb_box5_MYB	2.2775	-371	-366
Prudul26A023194P1	Myb_box5_MYB	2.2775	-461	-456
Prudul26A023194P1	Myb_box4_MYB	2.0618	-388	-382
Gene	TF_Name	Z-Score	Start	End
Prudul26A023888P1	Myb_box5_MYB	2.0965	-117	-112
Prudul26A023888P1	Myb_box5_MYB	2.0965	-97	-92
Prudul26A023888P1	Myb_box5_MYB	2.0965	-803	-798
Prudul26A023888P1	Myb_box5_MYB	2.0965	-95	-90
Prudul26A023888P1	HSE1_HSF	1.6422	-66	-59
Prudul26A023888P1	Myb_box1_MYB	2.2019	-803	-798
Prudul26A023888P1	Myb_box1_MYB	2.2019	-95	-90
Gene	TF_Name	Z-Score	Start	End
Prudul26A024325P1	W_box_WRKY	1.6287	-232	-227
Prudul26A024325P1	W_box_WRKY	1.6287	-338	-333
Prudul26A024325P1	Myb_box5_MYB	2.1971	-293	-288
Prudul26A024325P1	Myb_box1_MYB	1.5568	-254	-249
Prudul26A024325P1	G_box2_bZIP	2.3547	-768	-763
Prudul26A024325P1	DREB_AP2_EREBP	3.6157	-259	-254
Prudul26A024325P1	Myb_box3_MYB	2.31	-254	-249
Gene	TF_Name	Z-Score	Start	End
Prudul26A024381P2	Myb_box5_MYB	2.0585	-171	-166
Prudul26A024381P2	Myb_box5_MYB	2.0585	-639	-634
Prudul26A024381P2	Myb_box5_MYB	2.0585	-85	-80
Prudul26A024381P2	Myb_box5_MYB	2.0585	-252	-247
Prudul26A024381P2	W_box_WRKY	2.2011	-119	-114
Prudul26A024381P2	HSE1_HSF	1.6462	-464	-457
Prudul26A024381P2	GCC_box_AP2_EREBP	4.0575	-733	-728
Prudul26A024381P2	Myb_box1_MYB	2.2045	-171	-166
Prudul26A024381P2	Myb_box3_MYB	2.1843	-676	-671
Prudul26A024381P2	Myb_box2_MYB	2.6673	-86	-81
Prudul26A024381P2	Myb_box4_MYB	2.5947	-229	-223
Gene	TF_Name	Z-Score	Start	End
Prudul26A024443P1	N_box_bHLH	2.2037	-138	-133
Prudul26A024443P1	N_box_bHLH	2.2037	-226	-221
Prudul26A024443P1	Myb_box4_MYB	2.2328	-67	-61
Prudul26A024443P1	Myb_box5_MYB	1.5564	-118	-113
Prudul26A024443P1	Myb_box5_MYB	1.5564	-816	-811
Prudul26A024443P1	Myb_box5_MYB	1.5564	-68	-63
Prudul26A024443P1	Myb_box5_MYB	1.5564	-843	-838
Prudul26A024443P1	Myb_box5_MYB	1.5564	-319	-314
Prudul26A024443P1	Myb_box1_MYB	1.6988	-118	-113
Prudul26A024443P1	Myb_box1_MYB	1.6988	-843	-838
Prudul26A024443P1	W_box_WRKY	1.8167	-608	-603
Prudul26A024443P1	W_box_WRKY	1.8167	-612	-607
Prudul26A024443P1	Myb_box3_MYB	1.7262	-767	-762
Prudul26A024443P1	Myb_box3_MYB	1.7262	-664	-659
Prudul26A024443P1	Myb_box2_MYB	2.3149	-112	-107
Gene	TF_Name	Z-Score	Start	End
Prudul26A024708P1	Myb_box1_MYB	2.8916	-636	-631
Prudul26A024708P1	Nac_box_NAC	2.7782	-742	-737
Prudul26A024708P1	Myb_box5_MYB	2.8405	-636	-631
Prudul26A024708P1	DREB_AP2_EREBP	3.3685	-150	-145
Gene	TF_Name	Z-Score	Start	End
Prudul26A025250P1	N_box_bHLH	2.5948	-106	-101
Prudul26A025250P1	G_box_bHLH	3.2654	-136	-131
Prudul26A025250P1	Myb_box5_MYB	1.9298	-929	-924
Prudul26A025250P1	Myb_box5_MYB	1.9298	-931	-926
Prudul26A025250P1	Myb_box5_MYB	1.9298	-673	-668
Prudul26A025250P1	HSE1_HSF	1.5519	-155	-148
Prudul26A025250P1	HSE1_HSF	1.5519	-150	-143
Gene	TF_Name	Z-Score	Start	End
Prudul26A025321P1	Myb_box4_MYB	2.8056	-327	-321
Prudul26A025321P1	DREB_AP2_EREBP	2.7479	-490	-485
Prudul26A025321P1	N_box_bHLH	2.7453	-894	-889
Prudul26A025321P1	N_box_bHLH	2.7453	-434	-429
Prudul26A025321P1	W_box_WRKY	1.5019	-538	-533
Prudul26A025321P1	W_box_WRKY	1.5019	-45	-40
Prudul26A025321P1	G_box2_bZIP	2.8877	-715	-710
Prudul26A025321P1	G_box_bHLH	3.3379	-159	-154
Prudul26A025321P1	Myb_box5_MYB	2.0643	-748	-743
Gene	TF_Name	Z-Score	Start	End
Prudul26A025331P1	Myb_box5_MYB	1.9055	-952	-947
Prudul26A025331P1	Myb_box5_MYB	1.9055	-263	-258
Prudul26A025331P1	Myb_box5_MYB	1.9055	-250	-245
Prudul26A025331P1	Myb_box5_MYB	1.9055	-776	-771
Prudul26A025331P1	Myb_box5_MYB	1.9055	-265	-260
Prudul26A025331P1	Myb_box5_MYB	1.9055	-778	-773
Prudul26A025331P1	Nac_box_NAC	2.6037	-889	-884
Prudul26A025331P1	Myb_box2_MYB	2.7381	-777	-772
Prudul26A025331P1	N_box_bHLH	2.5907	-184	-179
Gene	TF_Name	Z-Score	Start	End
Prudul26A025360P1	G_ABRE_bZIP	3.6857	-81	-74
Prudul26A025360P1	Myb_box5_MYB	1.9006	-232	-227
Prudul26A025360P1	Myb_box5_MYB	1.9006	-98	-93
Prudul26A025360P1	Myb_box5_MYB	1.9006	-661	-656
Prudul26A025360P1	AuxRE_ARF	2.6749	-57	-52
Prudul26A025360P1	G_box_bHLH	3.3153	-81	-76
Prudul26A025360P1	Nac_box_NAC	2.8259	-958	-953
Gene	TF_Name	Z-Score	Start	End
Prudul26A025379P1	G_box_bHLH	2.9719	-420	-415
Prudul26A025379P1	G_box_bHLH	2.9719	-957	-952
Prudul26A025379P1	AuxRE_ARF	2.3867	-340	-335
Prudul26A025379P1	AuxRE_ARF	2.3867	-628	-623
Prudul26A025379P1	N_box_bHLH	3.0953	-545	-540
Prudul26A025379P1	Nac_box_NAC	2.3734	-581	-576
Prudul26A025379P1	Myb_box3_MYB	1.8216	-414	-409
Prudul26A025379P1	Myb_box4_MYB	2.4801	-126	-120
Gene	TF_Name	Z-Score	Start	End
Prudul26A025464P1	Myb_box3_MYB	2.1444	-882	-877
Prudul26A025464P1	GCC_box_AP2_EREBP	4.4077	-406	-401
Prudul26A025464P1	GCC_box_AP2_EREBP	4.4077	-587	-582
Prudul26A025464P1	GCC_box_AP2_EREBP	4.4077	-407	-402
Prudul26A025464P1	W_box_WRKY	2.2835	-543	-538
Prudul26A025464P1	AuxRE_ARF	2.8455	-529	-524
Prudul26A025464P1	Myb_box5_MYB	2.8168	-11	-6
Prudul26A025464P1	Myb_box1_MYB	2.1421	-401	-396
Prudul26A025464P1	Myb_box1_MYB	2.1421	-461	-456
Prudul26A025464P1	Nac_box_NAC	2.8306	-866	-861
Gene	TF_Name	Z-Score	Start	End
Prudul26A025694P1	G_box2_bZIP	2.7294	-786	-781
Prudul26A025694P1	DREB_AP2_EREBP	3.2484	-955	-950
Prudul26A025694P1	Myb_box3_MYB	2.0368	-648	-643
Prudul26A025694P1	Myb_box5_MYB	1.9143	-510	-505
Prudul26A025694P1	Myb_box5_MYB	1.9143	-540	-535
Prudul26A025694P1	Myb_box5_MYB	1.9143	-538	-533
Prudul26A025694P1	AuxRE_ARF	2.4892	-158	-153
Prudul26A025694P1	AuxRE_ARF	2.4892	-372	-367
Prudul26A025694P1	AuxRE_ARF	2.4892	-375	-370
Prudul26A025694P1	Myb_box2_MYB	2.5129	-509	-504
Gene	TF_Name	Z-Score	Start	End
Prudul26A025832P1	G_box2_bZIP	2.3927	-539	-534
Prudul26A025832P1	DREB_AP2_EREBP	2.2837	-422	-417
Prudul26A025832P1	Myb_box3_MYB	1.7348	-729	-724
Prudul26A025832P1	Nac_box_NAC	2.2438	-756	-751
Prudul26A025832P1	Nac_box_NAC	2.2438	-808	-803
Prudul26A025832P1	AuxRE_ARF	2.3066	-919	-914
Prudul26A025832P1	AuxRE_ARF	2.3066	-924	-919
Prudul26A025832P1	G_box_bHLH	2.8159	-273	-268
Prudul26A025832P1	Myb_box2_MYB	2.4985	-39	-34
Prudul26A025832P1	Myb_box2_MYB	2.4985	-491	-486
Prudul26A025832P1	Myb_box5_MYB	1.6464	-74	-69
Prudul26A025832P1	Myb_box5_MYB	1.6464	-1000	-995
Prudul26A025832P1	Myb_box5_MYB	1.6464	-492	-487
Prudul26A025832P1	Myb_box5_MYB	1.6464	-40	-35
Gene	TF_Name	Z-Score	Start	End
Prudul26A026679P1	G_box2_bZIP	2.4146	-164	-159
Prudul26A026679P1	G_box2_bZIP	2.4146	-779	-774
Prudul26A026679P1	G_ABRE_bZIP	2.5785	-236	-229
Prudul26A026679P1	N_box_bHLH	2.8731	-48	-43
Prudul26A026679P1	Myb_box4_MYB	2.2184	-86	-80
Prudul26A026679P1	DREB_AP2_EREBP	2.8445	-147	-142
Prudul26A026679P1	Myb_box5_MYB	2.3672	-67	-62
Prudul26A026679P1	Myb_box2_MYB	2.3233	-56	-51
Gene	TF_Name	Z-Score	Start	End
Prudul26A026779P1	Myb_box2_MYB	2.888	-616	-611
Prudul26A026779P1	Myb_box3_MYB	2.1761	-307	-302
Prudul26A026779P1	Myb_box3_MYB	2.1761	-149	-144
Prudul26A026779P1	Myb_box5_MYB	2.0979	-531	-526
Prudul26A026779P1	Myb_box5_MYB	2.0979	-561	-556
Prudul26A026779P1	Myb_box5_MYB	2.0979	-233	-228
Prudul26A026779P1	G_box2_bZIP	2.203	-442	-437
Gene	TF_Name	Z-Score	Start	End
Prudul26A026986P1	G_box_bHLH	3.3255	-476	-471
Prudul26A026986P1	Myb_box2_MYB	2.817	-640	-635
Prudul26A026986P1	DREB_AP2_EREBP	2.6898	-793	-788
Prudul26A026986P1	Myb_box3_MYB	2.0848	-43	-38
Prudul26A026986P1	Myb_box5_MYB	2.7802	-641	-636
Gene	TF_Name	Z-Score	Start	End
Prudul26A027050P1	G_box2_bZIP	2.5865	-545	-540
Prudul26A027050P1	Myb_box5_MYB	2.4894	-537	-532
Gene	TF_Name	Z-Score	Start	End
Prudul26A027163P1	W_box_WRKY	2.2455	-756	-751
Prudul26A027163P1	Myb_box5_MYB	2.1217	-648	-643
Prudul26A027163P1	Myb_box5_MYB	2.1217	-945	-940
Prudul26A027163P1	HSE1_HSF	1.6629	-506	-499
Prudul26A027163P1	Myb_box1_MYB	2.2066	-648	-643
Prudul26A027163P1	Myb_box1_MYB	2.2066	-945	-940
Prudul26A027163P1	Myb_box4_MYB	2.8451	-692	-686
Prudul26A027163P1	HBE_HB	1.6244	-527	-519
Prudul26A027163P1	DREB_AP2_EREBP	2.7527	-180	-175
Gene	TF_Name	Z-Score	Start	End
Prudul26A027240P1	G_box2_bZIP	2.6482	-363	-358
Prudul26A027240P1	G_box2_bZIP	2.6482	-707	-702
Prudul26A027240P1	N_box_bHLH	2.496	-511	-506
Prudul26A027240P1	AuxRE_ARF	2.4678	-158	-153
Prudul26A027240P1	AuxRE_ARF	2.4678	-111	-106
Prudul26A027240P1	AuxRE_ARF	2.4678	-133	-128
Prudul26A027240P1	AuxRE_ARF	2.4678	-130	-125
Prudul26A027240P1	W_box_WRKY	1.9873	-72	-67
Prudul26A027240P1	W_box_WRKY	1.9873	-852	-847
Prudul26A027240P1	Myb_box5_MYB	2.5882	-468	-463
Prudul26A027240P1	Myb_box5_MYB	2.5882	-92	-87
Prudul26A027240P1	Nac_box_NAC	2.625	-387	-382
Prudul26A027240P1	Myb_box3_MYB	1.9477	-567	-562
Prudul26A027240P1	Myb_box1_MYB	2.6848	-468	-463
Prudul26A027240P1	Myb_box1_MYB	2.6848	-92	-87
Gene	TF_Name	Z-Score	Start	End
Prudul26A027369P1	G_box2_bZIP	2.3097	-923	-918
Prudul26A027369P1	Myb_box5_MYB	2.1988	-461	-456
Prudul26A027369P1	Myb_box2_MYB	3.0439	-618	-613
Prudul26A027369P1	Myb_box4_MYB	2.9258	-547	-541
Prudul26A027369P1	Myb_box4_MYB	2.9258	-286	-280
Prudul26A027369P1	AuxRE_ARF	2.9622	-627	-622
Prudul26A027369P1	G_box_bHLH	3.5175	-446	-441
Gene	TF_Name	Z-Score	Start	End
Prudul26A027381P1	C_ABRE_bZIP	3.6263	-466	-461
Prudul26A027381P1	Myb_box5_MYB	1.974	-1000	-995
Prudul26A027381P1	Myb_box5_MYB	1.974	-368	-363
Prudul26A027381P1	Myb_box4_MYB	2.7352	-324	-318
Prudul26A027381P1	Myb_box4_MYB	2.7352	-999	-993
Prudul26A027381P1	Nac_box_NAC	2.6687	-948	-943
Prudul26A027381P1	HBE_HB	2.0992	-339	-331
Gene	TF_Name	Z-Score	Start	End
Prudul26A027427P1	Myb_box5_MYB	1.9994	-177	-172
Prudul26A027427P1	Myb_box5_MYB	1.9994	-528	-523
Prudul26A027427P1	Myb_box5_MYB	1.9994	-965	-960
Prudul26A027427P1	Myb_box1_MYB	2.1575	-528	-523
Prudul26A027427P1	C_ABRE_bZIP	3.9487	-589	-584
Prudul26A027427P1	N_box_bHLH	2.7027	-751	-746
Gene	TF_Name	Z-Score	Start	End
Prudul26A027434P1	Myb_box2_MYB	2.7481	-745	-740
Prudul26A027434P1	Myb_box1_MYB	2.0446	-171	-166
Prudul26A027434P1	Myb_box1_MYB	2.0446	-223	-218
Prudul26A027434P1	Myb_box1_MYB	2.0446	-819	-814
Prudul26A027434P1	Myb_box5_MYB	2.7205	-169	-164
Prudul26A027434P1	Nac_box_NAC	2.6843	-503	-498
Prudul26A027434P1	W_box_WRKY	2.1072	-829	-824
Prudul26A027434P1	W_box_WRKY	2.1072	-106	-101
Prudul26A027434P1	Myb_box3_MYB	2.0345	-327	-322
Gene	TF_Name	Z-Score	Start	End
Prudul26A027682P1	Myb_box3_MYB	1.8383	-547	-542
Prudul26A027682P1	Myb_box3_MYB	1.8383	-485	-480
Prudul26A027682P1	G_box2_bZIP	1.8444	-92	-87
Prudul26A027682P1	DREB_AP2_EREBP	2.8846	-658	-653
Prudul26A027682P1	Myb_box5_MYB	2.4152	-542	-537
Prudul26A027682P1	GCC_box_AP2_EREBP	3.6775	-703	-698
Prudul26A027682P1	GCC_box_AP2_EREBP	3.6775	-702	-697
Prudul26A027682P1	Nac_box_NAC	2.3753	-96	-91
Prudul26A027682P1	AuxRE_ARF	2.3772	-341	-336
Prudul26A027682P1	AuxRE_ARF	2.3772	-347	-342
Prudul26A027682P1	AuxRE_ARF	2.3772	-344	-339
Gene	TF_Name	Z-Score	Start	End
Prudul26A027812P1	Myb_box1_MYB	2.3893	-826	-821
Prudul26A027812P1	Myb_box1_MYB	2.3893	-369	-364
Prudul26A027812P1	Myb_box5_MYB	2.2906	-826	-821
Prudul26A027812P1	Myb_box5_MYB	2.2906	-828	-823
Prudul26A027812P1	Myb_box5_MYB	2.2906	-369	-364
Prudul26A027812P1	Myb_box5_MYB	2.2906	-921	-916
Prudul26A027812P1	Myb_box2_MYB	3.1678	-313	-308
Prudul26A027812P1	AuxRE_ARF	2.9575	-881	-876
Prudul26A027812P1	AuxRE_ARF	2.9575	-567	-562
Prudul26A027812P1	AuxRE_ARF	2.9575	-640	-635
Gene	TF_Name	Z-Score	Start	End
Prudul26A027812P2	AuxRE_ARF	2.9575	-881	-876
Prudul26A027812P2	AuxRE_ARF	2.9575	-567	-562
Prudul26A027812P2	AuxRE_ARF	2.9575	-640	-635
Prudul26A027812P2	Myb_box5_MYB	2.2906	-826	-821
Prudul26A027812P2	Myb_box5_MYB	2.2906	-828	-823
Prudul26A027812P2	Myb_box5_MYB	2.2906	-369	-364
Prudul26A027812P2	Myb_box5_MYB	2.2906	-921	-916
Prudul26A027812P2	Myb_box1_MYB	2.3893	-826	-821
Prudul26A027812P2	Myb_box1_MYB	2.3893	-369	-364
Prudul26A027812P2	Myb_box2_MYB	3.1678	-313	-308
Gene	TF_Name	Z-Score	Start	End
Prudul26A027937P1	C_ABRE_bZIP	3.1064	-324	-319
Prudul26A027937P1	AuxRE_ARF	2.1683	-910	-905
Prudul26A027937P1	DREB_AP2_EREBP	2.7239	-571	-566
Prudul26A027937P1	N_box_bHLH	2.7232	-634	-629
Prudul26A027937P1	G_box_bHLH	2.6802	-558	-553
Prudul26A027937P1	W_box_WRKY	1.6574	-21	-16
Prudul26A027937P1	G_box2_bZIP	2.2131	-165	-160
Prudul26A027937P1	Myb_box2_MYB	2.2422	-265	-260
Gene	TF_Name	Z-Score	Start	End
Prudul26A028261P1	Myb_box5_MYB	2.5737	-66	-61
Prudul26A028261P1	G_box_bHLH	3.1218	-238	-233
Prudul26A028261P1	C_ABRE_bZIP	3.6346	-214	-209
Prudul26A028261P1	Nac_box_NAC	2.6019	-436	-431
Prudul26A028261P1	Myb_box1_MYB	1.9353	-617	-612
Gene	TF_Name	Z-Score	Start	End
Prudul26A028321P1	G_box_bHLH	3.4447	-481	-476
Prudul26A028321P1	Myb_box2_MYB	2.7648	-386	-381
Prudul26A028321P1	AuxRE_ARF	2.7174	-333	-328
Prudul26A028321P1	Myb_box1_MYB	2.9738	-615	-610
Prudul26A028321P1	Myb_box5_MYB	2.9069	-615	-610
Prudul26A028321P1	Myb_box5_MYB	2.9069	-647	-642
Gene	TF_Name	Z-Score	Start	End
Prudul26A028401P1	Myb_box3_MYB	2.0291	-261	-256
Prudul26A028401P1	Myb_box2_MYB	2.7133	-677	-672
Prudul26A028401P1	G_box_bHLH	3.2498	-870	-865
Prudul26A028401P1	Myb_box5_MYB	2.7511	-678	-673
Prudul26A028401P1	Myb_box5_MYB	2.7511	-608	-603
Gene	TF_Name	Z-Score	Start	End
Prudul26A028617P1	Myb_box5_MYB	2.6617	-712	-707
Prudul26A028617P1	W_box_WRKY	2.0177	-397	-392
Prudul26A028617P1	W_box_WRKY	2.0177	-798	-793
Prudul26A028617P1	AuxRE_ARF	2.3979	-327	-322
Prudul26A028617P1	AuxRE_ARF	2.3979	-330	-325
Prudul26A028617P1	Myb_box1_MYB	1.9922	-157	-152
Prudul26A028617P1	G_box2_bZIP	1.9645	-362	-357
Prudul26A028617P1	G_box2_bZIP	1.9645	-372	-367
Prudul26A028617P1	G_box2_bZIP	1.9645	-537	-532
Prudul26A028617P1	Myb_box4_MYB	2.5795	-762	-756
Gene	TF_Name	Z-Score	Start	End
Prudul26A028755P1	Myb_box5_MYB	2.5505	-972	-967
Prudul26A028755P1	Myb_box4_MYB	2.3708	-240	-234
Prudul26A028755P1	Myb_box3_MYB	1.8944	-960	-955
Prudul26A028755P1	Myb_box1_MYB	2.6272	-972	-967
Gene	TF_Name	Z-Score	Start	End
Prudul26A029159P1	W_box_WRKY	2.106	-854	-849
Prudul26A029159P1	Myb_box5_MYB	2.843	-881	-876
Prudul26A029159P1	N_box_bHLH	3.3999	-632	-627
Prudul26A029159P1	DREB_AP2_EREBP	2.7207	-567	-562
Prudul26A029159P1	Nac_box_NAC	2.6852	-356	-351
Prudul26A029159P1	GCC_box_AP2_EREBP	4.2794	-347	-342
Prudul26A029159P1	G_box_bHLH	3.2684	-509	-504
Gene	TF_Name	Z-Score	Start	End
Prudul26A029499P1	Myb_box3_MYB	2.0972	-607	-602
Prudul26A029499P1	GCC_box_AP2_EREBP	3.8734	-305	-300
Prudul26A029499P1	Myb_box5_MYB	2.6418	-356	-351
Prudul26A029499P1	Myb_box5_MYB	2.6418	-165	-160
Gene	TF_Name	Z-Score	Start	End
Prudul26A029558P1	Myb_box2_MYB	2.9673	-455	-450
Prudul26A029558P1	Myb_box2_MYB	2.9673	-608	-603
Prudul26A029558P1	Myb_box1_MYB	2.9855	-746	-741
Prudul26A029558P1	Myb_box5_MYB	2.9857	-746	-741
Prudul26A029558P1	W_box_WRKY	1.512	-66	-61
Prudul26A029558P1	AuxRE_ARF	2.8502	-655	-650
Gene	TF_Name	Z-Score	Start	End
Prudul26A029585P1	DREB_AP2_EREBP	2.6638	-547	-542
Prudul26A029585P1	Myb_box5_MYB	1.952	-118	-113
Prudul26A029585P1	Myb_box5_MYB	1.952	-684	-679
Prudul26A029585P1	Myb_box4_MYB	2.6201	-192	-186
Prudul26A029585P1	C_ABRE_bZIP	3.8246	-977	-972
Prudul26A029585P1	W_box_WRKY	2.1474	-187	-182
Prudul26A029585P1	W_box_WRKY	2.1474	-459	-454
Prudul26A029585P1	W_box_WRKY	2.1474	-916	-911
Prudul26A029585P1	Myb_box3_MYB	2.0765	-972	-967
Gene	TF_Name	Z-Score	Start	End
Prudul26A029991P1	DREB_AP2_EREBP	2.5753	-358	-353
Prudul26A029991P1	AuxRE_ARF	2.7189	-341	-336
Prudul26A029991P1	Myb_box5_MYB	1.9072	-614	-609
Prudul26A029991P1	W_box_WRKY	2.1504	-379	-374
Gene	TF_Name	Z-Score	Start	End
Prudul26A029991P1	W_box_WRKY	2.1882	-99	-94
Prudul26A029991P1	Myb_box5_MYB	1.9977	-334	-329
Prudul26A029991P1	AuxRE_ARF	2.7228	-61	-56
Prudul26A029991P1	DREB_AP2_EREBP	2.6596	-78	-73
Gene	TF_Name	Z-Score	Start	End
Prudul26A030162P1	Myb_box5_MYB	1.856	-427	-422
Prudul26A030162P1	Myb_box2_MYB	2.5678	-94	-89
Prudul26A030162P1	Myb_box2_MYB	2.5678	-459	-454
Prudul26A030162P1	Myb_box4_MYB	2.4465	-824	-818
Prudul26A030162P1	DREB_AP2_EREBP	3.1143	-735	-730
Prudul26A030162P1	DREB_AP2_EREBP	3.1143	-552	-547
Prudul26A030162P1	N_box_bHLH	2.4891	-466	-461
Gene	TF_Name	Z-Score	Start	End
Prudul26A030296P2	G_box2_bZIP	2.0292	-967	-962
Prudul26A030296P2	G_box1_bZIP	3.7492	-85	-78
Prudul26A030296P2	Myb_box2_MYB	2.6178	-77	-72
Prudul26A030296P2	Myb_box5_MYB	2.6262	-78	-73
Prudul26A030296P2	G_box_bHLH	3.1412	-84	-79
Prudul26A030296P2	G_box_bHLH	3.1412	-703	-698
Prudul26A030296P2	Myb_box1_MYB	2.0024	-180	-175
Prudul26A030296P2	G_ABRE_bZIP	3.4183	-84	-77
Gene	TF_Name	Z-Score	Start	End
Prudul26A030619P1	W_box_WRKY	1.5203	-672	-667
Prudul26A030619P1	Myb_box5_MYB	2.7393	-724	-719
Prudul26A030619P1	GCC_box_AP2_EREBP	4.172	-186	-181
Prudul26A030619P1	N_box_bHLH	3.2634	-69	-64
Prudul26A030619P1	Myb_box1_MYB	2.836	-724	-719
Gene	TF_Name	Z-Score	Start	End
Prudul26A030619P1	W_box_WRKY	1.5203	-672	-667
Prudul26A030619P1	Myb_box5_MYB	2.7393	-724	-719
Prudul26A030619P1	GCC_box_AP2_EREBP	4.172	-186	-181
Prudul26A030619P1	N_box_bHLH	3.2634	-69	-64
Prudul26A030619P1	Myb_box1_MYB	2.836	-724	-719
Gene	TF_Name	Z-Score	Start	End
Prudul26A030619P1	W_box_WRKY	1.5203	-672	-667
Prudul26A030619P1	Myb_box5_MYB	2.7393	-724	-719
Prudul26A030619P1	GCC_box_AP2_EREBP	4.172	-186	-181
Prudul26A030619P1	N_box_bHLH	3.2634	-69	-64
Prudul26A030619P1	Myb_box1_MYB	2.836	-724	-719
Gene	TF_Name	Z-Score	Start	End
Prudul26A030641P1	Myb_box4_MYB	2.6789	-773	-767
Prudul26A030641P1	DREB_AP2_EREBP	2.666	-634	-629
Prudul26A030641P1	Myb_box5_MYB	2.7666	-123	-118
Prudul26A030641P1	Myb_box1_MYB	2.8499	-123	-118
Prudul26A030641P1	G_box_bHLH	3.2893	-891	-886
Gene	TF_Name	Z-Score	Start	End
Prudul26A030781P1	W_box_WRKY	2.2883	-677	-672
Prudul26A030781P1	W_box_WRKY	2.2883	-9	-4
Prudul26A030781P1	Myb_box1_MYB	2.9881	-190	-185
Prudul26A030781P1	Myb_box1_MYB	2.9881	-310	-305
Prudul26A030781P1	Myb_box5_MYB	2.907	-310	-305
Prudul26A030781P1	Myb_box5_MYB	2.907	-190	-185
Prudul26A030781P1	HBE_HB	1.5794	-593	-585
Prudul26A030781P1	Myb_box2_MYB	2.8374	-142	-137
Gene	TF_Name	Z-Score	Start	End
Prudul26A030876P1	Myb_box3_MYB	2.3067	-973	-968
Prudul26A030876P1	W_box_WRKY	2.3846	-125	-120
Prudul26A030876P1	W_box_WRKY	2.3846	-168	-163
Prudul26A030876P1	Myb_box2_MYB	3.0316	-57	-52
Prudul26A030876P1	Myb_box5_MYB	2.1906	-536	-531
Prudul26A030876P1	DREB_AP2_EREBP	2.9041	-36	-31
Prudul26A030876P1	DREB_AP2_EREBP	2.9041	-65	-60
Prudul26A030876P1	Myb_box1_MYB	2.3229	-536	-531
Gene	TF_Name	Z-Score	Start	End
Prudul26A030978P1	Myb_box4_MYB	2.6334	-853	-847
Prudul26A030978P1	Myb_box3_MYB	2.0758	-519	-514
Prudul26A030978P1	Myb_box5_MYB	2.7229	-85	-80
Prudul26A030978P1	Myb_box2_MYB	2.7343	-655	-650
Prudul26A030978P1	Myb_box1_MYB	2.0835	-699	-694
Prudul26A030978P1	G_box2_bZIP	2.0816	-410	-405
Gene	TF_Name	Z-Score	Start	End
Prudul26A030990P1	W_box_WRKY	1.5133	-929	-924
Prudul26A030990P1	DREB_AP2_EREBP	3.6392	-181	-176
Gene	TF_Name	Z-Score	Start	End
Prudul26A030993P1	Nac_box_NAC	2.7803	-491	-486
Prudul26A030993P1	DREB_AP2_EREBP	2.6957	-855	-850
Prudul26A030993P1	Myb_box5_MYB	2.802	-167	-162
Prudul26A030993P1	Myb_box1_MYB	2.8987	-167	-162
Prudul26A030993P1	W_box_WRKY	1.5059	-182	-177
Prudul26A030993P1	W_box_WRKY	1.5059	-562	-557
Gene	TF_Name	Z-Score	Start	End
Prudul26A031130P1	G_box_bHLH	3.6955	-357	-352
Prudul26A031130P1	DREB_AP2_EREBP	3.0287	-706	-701
Prudul26A031130P1	Myb_box5_MYB	2.2465	-626	-621
Prudul26A031130P1	Myb_box5_MYB	2.2465	-26	-21
Prudul26A031130P1	Myb_box5_MYB	2.2465	-628	-623
Prudul26A031130P1	Myb_box3_MYB	2.3717	-904	-899
Prudul26A031130P1	Myb_box1_MYB	1.6041	-904	-899
Prudul26A031130P1	G_box2_bZIP	2.4044	-431	-426
Gene	TF_Name	Z-Score	Start	End
Prudul26A031132P1	Myb_box2_MYB	2.4815	-512	-507
Prudul26A031132P1	Myb_box4_MYB	2.3769	-396	-390
Prudul26A031132P1	Myb_box4_MYB	2.3769	-465	-459
Prudul26A031132P1	Myb_box4_MYB	2.3769	-460	-454
Prudul26A031132P1	G_box_bHLH	3.2722	-133	-128
Prudul26A031132P1	Myb_box5_MYB	1.9083	-235	-230
Prudul26A031132P1	Myb_box5_MYB	1.9083	-399	-394
Prudul26A031132P1	Myb_box5_MYB	1.9083	-401	-396
Prudul26A031132P1	Myb_box1_MYB	2.0962	-235	-230
Prudul26A031132P1	Myb_box1_MYB	2.0962	-401	-396
Gene	TF_Name	Z-Score	Start	End
Prudul26A031132P1	Myb_box2_MYB	2.4815	-512	-507
Prudul26A031132P1	Myb_box4_MYB	2.3769	-396	-390
Prudul26A031132P1	Myb_box4_MYB	2.3769	-465	-459
Prudul26A031132P1	Myb_box4_MYB	2.3769	-460	-454
Prudul26A031132P1	G_box_bHLH	3.2722	-133	-128
Prudul26A031132P1	Myb_box5_MYB	1.9083	-235	-230
Prudul26A031132P1	Myb_box5_MYB	1.9083	-399	-394
Prudul26A031132P1	Myb_box5_MYB	1.9083	-401	-396
Prudul26A031132P1	Myb_box1_MYB	2.0962	-235	-230
Prudul26A031132P1	Myb_box1_MYB	2.0962	-401	-396
Gene	TF_Name	Z-Score	Start	End
Prudul26A031320P1	Nac_box_NAC	2.6344	-675	-670
Prudul26A031320P1	Myb_box3_MYB	2.0488	-894	-889
Prudul26A031320P1	Myb_box3_MYB	2.0488	-158	-153
Prudul26A031320P1	Myb_box5_MYB	1.9904	-236	-231
Prudul26A031320P1	Myb_box4_MYB	2.8176	-46	-40
Prudul26A031320P1	G_box_bHLH	3.2984	-750	-745
Gene	TF_Name	Z-Score	Start	End
Prudul26A031320P1	Nac_box_NAC	2.6344	-675	-670
Prudul26A031320P1	Myb_box3_MYB	2.0488	-894	-889
Prudul26A031320P1	Myb_box3_MYB	2.0488	-158	-153
Prudul26A031320P1	Myb_box5_MYB	1.9904	-236	-231
Prudul26A031320P1	Myb_box4_MYB	2.8176	-46	-40
Prudul26A031320P1	G_box_bHLH	3.2984	-750	-745
Gene	TF_Name	Z-Score	Start	End
Prudul26A031589P1	HBE_HB	1.6136	-132	-124
Prudul26A031589P1	W_box_WRKY	2.3683	-811	-806
Prudul26A031589P1	W_box_WRKY	2.3683	-663	-658
Prudul26A031589P1	W_box_WRKY	2.3683	-938	-933
Prudul26A031589P1	Myb_box4_MYB	2.8826	-966	-960
Prudul26A031589P1	AuxRE_ARF	2.9007	-269	-264
Prudul26A031589P1	Nac_box_NAC	2.9201	-854	-849
Prudul26A031589P1	Myb_box5_MYB	2.1718	-989	-984
Gene	TF_Name	Z-Score	Start	End
Prudul26A031989P1	G_box2_bZIP	2.1154	-453	-448
Prudul26A031989P1	G_box2_bZIP	2.1154	-52	-47
Prudul26A031989P1	Myb_box2_MYB	2.705	-380	-375
Prudul26A031989P1	AuxRE_ARF	2.7835	-371	-366
Prudul26A031989P1	Myb_box1_MYB	2.8292	-464	-459
Prudul26A031989P1	Myb_box5_MYB	2.7181	-464	-459
Gene	TF_Name	Z-Score	Start	End
Prudul26A032223P1	Myb_box2_MYB	2.8405	-871	-866
Prudul26A032223P1	Myb_box5_MYB	1.976	-83	-78
Prudul26A032223P1	Myb_box5_MYB	1.976	-998	-993
Prudul26A032223P1	Myb_box5_MYB	1.976	-182	-177
Prudul26A032223P1	Myb_box1_MYB	2.0683	-182	-177
Prudul26A032223P1	Nac_box_NAC	2.6717	-495	-490
Gene	TF_Name	Z-Score	Start	End
Prudul26A032253P1	Myb_box2_MYB	2.9749	-149	-144
Prudul26A032253P1	N_box_bHLH	2.715	-137	-132
Prudul26A032253P1	G_box2_bZIP	2.0598	-999	-994
Prudul26A032253P1	Myb_box5_MYB	2.8254	-914	-909
Prudul26A032253P1	Myb_box1_MYB	2.8253	-914	-909
Prudul26A032253P1	AuxRE_ARF	2.7731	-565	-560
Gene	TF_Name	Z-Score	Start	End
Prudul26A032640P1	W_box_WRKY	1.6331	-855	-850
Prudul26A032640P1	DREB_AP2_EREBP	3.6278	-871	-866
Prudul26A032640P1	Myb_box5_MYB	2.2189	-993	-988
Gene	TF_Name	Z-Score	Start	End
Prudul26A032718P1	Nac_box_NAC	2.758	-82	-77
Prudul26A032718P1	DREB_AP2_EREBP	2.7588	-32	-27
Prudul26A032718P1	C_ABRE_bZIP	3.9211	-575	-570
Gene	TF_Name	Z-Score	Start	End
Prudul26A032807P1	Nac_box_NAC	2.6347	-48	-43
Prudul26A032807P1	Nac_box_NAC	2.6347	-965	-960
Prudul26A032807P1	Myb_box5_MYB	2.6568	-516	-511
Prudul26A032807P1	Myb_box5_MYB	2.6568	-518	-513
Prudul26A032807P1	N_box_bHLH	3.2237	-739	-734
Prudul26A032807P1	Myb_box3_MYB	1.9819	-632	-627
Prudul26A032807P1	AuxRE_ARF	2.5893	-474	-469
Prudul26A032807P1	Myb_box1_MYB	2.7315	-516	-511
Prudul26A032807P1	Myb_box1_MYB	2.7315	-518	-513
Gene	TF_Name	Z-Score	Start	End
Prudul26A032858P1	Myb_box1_MYB	1.6261	-332	-327
Prudul26A032858P1	Myb_box5_MYB	3.2182	-553	-548
Prudul26A032858P1	Myb_box3_MYB	2.3522	-332	-327
Prudul26A032858P1	G_box2_bZIP	2.3898	-966	-961
Prudul26A032858P1	HBE_HB	1.6521	-925	-917
Prudul26A032858P1	AuxRE_ARF	2.9569	-984	-979
Gene	TF_Name	Z-Score	Start	End
Prudul26A032989P1	Myb_box4_MYB	2.2946	-597	-591
Prudul26A032989P1	Myb_box2_MYB	2.407	-936	-931
Prudul26A032989P1	GCC_box_AP2_EREBP	3.7814	-376	-371
Prudul26A032989P1	Myb_box5_MYB	2.4465	-842	-837
Prudul26A032989P1	G_box_bHLH	2.9534	-44	-39

## Sheet: P. mume
Gene	TF_Name	Z-Score	Start	End
Pm000727	Myb_box5_MYB	2.5372	-182	-177
Pm000727	Myb_box2_MYB	2.5475	-649	-644
Pm000727	Myb_box1_MYB	1.9414	-746	-741
Pm000727	Myb_box1_MYB	1.9414	-723	-718
Pm000727	Myb_box1_MYB	1.9414	-184	-179
Pm000727	W_box_WRKY	2.0104	-733	-728
Pm000727	W_box_WRKY	2.0104	-119	-114
Pm000727	Nac_box_NAC	2.5463	-408	-403
Gene	TF_Name	Z-Score	Start	End
Pm000767	Myb_box1_MYB	1.5334	-300	-295
Pm000767	Myb_box5_MYB	2.1597	-51	-46
Pm000767	Nac_box_NAC	2.9307	-943	-938
Pm000767	Myb_box3_MYB	2.2448	-300	-295
Pm000767	W_box_WRKY	1.5234	-588	-583
Pm000767	Myb_box4_MYB	2.8122	-48	-42
Gene	TF_Name	Z-Score	Start	End
Pm000871	Myb_box2_MYB	2.7515	-684	-679
Pm000871	Myb_box2_MYB	2.7515	-785	-780
Pm000871	AuxRE_ARF	2.8285	-190	-185
Pm000871	W_box_WRKY	2.3125	-12	-7
Pm000871	W_box_WRKY	2.3125	-247	-242
Pm000871	N_box_bHLH	2.7773	-173	-168
Pm000871	Myb_box1_MYB	3.0002	-395	-390
Pm000871	Myb_box5_MYB	2.8506	-395	-390
Pm000871	Myb_box4_MYB	2.6264	-118	-112
Gene	TF_Name	Z-Score	Start	End
Pm000906	Myb_box5_MYB	2.7371	-187	-182
Pm000906	Myb_box1_MYB	2.076	-189	-184
Pm000906	Myb_box1_MYB	2.076	-785	-780
Pm000906	Myb_box2_MYB	2.7632	-711	-706
Pm000906	W_box_WRKY	2.1326	-124	-119
Gene	TF_Name	Z-Score	Start	End
Pm002350	GCC_box_AP2_EREBP	4.0111	-354	-349
Pm002350	Myb_box4_MYB	2.2601	-749	-743
Pm002350	DREB_AP2_EREBP	3.1352	-992	-987
Pm002350	Myb_box3_MYB	1.9406	-910	-905
Pm002350	Myb_box1_MYB	1.9094	-875	-870
Pm002350	Myb_box1_MYB	1.9094	-374	-369
Pm002350	Myb_box5_MYB	1.7325	-177	-172
Pm002350	Myb_box5_MYB	1.7325	-374	-369
Pm002350	Myb_box5_MYB	1.7325	-752	-747
Pm002350	Myb_box5_MYB	1.7325	-240	-235
Pm002350	Myb_box5_MYB	1.7325	-444	-439
Pm002350	Myb_box5_MYB	1.7325	-875	-870
Pm002350	Myb_box5_MYB	1.7325	-632	-627
Pm002350	G_box_bHLH	3.1643	-832	-827
Pm002350	W_box_WRKY	1.9629	-428	-423
Pm002350	Myb_box2_MYB	2.3508	-631	-626
Pm002350	Myb_box2_MYB	2.3508	-635	-630
Gene	TF_Name	Z-Score	Start	End
Pm002446	Myb_box2_MYB	2.7023	-891	-886
Pm002446	Myb_box2_MYB	2.7023	-906	-901
Pm002446	Myb_box2_MYB	2.7023	-849	-844
Pm002446	Myb_box5_MYB	1.9703	-24	-19
Gene	TF_Name	Z-Score	Start	End
Pm000871	Myb_box4_MYB	2.8193	-39	-33
Pm000871	Myb_box5_MYB	2.048	-967	-962
Pm000871	Myb_box5_MYB	2.048	-555	-550
Pm000871	Myb_box5_MYB	2.048	-949	-944
Pm000871	Myb_box5_MYB	2.048	-564	-559
Pm000871	DREB_AP2_EREBP	2.8011	-781	-776
Pm000871	C_ABRE_bZIP	3.9165	-229	-224
Gene	TF_Name	Z-Score	Start	End
Pm002485	Myb_box2_MYB	2.4459	-681	-676
Pm002485	Myb_box2_MYB	2.4459	-685	-680
Pm002485	Myb_box1_MYB	2.6613	-457	-452
Pm002485	Myb_box1_MYB	2.6613	-147	-142
Pm002485	W_box_WRKY	1.9243	-181	-176
Pm002485	W_box_WRKY	1.9243	-437	-432
Pm002485	Myb_box3_MYB	1.8897	-397	-392
Pm002485	Myb_box4_MYB	2.3429	-677	-671
Pm002485	Myb_box4_MYB	2.3429	-672	-666
Pm002485	G_box_bHLH	3.1532	-308	-303
Pm002485	Myb_box5_MYB	2.5792	-457	-452
Pm002485	Myb_box5_MYB	2.5792	-147	-142
Pm002485	AuxRE_ARF	2.4127	-44	-39
Pm002485	AuxRE_ARF	2.4127	-847	-842
Gene	TF_Name	Z-Score	Start	End
Pm002487	G_box_bHLH	3.3839	-415	-410
Pm002487	W_box_WRKY	2.191	-764	-759
Gene	TF_Name	Z-Score	Start	End
Pm002520	G_box_bHLH	3.0604	-274	-269
Pm002520	G_ABRE_bZIP	3.3612	-274	-267
Pm002520	Myb_box5_MYB	1.6934	-291	-286
Pm002520	Myb_box5_MYB	1.6934	-425	-420
Pm002520	Myb_box5_MYB	1.6934	-586	-581
Gene	TF_Name	Z-Score	Start	End
Pm002679	W_box_WRKY	1.5285	-246	-241
Pm002679	W_box_WRKY	1.5285	-628	-623
Pm002679	G_box_bHLH	3.5155	-396	-391
Pm002679	Myb_box5_MYB	2.1785	-523	-518
Pm002679	Myb_box5_MYB	2.1785	-754	-749
Pm002679	G_box2_bZIP	2.2807	-294	-289
Gene	TF_Name	Z-Score	Start	End
Pm002771	N_box_bHLH	2.4815	-670	-665
Pm002771	G_box2_bZIP	1.9331	-143	-138
Pm002771	W_box_WRKY	2.0136	-330	-325
Pm002771	AuxRE_ARF	2.5652	-17	-12
Pm002771	AuxRE_ARF	2.5652	-132	-127
Pm002771	Myb_box5_MYB	1.7904	-897	-892
Gene	TF_Name	Z-Score	Start	End
Pm002825	G_box2_bZIP	1.9856	-273	-268
Pm002825	Myb_box2_MYB	2.8378	-360	-355
Pm002825	Nac_box_NAC	2.5206	-405	-400
Pm002825	Nac_box_NAC	2.5206	-901	-896
Pm002825	AuxRE_ARF	2.5605	-79	-74
Pm002825	Myb_box5_MYB	2.7117	-868	-863
Pm002825	Myb_box1_MYB	2.7044	-868	-863
Gene	TF_Name	Z-Score	Start	End
Pm002826	Myb_box4_MYB	2.9343	-431	-425
Pm002826	W_box_WRKY	2.3095	-190	-185
Pm002826	Nac_box_NAC	2.8568	-212	-207
Pm002826	Myb_box1_MYB	2.2548	-539	-534
Pm002826	Myb_box5_MYB	3.0361	-217	-212
Gene	TF_Name	Z-Score	Start	End
Pm002857	G_box_bHLH	3.3815	-704	-699
Pm002857	W_box_WRKY	2.1999	-97	-92
Pm002857	Myb_box5_MYB	2.8805	-763	-758
Pm002857	Myb_box1_MYB	2.9424	-763	-758
Pm002857	Myb_box3_MYB	2.1489	-302	-297
Gene	TF_Name	Z-Score	Start	End
Pm002914	N_box_bHLH	3.2173	-172	-167
Gene	TF_Name	Z-Score	Start	End
Pm002923	Myb_box5_MYB	2.4708	-565	-560
Pm002923	Myb_box4_MYB	2.2151	-83	-77
Pm002923	C_ABRE_bZIP	3.5579	-143	-138
Pm002923	Myb_box1_MYB	2.5949	-565	-560
Pm002923	N_box_bHLH	2.9956	-351	-346
Pm002923	Myb_box2_MYB	2.2799	-312	-307
Pm002923	Myb_box2_MYB	2.2799	-178	-173
Gene	TF_Name	Z-Score	Start	End
Pm002977	Myb_box5_MYB	1.9934	-507	-502
Pm002977	Myb_box5_MYB	1.9934	-825	-820
Pm002977	Myb_box5_MYB	1.9934	-371	-366
Pm002977	AuxRE_ARF	2.6874	-991	-986
Gene	TF_Name	Z-Score	Start	End
Pm003579	N_box_bHLH	2.8638	-563	-558
Pm003579	Nac_box_NAC	2.3636	-158	-153
Pm003579	G_box1_bZIP	3.3576	-254	-247
Pm003579	G_box2_bZIP	1.8049	-774	-769
Pm003579	G_box2_bZIP	1.8049	-731	-726
Pm003579	Myb_box4_MYB	2.1915	-100	-94
Pm003579	GCC_box_AP2_EREBP	3.6092	-613	-608
Pm003579	GCC_box_AP2_EREBP	3.6092	-275	-270
Pm003579	GCC_box_AP2_EREBP	3.6092	-612	-607
Pm003579	G_box_bHLH	2.8409	-253	-248
Pm003579	Myb_box5_MYB	1.6693	-36	-31
Pm003579	W_box_WRKY	1.8709	-259	-254
Gene	TF_Name	Z-Score	Start	End
Pm003634	DREB_AP2_EREBP	3.1914	-262	-257
Pm003634	Myb_box5_MYB	1.9757	-314	-309
Pm003634	Myb_box5_MYB	1.9757	-985	-980
Pm003634	G_box2_bZIP	2.0986	-826	-821
Pm003634	Myb_box3_MYB	2.0802	-869	-864
Pm003634	Myb_box4_MYB	2.5851	-143	-137
Pm003634	Myb_box1_MYB	2.09	-314	-309
Pm003634	N_box_bHLH	3.2228	-342	-337
Gene	TF_Name	Z-Score	Start	End
Pm003639	Myb_box5_MYB	2.023	-874	-869
Pm003639	C_ABRE_bZIP	3.9482	-612	-607
Pm003639	DREB_AP2_EREBP	2.7696	-32	-27
Gene	TF_Name	Z-Score	Start	End
Pm003648	GCC_box_AP2_EREBP	4.1574	-586	-581
Pm003648	Myb_box5_MYB	2.7015	-45	-40
Pm003648	Nac_box_NAC	2.7166	-21	-16
Pm003648	Nac_box_NAC	2.7166	-381	-376
Pm003648	AuxRE_ARF	2.6949	-532	-527
Pm003648	N_box_bHLH	2.6162	-931	-926
Pm003648	DREB_AP2_EREBP	2.611	-43	-38
Pm003648	HSE1_HSF	1.5242	-293	-286
Pm003648	Myb_box2_MYB	2.7484	-46	-41
Pm003648	Myb_box2_MYB	2.7484	-56	-51
Gene	TF_Name	Z-Score	Start	End
Pm003668	Myb_box4_MYB	2.3232	-401	-395
Pm003668	Myb_box4_MYB	2.3232	-34	-28
Pm003668	Myb_box2_MYB	2.4025	-396	-391
Pm003668	Myb_box5_MYB	2.4018	-963	-958
Pm003668	Myb_box1_MYB	2.4552	-963	-958
Gene	TF_Name	Z-Score	Start	End
Pm003676	N_box_bHLH	3.3778	-97	-92
Pm003676	Myb_box5_MYB	2.8029	-722	-717
Pm003676	Myb_box1_MYB	2.8054	-722	-717
Pm003676	AuxRE_ARF	2.6383	-294	-289
Pm003676	W_box_WRKY	2.1281	-701	-696
Gene	TF_Name	Z-Score	Start	End
Pm003697	DREB_AP2_EREBP	2.595	-507	-502
Pm003697	DREB_AP2_EREBP	2.595	-511	-506
Pm003697	DREB_AP2_EREBP	2.595	-515	-510
Pm003697	DREB_AP2_EREBP	2.595	-519	-514
Pm003697	Myb_box1_MYB	2.0293	-343	-338
Pm003697	Myb_box1_MYB	2.0293	-856	-851
Pm003697	Myb_box5_MYB	1.8976	-856	-851
Pm003697	Myb_box5_MYB	1.8976	-41	-36
Pm003697	Myb_box5_MYB	1.8976	-343	-338
Pm003697	Myb_box5_MYB	1.8976	-43	-38
Pm003697	Myb_box4_MYB	2.5333	-133	-127
Pm003697	Myb_box4_MYB	2.5333	-306	-300
Pm003697	Myb_box2_MYB	2.6844	-626	-621
Gene	TF_Name	Z-Score	Start	End
Pm003703	W_box_WRKY	2.0816	-988	-983
Pm003703	Myb_box2_MYB	2.7479	-254	-249
Pm003703	Myb_box2_MYB	2.7479	-709	-704
Pm003703	Myb_box2_MYB	2.7479	-701	-696
Pm003703	Myb_box2_MYB	2.7479	-705	-700
Pm003703	DREB_AP2_EREBP	2.6396	-818	-813
Pm003703	G_box2_bZIP	1.9916	-559	-554
Gene	TF_Name	Z-Score	Start	End
Pm004662	Myb_box2_MYB	2.0358	-577	-572
Pm004662	N_box_bHLH	2.7377	-569	-564
Pm004662	Myb_box4_MYB	1.9086	-520	-514
Pm004662	Myb_box4_MYB	1.9086	-607	-601
Pm004662	Myb_box5_MYB	2.2962	-588	-583
Gene	TF_Name	Z-Score	Start	End
Pm004807	Myb_box1_MYB	2.1234	-70	-65
Pm004807	Nac_box_NAC	2.7892	-374	-369
Pm004807	Myb_box2_MYB	2.559	-84	-79
Pm004807	Myb_box5_MYB	2.7624	-106	-101
Pm004807	Myb_box5_MYB	2.7624	-154	-149
Gene	TF_Name	Z-Score	Start	End
Pm004966	N_box_bHLH	3.4839	-843	-838
Pm004966	Nac_box_NAC	2.8271	-203	-198
Pm004966	Nac_box_NAC	2.8271	-318	-313
Pm004966	Myb_box5_MYB	2.1122	-74	-69
Pm004966	Myb_box5_MYB	2.1122	-401	-396
Pm004966	DREB_AP2_EREBP	3.4493	-657	-652
Pm004966	GCC_box_AP2_EREBP	4.391	-655	-650
Pm004966	Myb_box3_MYB	2.2201	-267	-262
Gene	TF_Name	Z-Score	Start	End
Pm005059	Myb_box5_MYB	2.11	-347	-342
Pm005059	Myb_box1_MYB	2.2002	-347	-342
Pm005059	W_box_WRKY	2.2677	-926	-921
Pm005059	Myb_box2_MYB	2.913	-191	-186
Pm005059	G_box2_bZIP	2.195	-295	-290
Gene	TF_Name	Z-Score	Start	End
Pm005062	G_box_bHLH	3.1509	-104	-99
Pm005062	Nac_box_NAC	2.5934	-463	-458
Pm005062	Myb_box5_MYB	1.9466	-551	-546
Pm005062	Myb_box5_MYB	1.9466	-676	-671
Pm005062	Myb_box3_MYB	1.9876	-448	-443
Pm005062	AuxRE_ARF	2.341	-40	-35
Pm005062	DREB_AP2_EREBP	2.6246	-866	-861
Gene	TF_Name	Z-Score	Start	End
Pm005116	Myb_box1_MYB	2.7198	-493	-488
Pm005116	Myb_box2_MYB	2.5195	-885	-880
Pm005116	Myb_box3_MYB	1.9702	-680	-675
Pm005116	Myb_box3_MYB	1.9702	-476	-471
Pm005116	Myb_box5_MYB	2.6199	-711	-706
Pm005116	Myb_box5_MYB	2.6199	-493	-488
Pm005116	G_box_bHLH	3.1792	-460	-455
Pm005116	G_box2_bZIP	2.0005	-985	-980
Pm005116	GCC_box_AP2_EREBP	4.0764	-85	-80
Pm005116	AuxRE_ARF	2.5661	-759	-754
Gene	TF_Name	Z-Score	Start	End
Pm005147	AuxRE_ARF	2.905	-89	-84
Pm005147	Nac_box_NAC	2.8954	-119	-114
Pm005147	Myb_box5_MYB	2.1614	-731	-726
Pm005147	Myb_box5_MYB	2.1614	-962	-957
Pm005147	W_box_WRKY	1.5496	-571	-566
Pm005147	G_box_bHLH	3.5034	-114	-109
Gene	TF_Name	Z-Score	Start	End
Pm005158	Myb_box3_MYB	2.1007	-230	-225
Pm005158	Myb_box3_MYB	2.1007	-96	-91
Pm005158	AuxRE_ARF	2.7582	-965	-960
Pm005158	Myb_box1_MYB	2.1264	-181	-176
Pm005158	Myb_box1_MYB	2.1264	-128	-123
Pm005158	Myb_box1_MYB	2.1264	-47	-42
Pm005158	Myb_box1_MYB	2.1264	-262	-257
Pm005158	Nac_box_NAC	2.7625	-142	-137
Pm005158	Nac_box_NAC	2.7625	-276	-271
Pm005158	Myb_box5_MYB	2.0847	-473	-468
Pm005158	Myb_box5_MYB	2.0847	-47	-42
Pm005158	Myb_box5_MYB	2.0847	-181	-176
Pm005158	Myb_box5_MYB	2.0847	-128	-123
Pm005158	Myb_box5_MYB	2.0847	-322	-317
Pm005158	Myb_box5_MYB	2.0847	-262	-257
Pm005158	W_box_WRKY	2.2182	-354	-349
Gene	TF_Name	Z-Score	Start	End
Pm005258	W_box_WRKY	1.7513	-995	-990
Pm005258	AuxRE_ARF	2.2649	-325	-320
Pm005258	Myb_box3_MYB	1.7029	-329	-324
Pm005258	Myb_box3_MYB	1.7029	-927	-922
Gene	TF_Name	Z-Score	Start	End
Pm005103	Myb_box5_MYB	3.0167	-729	-724
Pm005103	G_box_bHLH	3.5316	-972	-967
Pm005103	G_box2_bZIP	2.2708	-221	-216
Gene	TF_Name	Z-Score	Start	End
Pm005322	G_ABRE_bZIP	3.1379	-476	-469
Pm005322	Myb_box4_MYB	2.1704	-495	-489
Pm005322	Myb_box4_MYB	2.1704	-886	-880
Pm005322	Myb_box5_MYB	1.6459	-383	-378
Pm005322	Myb_box5_MYB	1.6459	-471	-466
Pm005322	Myb_box5_MYB	1.6459	-535	-530
Pm005322	Myb_box1_MYB	1.7966	-383	-378
Pm005322	Myb_box1_MYB	1.7966	-471	-466
Pm005322	Myb_box1_MYB	1.7966	-535	-530
Pm005322	AuxRE_ARF	2.3458	-43	-38
Pm005322	AuxRE_ARF	2.3458	-485	-480
Pm005322	G_box_bHLH	2.8922	-476	-471
Gene	TF_Name	Z-Score	Start	End
Pm005333	G_box_bHLH	2.8988	-565	-560
Pm005333	Myb_box1_MYB	2.4745	-324	-319
Pm005333	Myb_box1_MYB	2.4745	-195	-190
Pm005333	N_box_bHLH	2.8757	-283	-278
Pm005333	N_box_bHLH	2.8757	-412	-407
Pm005333	Myb_box5_MYB	2.376	-195	-190
Pm005333	Myb_box5_MYB	2.376	-324	-319
Pm005333	G_box2_bZIP	1.8413	-879	-874
Pm005333	C_ABRE_bZIP	3.368	-971	-966
Gene	TF_Name	Z-Score	Start	End
Pm005344	Myb_box2_MYB	2.7379	-531	-526
Pm005344	Myb_box2_MYB	2.7379	-298	-293
Pm005344	Myb_box1_MYB	2.698	-982	-977
Pm005344	Myb_box5_MYB	2.6541	-982	-977
Pm005344	Myb_box3_MYB	1.959	-854	-849
Pm005344	Myb_box3_MYB	1.959	-799	-794
Gene	TF_Name	Z-Score	Start	End
Pm005357	G_box_bHLH	3.4916	-508	-503
Pm005357	G_box2_bZIP	2.998	-115	-110
Pm005357	Myb_box5_MYB	2.2052	-584	-579
Pm005357	Myb_box5_MYB	2.2052	-414	-409
Pm005357	AuxRE_ARF	2.9644	-194	-189
Pm005357	W_box_WRKY	1.6256	-283	-278
Pm005357	Myb_box1_MYB	2.2838	-584	-579
Gene	TF_Name	Z-Score	Start	End
Pm005511	Myb_box1_MYB	1.7839	-116	-111
Pm005511	Myb_box1_MYB	1.7839	-560	-555
Pm005511	AuxRE_ARF	2.3197	-569	-564
Pm005511	AuxRE_ARF	2.3197	-257	-252
Pm005511	N_box_bHLH	2.2886	-298	-293
Pm005511	Myb_box2_MYB	2.2342	-778	-773
Pm005511	Myb_box2_MYB	2.2342	-838	-833
Pm005511	Myb_box5_MYB	2.3681	-562	-557
Pm005511	Myb_box5_MYB	2.3681	-839	-834
Pm005511	Myb_box5_MYB	2.3681	-779	-774
Gene	TF_Name	Z-Score	Start	End
Pm005575	W_box_WRKY	1.9102	-842	-837
Pm005575	Myb_box4_MYB	2.3957	-991	-985
Pm005575	AuxRE_ARF	2.4078	-352	-347
Pm005575	DREB_AP2_EREBP	2.3591	-127	-122
Gene	TF_Name	Z-Score	Start	End
Pm005638	Myb_box2_MYB	2.3342	-858	-853
Pm005638	Myb_box2_MYB	2.3342	-184	-179
Pm005638	Myb_box5_MYB	1.644	-190	-185
Pm005638	W_box_WRKY	1.916	-544	-539
Pm005638	Myb_box1_MYB	1.8144	-190	-185
Pm005638	Myb_box3_MYB	1.8094	-140	-135
Pm005638	N_box_bHLH	2.2918	-21	-16
Pm005638	N_box_bHLH	2.2918	-298	-293
Pm005638	N_box_bHLH	2.2918	-210	-205
Pm005638	Myb_box4_MYB	2.1997	-979	-973
Gene	TF_Name	Z-Score	Start	End
Pm005681	AuxRE_ARF	2.7453	-90	-85
Pm005681	AuxRE_ARF	2.7453	-843	-838
Pm005681	AuxRE_ARF	2.7453	-926	-921
Pm005681	Nac_box_NAC	2.9035	-724	-719
Pm005681	Myb_box2_MYB	2.9573	-733	-728
Pm005681	Myb_box4_MYB	2.9272	-797	-791
Pm005681	Myb_box5_MYB	3.1266	-732	-727
Gene	TF_Name	Z-Score	Start	End
Pm005717	Nac_box_NAC	2.6979	-374	-369
Pm005717	W_box_WRKY	2.1585	-816	-811
Pm005717	W_box_WRKY	2.1585	-579	-574
Pm005717	W_box_WRKY	2.1585	-355	-350
Pm005717	Myb_box1_MYB	2.068	-303	-298
Pm005717	Myb_box1_MYB	2.068	-436	-431
Pm005717	Myb_box2_MYB	2.6198	-761	-756
Pm005717	Myb_box3_MYB	2.066	-780	-775
Pm005717	Myb_box5_MYB	2.6632	-305	-300
Pm005717	Myb_box4_MYB	2.504	-63	-57
Pm005717	AuxRE_ARF	2.6716	-564	-559
Pm005717	AuxRE_ARF	2.6716	-738	-733
Gene	TF_Name	Z-Score	Start	End
Pm005739	Myb_box3_MYB	2.059	-615	-610
Pm005739	Myb_box2_MYB	2.7531	-672	-667
Pm005739	AuxRE_ARF	2.747	-697	-692
Pm005739	G_box_bHLH	3.185	-303	-298
Pm005739	Nac_box_NAC	2.6862	-314	-309
Pm005739	Nac_box_NAC	2.6862	-625	-620
Gene	TF_Name	Z-Score	Start	End
Pm005740	N_box_bHLH	2.2576	-290	-285
Pm005740	Myb_box1_MYB	1.7448	-409	-404
Pm005740	Myb_box5_MYB	2.397	-546	-541
Pm005740	Myb_box5_MYB	2.397	-636	-631
Pm005740	G_box2_bZIP	1.7534	-312	-307
Pm005740	Myb_box2_MYB	2.215	-558	-553
Pm005740	Myb_box2_MYB	2.215	-635	-630
Pm005740	W_box_WRKY	1.8127	-472	-467
Pm005740	Myb_box4_MYB	2.0907	-563	-557
Gene	TF_Name	Z-Score	Start	End
Pm005758	Nac_box_NAC	2.6191	-499	-494
Pm005758	Myb_box4_MYB	2.437	-184	-178
Pm005758	Myb_box5_MYB	1.8697	-182	-177
Pm005758	Myb_box5_MYB	1.8697	-474	-469
Pm005758	Myb_box5_MYB	1.8697	-428	-423
Pm005758	Myb_box2_MYB	2.5569	-913	-908
Pm005758	G_box_bHLH	3.1316	-901	-896
Pm005758	Myb_box3_MYB	1.9739	-135	-130
Pm005758	G_box2_bZIP	1.9972	-949	-944
Gene	TF_Name	Z-Score	Start	End
Pm005794	G_box_bHLH	3.5353	-918	-913
Pm005794	AuxRE_ARF	2.8061	-831	-826
Pm005794	AuxRE_ARF	2.8061	-18	-13
Pm005794	Myb_box4_MYB	2.8921	-619	-613
Pm005794	Myb_box2_MYB	3.0179	-324	-319
Pm005794	Myb_box5_MYB	2.1614	-327	-322
Pm005794	G_box2_bZIP	2.23	-487	-482
Pm005794	Myb_box3_MYB	2.2068	-912	-907
Pm005794	N_box_bHLH	3.5997	-697	-692
Gene	TF_Name	Z-Score	Start	End
Pm005983	Myb_box5_MYB	1.8506	-754	-749
Pm005983	Myb_box5_MYB	1.8506	-562	-557
Pm005983	Myb_box5_MYB	1.8506	-560	-555
Pm005983	AuxRE_ARF	2.5588	-409	-404
Pm005983	Myb_box3_MYB	1.9618	-158	-153
Pm005983	Myb_box3_MYB	1.9618	-874	-869
Pm005983	Myb_box1_MYB	1.9616	-754	-749
Pm005983	Myb_box1_MYB	1.9616	-560	-555
Pm005983	G_box2_bZIP	2.6984	-154	-149
Pm005983	W_box_WRKY	2.0685	-238	-233
Gene	TF_Name	Z-Score	Start	End
Pm006179	AuxRE_ARF	2.5993	-139	-134
Pm006179	AuxRE_ARF	2.5993	-789	-784
Pm006179	AuxRE_ARF	2.5993	-336	-331
Pm006179	Myb_box5_MYB	1.9946	-536	-531
Pm006179	Myb_box5_MYB	1.9946	-362	-357
Pm006179	Myb_box5_MYB	1.9946	-382	-377
Pm006179	Myb_box5_MYB	1.9946	-707	-702
Pm006179	Myb_box1_MYB	2.0468	-536	-531
Pm006179	Myb_box1_MYB	2.0468	-362	-357
Pm006179	Myb_box1_MYB	2.0468	-382	-377
Pm006179	N_box_bHLH	2.6791	-558	-553
Gene	TF_Name	Z-Score	Start	End
Pm006264	AuxRE_ARF	2.4376	-756	-751
Pm006264	Myb_box5_MYB	2.4892	-616	-611
Pm006264	Nac_box_NAC	2.5167	-900	-895
Pm006264	G_box2_bZIP	2.568	-801	-796
Pm006264	Myb_box3_MYB	1.8516	-225	-220
Pm006264	Myb_box3_MYB	1.8516	-402	-397
Gene	TF_Name	Z-Score	Start	End
Pm006269	Myb_box2_MYB	2.3959	-201	-196
Pm006269	G_box_bHLH	2.9644	-132	-127
Pm006269	Myb_box4_MYB	2.3173	-94	-88
Pm006269	Nac_box_NAC	2.4436	-822	-817
Pm006269	W_box_WRKY	1.8479	-363	-358
Pm006269	W_box_WRKY	1.8479	-560	-555
Pm006269	Myb_box5_MYB	1.6974	-854	-849
Pm006269	Myb_box5_MYB	1.6974	-527	-522
Pm006269	Myb_box5_MYB	1.6974	-202	-197
Pm006269	Myb_box5_MYB	1.6974	-262	-257
Gene	TF_Name	Z-Score	Start	End
Pm006360	C_ABRE_bZIP	3.425	-528	-523
Pm006360	Myb_box1_MYB	2.5805	-818	-813
Pm006360	G_box_bHLH	2.9845	-769	-764
Pm006360	Myb_box5_MYB	2.4916	-818	-813
Pm006360	AuxRE_ARF	2.4317	-354	-349
Pm006360	AuxRE_ARF	2.4317	-163	-158
Gene	TF_Name	Z-Score	Start	End
Pm006471	G_box2_bZIP	2.1174	-686	-681
Pm006471	Myb_box5_MYB	1.9942	-720	-715
Pm006471	Myb_box5_MYB	1.9942	-106	-101
Pm006471	Myb_box5_MYB	1.9942	-277	-272
Pm006471	Myb_box5_MYB	1.9942	-532	-527
Pm006471	Myb_box5_MYB	1.9942	-722	-717
Pm006471	HSE1_HSF	1.5685	-629	-622
Pm006471	Myb_box1_MYB	2.1166	-720	-715
Pm006471	Myb_box1_MYB	2.1166	-722	-717
Pm006471	C_ABRE_bZIP	3.804	-711	-706
Gene	TF_Name	Z-Score	Start	End
Pm006520	Myb_box5_MYB	2.0998	-249	-244
Pm006520	Myb_box5_MYB	2.0998	-455	-450
Pm006520	Myb_box5_MYB	2.0998	-347	-342
Pm006520	Myb_box5_MYB	2.0998	-625	-620
Pm006520	Myb_box3_MYB	2.2274	-886	-881
Pm006520	G_box2_bZIP	2.256	-379	-374
Pm006520	W_box_WRKY	1.569	-387	-382
Pm006520	C_ABRE_bZIP	3.9801	-271	-266
Pm006520	Myb_box1_MYB	2.2278	-347	-342
Pm006520	Myb_box1_MYB	2.2278	-455	-450
Pm006520	Myb_box2_MYB	2.9334	-401	-396
Pm006520	Myb_box2_MYB	2.9334	-407	-402
Pm006520	Nac_box_NAC	2.9074	-897	-892
Pm006520	AuxRE_ARF	2.8683	-131	-126
Pm006520	AuxRE_ARF	2.8683	-134	-129
Pm006520	AuxRE_ARF	2.8683	-146	-141
Pm006520	AuxRE_ARF	2.8683	-143	-138
Pm006520	DREB_AP2_EREBP	2.8067	-201	-196
Gene	TF_Name	Z-Score	Start	End
Pm006538	Myb_box5_MYB	2.6716	-821	-816
Pm006538	Myb_box1_MYB	2.0167	-522	-517
Pm006538	C_ABRE_bZIP	3.6239	-327	-322
Pm006538	N_box_bHLH	2.5612	-151	-146
Pm006538	DREB_AP2_EREBP	3.2199	-651	-646
Pm006538	AuxRE_ARF	2.5668	-242	-237
Gene	TF_Name	Z-Score	Start	End
Pm006551	Myb_box2_MYB	2.8486	-38	-33
Pm006551	Myb_box5_MYB	2.0785	-627	-622
Pm006551	AuxRE_ARF	2.6706	-411	-406
Pm006551	AuxRE_ARF	2.6706	-75	-70
Pm006551	Myb_box4_MYB	2.7837	-232	-226
Pm006551	Myb_box1_MYB	2.1628	-627	-622
Pm006551	W_box_WRKY	2.1454	-527	-522
Pm006551	G_box2_bZIP	2.1091	-89	-84
Pm006551	Nac_box_NAC	2.766	-25	-20
Gene	TF_Name	Z-Score	Start	End
Pm006556	Myb_box5_MYB	1.9098	-775	-770
Pm006556	Myb_box5_MYB	1.9098	-777	-772
Pm006556	Myb_box5_MYB	1.9098	-533	-528
Pm006556	Myb_box3_MYB	1.9908	-801	-796
Pm006556	W_box_WRKY	2.0654	-387	-382
Pm006556	G_box2_bZIP	1.9933	-352	-347
Pm006556	G_box2_bZIP	1.9933	-604	-599
Gene	TF_Name	Z-Score	Start	End
Pm006572	Myb_box1_MYB	1.6455	-592	-587
Pm006572	Myb_box5_MYB	1.574	-599	-594
Pm006572	Myb_box5_MYB	1.574	-592	-587
Pm006572	G_box2_bZIP	2.2075	-778	-773
Gene	TF_Name	Z-Score	Start	End
Pm006576	Myb_box5_MYB	1.8672	-306	-301
Pm006576	Myb_box2_MYB	2.5762	-279	-274
Pm006576	AuxRE_ARF	2.5336	-215	-210
Gene	TF_Name	Z-Score	Start	End
Pm006580	Nac_box_NAC	2.6771	-498	-493
Pm006580	Myb_box5_MYB	2.0563	-132	-127
Pm006580	Myb_box5_MYB	2.0563	-719	-714
Pm006580	Myb_box5_MYB	2.0563	-73	-68
Pm006580	Myb_box5_MYB	2.0563	-43	-38
Pm006580	Myb_box3_MYB	2.0956	-403	-398
Pm006580	AuxRE_ARF	2.7788	-962	-957
Pm006580	AuxRE_ARF	2.7788	-563	-558
Pm006580	Myb_box1_MYB	2.1139	-132	-127
Gene	TF_Name	Z-Score	Start	End
Pm006647	G_box2_bZIP	2.0883	-25	-20
Pm006647	Myb_box2_MYB	2.7931	-88	-83
Pm006647	Myb_box2_MYB	2.7931	-233	-228
Pm006647	Myb_box1_MYB	2.0872	-741	-736
Pm006647	Myb_box1_MYB	2.0872	-83	-78
Pm006647	Myb_box1_MYB	2.0872	-662	-657
Pm006647	Myb_box5_MYB	1.9771	-741	-736
Pm006647	Myb_box5_MYB	1.9771	-83	-78
Pm006647	Myb_box5_MYB	1.9771	-87	-82
Pm006647	Myb_box5_MYB	1.9771	-662	-657
Pm006647	Myb_box5_MYB	1.9771	-712	-707
Pm006647	Myb_box5_MYB	1.9771	-119	-114
Pm006647	Myb_box5_MYB	1.9771	-85	-80
Pm006647	AuxRE_ARF	2.7217	-187	-182
Gene	TF_Name	Z-Score	Start	End
Pm006682	G_box2_bZIP	2.0165	-28	-23
Pm006682	Myb_box5_MYB	1.9386	-853	-848
Pm006682	Myb_box5_MYB	1.9386	-155	-150
Pm006682	Myb_box5_MYB	1.9386	-774	-769
Gene	TF_Name	Z-Score	Start	End
Pm006733	N_box_bHLH	2.6316	-565	-560
Pm006733	Myb_box3_MYB	2.0698	-348	-343
Pm006733	GCC_box_AP2_EREBP	4.0612	-743	-738
Pm006733	Myb_box2_MYB	2.6033	-702	-697
Pm006733	DREB_AP2_EREBP	3.2708	-745	-740
Pm006733	Myb_box5_MYB	2.7408	-703	-698
Pm006733	G_box2_bZIP	2.7353	-570	-565
Gene	TF_Name	Z-Score	Start	End
Pm006793	N_box_bHLH	2.6852	-97	-92
Pm006793	DREB_AP2_EREBP	2.6578	-993	-988
Pm006793	DREB_AP2_EREBP	2.6578	-18	-13
Pm006793	DREB_AP2_EREBP	2.6578	-24	-19
Pm006793	Myb_box1_MYB	2.797	-912	-907
Pm006793	Nac_box_NAC	2.7106	-522	-517
Pm006793	G_box_bHLH	3.2992	-464	-459
Pm006793	G_box2_bZIP	2.0842	-755	-750
Pm006793	Myb_box5_MYB	2.7546	-912	-907
Gene	TF_Name	Z-Score	Start	End
Pm007005	Myb_box2_MYB	2.5261	-81	-76
Pm007005	Myb_box2_MYB	2.5261	-30	-25
Pm007005	DREB_AP2_EREBP	2.5172	-341	-336
Pm007005	Myb_box5_MYB	2.6227	-994	-989
Pm007005	N_box_bHLH	3.1691	-74	-69
Pm007005	Myb_box1_MYB	1.9903	-53	-48
Pm007005	Nac_box_NAC	2.5695	-684	-679
Pm007005	Nac_box_NAC	2.5695	-553	-548
Gene	TF_Name	Z-Score	Start	End
Pm007023	G_box2_bZIP	2.2767	-761	-756
Pm007023	W_box_WRKY	2.3589	-904	-899
Pm007023	W_box_WRKY	2.3589	-900	-895
Pm007023	DREB_AP2_EREBP	2.9105	-284	-279
Pm007023	Myb_box1_MYB	2.3016	-996	-991
Pm007023	Myb_box5_MYB	2.1995	-7	-2
Pm007023	Myb_box5_MYB	2.1995	-550	-545
Pm007023	Myb_box5_MYB	2.1995	-552	-547
Pm007023	Myb_box5_MYB	2.1995	-996	-991
Pm007023	AuxRE_ARF	3.0477	-565	-560
Pm007023	AuxRE_ARF	3.0477	-471	-466
Pm007023	AuxRE_ARF	3.0477	-441	-436
Gene	TF_Name	Z-Score	Start	End
Pm007035	Myb_box5_MYB	2.2294	-6	-1
Pm007035	Myb_box1_MYB	2.336	-6	-1
Gene	TF_Name	Z-Score	Start	End
Pm008389	G_ABRE_bZIP	2.8125	-331	-324
Pm008389	Myb_box5_MYB	2.265	-815	-810
Pm008389	Myb_box2_MYB	2.1553	-402	-397
Pm008389	DREB_AP2_EREBP	2.7166	-463	-458
Pm008389	G_box_bHLH	2.6743	-331	-326
Pm008389	G_box_bHLH	2.6743	-534	-529
Pm008389	N_box_bHLH	2.7372	-377	-372
Pm008389	Nac_box_NAC	2.2292	-531	-526
Gene	TF_Name	Z-Score	Start	End
Pm008474	AuxRE_ARF	2.2781	-464	-459
Pm008474	Nac_box_NAC	2.3062	-193	-188
Pm008474	Nac_box_NAC	2.3062	-502	-497
Pm008474	G_box2_bZIP	1.7393	-889	-884
Pm008474	GCC_box_AP2_EREBP	3.7108	-904	-899
Pm008474	GCC_box_AP2_EREBP	3.7108	-905	-900
Pm008474	Myb_box4_MYB	2.4452	-523	-517
Pm008474	N_box_bHLH	2.9143	-717	-712
Gene	TF_Name	Z-Score	Start	End
Pm008498	Myb_box2_MYB	2.7115	-424	-419
Pm008498	Nac_box_NAC	2.5946	-596	-591
Pm008498	Nac_box_NAC	2.5946	-682	-677
Pm008498	Myb_box1_MYB	1.9897	-452	-447
Pm008498	AuxRE_ARF	2.6403	-208	-203
Pm008498	W_box_WRKY	2.0929	-197	-192
Pm008498	W_box_WRKY	2.0929	-509	-504
Pm008498	Myb_box5_MYB	1.8853	-337	-332
Pm008498	Myb_box5_MYB	1.8853	-745	-740
Pm008498	Myb_box5_MYB	1.8853	-452	-447
Gene	TF_Name	Z-Score	Start	End
Pm008782	W_box_WRKY	2.0508	-155	-150
Pm008782	Myb_box3_MYB	2.021	-766	-761
Pm008782	Nac_box_NAC	2.6953	-625	-620
Pm008782	Nac_box_NAC	2.6953	-603	-598
Pm008782	Myb_box1_MYB	2.0322	-547	-542
Pm008782	Myb_box2_MYB	2.5856	-245	-240
Pm008782	Myb_box5_MYB	1.8866	-651	-646
Pm008782	Myb_box5_MYB	1.8866	-547	-542
Pm008782	Myb_box5_MYB	1.8866	-59	-54
Pm008782	G_box_bHLH	3.1965	-657	-652
Gene	TF_Name	Z-Score	Start	End
Pm008960	Myb_box1_MYB	2.141	-34	-29
Pm008960	Myb_box1_MYB	2.141	-339	-334
Pm008960	Myb_box1_MYB	2.141	-774	-769
Pm008960	Myb_box3_MYB	2.1025	-1000	-995
Pm008960	Myb_box2_MYB	2.514	-66	-61
Pm008960	Myb_box2_MYB	2.514	-465	-460
Pm008960	Myb_box2_MYB	2.514	-482	-477
Pm008960	Myb_box2_MYB	2.514	-506	-501
Pm008960	Myb_box5_MYB	1.9951	-503	-498
Pm008960	Myb_box5_MYB	1.9951	-608	-603
Pm008960	Myb_box5_MYB	1.9951	-34	-29
Pm008960	Myb_box5_MYB	1.9951	-413	-408
Pm008960	Myb_box5_MYB	1.9951	-656	-651
Pm008960	Myb_box5_MYB	1.9951	-339	-334
Pm008960	Myb_box5_MYB	1.9951	-774	-769
Pm008960	W_box_WRKY	2.053	-679	-674
Gene	TF_Name	Z-Score	Start	End
Pm008988	Myb_box3_MYB	2.0478	-907	-902
Pm008988	AuxRE_ARF	2.4799	-28	-23
Pm008988	AuxRE_ARF	2.4799	-23	-18
Pm008988	G_box_bHLH	3.2135	-835	-830
Gene	TF_Name	Z-Score	Start	End
Pm009002	Myb_box5_MYB	2.1443	-813	-808
Pm009002	Myb_box5_MYB	2.1443	-897	-892
Pm009002	Myb_box1_MYB	2.181	-897	-892
Pm009002	G_box_bHLH	3.4188	-723	-718
Pm009002	HSE1_HSF	1.5559	-985	-978
Pm009002	AuxRE_ARF	2.7384	-875	-870
Gene	TF_Name	Z-Score	Start	End
Pm009766	Nac_box_NAC	2.2969	-407	-402
Pm009766	Myb_box5_MYB	2.2908	-730	-725
Pm009766	Myb_box5_MYB	2.2908	-556	-551
Pm009766	Myb_box2_MYB	2.2725	-690	-685
Pm009766	Myb_box2_MYB	2.2725	-402	-397
Pm009766	Myb_box2_MYB	2.2725	-555	-550
Gene	TF_Name	Z-Score	Start	End
Pm010051	AuxRE_ARF	2.6468	-16	-11
Pm010051	Myb_box3_MYB	1.9858	-561	-556
Pm010051	G_box_bHLH	3.1923	-267	-262
Pm010051	W_box_WRKY	2.0782	-55	-50
Pm010051	Nac_box_NAC	2.6913	-270	-265
Pm010051	Myb_box5_MYB	2.6034	-876	-871
Pm010051	DREB_AP2_EREBP	2.5014	-256	-251
Pm010051	DREB_AP2_EREBP	2.5014	-101	-96
Pm010051	DREB_AP2_EREBP	2.5014	-222	-217
Gene	TF_Name	Z-Score	Start	End
Pm010052	C_ABRE_bZIP	3.2891	-170	-165
Pm010052	Nac_box_NAC	2.3477	-829	-824
Pm010052	Nac_box_NAC	2.3477	-173	-168
Pm010052	Myb_box5_MYB	2.3609	-241	-236
Pm010052	Myb_box5_MYB	2.3609	-550	-545
Pm010052	Myb_box1_MYB	2.4235	-550	-545
Gene	TF_Name	Z-Score	Start	End
Pm010075	Myb_box5_MYB	2.5781	-430	-425
Pm010075	Myb_box5_MYB	2.5781	-530	-525
Pm010075	Nac_box_NAC	3.2628	-335	-330
Pm010075	Myb_box1_MYB	1.7754	-697	-692
Pm010075	Myb_box3_MYB	2.5646	-697	-692
Pm010075	W_box_WRKY	1.7441	-64	-59
Gene	TF_Name	Z-Score	Start	End
Pm010083	Myb_box1_MYB	2.0755	-231	-226
Pm010083	G_box_bHLH	2.4547	-613	-608
Pm010083	G_box_bHLH	2.4547	-307	-302
Pm010083	G_box_bHLH	2.4547	-310	-305
Pm010083	AuxRE_ARF	1.8806	-13	-8
Pm010083	AuxRE_ARF	1.8806	-649	-644
Pm010083	AuxRE_ARF	1.8806	-623	-618
Pm010083	G_box1_bZIP	2.9838	-614	-607
Pm010083	Myb_box5_MYB	1.9629	-258	-253
Pm010083	Myb_box5_MYB	1.9629	-231	-226
Pm010083	Myb_box2_MYB	1.8198	-677	-672
Pm010083	Myb_box2_MYB	1.8198	-295	-290
Pm010083	DREB_AP2_EREBP	2.4285	-149	-144
Pm010083	DREB_AP2_EREBP	2.4285	-151	-146
Pm010083	N_box_bHLH	2.4141	-746	-741
Pm010083	G_box2_bZIP	2.0557	-738	-733
Pm010083	Myb_box4_MYB	1.6803	-688	-682
Pm010083	Myb_box4_MYB	1.6803	-762	-756
Pm010083	Myb_box4_MYB	1.6803	-768	-762
Gene	TF_Name	Z-Score	Start	End
Pm010102	Myb_box3_MYB	1.9106	-828	-823
Pm010102	Myb_box3_MYB	1.9106	-754	-749
Pm010102	W_box_WRKY	1.918	-688	-683
Pm010102	AuxRE_ARF	2.3873	-820	-815
Pm010102	AuxRE_ARF	2.3873	-371	-366
Pm010102	DREB_AP2_EREBP	2.3466	-728	-723
Pm010102	Myb_box5_MYB	1.727	-533	-528
Pm010102	G_box2_bZIP	1.9101	-883	-878
Pm010102	Myb_box1_MYB	1.9107	-533	-528
Gene	TF_Name	Z-Score	Start	End
Pm010149	Myb_box5_MYB	1.7467	-953	-948
Pm010149	Myb_box5_MYB	1.7467	-114	-109
Pm010149	Myb_box5_MYB	1.7467	-210	-205
Pm010149	Myb_box4_MYB	2.2911	-111	-105
Pm010149	G_box2_bZIP	1.8477	-423	-418
Pm010149	Myb_box3_MYB	1.864	-222	-217
Gene	TF_Name	Z-Score	Start	End
Pm010152	Myb_box1_MYB	2.2218	-792	-787
Pm010152	DREB_AP2_EREBP	2.0155	-899	-894
Pm010152	DREB_AP2_EREBP	2.0155	-93	-88
Pm010152	N_box_bHLH	2.5958	-255	-250
Pm010152	G_box2_bZIP	2.1731	-161	-156
Pm010152	G_box2_bZIP	2.1731	-107	-102
Pm010152	G_box2_bZIP	2.1731	-123	-118
Pm010152	G_box2_bZIP	2.1731	-115	-110
Pm010152	G_box2_bZIP	2.1731	-99	-94
Pm010152	Myb_box5_MYB	2.1383	-792	-787
Gene	TF_Name	Z-Score	Start	End
Pm010347	G_box2_bZIP	2.5185	-271	-266
Pm010347	W_box_WRKY	1.9028	-286	-281
Pm010347	Nac_box_NAC	2.4603	-530	-525
Pm010347	Myb_box5_MYB	2.5624	-326	-321
Pm010347	G_box_bHLH	3.0021	-766	-761
Pm010347	DREB_AP2_EREBP	2.4397	-541	-536
Gene	TF_Name	Z-Score	Start	End
Pm010350	Nac_box_NAC	2.9277	-458	-453
Pm010350	Myb_box5_MYB	2.1119	-78	-73
Pm010350	Myb_box5_MYB	2.1119	-229	-224
Pm010350	Myb_box5_MYB	2.1119	-964	-959
Pm010350	Myb_box5_MYB	2.1119	-597	-592
Pm010350	Myb_box5_MYB	2.1119	-206	-201
Pm010350	Myb_box5_MYB	2.1119	-263	-258
Pm010350	Myb_box5_MYB	2.1119	-962	-957
Pm010350	Myb_box5_MYB	2.1119	-960	-955
Pm010350	Myb_box2_MYB	2.8944	-961	-956
Pm010350	Myb_box1_MYB	2.2444	-229	-224
Gene	TF_Name	Z-Score	Start	End
Pm010367	Myb_box1_MYB	2.0331	-792	-787
Pm010367	AuxRE_ARF	2.5872	-387	-382
Pm010367	Myb_box5_MYB	2.7025	-277	-272
Gene	TF_Name	Z-Score	Start	End
Pm011051	Myb_box3_MYB	2.3187	-163	-158
Pm011051	Myb_box3_MYB	2.3187	-777	-772
Pm011051	W_box_WRKY	1.6302	-964	-959
Pm011051	W_box_WRKY	1.6302	-80	-75
Pm011051	AuxRE_ARF	2.9796	-297	-292
Pm011051	Myb_box1_MYB	2.3432	-521	-516
Pm011051	Myb_box5_MYB	2.2319	-419	-414
Pm011051	Myb_box5_MYB	2.2319	-107	-102
Pm011051	Myb_box5_MYB	2.2319	-521	-516
Pm011051	G_box2_bZIP	3.0605	-568	-563
Pm011051	DREB_AP2_EREBP	2.9748	-903	-898
Gene	TF_Name	Z-Score	Start	End
Pm011131	Myb_box5_MYB	2.0355	-292	-287
Pm011131	Myb_box5_MYB	2.0355	-463	-458
Pm011131	DREB_AP2_EREBP	2.7668	-568	-563
Pm011131	Myb_box2_MYB	2.776	-55	-50
Pm011131	GCC_box_AP2_EREBP	4.4147	-350	-345
Pm011131	N_box_bHLH	3.5007	-633	-628
Gene	TF_Name	Z-Score	Start	End
Pm011209	G_box2_bZIP	2.0034	-886	-881
Pm011209	AuxRE_ARF	2.4923	-299	-294
Pm011209	AuxRE_ARF	2.4923	-574	-569
Pm011209	AuxRE_ARF	2.4923	-543	-538
Pm011209	Myb_box5_MYB	1.9263	-944	-939
Pm011209	Myb_box5_MYB	1.9263	-904	-899
Pm011209	Myb_box5_MYB	1.9263	-111	-106
Pm011209	Myb_box5_MYB	1.9263	-987	-982
Pm011209	DREB_AP2_EREBP	2.6301	-909	-904
Gene	TF_Name	Z-Score	Start	End
Pm011249	G_box_bHLH	2.7259	-125	-120
Pm011249	G_ABRE_bZIP	2.4718	-618	-611
Pm011249	Nac_box_NAC	2.2156	-122	-117
Pm011249	Nac_box_NAC	2.2156	-839	-834
Pm011249	Myb_box1_MYB	2.356	-166	-161
Pm011249	G_box2_bZIP	1.6936	-955	-950
Pm011249	Myb_box5_MYB	2.3353	-166	-161
Pm011249	Myb_box2_MYB	2.4114	-489	-484
Pm011249	Myb_box2_MYB	2.4114	-434	-429
Pm011249	N_box_bHLH	2.213	-147	-142
Gene	TF_Name	Z-Score	Start	End
Pm011266	Myb_box2_MYB	3.125	-253	-248
Pm011266	Myb_box1_MYB	3.1176	-907	-902
Pm011266	W_box_WRKY	2.4011	-826	-821
Pm011266	G_box2_bZIP	2.3418	-229	-224
Pm011266	Myb_box5_MYB	3.0507	-254	-249
Pm011266	Myb_box5_MYB	3.0507	-907	-902
Gene	TF_Name	Z-Score	Start	End
Pm011290	Nac_box_NAC	2.6398	-469	-464
Pm011290	G_box2_bZIP	2.0119	-932	-927
Pm011290	G_box2_bZIP	2.0119	-871	-866
Gene	TF_Name	Z-Score	Start	End
Pm011332	Myb_box4_MYB	2.7877	-414	-408
Pm011332	Myb_box1_MYB	2.1049	-733	-728
Pm011332	W_box_WRKY	2.148	-473	-468
Pm011332	G_box2_bZIP	2.088	-679	-674
Pm011332	Nac_box_NAC	2.6843	-936	-931
Pm011332	Myb_box5_MYB	2.0104	-733	-728
Pm011332	Myb_box5_MYB	2.0104	-846	-841
Pm011332	Myb_box5_MYB	2.0104	-82	-77
Pm011332	Myb_box5_MYB	2.0104	-415	-410
Pm011332	HBE_HB	2.0887	-747	-739
Gene	TF_Name	Z-Score	Start	End
Pm011382	Myb_box1_MYB	1.9197	-207	-202
Pm011382	Myb_box1_MYB	1.9197	-571	-566
Pm011382	AuxRE_ARF	2.3788	-136	-131
Pm011382	Myb_box2_MYB	2.4468	-400	-395
Pm011382	W_box_WRKY	1.9443	-508	-503
Pm011382	G_box2_bZIP	2.5931	-452	-447
Pm011382	Nac_box_NAC	2.5359	-969	-964
Pm011382	Myb_box4_MYB	2.3354	-738	-732
Pm011382	Myb_box5_MYB	1.8012	-207	-202
Pm011382	Myb_box5_MYB	1.8012	-569	-564
Pm011382	Myb_box5_MYB	1.8012	-571	-566
Pm011382	Myb_box3_MYB	1.9112	-578	-573
Gene	TF_Name	Z-Score	Start	End
Pm012009	Myb_box1_MYB	2.2604	-527	-522
Pm012009	Myb_box5_MYB	2.9272	-10	-5
Pm012009	Myb_box2_MYB	2.7042	-490	-485
Pm012009	W_box_WRKY	1.5051	-42	-37
Pm012009	AuxRE_ARF	2.7651	-869	-864
Pm012009	Myb_box4_MYB	2.6412	-760	-754
Gene	TF_Name	Z-Score	Start	End
Pm012873	DREB_AP2_EREBP	2.1698	-959	-954
Pm012873	DREB_AP2_EREBP	2.1698	-893	-888
Pm012873	DREB_AP2_EREBP	2.1698	-963	-958
Pm012873	AuxRE_ARF	2.1873	-185	-180
Pm012873	N_box_bHLH	2.7744	-550	-545
Pm012873	Myb_box5_MYB	2.2391	-891	-886
Pm012873	G_box2_bZIP	1.6576	-678	-673
Pm012873	G_box2_bZIP	1.6576	-365	-360
Gene	TF_Name	Z-Score	Start	End
Pm012888	Myb_box2_MYB	2.3404	-551	-546
Pm012888	Myb_box3_MYB	1.8128	-199	-194
Pm012888	Myb_box3_MYB	1.8128	-86	-81
Pm012888	G_box_bHLH	2.9437	-890	-885
Pm012888	G_box_bHLH	2.9437	-865	-860
Pm012888	Myb_box5_MYB	2.4669	-714	-709
Gene	TF_Name	Z-Score	Start	End
Pm012909	AuxRE_ARF	2.8524	-204	-199
Pm012909	W_box_WRKY	1.5107	-190	-185
Pm012909	W_box_WRKY	1.5107	-377	-372
Pm012909	W_box_WRKY	1.5107	-22	-17
Pm012909	HBE_HB	1.5897	-330	-322
Pm012909	Myb_box3_MYB	2.2372	-394	-389
Pm012909	Myb_box5_MYB	2.1685	-156	-151
Pm012909	Myb_box1_MYB	1.5204	-394	-389
Gene	TF_Name	Z-Score	Start	End
Pm012925	Myb_box5_MYB	2.792	-416	-411
Pm012925	Myb_box3_MYB	2.0585	-891	-886
Pm012925	Myb_box3_MYB	2.0585	-447	-442
Pm012925	Myb_box2_MYB	2.6085	-947	-942
Pm012925	Myb_box2_MYB	2.6085	-671	-666
Pm012925	Myb_box2_MYB	2.6085	-867	-862
Pm012925	Myb_box2_MYB	2.6085	-871	-866
Gene	TF_Name	Z-Score	Start	End
Pm012933	G_box_bHLH	3.1067	-425	-420
Pm012933	Myb_box4_MYB	2.346	-188	-182
Pm012933	N_box_bHLH	2.517	-822	-817
Pm012933	Myb_box3_MYB	1.9489	-244	-239
Pm012933	Myb_box2_MYB	2.4508	-155	-150
Pm012933	Myb_box2_MYB	2.4508	-209	-204
Pm012933	Myb_box2_MYB	2.4508	-95	-90
Pm012933	Myb_box2_MYB	2.4508	-219	-214
Pm012933	Myb_box5_MYB	2.6029	-220	-215
Pm012933	W_box_WRKY	1.9863	-261	-256
Gene	TF_Name	Z-Score	Start	End
Pm012959	Myb_box5_MYB	2.5521	-971	-966
Pm012959	N_box_bHLH	2.4523	-21	-16
Pm012959	Myb_box1_MYB	2.6222	-971	-966
Pm012959	GCC_box_AP2_EREBP	4.0325	-806	-801
Pm012959	Myb_box2_MYB	2.5466	-638	-633
Pm012959	AuxRE_ARF	2.478	-811	-806
Pm012959	Nac_box_NAC	2.5391	-285	-280
Gene	TF_Name	Z-Score	Start	End
Pm012969	Myb_box5_MYB	1.7088	-584	-579
Pm012969	Myb_box5_MYB	1.7088	-323	-318
Pm012969	Myb_box5_MYB	1.7088	-910	-905
Pm012969	Myb_box2_MYB	2.2679	-150	-145
Pm012969	Myb_box2_MYB	2.2679	-248	-243
Pm012969	Myb_box2_MYB	2.2679	-730	-725
Pm012969	Myb_box2_MYB	2.2679	-734	-729
Pm012969	Myb_box2_MYB	2.2679	-369	-364
Pm012969	Myb_box4_MYB	2.1501	-78	-72
Pm012969	Myb_box4_MYB	2.1501	-113	-107
Pm012969	DREB_AP2_EREBP	2.973	-939	-934
Pm012969	W_box_WRKY	1.9356	-179	-174
Pm012969	Myb_box1_MYB	1.8965	-584	-579
Pm012969	Nac_box_NAC	2.5944	-876	-871
Gene	TF_Name	Z-Score	Start	End
Pm012995	W_box_WRKY	2.5841	-428	-423
Pm012995	AuxRE_ARF	3.0855	-767	-762
Pm012995	Myb_box5_MYB	2.4558	-408	-403
Pm012995	Myb_box5_MYB	2.4558	-406	-401
Pm012995	Myb_box5_MYB	2.4558	-404	-399
Pm012995	Myb_box5_MYB	2.4558	-908	-903
Pm012995	Nac_box_NAC	3.0977	-206	-201
Gene	TF_Name	Z-Score	Start	End
Pm013049	Myb_box5_MYB	2.6537	-293	-288
Pm013049	Myb_box2_MYB	2.5009	-208	-203
Pm013049	Myb_box2_MYB	2.5009	-57	-52
Pm013049	Myb_box2_MYB	2.5009	-23	-18
Pm013049	Myb_box2_MYB	2.5009	-942	-937
Pm013049	Myb_box1_MYB	1.9548	-980	-975
Pm013049	Myb_box1_MYB	1.9548	-529	-524
Pm013049	Myb_box1_MYB	1.9548	-413	-408
Pm013049	DREB_AP2_EREBP	2.536	-975	-970
Pm013049	Nac_box_NAC	2.6222	-313	-308
Pm013049	AuxRE_ARF	2.4893	-550	-545
Pm013049	G_box_bHLH	3.1664	-925	-920
Gene	TF_Name	Z-Score	Start	End
Pm013243	Myb_box2_MYB	2.7384	-641	-636
Pm013243	Myb_box5_MYB	2.0208	-426	-421
Pm013243	Myb_box5_MYB	2.0208	-384	-379
Pm013243	Myb_box5_MYB	2.0208	-635	-630
Pm013243	Myb_box5_MYB	2.0208	-738	-733
Pm013243	Myb_box5_MYB	2.0208	-263	-258
Pm013243	Myb_box5_MYB	2.0208	-640	-635
Pm013243	Myb_box5_MYB	2.0208	-419	-414
Pm013243	Myb_box5_MYB	2.0208	-421	-416
Pm013243	Myb_box5_MYB	2.0208	-222	-217
Pm013243	Myb_box5_MYB	2.0208	-331	-326
Pm013243	G_box_bHLH	3.3734	-178	-173
Pm013243	W_box_WRKY	2.2161	-505	-500
Pm013243	Myb_box1_MYB	2.177	-263	-258
Pm013243	Myb_box3_MYB	2.1669	-213	-208
Pm013243	Myb_box3_MYB	2.1669	-669	-664
Gene	TF_Name	Z-Score	Start	End
Pm013382	G_box_bHLH	2.6624	-797	-792
Pm013382	Myb_box2_MYB	2.3479	-849	-844
Pm013382	Myb_box5_MYB	1.5926	-950	-945
Pm013382	Myb_box1_MYB	1.7102	-950	-945
Pm013382	C_ABRE_bZIP	3.0955	-448	-443
Pm013382	W_box_WRKY	1.8811	-324	-319
Pm013382	G_box2_bZIP	1.7659	-564	-559
Pm013382	G_box2_bZIP	1.7659	-541	-536
Gene	TF_Name	Z-Score	Start	End
Pm013603	Myb_box4_MYB	2.5233	-641	-635
Pm013603	Myb_box1_MYB	2.0332	-445	-440
Pm013603	Myb_box2_MYB	2.6129	-198	-193
Pm013603	Myb_box5_MYB	1.8519	-34	-29
Pm013603	Myb_box5_MYB	1.8519	-445	-440
Pm013603	N_box_bHLH	2.5357	-124	-119
Pm013603	G_box_bHLH	3.2152	-526	-521
Gene	TF_Name	Z-Score	Start	End
Pm013874	Myb_box5_MYB	1.9222	-471	-466
Pm013874	Myb_box5_MYB	1.9222	-310	-305
Pm013874	Myb_box5_MYB	1.9222	-364	-359
Pm013874	Myb_box5_MYB	1.9222	-308	-303
Pm013874	GCC_box_AP2_EREBP	4.2342	-739	-734
Pm013874	Myb_box3_MYB	2.0617	-595	-590
Pm013874	W_box_WRKY	2.2391	-635	-630
Pm013874	Myb_box1_MYB	2.0509	-310	-305
Gene	TF_Name	Z-Score	Start	End
Pm014573	AuxRE_ARF	2.7786	-583	-578
Pm014573	Myb_box4_MYB	2.8646	-83	-77
Pm014573	G_box2_bZIP	2.1443	-34	-29
Pm014573	Myb_box1_MYB	2.918	-727	-722
Pm014573	N_box_bHLH	2.781	-201	-196
Pm014573	DREB_AP2_EREBP	2.7832	-573	-568
Pm014573	HSE1_HSF	1.5192	-512	-505
Pm014573	Myb_box5_MYB	2.9147	-727	-722
Gene	TF_Name	Z-Score	Start	End
Pm014611	Myb_box5_MYB	2.1013	-201	-196
Pm014611	G_box_bHLH	3.3973	-123	-118
Pm014611	Nac_box_NAC	2.8066	-542	-537
Gene	TF_Name	Z-Score	Start	End
Pm014824	Myb_box1_MYB	2.9825	-440	-435
Pm014824	Myb_box5_MYB	2.8964	-442	-437
Pm014824	Myb_box5_MYB	2.8964	-440	-435
Pm014824	Nac_box_NAC	2.8531	-705	-700
Pm014824	Myb_box2_MYB	2.7808	-578	-573
Gene	TF_Name	Z-Score	Start	End
Pm014831	DREB_AP2_EREBP	2.8645	-31	-26
Pm014831	W_box_WRKY	2.4475	-813	-808
Pm014831	W_box_WRKY	2.4475	-321	-316
Pm014831	Myb_box1_MYB	2.291	-308	-303
Pm014831	Myb_box5_MYB	2.1808	-308	-303
Pm014831	Myb_box5_MYB	2.1808	-830	-825
Gene	TF_Name	Z-Score	Start	End
Pm014841	Myb_box5_MYB	2.7444	-789	-784
Pm014841	Myb_box1_MYB	2.8042	-789	-784
Pm014841	N_box_bHLH	2.6309	-48	-43
Pm014841	N_box_bHLH	2.6309	-336	-331
Pm014841	AuxRE_ARF	2.7154	-906	-901
Pm014841	DREB_AP2_EREBP	3.3236	-358	-353
Pm014841	Myb_box2_MYB	2.7173	-528	-523
Pm014841	G_box2_bZIP	2.1006	-196	-191
Pm014841	G_ABRE_bZIP	3.054	-668	-661
Gene	TF_Name	Z-Score	Start	End
Pm014882	G_box2_bZIP	2.3185	-754	-749
Pm014882	W_box_WRKY	1.6917	-63	-58
Pm014882	W_box_WRKY	1.6917	-433	-428
Pm014882	HBE_HB	1.6946	-284	-276
Pm014882	Myb_box5_MYB	2.1493	-160	-155
Pm014882	N_box_bHLH	2.8227	-533	-528
Gene	TF_Name	Z-Score	Start	End
Pm014937	AuxRE_ARF	2.924	-951	-946
Pm014937	AuxRE_ARF	2.924	-421	-416
Pm014937	W_box_WRKY	1.6121	-78	-73
Pm014937	G_box2_bZIP	2.4196	-144	-139
Gene	TF_Name	Z-Score	Start	End
Pm014948	Myb_box1_MYB	2.0234	-269	-264
Pm014948	Myb_box1_MYB	2.0234	-267	-262
Pm014948	Myb_box3_MYB	2.0091	-748	-743
Pm014948	Myb_box5_MYB	2.7561	-684	-679
Gene	TF_Name	Z-Score	Start	End
Pm014953	Myb_box4_MYB	2.224	-294	-288
Pm014953	AuxRE_ARF	2.3382	-199	-194
Pm014953	Nac_box_NAC	2.4678	-959	-954
Pm014953	GCC_box_AP2_EREBP	3.6605	-396	-391
Pm014953	G_box2_bZIP	1.8388	-760	-755
Pm014953	Myb_box3_MYB	1.8432	-381	-376
Pm014953	Myb_box2_MYB	2.287	-144	-139
Pm014953	Myb_box2_MYB	2.287	-242	-237
Pm014953	Myb_box2_MYB	2.287	-121	-116
Pm014953	Myb_box5_MYB	1.6982	-256	-251
Pm014953	Myb_box5_MYB	1.6982	-120	-115
Gene	TF_Name	Z-Score	Start	End
Pm015262	Nac_box_NAC	2.9889	-567	-562
Pm015262	Nac_box_NAC	2.9889	-846	-841
Pm015262	Nac_box_NAC	2.9889	-660	-655
Pm015262	Nac_box_NAC	2.9889	-474	-469
Pm015262	Nac_box_NAC	2.9889	-753	-748
Pm015262	Nac_box_NAC	2.9889	-939	-934
Pm015262	Myb_box3_MYB	2.3335	-8	-3
Pm015262	HSE1_HSF	1.7686	-400	-393
Pm015262	Myb_box1_MYB	1.5326	-8	-3
Gene	TF_Name	Z-Score	Start	End
Pm015277	Myb_box5_MYB	2.1469	-44	-39
Pm015277	Myb_box5_MYB	2.1469	-711	-706
Pm015277	Myb_box5_MYB	2.1469	-880	-875
Pm015277	HBE_HB	2.2261	-853	-845
Pm015277	Myb_box1_MYB	2.2388	-880	-875
Pm015277	Myb_box1_MYB	2.2388	-711	-706
Pm015277	Myb_box4_MYB	2.8606	-366	-360
Pm015277	W_box_WRKY	1.5173	-620	-615
Pm015277	Nac_box_NAC	2.8487	-195	-190
Gene	TF_Name	Z-Score	Start	End
Pm015415	AuxRE_ARF	2.8064	-861	-856
Pm015415	Nac_box_NAC	2.8572	-695	-690
Pm015415	Myb_box5_MYB	2.9555	-546	-541
Pm015415	Myb_box1_MYB	2.2252	-836	-831
Pm015415	Myb_box1_MYB	2.2252	-267	-262
Pm015415	Myb_box1_MYB	2.2252	-870	-865
Pm015415	W_box_WRKY	2.2448	-417	-412
Pm015415	G_box2_bZIP	2.2096	-445	-440
Pm015415	Myb_box4_MYB	2.8851	-122	-116
Gene	TF_Name	Z-Score	Start	End
Pm015448	Myb_box5_MYB	2.0468	-873	-868
Pm015448	Myb_box5_MYB	2.0468	-702	-697
Pm015448	GCC_box_AP2_EREBP	4.4642	-56	-51
Pm015448	DREB_AP2_EREBP	2.7712	-68	-63
Pm015448	N_box_bHLH	2.7736	-639	-634
Pm015448	AuxRE_ARF	2.763	-475	-470
Pm015448	W_box_WRKY	2.2359	-740	-735
Pm015448	Nac_box_NAC	2.8142	-968	-963
Gene	TF_Name	Z-Score	Start	End
Pm015625	G_box2_bZIP	2.0868	-44	-39
Pm015625	W_box_WRKY	2.1062	-471	-466
Pm015625	W_box_WRKY	2.1062	-479	-474
Pm015625	Myb_box5_MYB	1.9023	-255	-250
Pm015625	Myb_box2_MYB	2.5017	-629	-624
Pm015625	Myb_box2_MYB	2.5017	-625	-620
Pm015625	Myb_box2_MYB	2.5017	-496	-491
Gene	TF_Name	Z-Score	Start	End
Pm015673	AuxRE_ARF	2.6426	-213	-208
Pm015673	Myb_box5_MYB	1.8987	-78	-73
Pm015673	Myb_box5_MYB	1.8987	-944	-939
Pm015673	Myb_box5_MYB	1.8987	-942	-937
Pm015673	Myb_box3_MYB	2.0263	-677	-672
Pm015673	Myb_box4_MYB	2.6563	-364	-358
Gene	TF_Name	Z-Score	Start	End
Pm015739	W_box_WRKY	1.7672	-946	-941
Pm015739	Myb_box1_MYB	2.3885	-322	-317
Pm015739	AuxRE_ARF	2.2749	-727	-722
Pm015739	AuxRE_ARF	2.2749	-224	-219
Pm015739	AuxRE_ARF	2.2749	-997	-992
Pm015739	Nac_box_NAC	2.3516	-672	-667
Pm015739	Nac_box_NAC	2.3516	-924	-919
Pm015739	N_box_bHLH	2.8388	-472	-467
Pm015739	N_box_bHLH	2.8388	-547	-542
Pm015739	Myb_box5_MYB	2.3121	-322	-317
Gene	TF_Name	Z-Score	Start	End
Pm015851	C_ABRE_bZIP	3.8866	-644	-639
Pm015851	AuxRE_ARF	2.7987	-489	-484
Pm015851	AuxRE_ARF	2.7987	-411	-406
Pm015851	Myb_box3_MYB	2.1591	-773	-768
Pm015851	DREB_AP2_EREBP	3.4652	-707	-702
Pm015851	Myb_box2_MYB	2.9607	-100	-95
Pm015851	HSE1_HSF	1.6419	-397	-390
Pm015851	Myb_box1_MYB	2.9249	-659	-654
Pm015851	Myb_box5_MYB	2.9105	-659	-654
Pm015851	G_box_bHLH	3.3537	-560	-555
Pm015851	Nac_box_NAC	2.7705	-528	-523
Pm015851	Nac_box_NAC	2.7705	-380	-375
Pm015851	Nac_box_NAC	2.7705	-418	-413
Pm015851	W_box_WRKY	1.5221	-713	-708
Pm015851	W_box_WRKY	1.5221	-432	-427
Gene	TF_Name	Z-Score	Start	End
Pm015860	G_box2_bZIP	2.9122	-524	-519
Pm015860	AuxRE_ARF	2.6344	-343	-338
Pm015860	AuxRE_ARF	2.6344	-77	-72
Pm015860	AuxRE_ARF	2.6344	-497	-492
Gene	TF_Name	Z-Score	Start	End
Pm015971	C_ABRE_bZIP	3.0146	-936	-931
Pm015971	G_box2_bZIP	1.631	-889	-884
Pm015971	Myb_box2_MYB	2.3431	-300	-295
Pm015971	G_box1_bZIP	3.1472	-1000	-993
Pm015971	G_box_bHLH	2.638	-164	-159
Pm015971	G_box_bHLH	2.638	-999	-994
Pm015971	G_ABRE_bZIP	2.8313	-999	-992
Pm015971	Myb_box3_MYB	1.6605	-958	-953
Pm015971	DREB_AP2_EREBP	2.1253	-546	-541
Pm015971	Myb_box5_MYB	1.5424	-230	-225
Pm015971	Myb_box5_MYB	1.5424	-852	-847
Gene	TF_Name	Z-Score	Start	End
Pm015983	W_box_WRKY	2.1629	-258	-253
Pm015983	Nac_box_NAC	2.7843	-223	-218
Pm015983	Myb_box4_MYB	2.6391	-49	-43
Pm015983	DREB_AP2_EREBP	2.7655	-52	-47
Pm015983	G_box2_bZIP	2.1505	-410	-405
Pm015983	G_box2_bZIP	2.1505	-453	-448
Pm015983	G_box2_bZIP	2.1505	-196	-191
Gene	TF_Name	Z-Score	Start	End
Pm018236	N_box_bHLH	3.3217	-515	-510
Pm018236	Myb_box3_MYB	2.1204	-378	-373
Gene	TF_Name	Z-Score	Start	End
Pm018317	Myb_box1_MYB	2.1775	-247	-242
Pm018317	Myb_box5_MYB	2.031	-439	-434
Pm018317	Myb_box5_MYB	2.031	-247	-242
Pm018317	W_box_WRKY	2.1576	-892	-887
Pm018317	Myb_box4_MYB	2.5602	-382	-376
Pm018317	Myb_box4_MYB	2.5602	-44	-38
Pm018317	G_box_bHLH	3.3264	-368	-363
Pm018317	Myb_box2_MYB	2.6352	-550	-545
Gene	TF_Name	Z-Score	Start	End
Pm018358	Myb_box1_MYB	2.8172	-537	-532
Pm018358	DREB_AP2_EREBP	2.6052	-427	-422
Pm018358	Myb_box5_MYB	2.7014	-537	-532
Pm018358	N_box_bHLH	2.6106	-617	-612
Pm018358	W_box_WRKY	2.1595	-103	-98
Gene	TF_Name	Z-Score	Start	End
Pm018383	Myb_box5_MYB	2.1029	-439	-434
Pm018383	Myb_box5_MYB	2.1029	-441	-436
Pm018383	Myb_box3_MYB	2.1414	-756	-751
Pm018383	Myb_box3_MYB	2.1414	-284	-279
Pm018383	Myb_box3_MYB	2.1414	-466	-461
Pm018383	W_box_WRKY	2.1814	-562	-557
Gene	TF_Name	Z-Score	Start	End
Pm018401	Myb_box2_MYB	2.7955	-444	-439
Pm018401	Myb_box1_MYB	2.2915	-1000	-995
Pm018401	AuxRE_ARF	2.6431	-480	-475
Pm018401	DREB_AP2_EREBP	2.967	-200	-195
Pm018401	N_box_bHLH	2.9423	-560	-555
Pm018401	Myb_box5_MYB	3.0643	-998	-993
Gene	TF_Name	Z-Score	Start	End
Pm018437	Myb_box4_MYB	2.3778	-160	-154
Pm018437	Myb_box2_MYB	2.443	-366	-361
Pm018437	Myb_box2_MYB	2.443	-98	-93
Pm018437	Myb_box2_MYB	2.443	-343	-338
Pm018437	Myb_box2_MYB	2.443	-913	-908
Pm018437	Myb_box1_MYB	1.9835	-976	-971
Pm018437	Nac_box_NAC	2.6737	-391	-386
Pm018437	Nac_box_NAC	2.6737	-398	-393
Pm018437	G_box2_bZIP	1.9867	-947	-942
Pm018437	Myb_box5_MYB	1.8314	-976	-971
Pm018437	Myb_box5_MYB	1.8314	-912	-907
Pm018437	Myb_box5_MYB	1.8314	-937	-932
Gene	TF_Name	Z-Score	Start	End
Pm018656	Myb_box2_MYB	2.3465	-444	-439
Pm018656	G_box2_bZIP	2.2304	-637	-632
Pm018656	Myb_box1_MYB	2.3134	-616	-611
Pm018656	Myb_box5_MYB	2.2893	-616	-611
Pm018656	GCC_box_AP2_EREBP	3.4589	-584	-579
Pm018656	DREB_AP2_EREBP	2.1444	-162	-157
Pm018656	G_box_bHLH	2.6495	-392	-387
Pm018656	G_box_bHLH	2.6495	-579	-574
Pm018656	G_box_bHLH	2.6495	-167	-162
Pm018656	G_box1_bZIP	3.1806	-580	-573
Pm018656	G_ABRE_bZIP	2.8535	-169	-162
Gene	TF_Name	Z-Score	Start	End
Pm018968	Myb_box5_MYB	1.9472	-301	-296
Pm018968	AuxRE_ARF	2.5217	-59	-54
Pm018968	AuxRE_ARF	2.5217	-544	-539
Pm018968	AuxRE_ARF	2.5217	-113	-108
Pm018968	G_box2_bZIP	2.0016	-458	-453
Pm018968	G_box2_bZIP	2.0016	-484	-479
Pm018968	Myb_box1_MYB	2.03	-301	-296
Pm018968	Myb_box3_MYB	2.0093	-570	-565
Pm018968	Myb_box3_MYB	2.0093	-794	-789
Pm018968	Myb_box3_MYB	2.0093	-974	-969
Pm018968	N_box_bHLH	3.2552	-451	-446
Gene	TF_Name	Z-Score	Start	End
Pm018989	Myb_box5_MYB	1.7793	-727	-722
Pm018989	G_box_bHLH	3.074	-946	-941
Pm018989	AuxRE_ARF	2.4796	-98	-93
Pm018989	G_box2_bZIP	2.5814	-329	-324
Pm018989	N_box_bHLH	2.4079	-916	-911
Pm018989	DREB_AP2_EREBP	3.052	-137	-132
Gene	TF_Name	Z-Score	Start	End
Pm018996	GCC_box_AP2_EREBP	3.8705	-510	-505
Pm018996	Myb_box1_MYB	1.8569	-738	-733
Pm018996	Myb_box2_MYB	2.3806	-39	-34
Pm018996	G_box_bHLH	3.0109	-183	-178
Pm018996	Myb_box5_MYB	1.7085	-70	-65
Pm018996	Myb_box5_MYB	1.7085	-332	-327
Pm018996	Myb_box5_MYB	1.7085	-738	-733
Pm018996	Myb_box4_MYB	2.2394	-729	-723
Gene	TF_Name	Z-Score	Start	End
Pm019065	Myb_box3_MYB	2.1185	-526	-521
Pm019065	HSE1_HSF	1.5444	-156	-149
Pm019065	Myb_box5_MYB	2.0428	-699	-694
Pm019065	Myb_box5_MYB	2.0428	-376	-371
Pm019065	Myb_box5_MYB	2.0428	-564	-559
Pm019065	Myb_box5_MYB	2.0428	-383	-378
Pm019065	HBE_HB	2.1464	-819	-811
Pm019065	Nac_box_NAC	2.8144	-79	-74
Gene	TF_Name	Z-Score	Start	End
Pm019069	G_box_bHLH	2.9456	-753	-748
Pm019069	Myb_box3_MYB	1.7398	-368	-363
Pm019069	Myb_box5_MYB	2.374	-910	-905
Pm019069	AuxRE_ARF	2.3464	-462	-457
Pm019069	GCC_box_AP2_EREBP	3.8362	-231	-226
Pm019069	Myb_box1_MYB	1.7306	-346	-341
Gene	TF_Name	Z-Score	Start	End
Pm019385	W_box_WRKY	2.0083	-716	-711
Pm019385	Myb_box1_MYB	1.8965	-163	-158
Pm019385	Myb_box1_MYB	1.8965	-582	-577
Pm019385	Myb_box1_MYB	1.8965	-969	-964
Pm019385	C_ABRE_bZIP	3.4419	-313	-308
Pm019385	Myb_box5_MYB	1.7631	-163	-158
Pm019385	Myb_box5_MYB	1.7631	-582	-577
Pm019385	Myb_box5_MYB	1.7631	-732	-727
Pm019385	Myb_box5_MYB	1.7631	-969	-964
Gene	TF_Name	Z-Score	Start	End
Pm019411	Myb_box5_MYB	1.7126	-44	-39
Pm019411	Myb_box5_MYB	1.7126	-169	-164
Pm019411	Myb_box1_MYB	1.8453	-44	-39
Pm019411	DREB_AP2_EREBP	2.4067	-736	-731
Pm019411	G_box_bHLH	3.0585	-471	-466
Pm019411	N_box_bHLH	3.0559	-732	-727
Pm019411	Myb_box2_MYB	2.3409	-882	-877
Gene	TF_Name	Z-Score	Start	End
Pm019416	Myb_box2_MYB	2.799	-96	-91
Pm019416	Myb_box2_MYB	2.799	-956	-951
Pm019416	C_ABRE_bZIP	3.8851	-754	-749
Pm019416	AuxRE_ARF	2.7227	-928	-923
Pm019416	Myb_box5_MYB	2.8736	-507	-502
Pm019416	HSE1_HSF	1.6397	-208	-201
Pm019416	Myb_box1_MYB	2.1914	-881	-876
Gene	TF_Name	Z-Score	Start	End
Pm019422	DREB_AP2_EREBP	2.4276	-855	-850
Pm019422	Myb_box5_MYB	1.7506	-39	-34
Pm019422	Myb_box3_MYB	1.8519	-706	-701
Pm019422	Myb_box3_MYB	1.8519	-277	-272
Pm019422	Myb_box2_MYB	2.4509	-185	-180
Pm019422	G_box2_bZIP	2.5337	-405	-400
Gene	TF_Name	Z-Score	Start	End
Pm019427	DREB_AP2_EREBP	3.5284	-91	-86
Pm019427	W_box_WRKY	1.5533	-666	-661
Pm019427	W_box_WRKY	1.5533	-757	-752
Pm019427	Nac_box_NAC	2.846	-650	-645
Gene	TF_Name	Z-Score	Start	End
Pm020153	Myb_box3_MYB	2.2081	-901	-896
Pm020153	Myb_box3_MYB	2.2081	-301	-296
Pm020153	Myb_box3_MYB	2.2081	-682	-677
Pm020153	Myb_box5_MYB	2.0657	-815	-810
Pm020153	Myb_box5_MYB	2.0657	-20	-15
Pm020153	Myb_box5_MYB	2.0657	-587	-582
Pm020153	Myb_box5_MYB	2.0657	-12	-7
Pm020153	Myb_box5_MYB	2.0657	-482	-477
Pm020153	Myb_box1_MYB	2.2241	-815	-810
Pm020153	Myb_box1_MYB	2.2241	-587	-582
Pm020153	DREB_AP2_EREBP	2.793	-76	-71
Pm020153	Myb_box2_MYB	2.706	-13	-8
Pm020153	Myb_box2_MYB	2.706	-17	-12
Gene	TF_Name	Z-Score	Start	End
Pm020198	Nac_box_NAC	2.7593	-743	-738
Pm020198	Nac_box_NAC	2.7593	-740	-735
Pm020198	DREB_AP2_EREBP	2.7255	-732	-727
Pm020198	Myb_box5_MYB	2.8142	-730	-725
Pm020198	Myb_box1_MYB	2.1468	-150	-145
Pm020198	Myb_box1_MYB	2.1468	-229	-224
Gene	TF_Name	Z-Score	Start	End
Pm020271	Myb_box1_MYB	2.2696	-521	-516
Pm020271	Myb_box4_MYB	3.0428	-381	-375
Pm020271	Myb_box5_MYB	2.1866	-521	-516
Pm020271	Myb_box5_MYB	2.1866	-965	-960
Pm020271	Myb_box5_MYB	2.1866	-963	-958
Pm020271	W_box_WRKY	1.5219	-228	-223
Pm020271	W_box_WRKY	1.5219	-186	-181
Pm020271	W_box_WRKY	1.5219	-281	-276
Pm020271	AuxRE_ARF	2.9097	-58	-53
Pm020271	DREB_AP2_EREBP	2.8724	-536	-531
Pm020271	C_ABRE_bZIP	3.9515	-510	-505
Gene	TF_Name	Z-Score	Start	End
Pm020299	Nac_box_NAC	2.8377	-169	-164
Pm020299	HSE1_HSF	1.6557	-453	-446
Pm020299	Myb_box5_MYB	2.0654	-379	-374
Pm020299	Myb_box5_MYB	2.0654	-556	-551
Pm020299	Myb_box5_MYB	2.0654	-356	-351
Pm020299	Myb_box5_MYB	2.0654	-761	-756
Pm020299	Myb_box3_MYB	2.1531	-520	-515
Gene	TF_Name	Z-Score	Start	End
Pm020303	Myb_box3_MYB	2.2221	-161	-156
Pm020303	Myb_box3_MYB	2.2221	-610	-605
Pm020303	HSE1_HSF	1.6663	-274	-267
Pm020303	Nac_box_NAC	2.8441	-652	-647
Pm020303	DREB_AP2_EREBP	2.8826	-13	-8
Pm020303	Myb_box2_MYB	2.9478	-10	-5
Pm020303	G_box2_bZIP	2.2351	-790	-785
Pm020303	Myb_box1_MYB	2.2481	-692	-687
Pm020303	G_box_bHLH	3.4646	-221	-216
Pm020303	Myb_box5_MYB	2.1554	-60	-55
Pm020303	Myb_box5_MYB	2.1554	-692	-687
Gene	TF_Name	Z-Score	Start	End
Pm020535	Myb_box1_MYB	1.5992	-326	-321
Pm020535	Myb_box5_MYB	2.323	-88	-83
Pm020535	G_box2_bZIP	2.3296	-949	-944
Pm020535	HBE_HB	1.6193	-915	-907
Pm020535	Myb_box3_MYB	2.3134	-326	-321
Gene	TF_Name	Z-Score	Start	End
Pm020604	G_box_bHLH	3.1687	-477	-472
Pm020604	G_box_bHLH	3.1687	-291	-286
Pm020604	Myb_box5_MYB	2.5987	-417	-412
Pm020604	Myb_box5_MYB	2.5987	-63	-58
Pm020604	Myb_box5_MYB	2.5987	-368	-363
Pm020604	Myb_box5_MYB	2.5987	-493	-488
Pm020604	Myb_box5_MYB	2.5987	-415	-410
Pm020604	C_ABRE_bZIP	3.7157	-288	-283
Pm020604	Myb_box1_MYB	2.7393	-63	-58
Pm020604	Myb_box1_MYB	2.7393	-368	-363
Pm020604	N_box_bHLH	3.1246	-66	-61
Pm020604	N_box_bHLH	3.1246	-371	-366
Pm020604	Myb_box4_MYB	2.4486	-36	-30
Pm020604	Myb_box2_MYB	2.5545	-8	-3
Pm020604	Myb_box2_MYB	2.5545	-416	-411
Pm020604	GCC_box_AP2_EREBP	3.9627	-312	-307
Pm020604	GCC_box_AP2_EREBP	3.9627	-314	-309
Pm020604	GCC_box_AP2_EREBP	3.9627	-311	-306
Pm020604	DREB_AP2_EREBP	2.5113	-495	-490
Pm020604	DREB_AP2_EREBP	2.5113	-413	-408
Pm020604	W_box_WRKY	2.1479	-297	-292
Gene	TF_Name	Z-Score	Start	End
Pm020616	Nac_box_NAC	2.7292	-978	-973
Pm020616	Nac_box_NAC	2.7292	-865	-860
Pm020616	G_box2_bZIP	2.0721	-680	-675
Pm020616	G_box2_bZIP	2.0721	-685	-680
Pm020616	GCC_box_AP2_EREBP	4.2174	-992	-987
Pm020616	W_box_WRKY	2.1015	-211	-206
Gene	TF_Name	Z-Score	Start	End
Pm020788	Myb_box5_MYB	1.5493	-7	-2
Pm020788	Myb_box5_MYB	1.5493	-45	-40
Pm020788	G_box_bHLH	2.7703	-423	-418
Pm020788	G_box_bHLH	2.7703	-434	-429
Pm020788	G_box_bHLH	2.7703	-580	-575
Pm020788	W_box_WRKY	1.7684	-773	-768
Pm020788	Nac_box_NAC	2.3074	-168	-163
Pm020788	N_box_bHLH	2.1717	-600	-595
Pm020788	N_box_bHLH	2.1717	-163	-158
Pm020788	Myb_box3_MYB	1.698	-960	-955
Pm020788	Myb_box2_MYB	2.3369	-827	-822
Gene	TF_Name	Z-Score	Start	End
Pm020798	Myb_box5_MYB	2.5101	-10	-5
Pm020798	Myb_box4_MYB	2.1978	-521	-515
Pm020798	Myb_box4_MYB	2.1978	-401	-395
Pm020798	Myb_box4_MYB	2.1978	-641	-635
Pm020798	W_box_WRKY	1.9779	-683	-678
Pm020798	W_box_WRKY	1.9779	-156	-151
Pm020798	W_box_WRKY	1.9779	-921	-916
Pm020798	DREB_AP2_EREBP	2.4857	-129	-124
Pm020798	G_box_bHLH	3.2019	-19	-14
Gene	TF_Name	Z-Score	Start	End
Pm020822	Myb_box5_MYB	2.7992	-560	-555
Pm020822	DREB_AP2_EREBP	2.6914	-532	-527
Pm020822	Myb_box2_MYB	2.89	-279	-274
Pm020822	W_box_WRKY	2.2341	-708	-703
Pm020822	W_box_WRKY	2.2341	-73	-68
Pm020822	W_box_WRKY	2.2341	-671	-666
Pm020822	G_box_bHLH	3.38	-251	-246
Pm020822	Myb_box1_MYB	2.8797	-560	-555
Pm020822	N_box_bHLH	3.3732	-395	-390
Pm020822	Nac_box_NAC	2.7931	-891	-886
Gene	TF_Name	Z-Score	Start	End
Pm020860	G_box2_bZIP	1.8969	-499	-494
Pm020860	Myb_box1_MYB	2.5852	-937	-932
Pm020860	Myb_box1_MYB	2.5852	-939	-934
Pm020860	Myb_box4_MYB	2.5809	-772	-766
Pm020860	DREB_AP2_EREBP	3.0113	-677	-672
Pm020860	Myb_box3_MYB	1.9225	-997	-992
Pm020860	Myb_box5_MYB	2.5226	-937	-932
Pm020860	Myb_box5_MYB	2.5226	-939	-934
Gene	TF_Name	Z-Score	Start	End
Pm023291	G_box_bHLH	2.9437	-241	-236
Pm023291	G_box_bHLH	2.9437	-965	-960
Pm023291	G_box_bHLH	2.9437	-264	-259
Pm023291	G_box_bHLH	2.9437	-896	-891
Pm023291	Myb_box2_MYB	2.5092	-304	-299
Pm023291	AuxRE_ARF	2.373	-185	-180
Pm023291	AuxRE_ARF	2.373	-490	-485
Pm023291	Myb_box5_MYB	2.5363	-303	-298
Pm023291	N_box_bHLH	2.4202	-117	-112
Gene	TF_Name	Z-Score	Start	End
Pm023306	G_box2_bZIP	2.1478	-698	-693
Pm023306	Myb_box2_MYB	2.5868	-51	-46
Pm023306	Myb_box1_MYB	2.1483	-87	-82
Pm023306	Myb_box1_MYB	2.1483	-974	-969
Pm023306	Myb_box3_MYB	2.1421	-558	-553
Pm023306	Myb_box5_MYB	1.9812	-87	-82
Pm023306	Myb_box5_MYB	1.9812	-974	-969
Pm023306	Myb_box5_MYB	1.9812	-846	-841
Pm023306	Myb_box5_MYB	1.9812	-685	-680
Pm023306	G_box_bHLH	3.3569	-355	-350
Pm023306	AuxRE_ARF	2.6542	-432	-427
Pm023306	AuxRE_ARF	2.6542	-58	-53
Pm023306	AuxRE_ARF	2.6542	-61	-56
Pm023306	AuxRE_ARF	2.6542	-537	-532
Gene	TF_Name	Z-Score	Start	End
Pm024291	Myb_box2_MYB	3.2122	-7	-2
Pm024291	W_box_WRKY	1.5466	-455	-450
Gene	TF_Name	Z-Score	Start	End
Pm024309	W_box_WRKY	2.2806	-153	-148
Pm024309	W_box_WRKY	2.2806	-393	-388
Pm024309	Myb_box1_MYB	2.2573	-688	-683
Pm024309	N_box_bHLH	2.8164	-432	-427
Pm024309	DREB_AP2_EREBP	2.8248	-79	-74
Pm024309	DREB_AP2_EREBP	2.8248	-396	-391
Pm024309	Myb_box5_MYB	2.0748	-199	-194
Pm024309	Myb_box5_MYB	2.0748	-688	-683
Pm024309	Myb_box5_MYB	2.0748	-419	-414
Pm024309	Myb_box4_MYB	2.7349	-198	-192
Pm024309	Myb_box3_MYB	2.2361	-821	-816
Pm024309	Nac_box_NAC	3.0031	-310	-305
Gene	TF_Name	Z-Score	Start	End
Pm024332	Myb_box5_MYB	2.2321	-539	-534
Pm024332	Myb_box5_MYB	2.2321	-64	-59
Pm024332	Myb_box5_MYB	2.2321	-228	-223
Pm024332	Myb_box5_MYB	2.2321	-44	-39
Pm024332	Myb_box5_MYB	2.2321	-82	-77
Pm024332	W_box_WRKY	2.4078	-495	-490
Pm024332	W_box_WRKY	2.4078	-357	-352
Pm024332	Myb_box1_MYB	1.5958	-640	-635
Pm024332	Myb_box2_MYB	3.1057	-63	-58
Pm024332	Myb_box3_MYB	2.3108	-640	-635
Gene	TF_Name	Z-Score	Start	End
Pm024357	N_box_bHLH	2.7928	-131	-126
Pm024357	Myb_box5_MYB	2.0754	-568	-563
Pm024357	Myb_box5_MYB	2.0754	-574	-569
Pm024357	Myb_box5_MYB	2.0754	-570	-565
Pm024357	Myb_box5_MYB	2.0754	-281	-276
Pm024357	Myb_box5_MYB	2.0754	-761	-756
Pm024357	Myb_box5_MYB	2.0754	-572	-567
Pm024357	Myb_box2_MYB	2.9488	-573	-568
Pm024357	Myb_box2_MYB	2.9488	-569	-564
Pm024357	Myb_box3_MYB	2.1581	-542	-537
Pm024357	W_box_WRKY	1.5049	-415	-410
Gene	TF_Name	Z-Score	Start	End
Pm024604	HSE1_HSF	1.5682	-435	-428
Pm024604	G_box2_bZIP	2.8824	-503	-498
Pm024604	Myb_box5_MYB	2.0428	-977	-972
Gene	TF_Name	Z-Score	Start	End
Pm025092	AuxRE_ARF	2.6267	-619	-614
Pm025092	AuxRE_ARF	2.6267	-610	-605
Gene	TF_Name	Z-Score	Start	End
Pm025136	N_box_bHLH	2.6632	-634	-629
Pm025136	AuxRE_ARF	2.1156	-910	-905
Pm025136	Nac_box_NAC	2.1074	-558	-553
Pm025136	W_box_WRKY	1.6155	-20	-15
Pm025136	Myb_box2_MYB	2.2017	-263	-258
Pm025136	DREB_AP2_EREBP	2.6667	-571	-566
Pm025136	C_ABRE_bZIP	3.0338	-323	-318
Pm025136	G_box2_bZIP	2.1632	-163	-158
Gene	TF_Name	Z-Score	Start	End
Pm025865	Myb_box1_MYB	2.8889	-192	-187
Pm025865	DREB_AP2_EREBP	2.6671	-906	-901
Pm025865	DREB_AP2_EREBP	2.6671	-365	-360
Pm025865	AuxRE_ARF	2.7642	-479	-474
Pm025865	Myb_box3_MYB	2.1557	-691	-686
Pm025865	Myb_box3_MYB	2.1557	-888	-883
Pm025865	Myb_box5_MYB	2.7451	-192	-187
Gene	TF_Name	Z-Score	Start	End
Pm025902	G_box2_bZIP	2.1007	-939	-934
Pm025902	AuxRE_ARF	2.6333	-334	-329
Pm025902	AuxRE_ARF	2.6333	-645	-640
Pm025902	Myb_box5_MYB	2.0642	-12	-7
Pm025902	Myb_box5_MYB	2.0642	-321	-316
Pm025902	Myb_box4_MYB	2.7593	-411	-405
Gene	TF_Name	Z-Score	Start	End
Pm025987	G_box_bHLH	3.1552	-347	-342
Pm025987	Myb_box2_MYB	2.5246	-635	-630
Pm025987	Myb_box4_MYB	2.4379	-218	-212
Pm025987	Myb_box5_MYB	1.8139	-519	-514
Pm025987	Myb_box5_MYB	1.8139	-326	-321
Pm025987	Myb_box5_MYB	1.8139	-292	-287
Pm025987	N_box_bHLH	2.515	-229	-224
Pm025987	AuxRE_ARF	2.4571	-181	-176
Pm025987	W_box_WRKY	1.9623	-377	-372
Pm025987	W_box_WRKY	1.9623	-939	-934
Pm025987	Myb_box1_MYB	1.9516	-326	-321
Gene	TF_Name	Z-Score	Start	End
Pm026239	G_box2_bZIP	1.8078	-579	-574
Pm026239	Myb_box5_MYB	1.679	-741	-736
Pm026239	Myb_box5_MYB	1.679	-68	-63
Pm026239	Myb_box4_MYB	2.4331	-422	-416
Pm026239	Myb_box3_MYB	1.7982	-768	-763
Pm026239	Myb_box3_MYB	1.7982	-429	-424
Pm026239	C_ABRE_bZIP	3.2392	-367	-362
Gene	TF_Name	Z-Score	Start	End
Pm026258	G_box2_bZIP	2.2429	-829	-824
Pm026258	AuxRE_ARF	2.9317	-217	-212
Pm026258	Myb_box5_MYB	2.1399	-658	-653
Pm026258	Myb_box5_MYB	2.1399	-896	-891
Pm026258	Myb_box5_MYB	2.1399	-656	-651
Pm026258	Myb_box5_MYB	2.1399	-785	-780
Pm026258	Nac_box_NAC	2.8471	-162	-157
Pm026258	Myb_box1_MYB	2.2346	-656	-651
Gene	TF_Name	Z-Score	Start	End
Pm026264	Myb_box2_MYB	2.6085	-221	-216
Pm026264	Myb_box3_MYB	2.0374	-611	-606
Pm026264	Myb_box5_MYB	1.9476	-282	-277
Pm026264	Myb_box5_MYB	1.9476	-783	-778
Gene	TF_Name	Z-Score	Start	End
Pm026282	Nac_box_NAC	2.9675	-930	-925
Pm026282	Myb_box2_MYB	3.0213	-663	-658
Pm026282	G_box_bHLH	3.5854	-408	-403
Pm026282	W_box_WRKY	2.3757	-111	-106
Gene	TF_Name	Z-Score	Start	End
Pm026294	Myb_box1_MYB	2.808	-478	-473
Pm026294	Myb_box2_MYB	2.6456	-520	-515
Pm026294	Myb_box3_MYB	2.0394	-235	-230
Pm026294	Myb_box5_MYB	2.7614	-478	-473
Pm026294	AuxRE_ARF	2.505	-12	-7
Pm026294	W_box_WRKY	2.0523	-871	-866
Pm026294	DREB_AP2_EREBP	3.3062	-626	-621
Pm026294	Nac_box_NAC	2.6447	-890	-885
Pm026294	Nac_box_NAC	2.6447	-119	-114
Gene	TF_Name	Z-Score	Start	End
Pm026296	AuxRE_ARF	2.9613	-442	-437
Pm026296	W_box_WRKY	2.351	-983	-978
Pm026296	Myb_box5_MYB	2.18	-916	-911
Gene	TF_Name	Z-Score	Start	End
Pm026599	Myb_box5_MYB	2.6775	-418	-413
Pm026599	G_box_bHLH	3.2491	-806	-801
Pm026599	N_box_bHLH	2.6174	-785	-780
Pm026599	W_box_WRKY	2.0924	-140	-135
Pm026599	W_box_WRKY	2.0924	-516	-511
Pm026599	W_box_WRKY	2.0924	-627	-622
Pm026599	Myb_box3_MYB	2.0456	-683	-678
Pm026599	Myb_box3_MYB	2.0456	-946	-941
Pm026599	Myb_box1_MYB	2.795	-418	-413
Pm026599	Nac_box_NAC	2.7552	-278	-273
Gene	TF_Name	Z-Score	Start	End
Pm026614	Myb_box5_MYB	2.3031	-100	-95
Pm026614	Myb_box5_MYB	2.3031	-47	-42
Pm026614	Myb_box5_MYB	2.3031	-219	-214
Pm026614	Myb_box5_MYB	2.3031	-617	-612
Pm026614	Myb_box5_MYB	2.3031	-747	-742
Pm026614	Myb_box2_MYB	3.2753	-691	-686
Pm026614	AuxRE_ARF	3.0221	-354	-349
Pm026614	Myb_box1_MYB	2.3847	-747	-742
Gene	TF_Name	Z-Score	Start	End
Pm026620	N_box_bHLH	2.7774	-305	-300
Pm026620	Myb_box3_MYB	2.1065	-260	-255
Pm026620	AuxRE_ARF	2.6621	-985	-980
Pm026620	AuxRE_ARF	2.6621	-991	-986
Pm026620	AuxRE_ARF	2.6621	-988	-983
Pm026620	AuxRE_ARF	2.6621	-994	-989
Pm026620	Myb_box5_MYB	2.0437	-7	-2
Pm026620	W_box_WRKY	2.1533	-390	-385
Pm026620	W_box_WRKY	2.1533	-503	-498
Pm026620	W_box_WRKY	2.1533	-930	-925
Pm026620	W_box_WRKY	2.1533	-310	-305
Pm026620	HSE1_HSF	1.5022	-151	-144
Pm026620	G_box2_bZIP	2.1379	-158	-153
Gene	TF_Name	Z-Score	Start	End
Pm026701	Myb_box3_MYB	2.2216	-287	-282
Pm026701	G_box2_bZIP	2.2612	-160	-155
Pm026701	DREB_AP2_EREBP	2.9139	-635	-630
Pm026701	Nac_box_NAC	2.9554	-487	-482
Pm026701	W_box_WRKY	2.2984	-414	-409
Gene	TF_Name	Z-Score	Start	End
Pm026718	W_box_WRKY	2.3559	-384	-379
Pm026718	Myb_box1_MYB	3.092	-739	-734
Pm026718	Myb_box5_MYB	2.9884	-739	-734
Pm026718	Myb_box2_MYB	2.8732	-213	-208
Gene	TF_Name	Z-Score	Start	End
Pm026755	W_box_WRKY	2.3219	-554	-549
Pm026755	Myb_box5_MYB	2.1188	-205	-200
Pm026755	AuxRE_ARF	2.8423	-791	-786
Pm026755	Myb_box3_MYB	2.2112	-99	-94
Pm026755	G_box_bHLH	3.4302	-538	-533
Pm026755	G_box_bHLH	3.4302	-614	-609
Pm026755	G_box2_bZIP	2.9684	-534	-529
Gene	TF_Name	Z-Score	Start	End
Pm026786	Nac_box_NAC	2.694	-736	-731
Pm026786	Myb_box5_MYB	2.8204	-523	-518
Pm026786	AuxRE_ARF	2.6706	-464	-459
Pm026786	DREB_AP2_EREBP	3.3908	-768	-763
Pm026786	G_box_bHLH	3.319	-629	-624
Pm026786	G_box_bHLH	3.319	-921	-916
Pm026786	Myb_box1_MYB	2.8592	-523	-518
Gene	TF_Name	Z-Score	Start	End
Pm026975	Myb_box4_MYB	2.9365	-136	-130
Pm026975	Myb_box4_MYB	2.9365	-344	-338
Pm026975	GCC_box_AP2_EREBP	4.5839	-914	-909
Pm026975	Myb_box3_MYB	2.1928	-535	-530
Pm026975	Myb_box5_MYB	2.1139	-861	-856
Pm026975	Myb_box5_MYB	2.1139	-362	-357
Pm026975	Myb_box5_MYB	2.1139	-122	-117
Pm026975	Myb_box5_MYB	2.1139	-166	-161
Pm026975	Myb_box5_MYB	2.1139	-164	-159
Pm026975	Myb_box1_MYB	2.2068	-861	-856
Pm026975	Myb_box1_MYB	2.2068	-362	-357
Pm026975	Myb_box1_MYB	2.2068	-122	-117
Gene	TF_Name	Z-Score	Start	End
Pm027007	Myb_box1_MYB	3.1186	-327	-322
Pm027007	Nac_box_NAC	2.9787	-838	-833
Pm027007	AuxRE_ARF	2.9117	-995	-990
Pm027007	AuxRE_ARF	2.9117	-937	-932
Pm027007	W_box_WRKY	1.5834	-145	-140
Pm027007	C_ABRE_bZIP	4.2054	-92	-87
Pm027007	Myb_box5_MYB	3.1071	-327	-322
Pm027007	G_box2_bZIP	2.3256	-593	-588
Gene	TF_Name	Z-Score	Start	End
Pm027014	Myb_box2_MYB	3.2238	-974	-969
Pm027014	W_box_WRKY	1.5646	-230	-225
Pm027014	W_box_WRKY	1.5646	-235	-230
Pm027014	W_box_WRKY	1.5646	-529	-524
Gene	TF_Name	Z-Score	Start	End
Pm027079	Nac_box_NAC	2.8255	-879	-874
Pm027079	N_box_bHLH	2.7235	-100	-95
Pm027079	Myb_box5_MYB	2.8144	-235	-230
Pm027079	Myb_box5_MYB	2.8144	-153	-148
Pm027079	Myb_box4_MYB	2.634	-644	-638
Pm027079	Myb_box1_MYB	2.9035	-235	-230
Pm027079	Myb_box1_MYB	2.9035	-153	-148
Gene	TF_Name	Z-Score	Start	End
Pm027081	Myb_box5_MYB	2.7825	-259	-254
Pm027081	Myb_box1_MYB	2.8642	-259	-254
Pm027081	AuxRE_ARF	2.7814	-113	-108
Pm027081	Myb_box4_MYB	2.6878	-711	-705
Pm027081	N_box_bHLH	2.6973	-135	-130
Pm027081	N_box_bHLH	2.6973	-853	-848
Gene	TF_Name	Z-Score	Start	End
Pm027299	N_box_bHLH	2.7098	-443	-438
Pm027299	AuxRE_ARF	2.0953	-41	-36
Pm027299	Myb_box4_MYB	2.2332	-53	-47
Pm027299	Nac_box_NAC	1.9682	-172	-167
Pm027299	Myb_box5_MYB	2.1872	-422	-417
Pm027299	Myb_box1_MYB	2.1371	-422	-417
Gene	TF_Name	Z-Score	Start	End
Pm027308	AuxRE_ARF	2.6259	-537	-532
Pm027308	Myb_box3_MYB	2.1432	-297	-292
Pm027308	Myb_box1_MYB	2.1648	-464	-459
Pm027308	Myb_box1_MYB	2.1648	-925	-920
Pm027308	Myb_box5_MYB	2.863	-689	-684
Pm027308	DREB_AP2_EREBP	3.4138	-184	-179
Pm027308	Myb_box2_MYB	2.7307	-688	-683
Gene	TF_Name	Z-Score	Start	End
Pm027311	Myb_box3_MYB	2.1641	-510	-505
Pm027311	HSE1_HSF	1.595	-922	-915
Pm027311	C_ABRE_bZIP	3.8701	-683	-678
Pm027311	C_ABRE_bZIP	3.8701	-492	-487
Pm027311	W_box_WRKY	2.2389	-666	-661
Pm027311	W_box_WRKY	2.2389	-670	-665
Pm027311	Myb_box2_MYB	2.9726	-737	-732
Pm027311	Myb_box5_MYB	2.1151	-736	-731
Pm027311	Myb_box5_MYB	2.1151	-738	-733
Gene	TF_Name	Z-Score	Start	End
Pm027339	Myb_box2_MYB	2.4226	-499	-494
Pm027339	Myb_box5_MYB	1.8132	-530	-525
Pm027339	Myb_box5_MYB	1.8132	-528	-523
Pm027339	Myb_box5_MYB	1.8132	-194	-189
Pm027339	Myb_box5_MYB	1.8132	-500	-495
Pm027339	AuxRE_ARF	2.4124	-158	-153
Pm027339	G_box2_bZIP	2.6431	-776	-771
Pm027339	DREB_AP2_EREBP	3.1264	-944	-939
Gene	TF_Name	Z-Score	Start	End
Pm027344	Myb_box1_MYB	2.2531	-531	-526
Pm027344	Myb_box1_MYB	2.2531	-932	-927
Pm027344	Myb_box1_MYB	2.2531	-529	-524
Pm027344	DREB_AP2_EREBP	2.8282	-466	-461
Pm027344	DREB_AP2_EREBP	2.8282	-470	-465
Pm027344	W_box_WRKY	2.2704	-671	-666
Pm027344	Myb_box2_MYB	2.9023	-946	-941
Pm027344	AuxRE_ARF	2.8414	-179	-174
Pm027344	Myb_box5_MYB	2.1393	-932	-927
Pm027344	Myb_box5_MYB	2.1393	-531	-526
Pm027344	Myb_box5_MYB	2.1393	-529	-524
Gene	TF_Name	Z-Score	Start	End
Pm027461	G_box2_bZIP	2.6348	-53	-48
Pm027461	Myb_box1_MYB	1.9442	-895	-890
Pm027461	Myb_box1_MYB	1.9442	-779	-774
Pm027461	Myb_box2_MYB	2.535	-689	-684
Pm027461	Myb_box5_MYB	1.8138	-688	-683
Pm027461	Myb_box5_MYB	1.8138	-745	-740
Pm027461	Myb_box5_MYB	1.8138	-897	-892
Pm027461	Myb_box5_MYB	1.8138	-779	-774
Pm027461	Myb_box5_MYB	1.8138	-771	-766
Pm027461	Myb_box5_MYB	1.8138	-895	-890
Pm027461	Myb_box5_MYB	1.8138	-732	-727
Pm027461	Myb_box5_MYB	1.8138	-747	-742
Pm027461	Myb_box4_MYB	2.3939	-461	-455
Pm027461	Myb_box4_MYB	2.3939	-609	-603
Pm027461	Myb_box4_MYB	2.3939	-456	-450
Pm027461	N_box_bHLH	2.4601	-430	-425
Pm027461	N_box_bHLH	2.4601	-621	-616
Gene	TF_Name	Z-Score	Start	End
Pm027464	Myb_box2_MYB	2.3686	-479	-474
Pm027464	AuxRE_ARF	2.3304	-78	-73
Pm027464	Myb_box5_MYB	1.7379	-56	-51
Pm027464	Myb_box5_MYB	1.7379	-488	-483
Gene	TF_Name	Z-Score	Start	End
Pm027490	N_box_bHLH	2.6451	-95	-90
Pm027490	N_box_bHLH	2.6451	-679	-674
Pm027490	W_box_WRKY	2.1003	-360	-355
Pm027490	G_box2_bZIP	2.0463	-832	-827
Pm027490	Myb_box3_MYB	2.021	-615	-610
Pm027490	Myb_box5_MYB	2.797	-632	-627
Gene	TF_Name	Z-Score	Start	End
Pm027624	C_ABRE_bZIP	3.4766	-791	-786
Pm027624	Myb_box5_MYB	1.8573	-142	-137
Pm027624	Myb_box5_MYB	1.8573	-62	-57
Pm027624	Myb_box2_MYB	2.7444	-762	-757
Pm027624	Myb_box1_MYB	1.9049	-62	-57
Pm027624	AuxRE_ARF	2.5005	-795	-790
Pm027624	G_ABRE_bZIP	2.7529	-348	-341
Gene	TF_Name	Z-Score	Start	End
Pm027666	G_box2_bZIP	2.1853	-700	-695
Pm027666	AuxRE_ARF	2.809	-567	-562
Pm027666	W_box_WRKY	2.247	-219	-214
Pm027666	DREB_AP2_EREBP	3.591	-560	-555
Gene	TF_Name	Z-Score	Start	End
Pm027731	Myb_box5_MYB	1.958	-213	-208
Pm027731	Myb_box5_MYB	1.958	-224	-219
Pm027731	Myb_box5_MYB	1.958	-47	-42
Pm027731	Myb_box5_MYB	1.958	-45	-40
Pm027731	Myb_box5_MYB	1.958	-286	-281
Pm027731	Myb_box5_MYB	1.958	-296	-291
Pm027731	Myb_box5_MYB	1.958	-250	-245
Pm027731	Myb_box5_MYB	1.958	-452	-447
Pm027731	Myb_box1_MYB	2.0776	-213	-208
Pm027731	Myb_box1_MYB	2.0776	-250	-245
Pm027731	Myb_box1_MYB	2.0776	-296	-291
Pm027731	Myb_box4_MYB	2.6713	-888	-882
Gene	TF_Name	Z-Score	Start	End
Pm027761	Myb_box4_MYB	2.455	-826	-820
Pm027761	W_box_WRKY	2.0489	-925	-920
Pm027761	N_box_bHLH	2.5038	-473	-468
Pm027761	Myb_box5_MYB	1.8627	-434	-429
Pm027761	DREB_AP2_EREBP	3.1414	-549	-544
Pm027761	DREB_AP2_EREBP	3.1414	-737	-732
Pm027761	Myb_box2_MYB	2.5663	-97	-92
Pm027761	Myb_box2_MYB	2.5663	-466	-461
Gene	TF_Name	Z-Score	Start	End
Pm027770	Myb_box5_MYB	2.4044	-699	-694
Pm027770	Myb_box1_MYB	2.4184	-699	-694
Pm027770	G_box_bHLH	2.8256	-833	-828
Pm027770	DREB_AP2_EREBP	2.8931	-17	-12

## Sheet: P. persica
Gene	TF_Name	Z-Score	Start	End
Prupe.2G289500.1	Myb_box2_MYB	2.147	-11	-6
Prupe.2G289500.1	N_box_bHLH	2.1751	-511	-506
Prupe.2G289500.1	Myb_box4_MYB	2.0525	-160	-154
Prupe.2G289500.1	DREB_AP2_EREBP	2.1777	-534	-529
Prupe.2G289500.1	AuxRE_ARF	2.2578	-597	-592
Prupe.2G289500.1	Myb_box5_MYB	2.2633	-684	-679
Prupe.2G289500.1	Myb_box1_MYB	2.3985	-684	-679
Gene	TF_Name	Z-Score	Start	End
Prupe.2G284500.1	Myb_box1_MYB	2.8206	-172	-167
Prupe.2G284500.1	Myb_box1_MYB	2.8206	-588	-583
Prupe.2G284500.1	Myb_box5_MYB	2.7356	-172	-167
Prupe.2G284500.1	Myb_box5_MYB	2.7356	-588	-583
Prupe.2G284500.1	AuxRE_ARF	2.5782	-926	-921
Prupe.2G284500.1	W_box_WRKY	2.0875	-640	-635
Prupe.2G284500.1	N_box_bHLH	2.5998	-226	-221
Prupe.2G284500.1	Myb_box2_MYB	2.5441	-96	-91
Prupe.2G284500.1	Myb_box2_MYB	2.5441	-328	-323
Prupe.2G284500.1	DREB_AP2_EREBP	2.6255	-461	-456
Gene	TF_Name	Z-Score	Start	End
Prupe.2G286800.1	Myb_box5_MYB	1.7202	-779	-774
Prupe.2G286800.1	Myb_box5_MYB	1.7202	-502	-497
Prupe.2G286800.1	Myb_box5_MYB	1.7202	-154	-149
Prupe.2G286800.1	Myb_box1_MYB	1.8506	-502	-497
Prupe.2G286800.1	Myb_box1_MYB	1.8506	-779	-774
Prupe.2G286800.1	DREB_AP2_EREBP	2.3807	-669	-664
Prupe.2G286800.1	AuxRE_ARF	2.3609	-734	-729
Prupe.2G286800.1	AuxRE_ARF	2.3609	-965	-960
Gene	TF_Name	Z-Score	Start	End
Prupe.8G178900.1	Nac_box_NAC	2.8192	-464	-459
Prupe.8G178900.1	Nac_box_NAC	2.8192	-763	-758
Prupe.8G178900.1	Myb_box1_MYB	2.1514	-556	-551
Prupe.8G178900.1	G_box_bHLH	3.4424	-766	-761
Prupe.8G178900.1	DREB_AP2_EREBP	2.7979	-95	-90
Prupe.8G178900.1	W_box_WRKY	2.2374	-233	-228
Prupe.8G178900.1	Myb_box5_MYB	2.0494	-125	-120
Prupe.8G178900.1	Myb_box5_MYB	2.0494	-271	-266
Prupe.8G178900.1	Myb_box5_MYB	2.0494	-556	-551
Prupe.8G178900.1	Myb_box5_MYB	2.0494	-443	-438
Gene	TF_Name	Z-Score	Start	End
Prupe.6G244300.2	G_box_bHLH	3.1927	-185	-180
Prupe.6G244300.2	Myb_box5_MYB	2.6414	-456	-451
Prupe.6G244300.2	Myb_box5_MYB	2.6414	-978	-973
Prupe.6G244300.2	Myb_box3_MYB	2.0687	-776	-771
Prupe.6G244300.2	Myb_box2_MYB	2.5022	-594	-589
Prupe.6G244300.2	Myb_box1_MYB	2.7708	-456	-451
Prupe.6G244300.2	Myb_box4_MYB	2.3938	-547	-541
Prupe.6G244300.2	Myb_box4_MYB	2.3938	-451	-445
Prupe.6G244300.2	Myb_box4_MYB	2.3938	-542	-536
Gene	TF_Name	Z-Score	Start	End
Prupe.6G074700.1	Myb_box5_MYB	2.0157	-481	-476
Prupe.6G074700.1	Myb_box5_MYB	2.0157	-245	-240
Prupe.6G074700.1	Myb_box5_MYB	2.0157	-594	-589
Prupe.6G074700.1	Myb_box5_MYB	2.0157	-240	-235
Prupe.6G074700.1	Myb_box5_MYB	2.0157	-479	-474
Prupe.6G074700.1	HSE1_HSF	1.5813	-896	-889
Prupe.6G074700.1	Myb_box3_MYB	2.1173	-757	-752
Prupe.6G074700.1	W_box_WRKY	2.2289	-136	-131
Prupe.6G074700.1	DREB_AP2_EREBP	3.4161	-248	-243
Prupe.6G074700.1	AuxRE_ARF	2.8565	-677	-672
Prupe.6G074700.1	Myb_box2_MYB	2.8384	-480	-475
Prupe.6G074700.1	Myb_box2_MYB	2.8384	-836	-831
Gene	TF_Name	Z-Score	Start	End
Prupe.6G284600.1	W_box_WRKY	2.0682	-322	-317
Prupe.6G284600.1	AuxRE_ARF	2.5063	-301	-296
Prupe.6G284600.1	Myb_box1_MYB	2.0608	-102	-97
Prupe.6G284600.1	Myb_box1_MYB	2.0608	-960	-955
Prupe.6G284600.1	Myb_box5_MYB	2.7845	-962	-957
Prupe.6G284600.1	Myb_box3_MYB	2.0143	-736	-731
Prupe.6G284600.1	Myb_box2_MYB	2.6485	-316	-311
Prupe.6G284600.1	Myb_box2_MYB	2.6485	-671	-666
Prupe.6G284600.1	DREB_AP2_EREBP	3.3779	-412	-407
Prupe.6G284600.1	Nac_box_NAC	2.7709	-788	-783
Gene	TF_Name	Z-Score	Start	End
Prupe.6G007700.1	Myb_box1_MYB	2.3763	-98	-93
Prupe.6G007700.1	G_box_bHLH	3.6074	-362	-357
Prupe.6G007700.1	Nac_box_NAC	3.0248	-859	-854
Prupe.6G007700.1	Nac_box_NAC	3.0248	-950	-945
Prupe.6G007700.1	HBE_HB	2.4251	-719	-711
Prupe.6G007700.1	W_box_WRKY	1.6776	-125	-120
Prupe.6G007700.1	Myb_box5_MYB	2.249	-98	-93
Gene	TF_Name	Z-Score	Start	End
Prupe.6G358900.1	Myb_box5_MYB	2.8243	-409	-404
Prupe.6G358900.1	Myb_box1_MYB	2.8513	-409	-404
Prupe.6G358900.1	Myb_box3_MYB	2.0981	-688	-683
Prupe.6G358900.1	W_box_WRKY	2.231	-388	-383
Gene	TF_Name	Z-Score	Start	End
Prupe.6G087700.1	Myb_box5_MYB	1.8874	-560	-555
Prupe.6G087700.1	Myb_box5_MYB	1.8874	-788	-783
Prupe.6G087700.1	Myb_box5_MYB	1.8874	-461	-456
Prupe.6G087700.1	Myb_box2_MYB	2.6762	-848	-843
Prupe.6G087700.1	DREB_AP2_EREBP	2.5149	-845	-840
Prupe.6G087700.1	Myb_box1_MYB	1.9796	-560	-555
Prupe.6G087700.1	Myb_box1_MYB	1.9796	-461	-456
Prupe.6G087700.1	G_box2_bZIP	1.9888	-465	-460
Prupe.6G087700.1	Nac_box_NAC	2.5658	-365	-360
Gene	TF_Name	Z-Score	Start	End
Prupe.6G072400.1	G_box_bHLH	2.8534	-269	-264
Prupe.6G072400.1	AuxRE_ARF	2.3196	-921	-916
Prupe.6G072400.1	AuxRE_ARF	2.3196	-916	-911
Prupe.6G072400.1	DREB_AP2_EREBP	2.325	-418	-413
Prupe.6G072400.1	Myb_box2_MYB	2.5273	-42	-37
Prupe.6G072400.1	Myb_box2_MYB	2.5273	-487	-482
Prupe.6G072400.1	Nac_box_NAC	2.2742	-805	-800
Prupe.6G072400.1	Nac_box_NAC	2.2742	-754	-749
Prupe.6G072400.1	Myb_box3_MYB	1.7629	-727	-722
Prupe.6G072400.1	Myb_box5_MYB	1.6823	-488	-483
Prupe.6G072400.1	Myb_box5_MYB	1.6823	-43	-38
Prupe.6G072400.1	Myb_box5_MYB	1.6823	-77	-72
Prupe.6G072400.1	G_box2_bZIP	2.4199	-535	-530
Gene	TF_Name	Z-Score	Start	End
Prupe.6G358000.2	Nac_box_NAC	2.892	-423	-418
Prupe.6G358000.2	Myb_box5_MYB	2.1891	-342	-337
Prupe.6G358000.2	Myb_box5_MYB	2.1891	-340	-335
Prupe.6G358000.2	Myb_box5_MYB	2.1891	-349	-344
Prupe.6G358000.2	Myb_box4_MYB	3.0438	-346	-340
Prupe.6G358000.2	Myb_box2_MYB	3.1322	-341	-336
Prupe.6G358000.2	W_box_WRKY	1.61	-937	-932
Gene	TF_Name	Z-Score	Start	End
Prupe.6G078700.1	Myb_box4_MYB	2.9474	-704	-698
Prupe.6G078700.1	Myb_box3_MYB	2.3547	-636	-631
Prupe.6G078700.1	Myb_box1_MYB	3.1551	-138	-133
Prupe.6G078700.1	Nac_box_NAC	3.0681	-448	-443
Prupe.6G078700.1	W_box_WRKY	1.6892	-502	-497
Prupe.6G078700.1	Myb_box2_MYB	3.093	-529	-524
Prupe.6G078700.1	Myb_box2_MYB	3.093	-428	-423
Prupe.6G078700.1	AuxRE_ARF	3.0094	-598	-593
Prupe.6G078700.1	Myb_box5_MYB	3.0698	-138	-133
Prupe.6G078700.1	N_box_bHLH	3.0083	-487	-482
Gene	TF_Name	Z-Score	Start	End
Prupe.6G286000.1	Myb_box5_MYB	1.9044	-451	-446
Prupe.6G286000.1	Myb_box5_MYB	1.9044	-857	-852
Prupe.6G286000.1	AuxRE_ARF	2.5513	-323	-318
Prupe.6G286000.1	AuxRE_ARF	2.5513	-761	-756
Prupe.6G286000.1	C_ABRE_bZIP	3.7368	-130	-125
Prupe.6G286000.1	DREB_AP2_EREBP	2.5678	-854	-849
Prupe.6G286000.1	Myb_box3_MYB	2.0771	-490	-485
Prupe.6G286000.1	GCC_box_AP2_EREBP	3.9331	-142	-137
Gene	TF_Name	Z-Score	Start	End
Prupe.6G277500.1	Myb_box2_MYB	2.4384	-118	-113
Prupe.6G277500.1	Myb_box2_MYB	2.4384	-73	-68
Prupe.6G277500.1	Myb_box2_MYB	2.4384	-252	-247
Prupe.6G277500.1	Myb_box3_MYB	2.0344	-971	-966
Prupe.6G277500.1	N_box_bHLH	3.0875	-291	-286
Prupe.6G277500.1	Myb_box5_MYB	2.5678	-504	-499
Prupe.6G277500.1	Nac_box_NAC	2.6645	-871	-866
Prupe.6G277500.1	Myb_box4_MYB	2.3474	-23	-17
Gene	TF_Name	Z-Score	Start	End
Prupe.6G234400.1	HSE1_HSF	1.5081	-630	-623
Prupe.6G234400.1	HSE1_HSF	1.5081	-199	-192
Prupe.6G234400.1	Myb_box3_MYB	2.1073	-130	-125
Prupe.6G234400.1	G_box2_bZIP	2.1167	-587	-582
Prupe.6G234400.1	W_box_WRKY	2.1694	-477	-472
Prupe.6G234400.1	N_box_bHLH	2.7654	-739	-734
Prupe.6G234400.1	N_box_bHLH	2.7654	-569	-564
Gene	TF_Name	Z-Score	Start	End
Prupe.6G090400.1	N_box_bHLH	3.0171	-145	-140
Prupe.6G090400.1	Myb_box5_MYB	3.0809	-324	-319
Prupe.6G090400.1	W_box_WRKY	2.5002	-73	-68
Prupe.6G090400.1	W_box_WRKY	2.5002	-114	-109
Prupe.6G090400.1	Myb_box2_MYB	3.071	-712	-707
Prupe.6G090400.1	Myb_box1_MYB	2.4273	-335	-330
Prupe.6G090400.1	Myb_box1_MYB	2.4273	-135	-130
Prupe.6G090400.1	HSE1_HSF	1.8838	-915	-908
Gene	TF_Name	Z-Score	Start	End
Prupe.6G008200.1	Myb_box2_MYB	2.5835	-908	-903
Prupe.6G008200.1	C_ABRE_bZIP	3.5811	-777	-772
Prupe.6G008200.1	W_box_WRKY	1.9915	-657	-652
Prupe.6G008200.1	Nac_box_NAC	2.5367	-807	-802
Prupe.6G008200.1	Myb_box1_MYB	1.9336	-920	-915
Prupe.6G008200.1	Myb_box5_MYB	1.8301	-182	-177
Prupe.6G008200.1	Myb_box5_MYB	1.8301	-965	-960
Prupe.6G008200.1	Myb_box5_MYB	1.8301	-920	-915
Prupe.6G008200.1	G_box2_bZIP	1.9264	-475	-470
Gene	TF_Name	Z-Score	Start	End
Prupe.4G176700.1	Nac_box_NAC	2.9881	-788	-783
Prupe.4G176700.1	Nac_box_NAC	2.9881	-819	-814
Prupe.4G176700.1	Nac_box_NAC	2.9881	-873	-868
Prupe.4G176700.1	Nac_box_NAC	2.9881	-842	-837
Prupe.4G176700.1	Myb_box5_MYB	3.2617	-932	-927
Prupe.4G176700.1	Myb_box1_MYB	3.2343	-932	-927
Gene	TF_Name	Z-Score	Start	End
Prupe.5G166300.1	W_box_WRKY	2.1549	-199	-194
Prupe.5G166300.1	Nac_box_NAC	2.6674	-456	-451
Prupe.5G166300.1	Myb_box5_MYB	2.0067	-9	-4
Gene	TF_Name	Z-Score	Start	End
Prupe.5G165700.1	Nac_box_NAC	2.6976	-353	-348
Prupe.5G165700.1	Myb_box5_MYB	1.9453	-829	-824
Prupe.5G165700.1	AuxRE_ARF	2.4609	-787	-782
Prupe.5G165700.1	Myb_box1_MYB	2.0464	-829	-824
Prupe.5G165700.1	Myb_box3_MYB	1.9938	-939	-934
Gene	TF_Name	Z-Score	Start	End
Prupe.7G197500.1	Myb_box1_MYB	2.3323	-282	-277
Prupe.7G197500.1	Myb_box5_MYB	2.1805	-282	-277
Prupe.7G197500.1	Myb_box5_MYB	2.1805	-17	-12
Prupe.7G197500.1	Myb_box5_MYB	2.1805	-284	-279
Prupe.7G197500.1	Myb_box2_MYB	3.0483	-729	-724
Prupe.7G197500.1	W_box_WRKY	2.4254	-557	-552
Prupe.7G197500.1	W_box_WRKY	2.4254	-640	-635
Prupe.7G197500.1	G_box_bHLH	3.5843	-544	-539
Prupe.7G197500.1	G_box_bHLH	3.5843	-650	-645
Gene	TF_Name	Z-Score	Start	End
Prupe.7G238400.1	W_box_WRKY	2.2305	-17	-12
Prupe.7G238400.1	Myb_box3_MYB	2.1708	-295	-290
Prupe.7G238400.1	G_box2_bZIP	2.1918	-512	-507
Prupe.7G238400.1	Myb_box5_MYB	2.0715	-312	-307
Prupe.7G238400.1	Myb_box5_MYB	2.0715	-362	-357
Prupe.7G238400.1	Myb_box2_MYB	2.8927	-887	-882
Gene	TF_Name	Z-Score	Start	End
Prupe.7G123500.1	Nac_box_NAC	3.0804	-974	-969
Prupe.7G123500.1	Myb_box5_MYB	2.3398	-700	-695
Prupe.7G123500.1	Myb_box5_MYB	2.3398	-911	-906
Prupe.7G123500.1	DREB_AP2_EREBP	3.8093	-789	-784
Prupe.7G123500.1	Myb_box1_MYB	2.4297	-700	-695
Prupe.7G123500.1	W_box_WRKY	2.5679	-670	-665
Gene	TF_Name	Z-Score	Start	End
Prupe.7G117700.1	N_box_bHLH	2.7932	-580	-575
Prupe.7G117700.1	G_box2_bZIP	2.2697	-489	-484
Prupe.7G117700.1	G_box2_bZIP	2.2697	-374	-369
Prupe.7G117700.1	C_ABRE_bZIP	3.9391	-163	-158
Gene	TF_Name	Z-Score	Start	End
Prupe.7G238800.1	AuxRE_ARF	2.7797	-284	-279
Prupe.7G238800.1	GCC_box_AP2_EREBP	4.4105	-972	-967
Prupe.7G238800.1	Myb_box3_MYB	2.2299	-859	-854
Prupe.7G238800.1	Myb_box5_MYB	2.9759	-966	-961
Prupe.7G238800.1	G_box2_bZIP	2.2521	-388	-383
Prupe.7G238800.1	Myb_box1_MYB	1.5128	-859	-854
Gene	TF_Name	Z-Score	Start	End
Prupe.7G198500.1	Myb_box4_MYB	2.751	-720	-714
Prupe.7G198500.1	W_box_WRKY	1.5522	-694	-689
Prupe.7G198500.1	DREB_AP2_EREBP	2.8134	-83	-78
Prupe.7G198500.1	N_box_bHLH	2.8203	-14	-9
Prupe.7G198500.1	Myb_box5_MYB	2.9094	-68	-63
Prupe.7G198500.1	Myb_box5_MYB	2.9094	-136	-131
Prupe.7G198500.1	G_box_bHLH	3.4361	-947	-942
Prupe.7G198500.1	Myb_box1_MYB	2.9734	-68	-63
Prupe.7G198500.1	Myb_box1_MYB	2.9734	-136	-131
Gene	TF_Name	Z-Score	Start	End
Prupe.7G119800.1	Myb_box3_MYB	2.3443	-449	-444
Prupe.7G119800.1	N_box_bHLH	3.553	-962	-957
Prupe.7G119800.1	G_box2_bZIP	2.3836	-65	-60
Prupe.7G119800.1	Myb_box1_MYB	3.0805	-23	-18
Prupe.7G119800.1	Myb_box5_MYB	3.0001	-23	-18
Prupe.7G119800.1	HSE1_HSF	1.8282	-91	-84
Prupe.7G119800.1	W_box_WRKY	2.461	-43	-38
Gene	TF_Name	Z-Score	Start	End
Prupe.7G122200.1	Myb_box2_MYB	2.9969	-32	-27
Prupe.7G122200.1	N_box_bHLH	2.682	-20	-15
Prupe.7G122200.1	Myb_box5_MYB	2.8135	-798	-793
Prupe.7G122200.1	Myb_box1_MYB	2.803	-798	-793
Prupe.7G122200.1	AuxRE_ARF	2.7979	-449	-444
Gene	TF_Name	Z-Score	Start	End
Prupe.7G266800.1	Myb_box2_MYB	2.6461	-372	-367
Prupe.7G266800.1	Myb_box5_MYB	2.543	-740	-735
Prupe.7G266800.1	Nac_box_NAC	2.4028	-31	-26
Prupe.7G266800.1	Nac_box_NAC	2.4028	-611	-606
Prupe.7G266800.1	Myb_box1_MYB	2.5523	-740	-735
Gene	TF_Name	Z-Score	Start	End
Prupe.7G237900.1	Myb_box3_MYB	2.0932	-262	-257
Prupe.7G237900.1	Myb_box3_MYB	2.0932	-288	-283
Prupe.7G237900.1	Myb_box1_MYB	2.7874	-90	-85
Prupe.7G237900.1	Myb_box1_MYB	2.7874	-657	-652
Prupe.7G237900.1	W_box_WRKY	2.1775	-48	-43
Prupe.7G237900.1	Myb_box5_MYB	2.8085	-90	-85
Prupe.7G237900.1	Myb_box5_MYB	2.8085	-657	-652
Gene	TF_Name	Z-Score	Start	End
Prupe.3G011000.2	W_box_WRKY	1.5047	-231	-226
Prupe.3G011000.2	W_box_WRKY	1.5047	-413	-408
Prupe.3G011000.2	Myb_box5_MYB	2.157	-673	-668
Prupe.3G011000.2	AuxRE_ARF	2.8661	-169	-164
Prupe.3G011000.2	G_box2_bZIP	2.2496	-116	-111
Gene	TF_Name	Z-Score	Start	End
Prupe.3G009400.1	Myb_box4_MYB	2.4511	-18	-12
Prupe.3G009400.1	AuxRE_ARF	2.5091	-219	-214
Prupe.3G009400.1	DREB_AP2_EREBP	3.3906	-315	-310
Prupe.3G009400.1	N_box_bHLH	2.6315	-451	-446
Prupe.3G009400.1	Myb_box5_MYB	2.7731	-801	-796
Prupe.3G009400.1	Myb_box1_MYB	2.0321	-265	-260
Gene	TF_Name	Z-Score	Start	End
Prupe.3G275300.1	Myb_box2_MYB	2.9995	-141	-136
Prupe.3G275300.1	Myb_box5_MYB	2.0366	-503	-498
Prupe.3G275300.1	Myb_box5_MYB	2.0366	-840	-835
Prupe.3G275300.1	Myb_box5_MYB	2.0366	-56	-51
Prupe.3G275300.1	Myb_box5_MYB	2.0366	-84	-79
Prupe.3G275300.1	Myb_box5_MYB	2.0366	-842	-837
Prupe.3G275300.1	Myb_box3_MYB	2.1216	-565	-560
Prupe.3G275300.1	Myb_box3_MYB	2.1216	-605	-600
Prupe.3G275300.1	N_box_bHLH	2.7152	-836	-831
Prupe.3G275300.1	AuxRE_ARF	2.8309	-812	-807
Prupe.3G275300.1	AuxRE_ARF	2.8309	-905	-900
Gene	TF_Name	Z-Score	Start	End
Prupe.3G293100.1	W_box_WRKY	1.5816	-825	-820
Prupe.3G293100.1	Myb_box5_MYB	2.1539	-939	-934
Gene	TF_Name	Z-Score	Start	End
Prupe.1G512800.1	Myb_box5_MYB	1.6601	-172	-167
Prupe.1G512800.1	Myb_box5_MYB	1.6601	-840	-835
Prupe.1G512800.1	Myb_box5_MYB	1.6601	-839	-834
Prupe.1G512800.1	Myb_box5_MYB	1.6601	-842	-837
Prupe.1G512800.1	AuxRE_ARF	3.3664	-444	-439
Prupe.1G512800.1	AuxRE_ARF	3.3664	-797	-792
Prupe.1G512800.1	G_box2_bZIP	2.6878	-256	-251
Prupe.1G512800.1	G_box2_bZIP	2.6878	-381	-376
Prupe.1G512800.1	N_box_bHLH	3.3174	-204	-199
Prupe.1G512800.1	Myb_box4_MYB	3.2936	-863	-857
Gene	TF_Name	Z-Score	Start	End
Prupe.1G241700.1	DREB_AP2_EREBP	2.6641	-716	-711
Prupe.1G241700.1	Nac_box_NAC	2.6628	-328	-323
Prupe.1G241700.1	Myb_box1_MYB	2.81	-65	-60
Prupe.1G241700.1	W_box_WRKY	2.1144	-622	-617
Prupe.1G241700.1	Myb_box5_MYB	2.789	-65	-60
Gene	TF_Name	Z-Score	Start	End
Prupe.1G398700.1	Myb_box2_MYB	2.6036	-254	-249
Prupe.1G398700.1	Myb_box2_MYB	2.6036	-404	-399
Prupe.1G398700.1	Myb_box4_MYB	2.4885	-948	-942
Prupe.1G398700.1	Myb_box4_MYB	2.4885	-525	-519
Prupe.1G398700.1	DREB_AP2_EREBP	2.5666	-904	-899
Prupe.1G398700.1	N_box_bHLH	2.5663	-780	-775
Gene	TF_Name	Z-Score	Start	End
Prupe.1G431100.2	G_box2_bZIP	1.927	-321	-316
Prupe.1G431100.2	Myb_box4_MYB	2.4777	-610	-604
Prupe.1G431100.2	Myb_box5_MYB	1.8427	-260	-255
Prupe.1G431100.2	Myb_box5_MYB	1.8427	-499	-494
Prupe.1G431100.2	G_box_bHLH	3.0773	-533	-528
Prupe.1G431100.2	GCC_box_AP2_EREBP	3.9335	-742	-737
Prupe.1G431100.2	Myb_box1_MYB	1.9433	-499	-494
Prupe.1G431100.2	W_box_WRKY	1.9937	-106	-101
Gene	TF_Name	Z-Score	Start	End
Prupe.1G433000.1	N_box_bHLH	2.7081	-788	-783
Prupe.1G433000.1	W_box_WRKY	2.2613	-380	-375
Prupe.1G433000.1	Myb_box5_MYB	2.0102	-216	-211
Prupe.1G433000.1	Myb_box5_MYB	2.0102	-565	-560
Prupe.1G433000.1	Myb_box5_MYB	2.0102	-214	-209
Prupe.1G433000.1	Myb_box5_MYB	2.0102	-533	-528
Prupe.1G433000.1	Myb_box1_MYB	2.1524	-565	-560
Prupe.1G433000.1	Myb_box1_MYB	2.1524	-533	-528
Gene	TF_Name	Z-Score	Start	End
Prupe.1G362600.1	Nac_box_NAC	2.5575	-233	-228
Prupe.1G362600.1	Myb_box5_MYB	2.6807	-886	-881
Prupe.1G362600.1	Myb_box1_MYB	2.7094	-886	-881
Prupe.1G362600.1	N_box_bHLH	3.2425	-862	-857
Prupe.1G362600.1	AuxRE_ARF	2.5617	-74	-69
Prupe.1G362600.1	AuxRE_ARF	2.5617	-523	-518
Gene	TF_Name	Z-Score	Start	End
Prupe.1G458200.1	Myb_box5_MYB	3.0449	-167	-162
Prupe.1G458200.1	Myb_box1_MYB	3.1465	-167	-162
Prupe.1G458200.1	W_box_WRKY	1.7007	-182	-177
Prupe.1G458200.1	W_box_WRKY	1.7007	-622	-617

## Sheet: R. chinensis
Gene	TF_Name	Z-Score	Start	End
RC1G0048700	Myb_box3_MYB	2.3479	-890	-885
RC1G0048700	W_box_WRKY	1.6535	-673	-668
RC1G0048700	Nac_box_NAC	3.1636	-826	-821
RC1G0048700	Myb_box5_MYB	3.1101	-598	-593
RC1G0048700	Myb_box5_MYB	3.1101	-311	-306
RC1G0048700	Myb_box2_MYB	3.0532	-244	-239
RC1G0048700	Myb_box1_MYB	3.1978	-311	-306
Gene	TF_Name	Z-Score	Start	End
RC1G0377500	AuxRE_ARF	3.0985	-25	-20
RC1G0377500	G_box_bHLH	3.654	-396	-391
RC1G0377500	G_box2_bZIP	2.3922	-313	-308
Gene	TF_Name	Z-Score	Start	End
RC1G0197600	W_box_WRKY	2.274	-140	-135
RC1G0197600	Myb_box5_MYB	2.0932	-391	-386
RC1G0197600	Nac_box_NAC	2.764	-280	-275
Gene	TF_Name	Z-Score	Start	End
RC1G0199100	Myb_box3_MYB	2.3449	-205	-200
RC1G0199100	W_box_WRKY	2.4418	-704	-699
RC1G0199100	Myb_box5_MYB	2.2032	-228	-223
RC1G0199100	Myb_box5_MYB	2.2032	-470	-465
RC1G0199100	Myb_box5_MYB	2.2032	-786	-781
RC1G0199100	Myb_box5_MYB	2.2032	-160	-155
RC1G0199100	G_box2_bZIP	2.4	-209	-204
RC1G0199100	Myb_box2_MYB	2.9508	-758	-753
RC1G0199100	Myb_box1_MYB	1.5659	-205	-200
Gene	TF_Name	Z-Score	Start	End
RC1G0204400	Nac_box_NAC	2.6806	-544	-539
RC1G0204400	Myb_box5_MYB	2.8363	-161	-156
RC1G0204400	Myb_box1_MYB	2.8467	-161	-156
Gene	TF_Name	Z-Score	Start	End
RC1G0313200	Myb_box2_MYB	2.7895	-384	-379
RC1G0313200	Myb_box2_MYB	2.7895	-216	-211
RC1G0313200	Myb_box3_MYB	2.0579	-164	-159
RC1G0313200	DREB_AP2_EREBP	3.3421	-241	-236
RC1G0313200	Myb_box5_MYB	2.0019	-806	-801
RC1G0313200	G_box_bHLH	3.2618	-813	-808
RC1G0313200	AuxRE_ARF	2.6451	-478	-473
RC1G0313200	AuxRE_ARF	2.6451	-531	-526
RC1G0313200	AuxRE_ARF	2.6451	-211	-206
RC1G0313200	Myb_box1_MYB	2.0784	-806	-801
Gene	TF_Name	Z-Score	Start	End
RC1G0370800	Nac_box_NAC	3.4123	-481	-476
RC1G0370800	Myb_box5_MYB	2.5124	-985	-980
RC1G0370800	W_box_WRKY	1.8758	-243	-238
RC1G0370800	G_box2_bZIP	2.6255	-224	-219
Gene	TF_Name	Z-Score	Start	End
RC1G0377500	Myb_box5_MYB	2.0893	-788	-783
RC1G0377500	Myb_box3_MYB	2.1372	-84	-79
RC1G0377500	Myb_box3_MYB	2.1372	-903	-898
RC1G0377500	G_box_bHLH	3.4472	-878	-873
RC1G0377500	G_box2_bZIP	2.1471	-607	-602
RC1G0377500	GCC_box_AP2_EREBP	4.5351	-301	-296
RC1G0377500	DREB_AP2_EREBP	2.8305	-882	-877
RC1G0377500	AuxRE_ARF	2.7876	-10	-5
Gene	TF_Name	Z-Score	Start	End
RC1G0382700	Nac_box_NAC	2.8779	-266	-261
RC1G0382700	G_box_bHLH	3.4349	-380	-375
Gene	TF_Name	Z-Score	Start	End
RC1G0394400	W_box_WRKY	1.5267	-218	-213
RC1G0394400	Myb_box1_MYB	1.5487	-356	-351
RC1G0394400	Myb_box3_MYB	2.2461	-356	-351
RC1G0394400	DREB_AP2_EREBP	2.8601	-75	-70
RC1G0394400	G_box_bHLH	3.4816	-931	-926
Gene	TF_Name	Z-Score	Start	End
RC1G0474500	Myb_box1_MYB	1.9359	-927	-922
RC1G0474500	G_box2_bZIP	2.7433	-426	-421
RC1G0474500	Myb_box3_MYB	2.6916	-927	-922
RC1G0474500	AuxRE_ARF	3.4664	-510	-505
RC1G0474500	Myb_box5_MYB	2.7072	-325	-320
RC1G0474500	Myb_box5_MYB	2.7072	-664	-659
Gene	TF_Name	Z-Score	Start	End
RC1G0477400	Nac_box_NAC	2.4334	-370	-365
RC1G0477400	G_box_bHLH	2.9735	-888	-883
RC1G0477400	AuxRE_ARF	2.4406	-79	-74
RC1G0477400	Myb_box5_MYB	1.739	-792	-787
RC1G0477400	Myb_box5_MYB	1.739	-908	-903
Gene	TF_Name	Z-Score	Start	End
RC1G0479700	N_box_bHLH	2.854	-345	-340
RC1G0479700	W_box_WRKY	1.6436	-568	-563
RC1G0479700	W_box_WRKY	1.6436	-604	-599
Gene	TF_Name	Z-Score	Start	End
RC1G0481600	Myb_box2_MYB	2.7446	-198	-193
RC1G0481600	Myb_box5_MYB	2.6722	-169	-164
RC1G0481600	Myb_box1_MYB	2.0032	-997	-992
RC1G0481600	Myb_box1_MYB	2.0032	-637	-632
RC1G0481600	Myb_box1_MYB	2.0032	-697	-692
RC1G0481600	AuxRE_ARF	2.6749	-428	-423
Gene	TF_Name	Z-Score	Start	End
RC1G0484900	Myb_box1_MYB	1.5906	-885	-880
RC1G0484900	Myb_box1_MYB	1.5906	-863	-858
RC1G0484900	Myb_box1_MYB	1.5906	-841	-836
RC1G0484900	Myb_box1_MYB	1.5906	-967	-962
RC1G0484900	Nac_box_NAC	2.1427	-297	-292
RC1G0484900	Myb_box5_MYB	1.5191	-863	-858
RC1G0484900	Myb_box5_MYB	1.5191	-149	-144
RC1G0484900	Myb_box5_MYB	1.5191	-841	-836
RC1G0484900	Myb_box5_MYB	1.5191	-885	-880
RC1G0484900	Myb_box5_MYB	1.5191	-967	-962
RC1G0484900	Myb_box2_MYB	2.3924	-360	-355
RC1G0484900	C_ABRE_bZIP	2.9931	-223	-218
Gene	TF_Name	Z-Score	Start	End
RC1G0486200	Myb_box4_MYB	2.405	-966	-960
RC1G0486200	W_box_WRKY	1.9664	-190	-185
RC1G0486200	W_box_WRKY	1.9664	-346	-341
RC1G0486200	DREB_AP2_EREBP	3.1487	-184	-179
RC1G0486200	Myb_box5_MYB	2.5686	-491	-486
RC1G0486200	Myb_box5_MYB	2.5686	-729	-724
RC1G0486200	Nac_box_NAC	2.508	-473	-468
RC1G0486200	Myb_box2_MYB	2.5489	-86	-81
Gene	TF_Name	Z-Score	Start	End
RC1G0525400	Nac_box_NAC	2.5016	-922	-917
RC1G0525400	Myb_box2_MYB	2.4436	-461	-456
RC1G0525400	G_box_bHLH	3.0582	-450	-445
RC1G0525400	AuxRE_ARF	2.4677	-232	-227
RC1G0525400	AuxRE_ARF	2.4677	-177	-172
RC1G0525400	N_box_bHLH	2.4338	-855	-850
RC1G0525400	G_box2_bZIP	1.8553	-342	-337
RC1G0525400	G_box2_bZIP	1.8553	-157	-152
RC1G0525400	Myb_box1_MYB	2.6079	-861	-856
RC1G0525400	Myb_box5_MYB	2.5529	-861	-856
Gene	TF_Name	Z-Score	Start	End
RC2G0013400	G_box_bHLH	2.8834	-301	-296
RC2G0013400	DREB_AP2_EREBP	2.8887	-341	-336
RC2G0013400	GCC_box_AP2_EREBP	3.6309	-339	-334
RC2G0013400	G_box2_bZIP	1.8105	-586	-581
Gene	TF_Name	Z-Score	Start	End
RC1G0588500	W_box_WRKY	1.5021	-390	-385
RC1G0588500	N_box_bHLH	3.6446	-470	-465
RC1G0588500	Myb_box1_MYB	3.0704	-626	-621
RC1G0588500	Myb_box5_MYB	3.0553	-626	-621
RC1G0588500	AuxRE_ARF	2.8092	-414	-409
RC1G0588500	Myb_box3_MYB	2.2395	-999	-994
Gene	TF_Name	Z-Score	Start	End
RC1G0592900	G_box2_bZIP	2.0534	-719	-714
RC1G0592900	Myb_box3_MYB	2.0631	-18	-13
RC1G0592900	G_box_bHLH	3.2431	-393	-388
RC1G0592900	Myb_box5_MYB	2.7711	-908	-903
RC1G0592900	Myb_box4_MYB	2.7155	-111	-105
RC1G0592900	Myb_box1_MYB	2.8267	-908	-903
Gene	TF_Name	Z-Score	Start	End
RC2G0007900	Myb_box3_MYB	1.8999	-440	-435
RC2G0007900	Nac_box_NAC	2.4188	-426	-421
RC2G0007900	Nac_box_NAC	2.4188	-853	-848
RC2G0007900	Myb_box1_MYB	2.58	-871	-866
RC2G0007900	Myb_box1_MYB	2.58	-636	-631
RC2G0007900	Myb_box5_MYB	2.5821	-871	-866
RC2G0007900	Myb_box5_MYB	2.5821	-636	-631
RC2G0007900	AuxRE_ARF	2.4553	-628	-623
Gene	TF_Name	Z-Score	Start	End
RC2G0008600	Myb_box4_MYB	2.4196	-446	-440
RC2G0008600	Myb_box4_MYB	2.4196	-87	-81
RC2G0008600	Myb_box5_MYB	2.6252	-192	-187
RC2G0008600	G_box_bHLH	3.1701	-878	-873
RC2G0008600	G_box_bHLH	3.1701	-621	-616
RC2G0008600	DREB_AP2_EREBP	3.1915	-968	-963
RC2G0008600	DREB_AP2_EREBP	3.1915	-694	-689
RC2G0008600	N_box_bHLH	2.5482	-431	-426
RC2G0008600	Myb_box1_MYB	2.7203	-192	-187
RC2G0008600	Myb_box2_MYB	2.5184	-373	-368
RC2G0008600	Myb_box2_MYB	2.5184	-825	-820
RC2G0008600	Myb_box3_MYB	1.9698	-607	-602
Gene	TF_Name	Z-Score	Start	End
RC2G0010200	W_box_WRKY	2.1187	-551	-546
RC2G0010200	N_box_bHLH	3.3718	-249	-244
RC2G0010200	Myb_box5_MYB	1.8932	-522	-517
RC2G0010200	Myb_box5_MYB	1.8932	-51	-46
RC2G0010200	Myb_box5_MYB	1.8932	-703	-698
RC2G0010200	Myb_box5_MYB	1.8932	-705	-700
RC2G0010200	Myb_box5_MYB	1.8932	-693	-688
RC2G0010200	Myb_box5_MYB	1.8932	-731	-726
RC2G0010200	Myb_box5_MYB	1.8932	-646	-641
RC2G0010200	Myb_box5_MYB	1.8932	-68	-63
RC2G0010200	Myb_box5_MYB	1.8932	-675	-670
RC2G0010200	Myb_box5_MYB	1.8932	-648	-643
RC2G0010200	Myb_box5_MYB	1.8932	-677	-672
RC2G0010200	Myb_box5_MYB	1.8932	-524	-519
RC2G0010200	Myb_box5_MYB	1.8932	-636	-631
RC2G0010200	Myb_box5_MYB	1.8932	-665	-660
RC2G0010200	Myb_box2_MYB	2.7193	-676	-671
RC2G0010200	Myb_box2_MYB	2.7193	-647	-642
RC2G0010200	Myb_box1_MYB	2.0354	-68	-63
Gene	TF_Name	Z-Score	Start	End
RC2G0013400	W_box_WRKY	2.1208	-781	-776
RC2G0013400	N_box_bHLH	3.2477	-802	-797
RC2G0013400	N_box_bHLH	3.2477	-183	-178
RC2G0013400	DREB_AP2_EREBP	2.5857	-435	-430
RC2G0013400	Myb_box5_MYB	2.7069	-103	-98
RC2G0013400	Myb_box5_MYB	2.7069	-433	-428
RC2G0013400	Myb_box1_MYB	2.7856	-103	-98
Gene	TF_Name	Z-Score	Start	End
RC2G0029600	Myb_box1_MYB	2.8815	-201	-196
RC2G0029600	Myb_box3_MYB	2.1725	-149	-144
RC2G0029600	Myb_box5_MYB	2.7783	-201	-196
Gene	TF_Name	Z-Score	Start	End
RC2G0048000	N_box_bHLH	2.4424	-495	-490
RC2G0048000	Myb_box5_MYB	1.8467	-903	-898
RC2G0048000	G_box_bHLH	2.9882	-997	-992
RC2G0048000	AuxRE_ARF	2.4175	-105	-100
RC2G0048000	Myb_box2_MYB	2.5004	-362	-357
RC2G0048000	Myb_box3_MYB	1.9524	-583	-578
Gene	TF_Name	Z-Score	Start	End
RC2G0064500	Myb_box5_MYB	1.7173	-597	-592
RC2G0064500	Myb_box5_MYB	1.7173	-595	-590
RC2G0064500	AuxRE_ARF	2.2505	-254	-249
Gene	TF_Name	Z-Score	Start	End
RC2G0097400	AuxRE_ARF	2.2126	-935	-930
RC2G0097400	AuxRE_ARF	2.2126	-938	-933
RC2G0097400	AuxRE_ARF	2.2126	-941	-936
RC2G0097400	G_box2_bZIP	1.7304	-661	-656
RC2G0097400	Myb_box3_MYB	1.735	-697	-692
RC2G0097400	Myb_box2_MYB	2.2775	-375	-370
RC2G0097400	Myb_box1_MYB	1.7261	-305	-300
RC2G0097400	Myb_box5_MYB	2.2805	-376	-371
RC2G0097400	Myb_box5_MYB	2.2805	-578	-573
RC2G0097400	DREB_AP2_EREBP	2.189	-928	-923
Gene	TF_Name	Z-Score	Start	End
RC2G0111500	Myb_box3_MYB	2.1576	-942	-937
RC2G0111500	Nac_box_NAC	2.812	-480	-475
RC2G0111500	N_box_bHLH	3.4912	-593	-588
RC2G0111500	Myb_box5_MYB	2.0567	-94	-89
RC2G0111500	Myb_box5_MYB	2.0567	-96	-91
Gene	TF_Name	Z-Score	Start	End
RC2G0172700	Nac_box_NAC	2.8489	-985	-980
RC2G0172700	W_box_WRKY	2.3363	-694	-689
Gene	TF_Name	Z-Score	Start	End
RC2G0198400	AuxRE_ARF	2.6841	-914	-909
RC2G0198400	AuxRE_ARF	2.6841	-911	-906
RC2G0198400	Myb_box5_MYB	1.9421	-606	-601
RC2G0198400	Myb_box5_MYB	1.9421	-933	-928
RC2G0198400	Myb_box1_MYB	2.115	-933	-928
RC2G0198400	W_box_WRKY	2.1792	-49	-44
RC2G0198400	W_box_WRKY	2.1792	-819	-814
RC2G0198400	Myb_box3_MYB	2.1105	-222	-217
RC2G0198400	Myb_box4_MYB	2.5226	-459	-453
RC2G0198400	Myb_box2_MYB	2.5871	-985	-980
RC2G0198400	Myb_box2_MYB	2.5871	-981	-976
Gene	TF_Name	Z-Score	Start	End
RC2G0207300	Myb_box2_MYB	2.6389	-152	-147
RC2G0207300	Myb_box2_MYB	2.6389	-987	-982
RC2G0207300	Myb_box5_MYB	2.012	-272	-267
RC2G0207300	Nac_box_NAC	2.7298	-880	-875
RC2G0207300	AuxRE_ARF	2.5003	-186	-181
RC2G0207300	Myb_box3_MYB	2.0782	-971	-966
Gene	TF_Name	Z-Score	Start	End
RC2G0211400	Myb_box2_MYB	2.664	-104	-99
RC2G0211400	N_box_bHLH	2.565	-10	-5
RC2G0211400	Myb_box5_MYB	2.6652	-878	-873
RC2G0211400	Myb_box1_MYB	2.7261	-878	-873
Gene	TF_Name	Z-Score	Start	End
RC2G0383900	G_box2_bZIP	2.7413	-802	-797
RC2G0383900	N_box_bHLH	2.5663	-821	-816
RC2G0383900	W_box_WRKY	2.1253	-926	-921
RC2G0383900	DREB_AP2_EREBP	2.5643	-795	-790
Gene	TF_Name	Z-Score	Start	End
RC2G0386100	Myb_box4_MYB	2.2799	-803	-797
RC2G0386100	Myb_box2_MYB	2.3619	-209	-204
RC2G0386100	Myb_box5_MYB	2.4861	-208	-203
RC2G0386100	Myb_box5_MYB	2.4861	-210	-205
RC2G0386100	G_box_bHLH	2.8919	-152	-147
RC2G0386100	W_box_WRKY	1.8112	-456	-451
RC2G0386100	DREB_AP2_EREBP	2.3754	-7	-2
RC2G0386100	Myb_box1_MYB	1.816	-844	-839
Gene	TF_Name	Z-Score	Start	End
RC2G0411100	DREB_AP2_EREBP	2.5903	-293	-288
RC2G0411100	DREB_AP2_EREBP	2.5903	-302	-297
RC2G0411100	DREB_AP2_EREBP	2.5903	-343	-338
RC2G0411100	DREB_AP2_EREBP	2.5903	-349	-344
RC2G0411100	Myb_box2_MYB	1.9163	-188	-183
RC2G0411100	Myb_box2_MYB	1.9163	-707	-702
RC2G0411100	Myb_box2_MYB	1.9163	-948	-943
RC2G0411100	Myb_box2_MYB	1.9163	-534	-529
RC2G0411100	N_box_bHLH	2.602	-584	-579
RC2G0411100	C_ABRE_bZIP	3.2032	-388	-383
RC2G0411100	Myb_box4_MYB	1.7998	-792	-786
RC2G0411100	Myb_box4_MYB	1.7998	-522	-516
RC2G0411100	GCC_box_AP2_EREBP	3.4108	-717	-712
RC2G0411100	Myb_box5_MYB	2.0761	-650	-645
RC2G0411100	Myb_box5_MYB	2.0761	-593	-588
Gene	TF_Name	Z-Score	Start	End
RC2G0412700	Myb_box2_MYB	2.4318	-630	-625
RC2G0412700	C_ABRE_bZIP	3.5477	-76	-71
RC2G0412700	W_box_WRKY	1.9173	-732	-727
RC2G0412700	Myb_box3_MYB	1.8515	-741	-736
RC2G0412700	Myb_box3_MYB	1.8515	-185	-180
RC2G0412700	Myb_box3_MYB	1.8515	-570	-565
RC2G0412700	Myb_box4_MYB	2.3301	-999	-993
RC2G0412700	Myb_box1_MYB	1.8403	-943	-938
RC2G0412700	Myb_box1_MYB	1.8403	-723	-718
RC2G0412700	Myb_box1_MYB	1.8403	-555	-550
RC2G0412700	Myb_box5_MYB	2.5162	-631	-626
RC2G0412700	Myb_box5_MYB	2.5162	-725	-720
RC2G0412700	Myb_box5_MYB	2.5162	-623	-618
RC2G0412700	DREB_AP2_EREBP	2.4201	-26	-21
Gene	TF_Name	Z-Score	Start	End
RC2G0414300	Myb_box5_MYB	2.1774	-318	-313
RC2G0414300	Myb_box5_MYB	2.1774	-308	-303
RC2G0414300	Myb_box5_MYB	2.1774	-371	-366
RC2G0414300	G_box2_bZIP	2.2646	-428	-423
RC2G0414300	Nac_box_NAC	2.8963	-853	-848
RC2G0414300	C_ABRE_bZIP	4.0448	-168	-163
RC2G0414300	Myb_box3_MYB	2.2212	-43	-38
Gene	TF_Name	Z-Score	Start	End
RC2G0415900	G_box2_bZIP	1.6951	-898	-893
RC2G0415900	Myb_box5_MYB	1.723	-235	-230
RC2G0415900	Myb_box5_MYB	1.723	-182	-177
RC2G0415900	Myb_box5_MYB	1.723	-738	-733
RC2G0415900	Myb_box3_MYB	1.7345	-515	-510
RC2G0415900	Nac_box_NAC	2.217	-383	-378
RC2G0415900	Myb_box1_MYB	1.7366	-738	-733
Gene	TF_Name	Z-Score	Start	End
RC2G0484100	AuxRE_ARF	2.6914	-16	-11
RC2G0484100	Myb_box1_MYB	2.8393	-674	-669
RC2G0484100	Myb_box5_MYB	2.7868	-674	-669
RC2G0484100	Myb_box4_MYB	2.6719	-653	-647
RC2G0484100	Myb_box4_MYB	2.6719	-132	-126
RC2G0484100	G_ABRE_bZIP	3.4652	-219	-212
RC2G0484100	W_box_WRKY	1.5177	-558	-553
RC2G0484100	HSE1_HSF	1.5851	-154	-147
RC2G0484100	G_box_bHLH	3.2551	-544	-539
RC2G0484100	G_box_bHLH	3.2551	-219	-214
Gene	TF_Name	Z-Score	Start	End
RC2G0491300	Myb_box2_MYB	2.3913	-997	-992
RC2G0491300	Myb_box1_MYB	1.5899	-392	-387
RC2G0491300	N_box_bHLH	2.1066	-618	-613
RC2G0491300	GCC_box_AP2_EREBP	3.4494	-664	-659
RC2G0491300	Myb_box5_MYB	1.5199	-392	-387
RC2G0491300	Myb_box5_MYB	1.5199	-996	-991
RC2G0491300	Myb_box5_MYB	1.5199	-58	-53
Gene	TF_Name	Z-Score	Start	End
RC2G0492200	Myb_box1_MYB	2.3491	-257	-252
RC2G0492200	Myb_box5_MYB	3.084	-259	-254
RC2G0492200	Myb_box3_MYB	2.3123	-591	-586
RC2G0492200	Myb_box3_MYB	2.3123	-448	-443
RC2G0492200	Myb_box3_MYB	2.3123	-512	-507
RC2G0492200	Myb_box3_MYB	2.3123	-231	-226
RC2G0492200	Myb_box3_MYB	2.3123	-365	-360
RC2G0492200	W_box_WRKY	2.4073	-811	-806
RC2G0492200	N_box_bHLH	2.9912	-146	-141
Gene	TF_Name	Z-Score	Start	End
RC2G0515500	Myb_box2_MYB	1.9959	-245	-240
RC2G0515500	GCC_box_AP2_EREBP	3.2896	-8	-3
RC2G0515500	GCC_box_AP2_EREBP	3.2896	-184	-179
RC2G0515500	C_ABRE_bZIP	3.0945	-78	-73
RC2G0515500	DREB_AP2_EREBP	2.0416	-120	-115
RC2G0515500	DREB_AP2_EREBP	2.0416	-251	-246
RC2G0515500	DREB_AP2_EREBP	2.0416	-289	-284
RC2G0515500	G_box_bHLH	2.63	-773	-768
RC2G0515500	G_box2_bZIP	2.2084	-275	-270
RC2G0515500	N_box_bHLH	2.6116	-114	-109
Gene	TF_Name	Z-Score	Start	End
RC2G0609100	Myb_box2_MYB	3.0983	-181	-176
RC2G0609100	W_box_WRKY	2.5053	-958	-953
RC2G0609100	Myb_box4_MYB	2.9642	-72	-66
RC2G0609100	Myb_box3_MYB	2.4029	-503	-498
RC2G0609100	Myb_box5_MYB	3.0755	-235	-230
RC2G0609100	Myb_box1_MYB	2.4188	-233	-228
RC2G0609100	DREB_AP2_EREBP	2.9865	-419	-414
Gene	TF_Name	Z-Score	Start	End
RC2G0612700	W_box_WRKY	2.4912	-176	-171
RC2G0612700	Myb_box5_MYB	3.37	-116	-111
RC2G0612700	HSE1_HSF	1.976	-59	-52
RC2G0612700	Myb_box3_MYB	2.4574	-430	-425
RC2G0612700	Myb_box1_MYB	1.6659	-430	-425
RC2G0612700	AuxRE_ARF	3.0536	-798	-793
RC2G0612700	AuxRE_ARF	3.0536	-661	-656
Gene	TF_Name	Z-Score	Start	End
RC2G0635800	Myb_box2_MYB	2.6944	-541	-536
RC2G0635800	W_box_WRKY	2.2187	-413	-408
RC2G0635800	W_box_WRKY	2.2187	-92	-87
RC2G0635800	DREB_AP2_EREBP	2.7466	-406	-401
RC2G0635800	Myb_box5_MYB	2.8397	-542	-537
RC2G0635800	Myb_box3_MYB	2.2065	-123	-118
Gene	TF_Name	Z-Score	Start	End
RC2G0653200	W_box_WRKY	2.391	-7	-2
RC2G0653200	Myb_box2_MYB	3.1937	-732	-727
RC2G0653200	Myb_box5_MYB	2.2328	-191	-186
RC2G0653200	Nac_box_NAC	2.9263	-378	-373
RC2G0653200	Nac_box_NAC	2.9263	-603	-598
RC2G0653200	AuxRE_ARF	3.0072	-458	-453
RC2G0653200	HBE_HB	1.5953	-298	-290
Gene	TF_Name	Z-Score	Start	End
RC2G0655200	AuxRE_ARF	2.5439	-694	-689
RC2G0655200	Myb_box2_MYB	2.6182	-313	-308
RC2G0655200	DREB_AP2_EREBP	2.4742	-316	-311
RC2G0655200	DREB_AP2_EREBP	2.4742	-36	-31
RC2G0655200	Myb_box1_MYB	2.619	-304	-299
RC2G0655200	C_ABRE_bZIP	3.6257	-28	-23
RC2G0655200	C_ABRE_bZIP	3.6257	-584	-579
RC2G0655200	N_box_bHLH	2.4839	-282	-277
RC2G0655200	G_box2_bZIP	1.8734	-121	-116
RC2G0655200	Myb_box5_MYB	2.5876	-304	-299
RC2G0655200	Myb_box5_MYB	2.5876	-208	-203
RC2G0655200	Myb_box5_MYB	2.5876	-314	-309
Gene	TF_Name	Z-Score	Start	End
RC2G0657700	Myb_box5_MYB	2.2588	-38	-33
RC2G0657700	Myb_box2_MYB	3.0296	-501	-496
RC2G0657700	C_ABRE_bZIP	4.0508	-97	-92
RC2G0657700	G_box_bHLH	3.5443	-734	-729
RC2G0657700	Myb_box1_MYB	1.6282	-729	-724
RC2G0657700	G_box2_bZIP	2.3587	-148	-143
RC2G0657700	Myb_box3_MYB	2.3306	-729	-724
Gene	TF_Name	Z-Score	Start	End
RC2G0660200	Myb_box1_MYB	1.9095	-946	-941
RC2G0660200	Myb_box1_MYB	1.9095	-555	-550
RC2G0660200	Myb_box5_MYB	1.7954	-946	-941
RC2G0660200	Myb_box5_MYB	1.7954	-555	-550
RC2G0660200	Myb_box3_MYB	1.8882	-605	-600
Gene	TF_Name	Z-Score	Start	End
RC3G0023600	G_ABRE_bZIP	3.2219	-195	-188
RC3G0023600	G_box_bHLH	2.9871	-195	-190
RC3G0023600	AuxRE_ARF	2.3416	-48	-43
RC3G0023600	AuxRE_ARF	2.3416	-55	-50
RC3G0023600	AuxRE_ARF	2.3416	-186	-181
RC3G0023600	AuxRE_ARF	2.3416	-58	-53
RC3G0023600	N_box_bHLH	2.9561	-217	-212
RC3G0023600	G_box2_bZIP	1.8559	-362	-357
RC3G0023600	G_box2_bZIP	1.8559	-165	-160
RC3G0023600	G_box1_bZIP	3.6074	-196	-189
RC3G0023600	Myb_box1_MYB	1.8522	-514	-509
RC3G0023600	Myb_box1_MYB	1.8522	-989	-984
RC3G0023600	Myb_box4_MYB	2.25	-270	-264
RC3G0023600	Myb_box5_MYB	1.7123	-514	-509
RC3G0023600	Myb_box5_MYB	1.7123	-989	-984
RC3G0023600	Myb_box5_MYB	1.7123	-97	-92
RC3G0023600	Myb_box5_MYB	1.7123	-469	-464
Gene	TF_Name	Z-Score	Start	End
RC3G0130000	Nac_box_NAC	3.0056	-551	-546
RC3G0130000	Nac_box_NAC	3.0056	-670	-665
RC3G0130000	Myb_box1_MYB	2.3218	-192	-187
RC3G0130000	Myb_box1_MYB	2.3218	-314	-309
RC3G0130000	DREB_AP2_EREBP	2.9152	-639	-634
RC3G0130000	DREB_AP2_EREBP	2.9152	-747	-742
RC3G0130000	Myb_box2_MYB	3.0586	-81	-76
RC3G0130000	Myb_box2_MYB	3.0586	-375	-370
RC3G0130000	AuxRE_ARF	3.0081	-365	-360
RC3G0130000	Myb_box3_MYB	2.2885	-147	-142
RC3G0130000	Myb_box5_MYB	2.9917	-376	-371
RC3G0130000	N_box_bHLH	2.9209	-490	-485
Gene	TF_Name	Z-Score	Start	End
RC3G0133600	Myb_box5_MYB	1.5268	-97	-92
RC3G0133600	Myb_box5_MYB	1.5268	-423	-418
RC3G0133600	Myb_box5_MYB	1.5268	-737	-732
RC3G0133600	W_box_WRKY	1.6377	-881	-876
RC3G0133600	W_box_WRKY	1.6377	-580	-575
RC3G0133600	Nac_box_NAC	3.0963	-81	-76
RC3G0133600	Nac_box_NAC	3.0963	-981	-976
RC3G0133600	Myb_box4_MYB	3.1936	-10	-4
RC3G0133600	Myb_box4_MYB	3.1936	-132	-126
RC3G0133600	G_box2_bZIP	3.2272	-49	-44
RC3G0133600	AuxRE_ARF	3.0342	-390	-385
RC3G0133600	AuxRE_ARF	3.0342	-820	-815
RC3G0133600	AuxRE_ARF	3.0342	-972	-967
Gene	TF_Name	Z-Score	Start	End
RC3G0135500	AuxRE_ARF	2.6143	-840	-835
RC3G0135500	G_box_bHLH	3.2472	-545	-540
RC3G0135500	Myb_box1_MYB	2.0797	-368	-363
RC3G0135500	DREB_AP2_EREBP	2.6888	-336	-331
RC3G0135500	Myb_box5_MYB	1.9993	-495	-490
RC3G0135500	Myb_box5_MYB	1.9993	-368	-363
RC3G0135500	Myb_box5_MYB	1.9993	-803	-798
RC3G0135500	Myb_box5_MYB	1.9993	-818	-813
RC3G0135500	Myb_box5_MYB	1.9993	-26	-21
RC3G0135500	GCC_box_AP2_EREBP	4.2292	-216	-211
RC3G0135500	G_box2_bZIP	2.0836	-169	-164
RC3G0135500	Myb_box3_MYB	2.0666	-758	-753
Gene	TF_Name	Z-Score	Start	End
RC3G0206800	G_ABRE_bZIP	3.3334	-233	-226
RC3G0206800	Myb_box5_MYB	1.7557	-514	-509
RC3G0206800	Myb_box5_MYB	1.7557	-250	-245
RC3G0206800	Myb_box5_MYB	1.7557	-531	-526
RC3G0206800	Myb_box5_MYB	1.7557	-529	-524
RC3G0206800	DREB_AP2_EREBP	3.0511	-220	-215
RC3G0206800	AuxRE_ARF	2.4403	-167	-162
RC3G0206800	Myb_box2_MYB	2.373	-515	-510
RC3G0206800	Myb_box2_MYB	2.373	-623	-618
RC3G0206800	G_box_bHLH	3.045	-350	-345
RC3G0206800	G_box_bHLH	3.045	-233	-228
RC3G0206800	Myb_box4_MYB	2.2729	-618	-612
Gene	TF_Name	Z-Score	Start	End
RC3G0214000	Myb_box5_MYB	1.9635	-948	-943
RC3G0214000	Myb_box5_MYB	1.9635	-421	-416
RC3G0214000	Myb_box5_MYB	1.9635	-849	-844
RC3G0214000	G_box2_bZIP	2.7695	-844	-839
RC3G0214000	Myb_box2_MYB	2.776	-61	-56
RC3G0214000	AuxRE_ARF	2.5703	-80	-75
RC3G0214000	W_box_WRKY	2.0915	-156	-151
RC3G0214000	DREB_AP2_EREBP	3.3966	-28	-23
RC3G0214000	Myb_box3_MYB	2.0159	-767	-762
Gene	TF_Name	Z-Score	Start	End
RC3G0216000	Myb_box1_MYB	2.3607	-398	-393
RC3G0216000	Myb_box5_MYB	2.2259	-398	-393
Gene	TF_Name	Z-Score	Start	End
RC3G0218200	GCC_box_AP2_EREBP	3.0817	-217	-212
RC3G0218200	GCC_box_AP2_EREBP	3.0817	-365	-360
RC3G0218200	GCC_box_AP2_EREBP	3.0817	-214	-209
RC3G0218200	GCC_box_AP2_EREBP	3.0817	-215	-210
RC3G0218200	GCC_box_AP2_EREBP	3.0817	-218	-213
RC3G0218200	G_ABRE_bZIP	2.0536	-829	-822
RC3G0218200	N_box_bHLH	1.7844	-538	-533
RC3G0218200	Myb_box2_MYB	1.7985	-608	-603
RC3G0218200	Myb_box2_MYB	1.7985	-327	-322
RC3G0218200	Myb_box2_MYB	1.7985	-481	-476
RC3G0218200	Myb_box4_MYB	1.666	-691	-685
Gene	TF_Name	Z-Score	Start	End
RC3G0225400	Myb_box5_MYB	1.5421	-979	-974
RC3G0225400	Myb_box5_MYB	1.5421	-34	-29
RC3G0225400	Myb_box5_MYB	1.5421	-776	-771
RC3G0225400	Myb_box5_MYB	1.5421	-774	-769
RC3G0225400	Nac_box_NAC	2.3464	-489	-484
RC3G0225400	Myb_box1_MYB	1.6664	-979	-974
RC3G0225400	W_box_WRKY	1.727	-761	-756
RC3G0225400	G_box2_bZIP	1.6572	-622	-617
RC3G0225400	AuxRE_ARF	2.2389	-584	-579
RC3G0225400	AuxRE_ARF	2.2389	-596	-591
Gene	TF_Name	Z-Score	Start	End
RC3G0227700	Myb_box1_MYB	2.3612	-760	-755
RC3G0227700	G_box2_bZIP	2.3327	-532	-527
RC3G0227700	W_box_WRKY	1.5629	-334	-329
RC3G0227700	Myb_box5_MYB	2.2881	-760	-755
RC3G0227700	Myb_box5_MYB	2.2881	-762	-757
Gene	TF_Name	Z-Score	Start	End
RC3G0231000	Myb_box5_MYB	2.3595	-452	-447
RC3G0231000	Myb_box2_MYB	3.2009	-378	-373
RC3G0231000	G_box_bHLH	3.6554	-846	-841
RC3G0231000	G_box_bHLH	3.6554	-804	-799
RC3G0231000	G_box_bHLH	3.6554	-627	-622
Gene	TF_Name	Z-Score	Start	End
RC3G0234100	N_box_bHLH	2.3872	-652	-647
RC3G0234100	DREB_AP2_EREBP	2.367	-667	-662
RC3G0234100	Nac_box_NAC	1.8472	-747	-742
RC3G0234100	AuxRE_ARF	1.9407	-662	-657
Gene	TF_Name	Z-Score	Start	End
RC3G0235000	Myb_box1_MYB	1.5668	-758	-753
RC3G0235000	Myb_box1_MYB	1.5668	-645	-640
RC3G0235000	Myb_box1_MYB	1.5668	-581	-576
RC3G0235000	Myb_box1_MYB	1.5668	-602	-597
RC3G0235000	Myb_box1_MYB	1.5668	-726	-721
RC3G0235000	G_box2_bZIP	2.1765	-905	-900
RC3G0235000	Myb_box5_MYB	1.5236	-645	-640
RC3G0235000	Myb_box5_MYB	1.5236	-581	-576
RC3G0235000	Myb_box5_MYB	1.5236	-856	-851
RC3G0235000	Myb_box5_MYB	1.5236	-602	-597
RC3G0235000	Myb_box5_MYB	1.5236	-726	-721
RC3G0235000	Myb_box5_MYB	1.5236	-758	-753
RC3G0235000	Myb_box5_MYB	1.5236	-433	-428
RC3G0235000	AuxRE_ARF	2.0913	-298	-293
Gene	TF_Name	Z-Score	Start	End
RC3G0235500	Myb_box1_MYB	2.6868	-143	-138
RC3G0235500	Nac_box_NAC	2.6133	-546	-541
RC3G0235500	Myb_box2_MYB	2.5282	-14	-9
RC3G0235500	Myb_box2_MYB	2.5282	-352	-347
RC3G0235500	Myb_box2_MYB	2.5282	-779	-774
RC3G0235500	G_box2_bZIP	2.6565	-88	-83
RC3G0235500	G_box1_bZIP	3.8023	-582	-575
RC3G0235500	Myb_box3_MYB	1.9697	-640	-635
RC3G0235500	G_box_bHLH	3.1315	-581	-576
RC3G0235500	G_ABRE_bZIP	2.8963	-615	-608
RC3G0235500	Myb_box5_MYB	2.5922	-727	-722
RC3G0235500	Myb_box5_MYB	2.5922	-143	-138
Gene	TF_Name	Z-Score	Start	End
RC3G0289300	Myb_box5_MYB	1.7781	-247	-242
RC3G0289300	Nac_box_NAC	2.5351	-955	-950
RC3G0289300	AuxRE_ARF	2.3826	-886	-881
RC3G0289300	Myb_box4_MYB	2.195	-148	-142
RC3G0289300	G_box2_bZIP	1.9247	-80	-75
RC3G0289300	N_box_bHLH	2.9462	-205	-200
Gene	TF_Name	Z-Score	Start	End
RC3G0301700	G_box1_bZIP	3.8715	-165	-158
RC3G0301700	G_ABRE_bZIP	3.5002	-164	-157
RC3G0301700	G_box_bHLH	3.2023	-797	-792
RC3G0301700	G_box_bHLH	3.2023	-164	-159
RC3G0301700	Myb_box5_MYB	2.6982	-959	-954
RC3G0301700	GCC_box_AP2_EREBP	4.0744	-180	-175
RC3G0301700	GCC_box_AP2_EREBP	4.0744	-179	-174
RC3G0301700	DREB_AP2_EREBP	2.5855	-509	-504
RC3G0301700	Myb_box3_MYB	2.0437	-346	-341
RC3G0301700	W_box_WRKY	2.0902	-133	-128
Gene	TF_Name	Z-Score	Start	End
RC3G0304800	Nac_box_NAC	3.1542	-724	-719
RC3G0304800	Myb_box1_MYB	2.5633	-743	-738
RC3G0304800	AuxRE_ARF	3.2067	-214	-209
RC3G0304800	W_box_WRKY	2.6393	-679	-674
RC3G0304800	Myb_box5_MYB	2.5029	-579	-574
RC3G0304800	Myb_box5_MYB	2.5029	-12	-7
RC3G0304800	Myb_box5_MYB	2.5029	-756	-751
RC3G0304800	Myb_box5_MYB	2.5029	-581	-576
RC3G0304800	Myb_box5_MYB	2.5029	-816	-811
RC3G0304800	Myb_box5_MYB	2.5029	-743	-738
Gene	TF_Name	Z-Score	Start	End
RC3G0308300	Myb_box5_MYB	2.2472	-74	-69
RC3G0308300	Myb_box5_MYB	2.2472	-624	-619
RC3G0308300	Myb_box5_MYB	2.2472	-403	-398
RC3G0308300	Myb_box5_MYB	2.2472	-561	-556
RC3G0308300	Myb_box5_MYB	2.2472	-619	-614
RC3G0308300	G_box2_bZIP	2.3725	-424	-419
RC3G0308300	Myb_box3_MYB	2.3335	-679	-674
RC3G0308300	Myb_box1_MYB	2.3441	-403	-398
Gene	TF_Name	Z-Score	Start	End
RC3G0309600	Myb_box1_MYB	1.7886	-504	-499
RC3G0309600	Myb_box5_MYB	2.4341	-200	-195
RC3G0309600	N_box_bHLH	2.9219	-272	-267
Gene	TF_Name	Z-Score	Start	End
RC3G0312000	GCC_box_AP2_EREBP	4.1289	-521	-516
RC3G0312000	Myb_box5_MYB	2.6674	-100	-95
RC3G0312000	Myb_box3_MYB	2.0143	-386	-381
RC3G0312000	Myb_box3_MYB	2.0143	-863	-858
RC3G0312000	Myb_box3_MYB	2.0143	-956	-951
RC3G0312000	N_box_bHLH	2.5587	-693	-688
RC3G0312000	Myb_box1_MYB	2.7265	-100	-95
Gene	TF_Name	Z-Score	Start	End
RC3G0312600	N_box_bHLH	2.53	-722	-717
RC3G0312600	Myb_box3_MYB	1.9829	-857	-852
RC3G0312600	Myb_box5_MYB	1.8282	-421	-416
RC3G0312600	Myb_box5_MYB	1.8282	-279	-274
RC3G0312600	AuxRE_ARF	2.5607	-392	-387
RC3G0312600	Nac_box_NAC	2.6831	-890	-885
RC3G0312600	Myb_box1_MYB	1.9849	-421	-416
Gene	TF_Name	Z-Score	Start	End
RC3G0313400	W_box_WRKY	2.4375	-46	-41
RC3G0313400	Nac_box_NAC	2.9674	-363	-358
RC3G0313400	Myb_box5_MYB	3.083	-572	-567
RC3G0313400	Myb_box1_MYB	3.15	-572	-567
RC3G0313400	G_box_bHLH	3.6619	-693	-688
Gene	TF_Name	Z-Score	Start	End
RC3G0314200	G_box2_bZIP	2.3952	-112	-107
RC3G0314200	HBE_HB	1.6761	-268	-260
RC3G0314200	Myb_box5_MYB	3.2229	-623	-618
Gene	TF_Name	Z-Score	Start	End
RC3G0406900	Myb_box5_MYB	3.1305	-693	-688
RC3G0406900	Myb_box4_MYB	3.0764	-384	-378
RC3G0406900	Nac_box_NAC	2.998	-243	-238
RC3G0406900	W_box_WRKY	1.5988	-919	-914
RC3G0406900	W_box_WRKY	1.5988	-568	-563
RC3G0406900	W_box_WRKY	1.5988	-114	-109
RC3G0406900	W_box_WRKY	1.5988	-331	-326
RC3G0406900	Myb_box2_MYB	3.1493	-694	-689
Gene	TF_Name	Z-Score	Start	End
RC3G0409500	AuxRE_ARF	2.5433	-867	-862
RC3G0409500	G_box_bHLH	3.2146	-787	-782
RC3G0409500	Myb_box5_MYB	1.8867	-135	-130
RC3G0409500	Myb_box5_MYB	1.8867	-308	-303
RC3G0409500	Myb_box5_MYB	1.8867	-997	-992
RC3G0409500	Myb_box5_MYB	1.8867	-654	-649
RC3G0409500	Myb_box5_MYB	1.8867	-111	-106
RC3G0409500	W_box_WRKY	2.0166	-229	-224
RC3G0409500	Myb_box1_MYB	1.9944	-135	-130
RC3G0409500	Myb_box2_MYB	2.6755	-112	-107
Gene	TF_Name	Z-Score	Start	End
RC3G0410700	G_box_bHLH	3.3569	-882	-877
RC3G0410700	GCC_box_AP2_EREBP	4.4392	-894	-889
RC3G0410700	Myb_box1_MYB	2.1114	-668	-663
RC3G0410700	Myb_box5_MYB	2.8343	-606	-601
RC3G0410700	AuxRE_ARF	2.7878	-531	-526
RC3G0410700	Myb_box3_MYB	2.0849	-662	-657
RC3G0410700	Nac_box_NAC	2.7507	-948	-943
RC3G0410700	Nac_box_NAC	2.7507	-811	-806
Gene	TF_Name	Z-Score	Start	End
RC4G0042000	Nac_box_NAC	2.7142	-139	-134
RC4G0042000	DREB_AP2_EREBP	2.6069	-368	-363
RC4G0042000	Myb_box5_MYB	2.7158	-173	-168
RC4G0042000	W_box_WRKY	2.1531	-53	-48
RC4G0042000	W_box_WRKY	2.1531	-246	-241
RC4G0042000	W_box_WRKY	2.1531	-40	-35
RC4G0042000	Myb_box2_MYB	2.7072	-242	-237
RC4G0042000	Myb_box3_MYB	2.0647	-741	-736
RC4G0042000	Myb_box3_MYB	2.0647	-219	-214
RC4G0042000	Myb_box3_MYB	2.0647	-429	-424
RC4G0042000	HSE1_HSF	1.507	-193	-186
RC4G0042000	G_box_bHLH	3.2544	-142	-137
RC4G0042000	G_box_bHLH	3.2544	-178	-173
Gene	TF_Name	Z-Score	Start	End
[truncated: 950 more rows]

[truncated: 1 more sheets: R. occidentalis]
