# Supplementary material for: Computational analysis of potential candidate genes involved in the cold stress response of ten Rosaceae members
Source: Research Square preprint supplement (doi:10.21203/rs.3.rs-1414236/v1), 2022-03-15

**Supplementary File S2. Pfam domain architecture for AP2/ERF family syntelog genes generated using Domosaic.** Two groups of AP2/ERF family genes have been shown with a central AP2 domain.

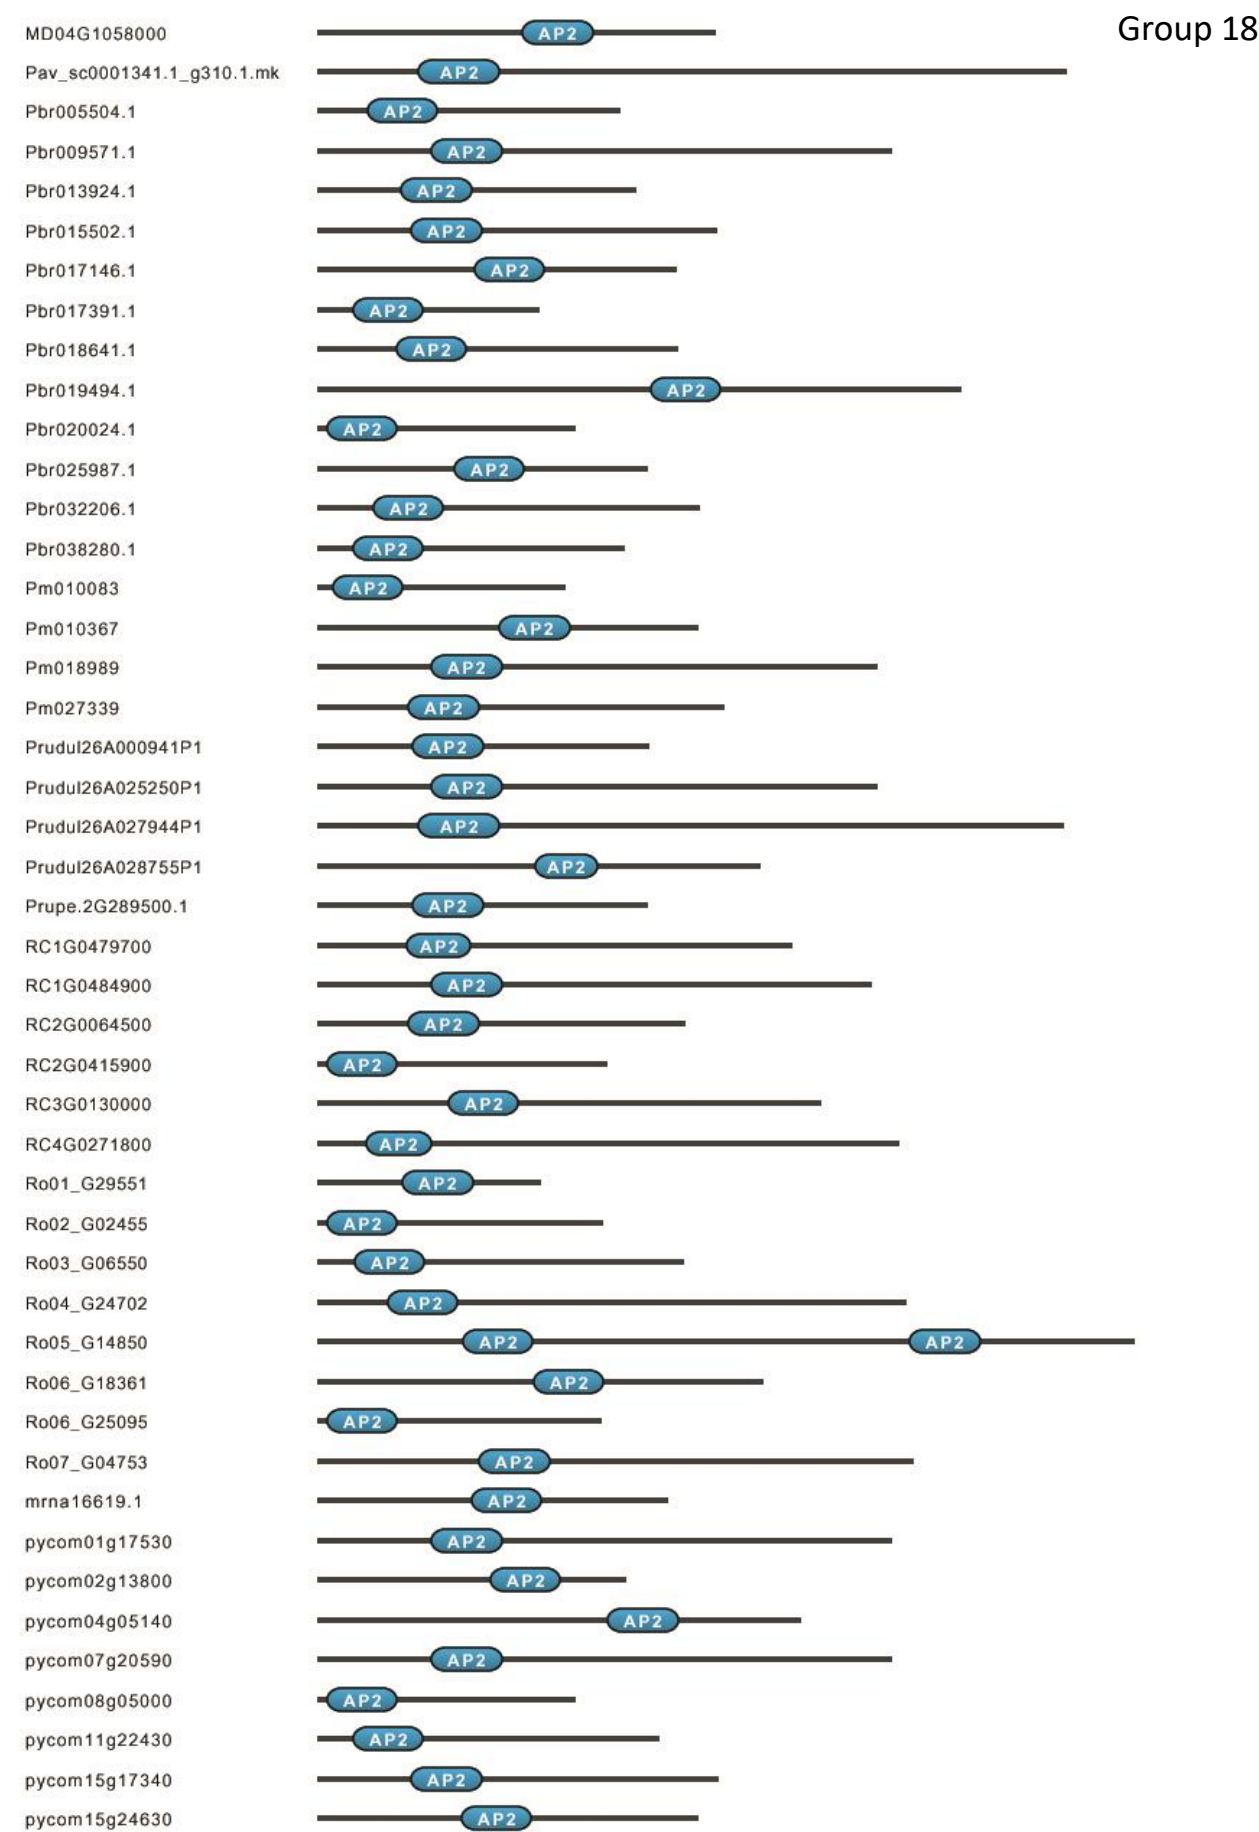

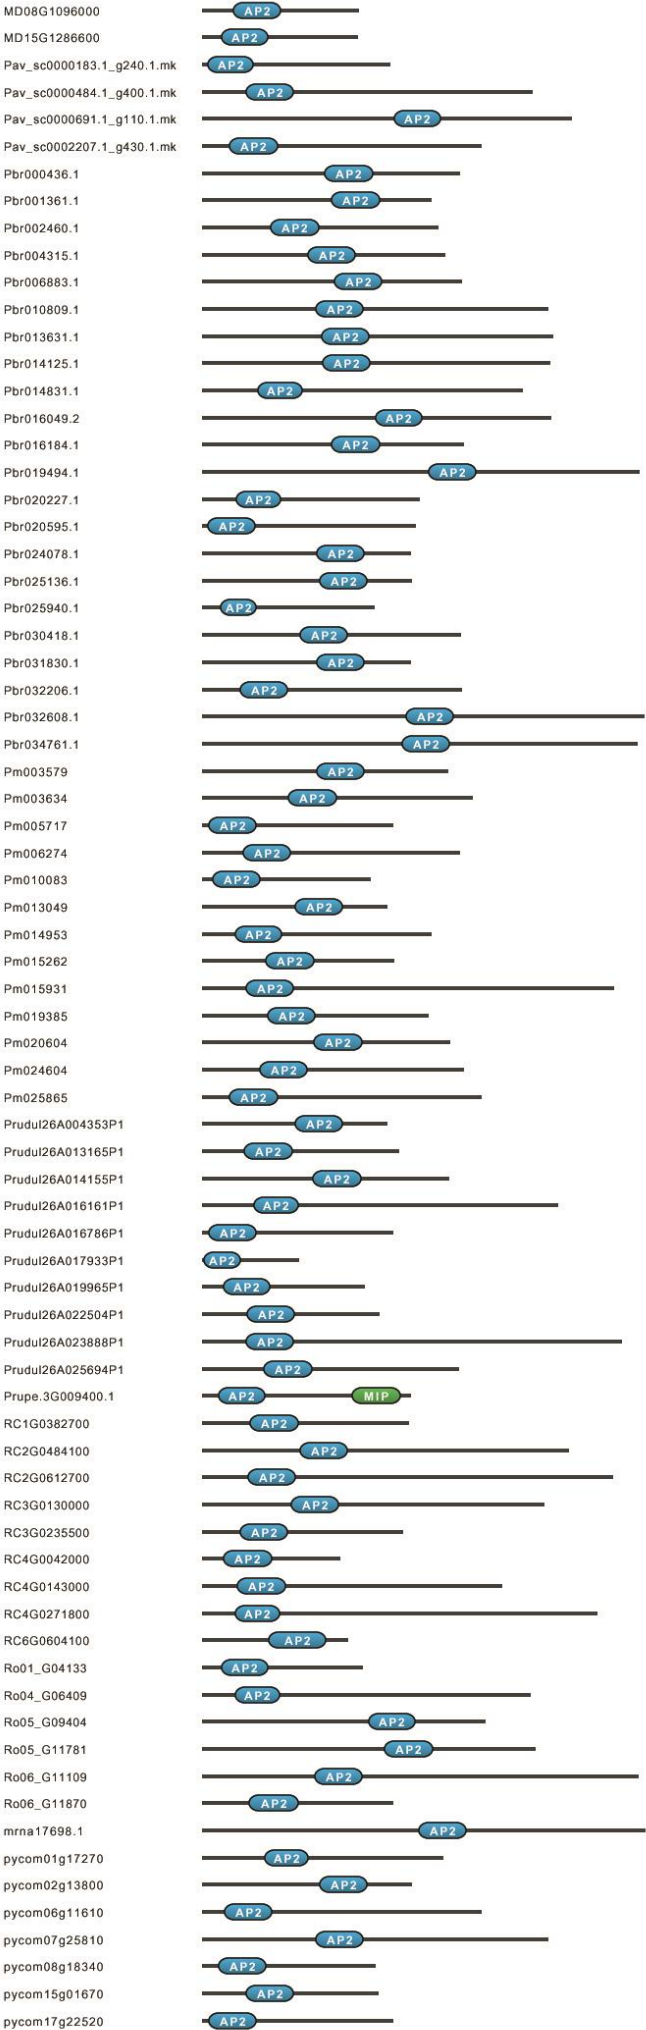

Supplement: Supplementary file [file 9cabeadbf970155810b7ffdc.pdf]
